# Supplementary material for: Synthesis and cholinesterase inhibitory activity study of Amaryllidaceae alkaloid analogues with N-methyl substitution
Source: Royal Society of Chemistry journal article supplement (doi:10.1039/d2ob00553k), 2022-01-01

Supporting Information for

## Synthesis and Cholinesterase Inhibitory Activity Study of Amaryllidaceae Alkaloid Analogues with *N*-Methyl Substitution

Petr Jansa,<sup>a</sup> Ivan Barvík,<sup>b</sup> Daniela Hulcová<sup>c</sup> and Eliška Matoušová<sup>a,\*</sup>

<sup>a</sup> Department of Organic Chemistry, Faculty of Science, Charles University, Hlavova 8, 128 00 Prague, Czech Republic

Phone: +420 221 95 1325, Fax: +420 221 95 1326

E-mail: eliska.matousova@natur.cuni.cz

<sup>b</sup> Faculty of Mathematics and Physics, Institute of Physics, Charles University, Ke Karlovu 2026/5, 121 16 Praha 2, Czech Republic

<sup>c</sup> Department of Pharmacognosy, Faculty of Pharmacy, Charles University, Heyrovského 1203, 500 05 Hradec Králové, Czech Republic

### Contents

|                                                                    |    |
|--------------------------------------------------------------------|----|
| 1. General.....                                                    | 2  |
| 2. Synthesis of starting material.....                             | 3  |
| 3. Approach I: <i>N</i> -oxide cyclisation .....                   | 4  |
| 3.1. Synthesis of starting alkyne 3 .....                          | 4  |
| 3.2. Synthesis of polycyclic compounds.....                        | 6  |
| 4. Approach II: Boc protection of nitrogen.....                    | 11 |
| 4.1 Synthesis of starting alkyne 8 .....                           | 11 |
| 4.2. Synthesis of polycyclic compounds.....                        | 12 |
| 5. Synthesis of <i>N</i> -alkyl quaternary salts .....             | 25 |
| 6. Enantioselective synthesis .....                                | 27 |
| 7. Biological testing .....                                        | 36 |
| 8. Molecular docking methods.....                                  | 38 |
| 9. References.....                                                 | 41 |
| 10. Copies of <sup>1</sup> H and <sup>13</sup> C NMR spectra ..... | 42 |

## 1. General

All chemicals and reagents were used as received from commercial suppliers without further purification. ZnBr<sub>2</sub> (Fluorochem) was dried at 140 °C under reduced pressure for 4 hours before use. Tetrahydrofuran was dried by distillation from sodium/benzophenone, ethyl acetate was distilled and then dried and stored over 4Å molecular sieves. Anhydrous dichloromethane, *N,N*-dimethylformamide and acetonitrile were purchased from Acros Organics. BDSB was prepared according to the literature.<sup>[1]</sup> Analytical thin-layer chromatography (TLC) performed on Merck Silica gel 60-F254 coated aluminium plates was carried out to monitor reactions. UV light (254 nm) and/or suitable TLC stain followed by heating were used for visualisation. To stain TLCs, the following dips were used: phosphomolybdate dip: Ce(SO<sub>4</sub>)<sub>2</sub>·4H<sub>2</sub>O (2 g), H<sub>3</sub>[P(Mo<sub>3</sub>O<sub>10</sub>)<sub>4</sub>] (4g), H<sub>2</sub>SO<sub>4</sub> (10 mL), H<sub>2</sub>O (200 mL); anisaldehyde dip: CH<sub>3</sub>COOH (99%)(6 mL), anisaldehyde (8 mL), CH<sub>3</sub>CH<sub>2</sub>OH (400 mL), H<sub>2</sub>SO<sub>4</sub> (20 mL); KMnO<sub>4</sub> dip: KMnO<sub>4</sub> (3 g), K<sub>2</sub>CO<sub>3</sub> (20 g), H<sub>2</sub>O (300 mL), 10% NaOH (2.5 mL) or ninhydrin dip: ninhydrin [(0.3 g), n-BuOH (100 mL), CH<sub>3</sub>COOH (99%) (3.0 mL)]. Column chromatography was performed on Acros Silica gel 60 A (35–70 µm). NMR spectra were recorded on Bruker AVANCE III 600, Bruker AVANCE III HD 400 spectrometers. The <sup>1</sup>H NMR spectra were recorded at room temperature in deuterated; chloroform [referenced to residual CHCl<sub>3</sub> signal (<sup>1</sup>H, δ = 7.26)], methanol [referenced to residual CH<sub>3</sub>OH (<sup>1</sup>H, δ = 3.31)], water [referenced to residual H<sub>2</sub>O (<sup>1</sup>H, δ = 4.79)], dichloromethane [referenced to residual CH<sub>2</sub>Cl<sub>2</sub> (<sup>1</sup>H, δ = 5.32)] or dimethyl sulfoxide [referenced to residual (CH<sub>3</sub>)<sub>2</sub>SO (<sup>1</sup>H, δ = 2.50)]. The <sup>13</sup>C NMR spectra were recorded at room temperature and referenced to residual solvent signal of CDCl<sub>3</sub> (<sup>13</sup>C, δ = 77.16), CD<sub>3</sub>OD (<sup>13</sup>C, δ = 49.00), CD<sub>2</sub>Cl<sub>2</sub> (<sup>13</sup>C, δ = 53.84) or (CD<sub>3</sub>)<sub>2</sub>SO (<sup>13</sup>C, δ = 39.52). Chemical shifts are reported in parts per million (δ scale) downfield from tetramethylsilane, coupling constants (*J*) are given in Hertz. Multiplicity is defined as s = singlet, d = doublet, t = triplet, q = quartet, m= multiplet or combination of the above. Infrared spectra were recorded in the range between 4000 and 400 cm<sup>-1</sup> with Thermo Nicolet AVATAR 370 FT-IR spectrometer in KBr via DRIFT method and are reported in wavenumbers (cm<sup>-1</sup>). Low-resolution mass spectra were measured using time-of-flight mass spectrometer GCT Premier (Waters), Q-Tof micro (Waters). The exact mass was measured using an LTQ Orbitrap XL hybrid mass spectrometer (Thermo Fisher Scientific). Melting points were measured on Büchi Melting Point B-545 using a capillary method and are uncorrected. Optical rotations measured on an automatic polarimeter, Autopol III are given in deg·mL·g<sup>-1</sup>·dm<sup>-1</sup> with accuracy ±2 and the mass concentrations (marked as c are given in g/100 mL). Chiral HPLC was carried out using an LC20AD Shimadzu liquid chromatograph with SPD-M20A diode array detector with columns Daicel Chiralpak<sup>®</sup> IA, Daicel Chiralpak<sup>®</sup> IC, Daicel Chiralcel<sup>®</sup> OD-H.

## 2. Synthesis of starting material

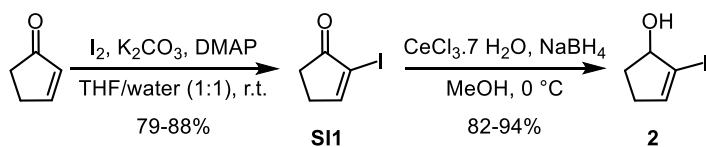

### 2-Iodocyclopent-2-en-1-one (SI1)

Ketone **SI1** was prepared using a procedure reported earlier<sup>[2]</sup> as a yellowish solid with yields in the range of 79-88%. The recorded spectral data were in agreement with previously reported values.<sup>[2]</sup>

<sup>1</sup>H NMR (400 MHz, CDCl<sub>3</sub>) δ 8.01 (t, *J* = 2.9 Hz, 1H), 2.80 – 2.74 (m, 2H), 2.53 – 2.47 (m, 2H); <sup>13</sup>C NMR (100 MHz, CDCl<sub>3</sub>) δ 204.1, 169.7, 103.0, 31.4, 31.0.

### 2-Iodocyclopent-2-en-1-ol (2)

Alcohol **2** was prepared from ketone **SI1** using the procedure reported earlier<sup>[2]</sup> as a white solid with yields in the range of 82-94%. The recorded spectral data were in agreement with previously reported values.<sup>[2]</sup>

<sup>1</sup>H NMR (400 MHz, CDCl<sub>3</sub>) δ 6.29 (td, *J* = 2.5, 1.0 Hz, 1H), 4.73 – 4.66 (m, 1H), 2.55 – 2.45 (m, 1H), 2.38 – 2.25 (m, 2H), 1.94 – 1.81 (m, 2H); <sup>13</sup>C NMR (100 MHz, CDCl<sub>3</sub>) δ 142.8, 100.4, 82.4, 32.9, 31.6.

### 3. Approach I: *N*-oxide cyclisation

#### 3.1. Synthesis of starting alkyne **3**

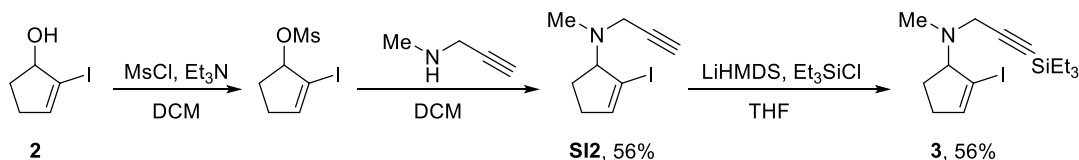

#### 2-Iodo-*N*-methyl-*N*-(prop-2-yn-1-yl)cyclopent-2-en-1-amine (SI2)

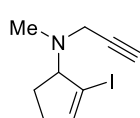

Compound **2** (420 mg, 2.00 mmol) was dissolved in dry DCM (3.5 mL) under argon atmosphere and cooled down to 0 °C. Et<sub>3</sub>N (0.6 mL, 4.60 mmol) and methanesulfonyl chloride (0.2 mL, 2.40 mmol) were added to the solution. The reaction mixture was stirred at 0 °C for 1 h before the addition of a saturated aqueous solution of NH<sub>4</sub>Cl (3 mL). The mixture was extracted between EtOAc (3 × 30 mL) and water (20 mL), then combined organic layers were dried over Na<sub>2</sub>SO<sub>4</sub>, filtered, and concentrated under reduced pressure. The crude mesylate was dissolved in DCM (3.5 mL), cooled down to 0 °C and treated with Et<sub>3</sub>N (0.6 mL, 4.00 mmol) and *N*-methyl propargylamine (371 μL, 4.40 mmol) before being allowed to warm up and then stirred at room temperature for 67 h. The reaction mixture was extracted between 1M aqueous solution of Na<sub>2</sub>CO<sub>3</sub> (30 mL) and EtOAc (3 × 30 mL) and combined organic layers were dried over Na<sub>2</sub>SO<sub>4</sub>, filtered, and concentrated under reduced pressure. The crude product was purified by column chromatography on silica gel (gradient elution 9/1 → 8/2 hexanes/EtOAc) to give the title compound as an orange oil (296 mg, 57%).

<sup>1</sup>H NMR (400 MHz, CDCl<sub>3</sub>) δ 6.31 (td, *J* = 2.6, 1.7 Hz, 1H), 4.03 – 3.94 (m, 1H), 3.40 (dd, *J* = 16.8, 2.5 Hz, 1H), 3.30 (dd, *J* = 16.8, 2.4 Hz, 1H), 2.40 – 2.28 (m, 2H), 2.28 (s, 3H), 2.20 (t, *J* = 2.5 Hz, 1H), 2.13 – 2.02 (m, 1H), 1.83 (dtd, *J* = 13.7, 8.8, 5.9 Hz, 1H); <sup>13</sup>C NMR (100 MHz, CDCl<sub>3</sub>) δ 142.5, 99.3, 81.0, 74.7, 72.3, 42.9, 35.8, 33.7, 20.3; IR (KBr) ν 3294, 2938, 2845, 2789, 1604, 1452, 1362, 1302, 1207, 1129, 1033, 911, 812, 656 cm<sup>-1</sup>; MS (ESI) *m/z* (%) 262.0 (100, [M+H]<sup>+</sup>), 193.0 (41), 137.1 (4), 70.1 (47); HRMS (ESI) *m/z* calcd for C<sub>9</sub>H<sub>13</sub>NI 262.0087, found 262.0088.

#### 5,5'-Oxybis(1-iodocyclopent-1-ene) (SI3)

The title compound was synthesized as an unexpected product of mesylation under the different conditions. The compound was prepared from alcohol **2** (56 mg, 0.27 mmol) dissolved in dry DCM

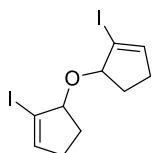

(1.1 mL) under argon atmosphere to which dry Et<sub>3</sub>N (111 uL, 0.80 mmol) and silver trifluoromethanesulfonate (136 mg, 0.53 mmol) were added. The resulting mixture was cooled to 0 °C and methanesulfonyl chloride (31 uL, 0.40 mmol) was dropped in within 5 min. The mixture was allowed to warm to room temperature and stirred for 23 h before being extracted with DCM (3 × 20 mL) and a saturated aqueous solution of NaHCO<sub>3</sub>. Combined organic layers were dried over Na<sub>2</sub>SO<sub>4</sub> and after filtration concentrated under reduced pressure. 25 % (NMR yield based on mesitylene as an internal standard) of the title compound was formed. The crude can be purified by short column chromatography on silica gel using DCM as a mobile phase.

**<sup>1</sup>H NMR** (400 MHz, CDCl<sub>3</sub>) δ 6.37 – 6.29 (m, 2H), 4.61 – 4.51 (m, 2H), 2.59 – 2.43 (m, 2H), 2.34 – 2.19 (m, 4H), 2.15 – 2.06 (m, 1H), 2.05 – 1.94 (m, 1H); **<sup>13</sup>C NMR** (100 MHz, CDCl<sub>3</sub>) δ 144.0, 143.8, 97.0, 96.9, 90.0, 88.7, 33.1, 32.8, 31.0, 30.8; **IR** (KBr) ν 2960, 2916, 2848, 1734, 1604, 1456, 1331, 1153, 1084, 1045, 924, 818 cm<sup>-1</sup>; **MS** (ESI) *m/z* (%) 424.8 (100, [M+Na]<sup>+</sup>), 381.3 (38), 353.2 (36), 312.9 (20), 264.9 (14), 257.0 (5), 192.9 (21); **HRMS** (ESI) *m/z* calcd for C<sub>10</sub>H<sub>12</sub>OI<sub>2</sub>Na 424.8870, found 424.8869.

### 2-Iodo-*N*-methyl-*N*-(3-(triethylsilyl)prop-2-yn-1-yl)cyclopent-2-en-1-amine (3)

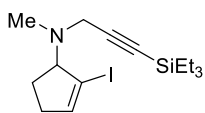

Compound **SI2** (695 mg, 2.66 mmol) was dissolved in dry THF (2.7 mL) under argon atmosphere and cooled to -78 °C. LiHMDS (3.2 mL of 1 M solution in THF, 3.20 mmol) was added dropwise and the mixture was stirred for 1 h at the same temperature. Then chlorotriethylsilane (546 uL, 3.19 mmol) was added and the reaction mixture was allowed to warm to room temperature and stirred for an additional 1 h. A saturated aqueous solution of NH<sub>4</sub>Cl (4 mL) was added and the resulting mixture was extracted between EtOAc (3 × 40 mL) and water (25 mL). The combined organic layers were dried with Na<sub>2</sub>SO<sub>4</sub>, filtered and concentrated under reduced pressure. The crude product was purified by column chromatography (93/7 hexanes/EtOAc) to provide the title compound as a light yellow (976 mg, 98%).

**<sup>1</sup>H NMR** (400 MHz, CDCl<sub>3</sub>) δ 6.31 (td, *J* = 2.5, 1.7 Hz, 1H), 4.04 – 3.98 (m, 1H), 3.46 (d, *J* = 17.1 Hz, 1H), 3.39 (d, *J* = 17.1 Hz, 1H), 2.42 – 2.25 (m, 2H), 2.28 (s, 3H), 2.17 (ddt, *J* = 13.4, 8.8, 4.4 Hz, 1H), 1.82 (dtd, *J* = 13.7, 9.0, 5.7 Hz, 1H), 0.99 (t, *J* = 7.9 Hz, 9H), 0.64 – 0.55 (m, 6H); **<sup>13</sup>C NMR** (100 MHz, CDCl<sub>3</sub>) δ 142.6, 104.4, 99.7, 86.5, 74.8, 44.2, 35.7, 33.8, 20.5, 7.6, 4.5; **IR** (KBr): ν 2950, 2905, 2872, 2842, 2783, 1458, 1413, 1234, 1204, 1126, 1042, 1015, 979, 815, 743, 725 cm<sup>-1</sup>; **MS** (EI) *m/z* (%) 375.1 (51, M<sup>+</sup>), 248.2 (87), 220.2 (35), 154.1 (35), 132.1 (95), 115.1 (44), 97.0 (48), 87.0 (100), 68.0 (60), 66.0 (59), 59.0 (59), 55.0 (41); **HRMS** (ESI) *m/z* calcd for C<sub>15</sub>H<sub>26</sub>INiSi 375.0879, found 375.0876.

## 3.2. Synthesis of polycyclic compounds

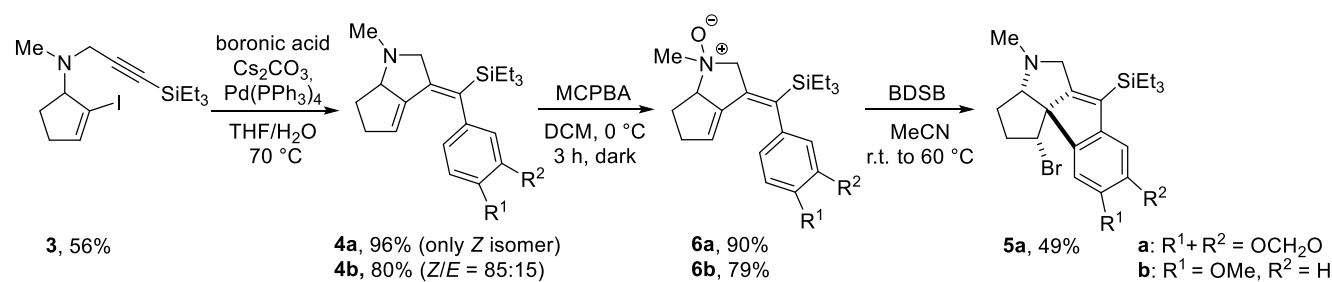Table S1. Halocyclisation of tertiary and quaternary amines and N-oxides **4** and **6**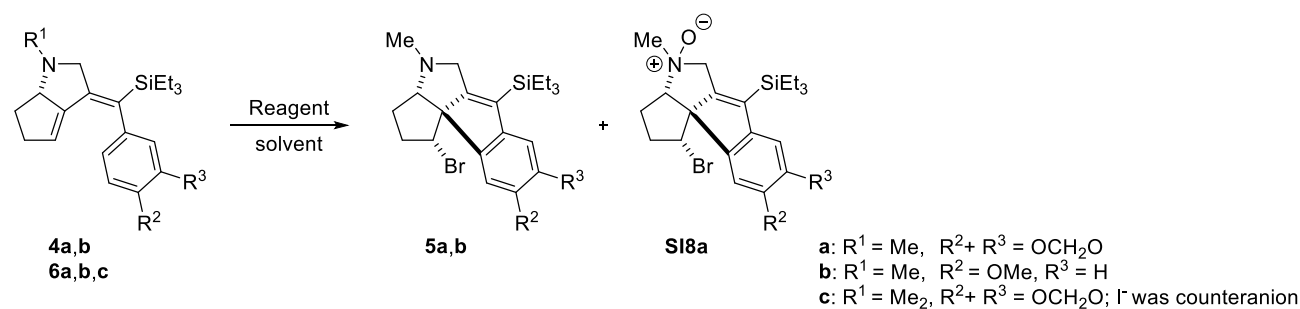

| Entry | Substrate | Reagent <sup>a)</sup> | Solvent  | Conditions                                            | Result                           | Observation                     |
|-------|-----------|-----------------------|----------|-------------------------------------------------------|----------------------------------|---------------------------------|
| 1     | <b>4b</b> | NIS                   | DCM/HFIP | 0 °C - r.t. (2 days)                                  | ---                              | <b>4b</b> (s.m.)                |
| 2     | <b>4a</b> | NIS                   | MeCN     | r.t. (4 h)                                            | ---                              | <b>4a</b> (s.m.)                |
| 3     | <b>4a</b> | NIS                   | MeCN     | r.t. (22 h)                                           | decomp.                          | <b>4a</b> (s.m.)                |
| 4     | <b>4a</b> | BDSB <sup>b)</sup>    | MeCN     | r.t. (0.3 h)                                          | <b>5a</b> (33%)                  | <b>4a</b> (s.m.)                |
| 5     | <b>6b</b> | NIS <sup>c)</sup>     | HFIP     | 0 °C - r.t. (3 days)                                  | side prod.                       | <b>6b</b> (s.m.)                |
| 6     | <b>6b</b> | BDSB                  | MeCN     | r.t. (1 h)                                            | <b>5b</b> (traces) <sup>d)</sup> | <b>4b</b> , decomp.             |
| 7     | <b>6a</b> | NIS                   | MeCN     | r.t. (20 h), 40 °C (1 h)                              | side prod.                       | ---                             |
| 8     | <b>6a</b> | BDSB                  | MeCN     | 0 °C (1 h)                                            | <b>5a</b> (traces)               | ---                             |
| 9     | <b>6a</b> | BDSB                  | MeCN     | r.t. (3 h), 40 °C (3 h),<br>60 °C (0.5 h), r.t.(17 h) | <b>5a</b> (49%)                  | <b>SI8a</b> (10%) <sup>d)</sup> |
| 10    | <b>6a</b> | BDSB                  | MeCN     | 40 °C (7 h), r.t. (16 h)                              | <b>5a</b> (traces)               | ---                             |
| 11    | <b>6a</b> | BDSB                  | MeCN     | 60 °C (3 h)                                           | decomp.                          | ---                             |
| 12    | <b>6a</b> | Me <sub>2</sub> S     | MeCN     | r.t. (2 days)                                         | ---                              | <b>6a</b> (s.m.)                |
| 13    | <b>6a</b> | Me <sub>2</sub> S     | MeCN     | 60 °C (6 h)                                           | ---                              | <b>6a</b> (s.m.)                |
| 14    | <b>6c</b> | NIS                   | DCM      | r.t. (3 h)                                            | ---                              | <b>6c</b> (s.m.)                |
| 15    | <b>6c</b> | BDSB                  | DCM      | r.t. (3 h)                                            | ---                              | <b>6c</b> (s.m.)                |

<sup>a)</sup> NIS (1.2 eq.), BDSB (1.05 eq.) or Me<sub>2</sub>S (1-11eq.) were used. <sup>b)</sup> Bromodiethylsulfonium bromopentachloroantimonate (see ref. <sup>11</sup>) <sup>c)</sup> Morfoline (1.4 eq.) was used as an additive. <sup>d)</sup> The compound was not fully characterised.

**(Z)-3-(Benzo[d][1,3]dioxol-5-yl(triethylsilyl)methylene)-1-methyl-1,2,3,5,6,6a-hexahydrocyclopenta[b]pyrrole ((Z)-4a)**

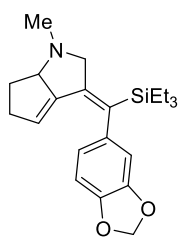

Compound **3** (208 mg, 0.55 mmol) was dissolved in mixture of THF (9.1 mL) and H<sub>2</sub>O (0.9 mL), followed by addition of 3,4-(methylenedioxy)phenylboronic acid (149 mg, 0.88 mmol) and caesium carbonate (364 mg, 1.11 mmol). The mixture was degassed by evacuation and backfilling with argon (2x), then Pd(PPh<sub>3</sub>)<sub>4</sub> (32 mg, 0.028 mmol) was added and the degassing procedure was repeated again. Then it was warmed to 70 °C, stirred for 20 h under argon atmosphere and cooled to room temperature before being extracted between EtOAc (3 × 40 mL) and brine (40 mL). The combined organic layers were dried with Na<sub>2</sub>SO<sub>4</sub>, filtered and concentrated under reduced pressure. The crude product was purified by column chromatography (90/10/1.5 hexanes/EtOAc/Et<sub>3</sub>N) to provide the title compound as an orange oil (195 mg, 96%).

<sup>1</sup>H NMR (400 MHz, CDCl<sub>3</sub>) δ 6.74 (d, *J* = 8.2 Hz, 1H), 6.52 – 6.33 (m, 2H), 5.97 – 5.89 (m, 2H), 4.57 – 4.50 (m, 1H), 4.03 (d, *J* = 13.2 Hz, 1H), 3.30 – 3.21 (m, 1H), 3.23 (d, *J* = 13.1 Hz, 1H), 2.60 – 2.36 (m, 2H), 2.34 (s, 3H), 2.01 (dtd, *J* = 11.7, 6.4, 1.1 Hz, 1H), 1.48 (ddt, *J* = 11.8, 10.4, 8.9 Hz, 1H), 0.90 (t, *J* = 7.9 Hz, 9H), 0.62 – 0.52 (m, 6H); <sup>13</sup>C NMR (100 MHz, CDCl<sub>3</sub>) δ 147.8, 147.7, 147.4, 145.29, 145.27, 143.7, 139.3, 139.2, 135.8, 124.9, 124.6, 120.1, 120.0, 108.9, 108.2, 108.0, 100.7, 77.5, 67.0, 41.2, 37.3, 31.2, 7.7, 3.7, All the aromatic signals are doubled due to the presence of atropisomers; IR (KBr) ν 2953, 2869, 2833, 2765, 1479, 1323, 1240, 1225, 1213, 1039, 1006, 937, 725 cm<sup>-1</sup>; MS (EI) *m/z* (%) 370.2 (10), 369.2 (45, [M<sup>+</sup>]), 340.2 (9), 255.1 (25), 254.1 (100), 248.2 (10), 134.1 (8), 87.1 (5), 59.0 (4); HRMS (EI) *m/z* calcd for C<sub>22</sub>H<sub>31</sub>NO<sub>2</sub>Si 369.2124, found 369.2118.

**(Z)-3-((4-Methoxyphenyl)(triethylsilyl)methylene)-1-methyl-1,2,3,5,6,6a-hexahydrocyclopenta[b]pyrrole (4b)**

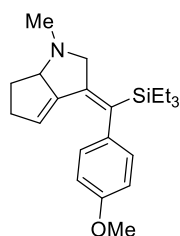

Compound **3** (526 mg, 1.40 mmol) was dissolved in the mixture THF (10.5 mL) and H<sub>2</sub>O (2.1 mL). 4-methoxyphenylboronic acid (341 mg, 2.24 mmol) and caesium carbonate (912 mg, 2.80 mmol) were added. The mixture was degassed by evacuation and backfilling with argon (2x), then Pd(PPh<sub>3</sub>)<sub>4</sub> (41 mg, 0.04 mmol) was added and the degassing procedure was repeated again. Then it was warmed to 70 °C, stirred for 23 h under argon atmosphere, cooled to room temperature and extracted between EtOAc (3 × 40 mL) and water (35 mL). The combined organic layers were dried with Na<sub>2</sub>SO<sub>4</sub>, filtered and concentrated under reduced pressure. The crude product was purified by

column chromatography (gradient elution 90/10/1 → 70/30/1 hexanes/EtOAc/Et<sub>3</sub>N) to provide the title compound (418 mg, 80%) in ratio of *Z/E* isomers 85/15 from which (*Z*)-**4b** (60 mg, 11%) was isolated in pure form as a brown oil.

(*Z*)-**4b**: <sup>1</sup>H NMR (400 MHz, CDCl<sub>3</sub>) δ 6.95 – 6.79 (m, 4H), 4.39 – 4.35 (m, 1H), 4.04 (d, *J* = 13.1 Hz, 1H), 3.79 (s, 3H), 3.29 – 3.21 (m, 2H), 2.56 – 2.34 (m, 2H), 2.34 (s, 3H), 1.99 (dt, *J* = 12.4, 6.4 Hz, 1H), 1.52 – 1.40 (m, 1H), 0.90 (t, *J* = 7.9 Hz, 9H), 0.56 (q, *J* = 7.6 Hz, 6H); <sup>13</sup>C NMR (100 MHz, CDCl<sub>3</sub>) δ 157.6, 148.1, 143.5, 137.8, 135.8, 128.4, 128.3, 124.4, 114.3, 113.3, 77.6, 67.1, 55.3, 41.3, 37.3, 31.2, 7.7, 3.7; IR (KBr) ν 2950, 2869, 2836, 2768, 1607, 1509, 1461, 1278, 1242, 1186, 1039, 1000, 955, 920, 716 cm<sup>-1</sup>; MS (CI) *m/z* (%) 356.2 (57, [M+H]<sup>+</sup>), 355.2 (100, M<sup>+</sup>), 340.2 (5), 326.2 (26), 240.1 (34); HRMS (CI) *m/z* calcd for C<sub>22</sub>H<sub>34</sub>NOSi 356.2410, found 356.2408.

**(*Z*)-3-(Benzo[*d*][1,3]dioxol-5-yl(triethylsilyl)methylene)-1-methyl-1,2,3,5,6,6a-hexahydro-cyclopenta[*b*]pyrrole 1-oxide (6a)**

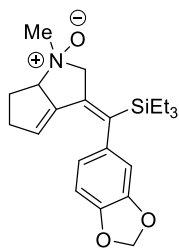

Compound (*Z*)-**4a** (50 mg, 0.14 mmol) was dissolved in dry DCM (4 mL) under argon atmosphere. The flask was covered with aluminium foil and cooled to 0 °C. At this temperature, *m*-chloroperoxybenzoic acid (26 mg, 0.15 mmol) was added and the reaction mixture was stirred for 3 h. The reaction was quenched with water (10 mL) and extracted with DCM (3 × 20 mL). The combined organic layers were dried with Na<sub>2</sub>SO<sub>4</sub>, filtered, and concentrated under reduced pressure. The crude product was purified by column chromatography (gradient elution 95/5 → 90/10 DCM/MeOH) to give the title compound as a brown foam (47 mg, 90%). The reaction was repeated several times with the yields in the range of 77-90%.

<sup>1</sup>H NMR (400 MHz, CDCl<sub>3</sub>) δ 6.76 – 6.70 (m, 1H), 6.58 – 6.48 (m, 1H), 6.37 – 6.29 (m, 1H), 5.95 – 5.89 (m, 2H), 4.83 – 4.78 (m, 1H), 4.67 – 4.54 (m, 3H), 3.25 (s, 3H), 2.65 – 2.48 (m, 3H), 1.91 – 1.83 (m, 1H), 0.89 (t, *J* = 7.9 Hz, 9H), 0.62 – 0.50 (m, 6H); <sup>13</sup>C NMR (100 MHz, CDCl<sub>3</sub>) δ 147.9, 147.5, 145.7, 140.9, 140.7, 137.9, 137.8, 137.7, 130.3, 129.8, 120.2, 119.7, 108.9, 108.2, 108.1, 107.6, 100.94, 100.88, 87.3, 80.3, 55.7, 37.3, 22.0, 7.6, 3.7; IR (KBr) ν 3434, 2956, 2878, 1604, 1485, 1431, 1329, 1237, 1222, 1036, 1003, 943, 719 cm<sup>-1</sup>; MS (ESI) *m/z* (%) 1178.6 (13, [3M+Na]<sup>+</sup>), 771.4 (100, [2M+H]<sup>+</sup>), 408.2 (18, [M+Na]<sup>+</sup>), 386.2 (17, [M+H]<sup>+</sup>); HRMS (ESI) *m/z* calcd for C<sub>22</sub>H<sub>32</sub>O<sub>3</sub>NSi 386.2146, found 386.2144.



**(Z)-3-((4-Methoxyphenyl)(triethylsilyl)methylene)-1-methyl-1,2,3,5,6,6a-hexahydrocyclopenta[*b*]pyrrole 1-oxide (6b)**

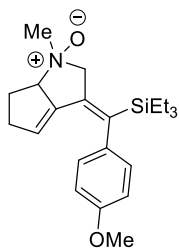

Compound (*Z*)-**4b** (62 mg, 0.17 mmol) was dissolved in dry DCM (5.2 mL) under argon atmosphere. The flask was covered with aluminium foil and cooled to 0 °C. At this temperature, *m*-chloroperoxybenzoic acid (33 mg, 0.19 mmol) was added and the reaction mixture was stirred for 3.5 h. The reaction was quenched with water (20 mL) and the mixture was extracted with DCM (6 × 40 ml). The combined organic layers were dried with Na<sub>2</sub>SO<sub>4</sub>, filtered and concentrated under reduced pressure. The crude product was purified by column chromatography (gradient elution 100 → 90/10 DCM/MeOH) to give the title compound as a white amorphous solid (51 mg, 79%).

<sup>1</sup>H NMR (400 MHz, CD<sub>2</sub>Cl<sub>2</sub>) δ 7.00 – 6.91 (m, 1H), 6.91 – 6.80 (m, 3H), 4.67 – 4.57 (m, 3H), 4.45 (d, *J* = 13.6 Hz, 1H), 3.79 (s, 3H), 3.17 (s, 3H), 2.56 – 2.35 (m, 3H), 1.88 – 1.79 (m, 1H), 0.92 (t, *J* = 7.9 Hz, 9H), 0.65 – 0.53 (m, 6H); <sup>13</sup>C NMR (100 MHz, CD<sub>2</sub>Cl<sub>2</sub>) δ 158.4, 142.3, 140.5, 138.6, 136.9, 129.3, 128.4, 128.2, 114.8, 113.7, 87.3, 80.6, 55.7, 55.5, 37.4, 22.1, 7.6, 4.0; IR (KBr) ν 3324, 2953, 2869, 2839, 1601, 1509, 1284, 1248, 1186, 1045, 1006, 946, 872, 722 cm<sup>-1</sup>; MS (ESI) *m/z* (%) 743.4 (28, [2M+H]<sup>+</sup>), 394.2 (26, [M+Na]<sup>+</sup>), 372.2 (100, [M+H]<sup>+</sup>); HRMS (ESI) *m/z* calcd for C<sub>22</sub>H<sub>34</sub>O<sub>2</sub>NSi 372.2353, found 372.2351.

**1-Bromo-4-methyl-6-(triethylsilyl)-1,2,3,3a,4,5-hexahydro-[1,3]dioxolo[4',5':5,6]indeno[1,2-*c*]cyclopenta[*b*]pyrrole (5a)**

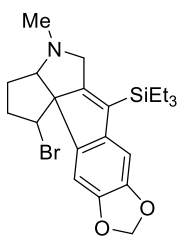

Compound **6a** (30 mg, 0.08 mmol) was dissolved in dry MeCN (1.6 mL) under argon atmosphere. The BDSB (45 mg, 0.08 mmol) was added and the reaction warmed up and stirred at room temperature for 3 h, 40 °C for 3 h, 60 °C for 0.5 h and then left to stir at room temperature for 16 h. The reaction was quenched (based on TLC developed in mobile phase 10/4 acetone/MeOH with 5 drops of Et<sub>3</sub>N) with the saturated aqueous solution of N<sub>2</sub>S<sub>2</sub>O<sub>3</sub> (10 mL) and the resulting mixture was extracted between EtOAc (25 mL) and DCM (3 × 25 mL). The combined organic layers were dried over Na<sub>2</sub>SO<sub>4</sub>, filtered and concentrated under reduced pressure. The crude product was purified by column chromatography (gradient elution 100/0 → 90/10 DCM/MeOH) to give the title compound as an amorphous brown solid (17 mg, 49%).

<sup>1</sup>H NMR (400 MHz, CDCl<sub>3</sub>) δ 6.80 (s, 1H), 6.64 (s, 1H), 5.93 (s, 2H), 4.41 (dd, *J* = 9.8, 7.5 Hz, 1H), 4.06 (d, *J* = 13.6 Hz, 1H), 3.11 (d, *J* = 13.7 Hz, 1H), 2.78 (d, *J* = 3.7 Hz, 1H), 2.71 – 2.49 (m, 2H), 2.42 (s, 3H), 2.12 (dd, *J* = 13.3, 6.4 Hz, 1H), 1.83 – 1.73 (m, 1H), 0.99 (t, *J* = 7.8 Hz, 9H),

0.85 – 0.78 (m, 6H);  $^{13}\text{C}$  NMR (100 MHz,  $\text{CDCl}_3$ )  $\delta$  147.2, 145.1, 144.1, 143.1, 103.7, 103.5, 101.2, 73.7, 72.2, 56.1, 54.9, 41.9, 37.2, 32.5, 7.7, 3.9 (two signals of quaternary aromatic carbons were not found due to low intensity); IR (KBr):  $\nu$  2956, 2872, 1607, 1473, 1290, 1242, 1156, 1036, 1006, 943, 863, 731  $\text{cm}^{-1}$ ; MS (ESI)  $m/z$  (%) 450.1 (38,  $[\text{M}+\text{H}]^+$ ), 448.1 (37,  $[\text{M}+\text{H}]^+$ ), 369.2 (25), 368.2 (100, M-Br); HRMS (ESI)  $m/z$  calcd for  $\text{C}_{22}\text{H}_{31}\text{BrNO}_2\text{Si}$   $[\text{M}+\text{H}]^+$  448.1302, found 448.1302.

## 4. Approach II: Boc protection of nitrogen

### 4.1 Synthesis of starting alkyne 8

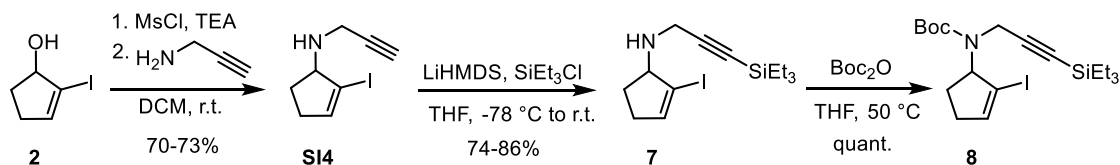

#### 2-Iodo-N-(prop-2-yn-1-yl)cyclopent-2-en-1-amine (SI4)

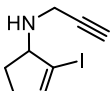
 Alcohol **2** (4.20 g, 20.02 mmol) is dissolved in DCM (54 mL) and cooled to 0 °C before Et<sub>3</sub>N (8.4 mL, 60.05 mmol) was added. Methanesulfonyl chloride (2.3 mL, 30.02 mmol) was added slowly and the resulting mixture was stirred for 2 h at 0 °C and then for 1.5 h at room temperature before being extracted between DCM (3 × 50 mL) and a saturated aqueous solution of NaHCO<sub>3</sub> (40 mL). Combined organic layers were dried over Na<sub>2</sub>SO<sub>4</sub>, filtered, concentrated under reduced pressure (100 mbar, 30 °C). Prop-2-yn-1-amine (4.8 mL, 60.05 mmol) was added to the crude mesylate at 0 °C under argon atmosphere. The reaction mixture was allowed to warm to room temperature and stirred for an additional 13 h. The crude was purified by column chromatography on silica gel (9/1 hexanes/EtOAc) to give the title compound as light brown oil (3.61 g, 73%). The reaction was repeated several times with the yields in the range of 70-73%.

<sup>1</sup>H NMR (400 MHz, CDCl<sub>3</sub>) δ 6.27 (td, *J* = 2.5, 1.5 Hz, 1H), 3.93 (dddd, *J* = 7.9, 4.4, 2.9, 1.5 Hz, 1H), 3.50 (dd, *J* = 16.9, 2.5 Hz, 1H), 3.37 (dd, *J* = 16.9, 2.5 Hz, 1H), 2.51 – 2.37 (m, 1H), 2.38 – 2.24 (m, 1H), 2.22 (t, *J* = 2.5 Hz, 1H), 2.25 – 2.12 (m, 1H), 1.82 (ddt, *J* = 13.1, 9.1, 5.1 Hz, 1H), 1.67 (bs, 1H). <sup>13</sup>C NMR (100 MHz, CDCl<sub>3</sub>) δ 142.2, 99.4, 82.2, 71.5, 68.5, 35.1, 33.2, 28.7; IR (KBr) ν 3297, 2923, 2845, 1607, 1455, 1329, 1159, 1114, 1042, 920, 815, 647 cm<sup>-1</sup>; MS (EI) *m/z* (%) 247.0 (72, M<sup>+</sup>), 246.0 (38), 208.0 (11), 193.0 (8), 127.9 (26), 120.1 (100, [M-I]<sup>+</sup>), 118.1 (44), 103.1 (19), 91.1 (37), 80.0 (46), 77.0 (32), 69.0 (32), 66.0 (48), 54.0 (10); HRMS (EI) *m/z* calcd for C<sub>8</sub>H<sub>10</sub>NI 246.9858, found 246.9859.

#### 2-Iodo-N-(3-(triethylsilyl)prop-2-yn-1-yl)cyclopent-2-en-1-amine (7)

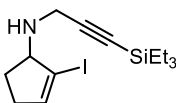
 Amine **SI4** (2.69 g, 10.88 mmol) was dissolved in dry THF (15 mL) under argon atmosphere and cooled to -78 °C. LiHMDS (13.1 mL of 1M solution in THF) was added and the mixture was stirred at the same temperature for 2 h before the addition of chlorotriethylsilane (2.2 mL, 13.05 mmol). The reaction was allowed to warm up to room

temperature and stirred for an additional 4 h before being quenched with a saturated aqueous solution of  $\text{NH}_4\text{Cl}$  (1 mL). The mixture was extracted with EtOAc ( $3 \times 40$  mL) and water (20 mL) and combined organic layers were dried over  $\text{Na}_2\text{SO}_4$ , filtered, concentrated under reduced pressure. The crude product was purified by column chromatography on silica gel (95/5 hexanes/EtOAc) to give the title compound as orange liquid (3.39 g, 86%). The reaction was repeated several times with the yields in the range of 74-86%. The compound is a little volatile under reduced pressure (10 mbar, 20 °C).

$^1\text{H NMR}$  (400 MHz,  $\text{CDCl}_3$ )  $\delta$  6.25 (td,  $J = 2.5, 1.5$  Hz, 1H), 3.94 (dddt,  $J = 7.7, 4.5, 2.9, 1.5$  Hz, 1H), 3.52 (d,  $J = 17.2$  Hz, 1H), 3.39 (d,  $J = 17.2$  Hz, 1H), 2.48 – 2.37 (m, 1H), 2.35 – 2.24 (m, 1H), 2.21 – 2.11 (m, 1H), 1.83 (ddt,  $J = 13.1, 9.0, 4.9$  Hz, 1H), 1.60 (bs, 1H), 0.99 (t,  $J = 7.9$  Hz, 9H), 0.59 (q,  $J = 7.8$  Hz, 6H);  $^{13}\text{C NMR}$  (100 MHz,  $\text{CDCl}_3$ )  $\delta$  142.1, 105.6, 99.6, 85.4, 68.5, 36.4, 33.2, 28.8, 7.6, 4.5; **IR** (KBr)  $\nu$  3306, 2953, 2878, 2167, 1604, 1458, 1323, 1237, 1108, 1018, 985, 728  $\text{cm}^{-1}$ ; **MS** (CI)  $m/z$  (%) 362.1 (41,  $\text{M}^+$ ), 332.0 (100), 246.0 (12), 234.2 (42), 222.0 (41), 208.0 (24), 193.0 (12), 170.1 (97), 118.1 (7), 87.1 (11); **HRMS** (CI)  $m/z$  calcd for  $\text{C}_{14}\text{H}_{25}\text{NSi}$  362.0801, found 362.0799.

#### *tert*-Butyl (*S*)-(2-iodocyclopent-2-en-1-yl)(3-(triethylsilyl)prop-2-yn-1-yl)carbamate (**8**)

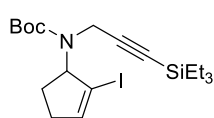

The title compound was prepared using the procedure reported earlier<sup>[2]</sup> and obtained in a quantitative yield as a light yellow oil. The recorded spectra were in agreement with those already reported.<sup>[2]</sup>

#### 4.2. Synthesis of polycyclic compounds

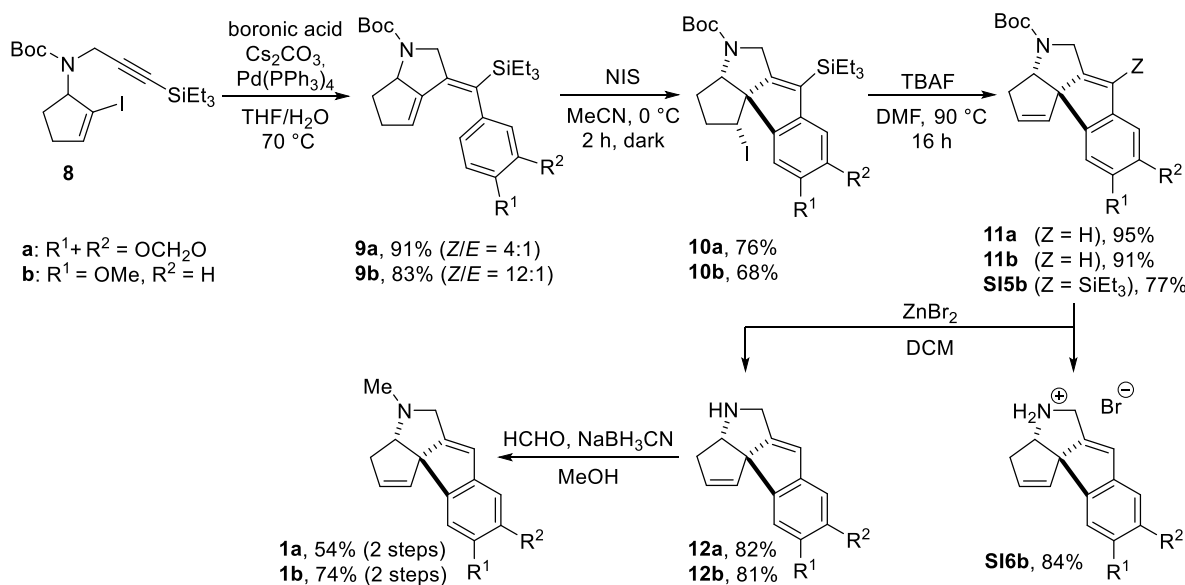

Table S2. Optimisation of conditions for Boc cleavage

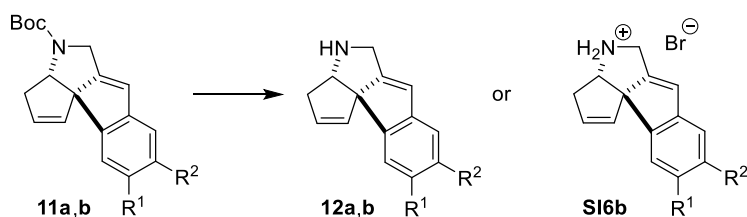a: R<sup>1</sup>+R<sup>2</sup> = OCH<sub>2</sub>Ob: R<sup>1</sup> = OMe, R<sup>2</sup> = H

| Entry | Substrate                | Reagent <sup>a)</sup>             | Eq. | Solvent           | Temp.                | Time (h) | Product, yield (%) <sup>b)</sup>                                  | Observation                    |
|-------|--------------------------|-----------------------------------|-----|-------------------|----------------------|----------|-------------------------------------------------------------------|--------------------------------|
| 1     | <b>11a</b>               | TFA                               | 10  | DCM               | r.t.                 | 2.5      | <b>12a</b> , 0                                                    | decomposition                  |
| 2     | <b>11a</b>               | H <sub>3</sub> PO <sub>4</sub>    | 4   | DCM               | r.t.                 | 72       | <b>12a</b> , 0                                                    | <b>11a</b> , side prod.        |
| 3     | <b>11a</b>               | H <sub>3</sub> PO <sub>4</sub>    | 20  | THF               | r.t.                 | 72       | <b>12a</b> , 0                                                    | <b>11a</b> , 10%               |
| 4     | <b>11a</b>               | HCl <sup>c)</sup>                 | 30  | dioxane           | r.t.                 | 1        | <b>12a</b> , 0                                                    | complex mixture                |
| 5     | <b>11a</b>               | HCl <sup>d)</sup>                 | 30  | ether             | r.t.                 | 1        | <b>12a</b> , 0                                                    | complex mixture                |
| 6     | <b>11a</b>               | ---                               | --- | H <sub>2</sub> O  | 100 °C               | 1        | <b>12a</b> , 0                                                    | <b>11a</b> , <sup>e)</sup> 13% |
| 7     | <b>11a</b>               | ---                               | --- | DMSO              | 140 °C               | 2        | <b>12a</b> , 0                                                    | <b>11a</b> , side prod.        |
| 8     | <b>11a</b>               | TMSI                              | 1.2 | CHCl <sub>3</sub> | r.t.                 | 0.5      | <b>12a</b> , 0                                                    | complex mixture                |
| 9     | <b>11a</b>               | I <sub>2</sub>                    | 0.1 | DCM               | r.t.                 | 19       | <b>12a</b> , 0                                                    | side prod.                     |
| 10    | <b>11a</b>               | AlCl <sub>3</sub>                 | 1   | DCM               | r.t.                 | 3        | <b>12a</b> , 0                                                    | side prod.                     |
| 11    | <b>11b</b>               | BF <sub>3</sub> .OEt <sub>2</sub> | 1.4 | DCM               | r.t.                 | 0.5      | <b>12b</b> , 0                                                    | side prod.                     |
| 12    | <b>11b</b>               | ---                               | --- | HFIP              | 150 °C <sup>f)</sup> | 2        | <b>12b</b> , 0                                                    | side prod.                     |
| 13    | <b>11b</b>               | ---                               | --- | HFIP              | 100 °C <sup>f)</sup> | 5        | <b>12b</b> , 0                                                    | side prod.                     |
| 14    | <b>11b</b>               | ZnCl <sub>2</sub>                 | 5   | DCM               | r.t.                 | 26       | <b>12b</b> , 37                                                   | ---                            |
| 15    | <b>11a</b>               | ZnBr <sub>2</sub>                 | 5   | DMF               | r.t.                 | 17       | <b>12a</b> , 0                                                    | <b>11a</b> , 65%               |
| 16    | <b>11a</b>               | ZnBr <sub>2</sub>                 | 5   | MeOH              | r.t.                 | 19       | <b>12a</b> , 0                                                    | <b>11a</b> , 39%               |
| 17    | <b>11a</b>               | ZnBr <sub>2</sub> <sup>g)</sup>   | 2.2 | DCM               | r.t.                 | 22       | <b>12a</b> , 5                                                    | ---                            |
| 18    | <b>11a</b> <sup>h)</sup> | ZnBr <sub>2</sub>                 | 5   | DCM               | r.t.                 | 18       | <b>12a</b> , 46                                                   | ---                            |
| 19    | <b>11a</b> <sup>i)</sup> | ZnBr <sub>2</sub>                 | 5   | DCM               | r.t.                 | 18       | <b>12a</b> , 75 (61) <sup>j)</sup>                                | ---                            |
| 20    | <b>11b</b>               | ZnBr <sub>2</sub>                 | 5   | DCM               | r.t.                 | 22       | <b>SI6b</b> , 84 <sup>k)</sup><br><b>12b</b> , (42) <sup>j)</sup> | ---                            |
| 21    | <b>11b</b>               | ZnBr <sub>2</sub>                 | 5   | DCM               | r.t.                 | 19       | <b>12b</b> , 81 <sup>l)</sup> (39) <sup>j)</sup>                  | ---                            |

<sup>a)</sup> Zinc salts were vacuum-dried at 140 °C for 4 h prior to reaction. <sup>b)</sup> <sup>1</sup>H NMR yield. Mesitylene was used as an internal standard. Isolated yields in brackets. <sup>c)</sup> 4M HCl in dioxane. <sup>d)</sup> 4M HCl in dry dioxane. <sup>e)</sup> Starting material did not dissolve. <sup>f)</sup> Microwave irradiation. <sup>g)</sup> Not dried prior to reaction. <sup>h)</sup> Solid **11a** was added to the reaction mixture. <sup>i)</sup> **11a** was added as a solution in DCM. <sup>j)</sup> Isolated yield after column chromatography on neutralised SiO<sub>2</sub>. <sup>k)</sup> Filtration work-up. <sup>l)</sup> Extraction work-up.

Table S3. Boc cleavage/methylation sequence optimisation

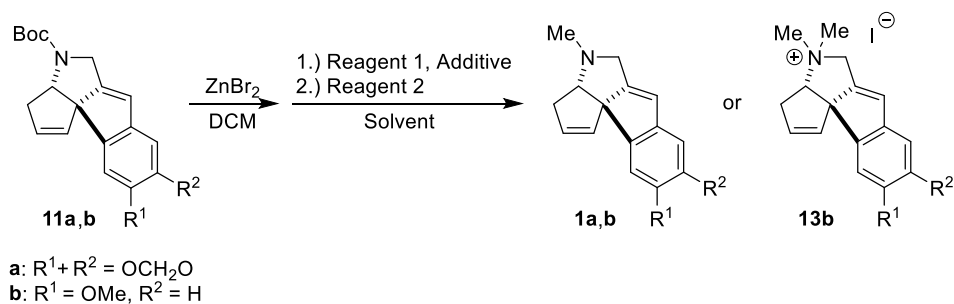

| Entry | Substrate  | Reagent 1 (eq.) | Reagent 2 (eq.)          | Additive (eq.)          | Solvent | Overall Yield <sup>a)</sup> (%) |
|-------|------------|-----------------|--------------------------|-------------------------|---------|---------------------------------|
| 1     | <b>11b</b> | HCHO (1)        | NaBH <sub>3</sub> CN (1) | --                      | MeCN    | <b>1b</b> , 44                  |
| 2     | <b>11b</b> | HCHO (5)        | NaBH <sub>3</sub> CN (1) | ZnCl <sub>2</sub> (0.4) | MeOH    | <b>1b</b> , 74                  |
| 3     | <b>11b</b> | LiHMDS (2)      | MeI (3)                  | --                      | THF     | <b>1b</b> , 0 <sup>b)</sup>     |
| 4     | <b>11b</b> | HCHO (2.2)      | HCOOH (5)                | --                      | --      | <b>1b</b> , 0                   |
| 5     | <b>11a</b> | HCHO (1)        | NaBH <sub>3</sub> CN (3) | --                      | MeCN    | <b>1a</b> , 28 <sup>c)</sup>    |
| 6     | <b>11a</b> | HCHO (5)        | NaBH <sub>3</sub> CN (2) | ZnCl <sub>2</sub> (0.4) | MeOH    | <b>1a</b> , 21                  |
| 7     | <b>11a</b> | HCHO (5)        | NaBH <sub>3</sub> CN (3) | --                      | MeOH    | <b>1a</b> , 54                  |
| 8     | <b>11a</b> | HCHO (9)        | NaBH <sub>3</sub> CN (3) | --                      | MeOH    | <b>1a</b> , 24                  |

Dried ZnBr<sub>2</sub> (5 eq.) in dry DCM was always used. The reaction was performed at r.t. for 17-21 h, followed by a basic extraction work-up. <sup>a)</sup> Isolated yield. <sup>b)</sup> The quaternary salt (**13b**) was isolated in 18% yield. <sup>c)</sup> <sup>1</sup>H NMR yield. Mesitylene was used as an internal standard.

Table S4. Optimisation of the elimination/desilylation method

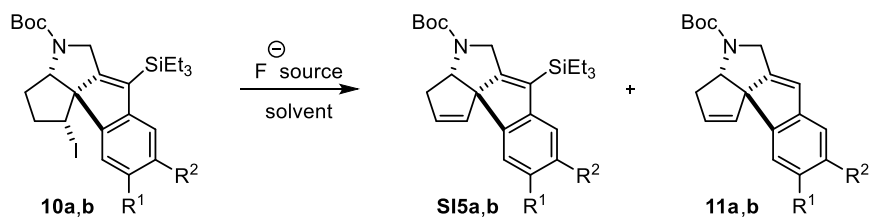

a:  $R^1 + R^2 = OCH_2O$   
 b:  $R^1 = OMe, R^2 = H$

| Entry | Substrate  | Scale (mmol) | $F^-$ source (eq.) | Solvent | Temp. ( $^{\circ}C$ ) | Time   | Yield of <b>SI5</b> (%)       | Yield of <b>11</b> (%) |
|-------|------------|--------------|--------------------|---------|-----------------------|--------|-------------------------------|------------------------|
| 1     | <b>10b</b> | 0.06         | TBAF (4)           | THF     | 20                    | 4 days | <b>SI5b</b> , 72              | <b>11b</b> , 0         |
| 2     | <b>10b</b> | 0.07         | TBAF (4)           | THF     | 70                    | 5 h    | <b>SI5b</b> , 79              | <b>11b</b> , 0         |
| 3     | <b>10b</b> | 0.04         | TBAF (4)           | THF     | 70                    | 3 days | <b>SI5b</b> , 85              | <b>11b</b> , 7         |
| 4     | <b>10b</b> | 0.03         | KF (2.2)           | DMF     | 70                    | 3 days | <b>SI5b</b> , 0 <sup>a)</sup> | <b>11b</b> , 0         |
| 5     | <b>10b</b> | 0.04         | TBAF (4)           | DMF     | 75                    | 7 h    | <b>SI5b</b> , 0               | <b>11b</b> , 52        |
| 6     | <b>10b</b> | 0.14         | TBAF (4)           | DMF     | 80                    | 16 h   | <b>SI5b</b> , 0               | <b>11b</b> , 57        |
| 7     | <b>10b</b> | 0.02         | TBAF (4)           | DMF     | 90                    | 9 h    | <b>SI5b</b> , 0               | <b>11b</b> , 76        |
| 8     | <b>10b</b> | 0.03         | TBAF (4)           | DMF     | 95                    | 16 h   | <b>SI5b</b> , 0               | <b>11b</b> , 85        |
| 9     | <b>10b</b> | 0.13         | TBAF (4)           | DMF     | 95                    | 16 h   | <b>SI5b</b> , 0               | <b>11b</b> , 91        |
| 10    | <b>10a</b> | 0.07         | TBAF (4)           | THF     | 70                    | 20 h   | <b>SI5a</b> , 0 <sup>b)</sup> | <b>11a</b> , 98        |
| 11    | <b>10a</b> | 1.03         | TBAF (4)           | THF     | 70                    | 3 days | <b>SI5a</b> , 0               | <b>11a</b> , 98        |
| 12    | <b>10a</b> | 0.45         | TBAF (4)           | DMF     | 95                    | 2 h    | <b>SI5a</b> , 0               | <b>11a</b> , 95        |

<sup>a)</sup> Starting material was partially regenerated (34%). <sup>b)</sup> The compound was not fully characterised.

***tert*-Butyl 3-(benzo[*d*][1,3]dioxol-5-yl(triethylsilyl)methylene)-3,5,6,6a-tetrahydrocyclopenta[*b*]pyrrole-1(2*H*)-carboxylate (9a)**

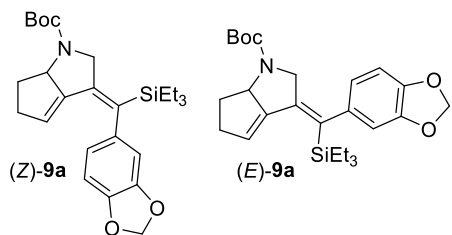

The title compound was prepared using a modified procedure reported earlier.<sup>[2]</sup> Compound **8** (692 mg, 1.50 mmol) was dissolved in a mixture of THF (22.5 mL) and water (2.3 mL), then 3,4-(methylenedioxy)phenylboronic acid (498 mg, 3.00 mmol) and caesium carbonate (1086 mg, 3.30 mmol) were added. The mixture was degassed by evacuation and backfilling with argon (2x), then Pd(PPh<sub>3</sub>)<sub>4</sub> (88 mg, 0.075 mmol) was added and the degassing procedure was repeated again. The mixture was warmed to 75 °C and stirred at this temperature for 18 h. Then it was allowed to cool to room temperature and extracted between EtOAc (3 × 80 mL) and brine (50 mL). Combined organic layers were dried over Na<sub>2</sub>SO<sub>4</sub>, filtered and concentrated under reduced pressure. The crude product was purified by column chromatography on silica gel (gradient elution: 99/1 → 95/5 hexanes/EtOAc) to provide the title compound (546 mg, 80%) in ratio of *Z/E* isomers 80/20 from which (*Z*)-**9a** (379 mg, 55%) and (*E*)-**9a** (7 mg, 1%) were isolated in pure form. The reaction was successfully scaled up to gram scale (1.63 g of **8**, 77%).

(*Z*)-**9a**: Colorless foam. <sup>1</sup>H NMR (400 MHz, CDCl<sub>3</sub>) δ 6.74 (d, *J* = 7.9 Hz, 1H), 6.53 – 6.26 (m, 2H), 5.92 (s, 2H), 4.75 (s, 1H), 4.48 (d, *J* = 15.8 Hz, 1H), 4.43 – 4.33 (m, 1H), 4.34 (d, *J* = 15.9 Hz, 1H), 2.54 – 2.22 (m, 3H), 1.74 – 1.57 (m, 1H), 1.46 (s, 9H), 0.89 (t, *J* = 7.9 Hz, 9H), 0.66 – 0.50 (m, 6H). Other spectral data were in agreement with those already reported.<sup>[2]</sup>

(*E*)-**9a**: Colorless foam; <sup>1</sup>H NMR (400 MHz, CDCl<sub>3</sub>) δ 6.71 (d, *J* = 7.7 Hz, 1H), 6.39 (d, *J* = 1.7 Hz, 1H), 6.32 (dd, *J* = 7.8, 1.7 Hz, 1H), 6.01 (dt, *J* = 4.4, 2.3 Hz, 1H), 5.92 (s, 2H), 4.61 – 4.52 (m, 1H), 3.99 (d, *J* = 16.6 Hz, 1H), 3.91 (d, *J* = 16.6 Hz, 1H), 2.77 – 2.40 (m, 3H), 1.86 – 1.71 (m, 1H), 1.41 (s, 9H), 0.87 (t, *J* = 7.9 Hz, 9H), 0.70 – 0.51 (m, 6H); <sup>13</sup>C NMR (100 MHz, CDCl<sub>3</sub>) δ 155.0, 147.6, 145.5, 145.4, 141.7, 138.2, 137.1, 127.1, 119.8, 108.5, 107.8, 100.9, 79.4, 69.1, 56.4, 36.8, 35.8, 28.6, 7.7, 3.8; IR (KBr) ν 2950, 2875, 1700, 1365, 1338, 1237, 1177, 1120, 1039, 1000, 937, 731 cm<sup>-1</sup>; MS (ESI) *m/z* (%) 933.6 (18, [2M+Na]<sup>+</sup>), 478.3 (100, [M+Na]<sup>+</sup>), 410.1 (5), 400.2 (13), 454.3 (9), 398.2 (4); HRMS (ESI) *m/z* calcd for C<sub>26</sub>H<sub>37</sub>O<sub>4</sub>NNaSi 478.2384, found 478.2381.

***tert*-Butyl 3-((4-methoxyphenyl)(triethylsilyl)methylene)-3,5,6,6a-tetrahydrocyclopenta[*b*]pyrrole-1(2*H*)-carboxylate (9b)**

Compound **8** (1.13 g, 2.46 mmol) was dissolved in a mixture of THF (32 mL) and water (3.2 mL), then 4-methoxyphenylboronic acid (0.71 g, 4.92 mmol) and caesium carbonate (1.78 g, 5.41 mmol) were added. The mixture was degassed by evacuation and backfilling with argon (2x), then Pd(PPh<sub>3</sub>)<sub>4</sub> (143 mg, 0.12



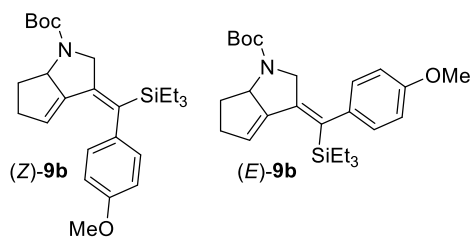

mmol) was added and the degassing procedure was repeated again. The resulting mixture was heated to 70 °C and stirred at this temperature 23 h before being allowed to cool to room temperature and extracted between EtOAc (3 × 50 mL) and brine (20 mL). Combined organic layers were dried over Na<sub>2</sub>SO<sub>4</sub>, filtered and concentrated under reduced pressure. The crude product was purified by column chromatography on silica gel (95/5 hexanes/EtOAc) to provide the title compound (0.96g, 89%) in ratio of *Z/E* isomers 87/13 from which (*Z*)-**9b** (0.83 g, 85%) and (*E*)-**9b** (65 mg, 7%) were isolated in pure form.

(*Z*)-**9b**: White crystalline solid, **m.p.** = 177.7 °C (recrystallized from Et<sub>2</sub>O/hexanes); **<sup>1</sup>H NMR** (400 MHz, CDCl<sub>3</sub>) δ 6.90 – 6.80 (m, 4H), 4.62 – 4.58 (m, 1H), 4.56 – 4.32 (m, 3H), 3.80 (s, 3H), 2.50 – 2.22 (m, 3H), 1.71 – 1.59 (m, 1H), 1.47 (s, 9H), 0.90 (t, *J* = 7.9 Hz, 9H), 0.66 – 0.51 (m, 6H); **<sup>13</sup>C NMR** (100 MHz, CDCl<sub>3</sub>) δ 157.7, 155.4, 146.4, 140.4, 137.3, 136.9, 128.3, 127.0, 113.5, 79.6, 68.3, 56.5, 55.3, 36.1, 36.0, 28.6, 7.6, 3.6.; **IR** (KBr) ν 2947, 2875, 2836, 1706, 1607, 1509, 1392, 1278, 1242, 1171, 1120, 1030, 1006, 911, 722 cm<sup>-1</sup>; **MS** (ESI) *m/z* (%) 905.6 (30, [2M+Na]<sup>+</sup>), 464.3 (100, [M+Na]<sup>+</sup>), 386.2 (4); **HRMS** (ESI) *m/z* calcd for C<sub>26</sub>H<sub>39</sub>O<sub>3</sub>NNaSi 464.2591, found 464.2589.

(*E*)-**9b**: Light yellow amorphous solid; **<sup>1</sup>H NMR** (400 MHz, CDCl<sub>3</sub>) δ 6.88 – 6.73 (m, 4H), 6.04 – 5.97 (m, 1H), 4.61 – 4.51 (m, 1H), 3.96 (d, *J* = 16.6 Hz, 1H), 3.86 (d, *J* = 16.6 Hz, 1H), 3.79 (s, 3H), 2.79 – 2.41 (m, 3H), 1.85 – 1.71 (m, 1H), 1.40 (s, 9H), 0.86 (t, *J* = 7.8 Hz, 9H), 0.67 – 0.51 (m, 6H); **<sup>13</sup>C NMR** (100 MHz, CDCl<sub>3</sub>) δ 157.7, 155.0, 145.5, 141.5, 137.0, 136.7, 128.0, 126.9, 114.0, 79.3, 69.1, 56.5, 55.3, 36.8, 35.8, 28.6, 7.7, 3.9; **IR** (KBr) ν 2947, 2869, 1697, 1673, 1610, 1512, 1395, 1278, 1245, 1180, 1033, 1003, 973, 728 cm<sup>-1</sup>; **MS** (ESI) *m/z* (%) 905.6 (10, [2M+Na]<sup>+</sup>), 464.3(100, [M+Na]<sup>+</sup>), 412.2 (2), 386.2 (14); **HRMS** (ESI) *m/z* calcd for C<sub>26</sub>H<sub>40</sub>O<sub>3</sub>NSi 442.2772, found 442.2766.

### ***tert*-Butyl 1-iodo-6-(triethylsilyl)-1,2,3,3a-tetrahydro-[1,3]dioxolo[4',5':5,6]indeno[1,2-*c*]cyclopenta[*b*]pyrrole-4(5*H*)-carboxylate (10a)**

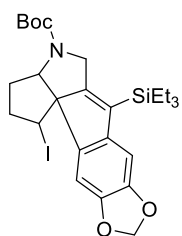

The title compound was prepared using a modified procedure reported earlier.<sup>[2]</sup> Compound **9a** (274 mg, 0.60 mmol) was dissolved in dry MeCN (12 mL) under argon atmosphere. The solution was cooled to 0 °C, covered with aluminium foil and then *N*-iodosuccinimide (162 mg, 0.72 mmol) was added. The reaction mixture was stirred at 0 °C for 1 h before being extracted between brine (25 mL) and EtOAc (3 × 40 mL). Combined organic layers were dried over Na<sub>2</sub>SO<sub>4</sub>, filtered and concentrated under reduced pressure. The crude product was purified by column chromatography on silica gel (95/5 hexanes/EtOAc) to give the

title compound (265 mg, 76%) as a light yellow solid. The reaction was repeated several times with the yields in the range of 74-76%. The recorded spectra were in agreement with those already reported.<sup>[2]</sup>

<sup>1</sup>H NMR (400 MHz, CDCl<sub>3</sub>, mixture of rotamers, signals of both rotamers are listed) δ 6.84 (s, 1H), 6.82 (s, 1H<sup>#</sup>), 6.69 (s, 1H<sup>#</sup>), 6.68 (s, 1H), 5.96 – 5.93 (m, 2H, 2H<sup>#</sup>), 4.36 (dd, *J* = 11.7, 6.8 Hz, 1H), 4.35 (dd, *J* = 11.9, 7.0 Hz, 1H<sup>#</sup>), 4.29 (d, *J* = 13.7 Hz, 1H), 4.20 (d, *J* = 13.5 Hz, 1H<sup>#</sup>), 4.06 (d, *J* = 13.7 Hz, 1H), 4.05 (d, *J* = 13.5 Hz, 1H<sup>#</sup>), 3.87 (d, *J* = 3.8 Hz, 1H<sup>#</sup>), 3.80 (d, *J* = 3.8 Hz, 1H), 2.53 – 2.27 (m, 3H, 3H<sup>#</sup>), 1.87 – 1.75 (m, 2H), 1.45 (s, 9H<sup>#</sup>), 1.44 (s, 9H), 1.03 – 0.97 (m, 9H, 9H<sup>#</sup>), 0.88 – 0.79 (m, 6H, 6H<sup>#</sup>); <sup>13</sup>C NMR (100 MHz, CDCl<sub>3</sub>, mixture of rotamers, signals of both rotamers are listed) δ 163.8<sup>#</sup>, 163.6, 153.5 (1C, 1C<sup>#</sup>), 147.52<sup>#</sup>, 147.50, 145.6<sup>#</sup>, 145.5, 143.8, 143.5<sup>#</sup>, 141.6<sup>#</sup>, 141.5, 134.1, 133.9<sup>#</sup>, 103.84, 103.80<sup>#</sup>, 103.74<sup>#</sup>, 103.68, 101.4 (1C, 1C<sup>#</sup>), 80.1, 79.9<sup>#</sup>, 71.9, 71.2<sup>#</sup>, 63.62, 63.56<sup>#</sup>, 48.1<sup>#</sup>, 47.8, 38.3<sup>#</sup>, 38.0, 36.0, 35.0<sup>#</sup>, 31.3<sup>#</sup>, 31.1, 28.6 (1C, 1C<sup>#</sup>), 7.7 (1C, 1C<sup>#</sup>), 4.1 (1C, 1C<sup>#</sup>) (<sup>#</sup>rotamer signals – the signals are in pairs but could not be assigned to the particular rotamer, lower intensity signal of the pair is always marked by <sup>#</sup>)

***tert*-Butyl 1-iodo-9-methoxy-6-(triethylsilyl)-1,2,3,3a-tetrahydrocyclopenta[*b*]indeno[1,2-*c*]pyrrole-4(5*H*)-carboxylate (10b)**

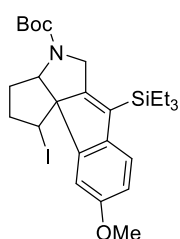

Alkene **9b** (35 mg, 0.08 mmol) was dissolved in dry MeCN (1.6 mL) under an argon atmosphere. The solution was cooled to 0 °C and covered with aluminium foil before *N*-iodosuccinimide (21 mg, 0.10 mmol) was added in one portion. The reaction mixture was stirred at 0 °C for 1 h before being extracted with EtOAc (3 × 20 mL) and brine (15 mL).

Combined organic layers were dried over Na<sub>2</sub>SO<sub>4</sub>, filtered and concentrated under reduced pressure. The crude product was purified by column chromatography on silica gel (95/5 hexanes/EtOAc) to give the title compound as a transparent crystalline solid (31 mg, 68%), **m.p.** = 148.2 °C (recrystallized from EtOAc). The reaction was repeated several times with the yields in the range of 62-68% and was successfully scaled up (0.91 g, 62%).

<sup>1</sup>H NMR (400 MHz, CDCl<sub>3</sub>, mixture of rotamers, signals of both rotamers are listed) δ 7.24 – 7.19 (m, 1H, 1H<sup>#</sup>), 6.78 – 6.74 (m, 2H, 2H<sup>#</sup>), 4.41 (dd, *J* = 6.7, 5.1 Hz, 1H<sup>#</sup>), 4.38 (dd, *J* = 6.7, 5.1 Hz, 1H), 4.31 (d, *J* = 13.6 Hz, 1H), 4.23 (d, *J* = 13.4 Hz, 1H<sup>#</sup>), 4.07 (d, *J* = 13.6 Hz, 1H), 4.06 (d, *J* = 13.4 Hz, 1H<sup>#</sup>), 3.90 (d, *J* = 3.8 Hz, 1H<sup>#</sup>), 3.83 (d, *J* = 3.7 Hz, 1H), 3.80 (s, 3H), 3.80 (s, 3H<sup>#</sup>), 2.55 – 2.29 (m, 3H, 3H<sup>#</sup>), 1.91 – 1.78 (m, 1H, 1H<sup>#</sup>), 1.45 (s, 9H<sup>#</sup>), 1.44 (s, 9H), 1.04 – 0.97 (m, 9H, 9H<sup>#</sup>), 0.89 – 0.81 (m, 6H, 6H<sup>#</sup>); <sup>13</sup>C NMR (100 MHz, CDCl<sub>3</sub>, mixture of rotamers, signals of both rotamers are listed) δ 162.5<sup>#</sup>, 162.3, 157.9<sup>#</sup>, 157.8, 153.6 (1C, 1C<sup>#</sup>), 149.9<sup>#</sup>, 149.8, 143.1, 142.8<sup>#</sup>, 134.0, 133.7<sup>#</sup>, 122.73, 122.65<sup>#</sup>, 112.0 (1C, 1C<sup>#</sup>), 109.73<sup>#</sup>, 109.65, 80.0, 79.9<sup>#</sup>, 72.2, 71.4<sup>#</sup>, 63.6, 63.5<sup>#</sup>, 55.7 (1C, 1C<sup>#</sup>), 48.2<sup>#</sup>, 47.9, 38.5<sup>#</sup>, 38.2,

36.1, 35.1<sup>#</sup>, 32.0<sup>#</sup>, 31.8, 28.6 (1C, 1C<sup>#</sup>), 7.7 (1C, 1C<sup>#</sup>), 4.1 (1C, 1C<sup>#</sup>) (<sup>#</sup>rotamer signals – the signals are in pairs but could not be assigned to the particular rotamer, lower intensity signal of the pair is always marked by <sup>#</sup>); **IR** (KBr)  $\nu$  2959, 2866, 2839, 1679, 1619, 1580, 1392, 1245, 1210, 1180, 1105, 1045, 997, 875, 743, 695  $\text{cm}^{-1}$ ; **MS** (ESI)  $m/z$  (%) 1157.4 (30, [2M+Na]<sup>+</sup>), 590.2 (100, [M+Na]<sup>+</sup>), 512.1 (22), 462.3 (82), 440.3 (4), 270.1 (7); **HRMS** (ESI)  $m/z$  calcd for C<sub>26</sub>H<sub>38</sub>O<sub>3</sub>NINaSi 590.1558, found 590.1552.

**tert-Butyl 3,3a-dihydro-[1,3]dioxolo[4',5':5,6]indeno[1,2-c]cyclopenta[b]pyrrole-4(5H)-carboxylate (11a)**

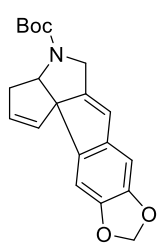

Compound **10a** (45 mg, 0.08 mmol) was dissolved in dry DMF (0.7 mL) and then TBAF (0.3 mL of 1M solution in THF, 0.31 mmol) was added. The reaction mixture was heated to 90 °C and stirred for 2.5 h. Then it was cooled to room temperature, diluted with Et<sub>2</sub>O (35 mL) and washed with water (3 × 10 mL). The organic phase was dried over Na<sub>2</sub>SO<sub>4</sub>, filtered and concentrated under reduced pressure. The crude product was purified by column chromatography on silica gel (gradient elution: 100/0 → 98/2 hexanes/EtOAc) to provide the title compound as a light yellow foam (25 mg, 96%). The reaction was repeated several times with the yields in the range of 90-96%.

<sup>1</sup>H NMR (400 MHz, CDCl<sub>3</sub>, mixture of rotamers, signals of both rotamers are listed)  $\delta$  6.77 (s, 1H), 6.76 (s, 1H<sup>#</sup>), 6.63 (d, 1H<sup>#</sup>), 6.62 (s, 1H), 6.44 – 6.40 (m, 1H, 1H<sup>#</sup>), 6.09 – 6.02 (m, 1H, 1H<sup>#</sup>), 5.95 – 5.91 (m, 2H, 2H<sup>#</sup>), 5.34 – 5.28 (m, 1H, 1H<sup>#</sup>), 4.22 (d,  $J = 13.2$  Hz, 1H), 4.11 (d,  $J = 13.2$  Hz, 1H<sup>#</sup>), 4.02 – 3.88 (m, 2H, 2H<sup>#</sup>), 3.00 – 2.76 (m, 2H, 2H<sup>#</sup>), 1.46 (s, 9H<sup>#</sup>), 1.45 (s, 9H); <sup>13</sup>C NMR (100 MHz, CDCl<sub>3</sub>, mixture of rotamers, signals of both rotamers are listed)  $\delta$  154.21, 154.16<sup>#</sup>, 151.0<sup>#</sup>, 150.8, 147.51, 147.48<sup>#</sup>, 145.8<sup>#</sup>, 145.7, 140.5<sup>#</sup>, 140.4, 139.4, 139.3<sup>#</sup>, 133.5<sup>#</sup>, 133.0, 132.6, 132.3<sup>#</sup>, 123.7, 123.6<sup>#</sup>, 105.4<sup>#</sup>, 105.3, 102.8, 102.6<sup>#</sup>, 101.2 (1C, 1C<sup>#</sup>), 79.8, 79.6<sup>#</sup>, 75.2, 74.5<sup>#</sup>, 63.0, 62.8<sup>#</sup>, 45.4<sup>#</sup>, 44.9, 42.0, 40.9<sup>#</sup>, 28.7 (1C, 1C<sup>#</sup>) (<sup>#</sup>rotamer signals – the signals are in pairs but could not be assigned to the particular rotamer, lower intensity signal of the pair is always marked by <sup>#</sup>); **IR** (KBr)  $\nu$  2971, 2926, 1688, 1470, 1389, 1308, 1269, 1163, 1102, 1036, 943, 866, 782, 731  $\text{cm}^{-1}$ ; **MS** (ESI)  $m/z$  (%) 701.3 (28, [2M+Na]<sup>+</sup>), 362.1 (100, [M+Na]<sup>+</sup>), 340.1 (5, [M+H]<sup>+</sup>), 300.1 (6), 284.1 (44); **HRMS** (ESI)  $m/z$  calcd for C<sub>20</sub>H<sub>21</sub>O<sub>4</sub>NNa 362.1363, found 362.1362.

**tert-Butyl 9-methoxy-6-(triethylsilyl)-3,3a-dihydrocyclopenta[b]indeno[1,2-c]pyrrole-4(5H)-carboxylate (SI5b)**

Compound **10b** (38 mg, 0.07 mmol) was dissolved in dry THF (0.7 mL) under argon atmosphere and then TBAF (0.26 mL of 1M solution in THF, 0.26 mmol) was added. The reaction mixture was warmed to

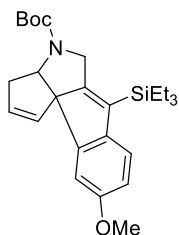

70 °C and stirred for 5 h before cooling down and extracted with EtOAc (3 × 20 mL) and water (20 mL). Combined organic layers were dried over Na<sub>2</sub>SO<sub>4</sub>, filtered and concentrated under reduced pressure. The crude product was purified by column chromatography on silica gel (95/5 hexanes/EtOAc) to give the title compound as an orange amorphous solid (22 mg, 77%). The product is sensitive to acids.

**<sup>1</sup>H NMR** (400 MHz, CDCl<sub>3</sub>, mixture of rotamers, signals of both rotamers are listed) δ 7.26 (d, *J* = 8.3 Hz, 1H), 7.25 (d, *J* = 8.5 Hz, 1H<sup>#</sup>), 6.77 (dd, *J* = 8.4, 2.5 Hz, 1H), 6.77 (dd, *J* = 8.5, 2.4 Hz, 1H<sup>#</sup>), 6.71 (d, *J* = 2.5 Hz, 1H<sup>#</sup>), 6.69 (d, *J* = 2.5 Hz, 1H), 6.08 – 6.04 (m, 1H<sup>#</sup>), 6.04 – 6.00 (m, 1H), 5.31 – 5.26 (m, 1H, 1H<sup>#</sup>), 4.29 (d, *J* = 13.6 Hz, 1H), 4.21 (d, *J* = 13.5 Hz, 1H<sup>#</sup>), 4.08 – 3.94 (m, 2H, 2H<sup>#</sup>), 3.78 (s, 3H, 3H<sup>#</sup>), 3.02 – 2.78 (m, 2H, 2H<sup>#</sup>), 1.46 (s, 9H, 9H<sup>#</sup>), 1.03 – 0.92 (m, 9H, 9H<sup>#</sup>), 0.90 – 0.78 (m, 6H, 6H<sup>#</sup>); **<sup>13</sup>C NMR** (100 MHz, CDCl<sub>3</sub>, mixture of rotamers, signals of both rotamers are listed) δ 161.0<sup>#</sup>, 160.7, 157.7<sup>#</sup>, 157.6, 154.29<sup>#</sup>, 154.25, 148.6<sup>#</sup>, 148.5, 143.1, 142.9<sup>#</sup>, 134.0, 133.5<sup>#</sup>, 133.1<sup>#</sup>, 132.4, 131.9, 131.7<sup>#</sup>, 122.7, 122.6<sup>#</sup>, 112.4 (1C, 1C<sup>#</sup>), 110.5<sup>#</sup>, 110.3, 79.7, 79.6<sup>#</sup>, 77.4, 76.7<sup>#</sup>, 62.33, 62.27<sup>#</sup>, 55.7 (1C, 1C<sup>#</sup>), 46.2<sup>#</sup>, 45.9, 42.1, 41.2<sup>#</sup>, 28.7 (1C, 1C<sup>#</sup>), 7.6 (1C, 1C<sup>#</sup>), 3.99<sup>#</sup>, 3.95 (rotamer signals – the signals are in pairs but could not be assigned to the particular rotamer, lower intensity signal of the pair is always marked by <sup>#</sup>); **IR** (KBr) ν 3059, 2954, 2912, 2873, 1699, 1604, 1577, 1466, 1387, 1365, 1284, 1165, 1101, 1034, 1001, 744 cm<sup>-1</sup>; **MS** (ESI) *m/z* (%) 440.3 (11, [M+H]<sup>+</sup>), 385.2 (15), 384.2 (100), 286.1 (12); **HRMS** (ESI) *m/z* calcd for C<sub>26</sub>H<sub>38</sub>O<sub>3</sub>NSi 440.2616, found 440.2611.

#### **tert-Butyl 9-methoxy-3,3a-dihydrocyclopenta[b]indeno[1,2-c]pyrrole-4(5H)-carboxylate (11b)**

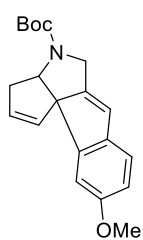

Compound **10b** (77 mg, 0.14 mmol) was dissolved in dry DMF (4 mL) under argon atmosphere and then TBAF (0.5 mL of 1M solution in THF, 0.54 mmol) was added. The reaction mixture was heated to 90 °C and stirred for 16 h. Then it was cooled to room temperature, diluted with Et<sub>2</sub>O (35 mL) and washed with water (3 × 10 mL). The organic phase was dried over Na<sub>2</sub>SO<sub>4</sub>, filtered and concentrated under reduced pressure. The crude product was purified on a short plug of silica gel (9/1 hexanes/EtOAc) to provide the title compound as brown-orange oil (40 mg, 91%). The compound is rather unstable.

**<sup>1</sup>H NMR** (400 MHz, CDCl<sub>3</sub>, mixture of rotamers, signals of both rotamers are listed) δ 7.16 (d, *J* = 8.2 Hz, 1H), 7.16 (d, *J* = 8.2 Hz, 1H<sup>#</sup>), 6.81 – 6.76 (m, 1H, 1H<sup>#</sup>), 6.72 (d, *J* = 2.4 Hz, 1H<sup>#</sup>), 6.70 (d, *J* = 2.4 Hz, 1H), 6.48 – 6.47 (m, 1H), 6.47 – 6.45 (m, 1H<sup>#</sup>), 6.10 – 6.04 (m, 1H, 1H<sup>#</sup>), 5.37 – 5.31 (m, 1H, 1H<sup>#</sup>), 4.24 (d, *J* = 13.2 Hz, 1H), 4.14 (d, *J* = 13.2 Hz, 1H<sup>#</sup>), 4.03 – 3.94 (m, 2H, 2H<sup>#</sup>), 3.79 (s, 3H, 3H<sup>#</sup>), 3.01 – 2.77 (m, 2H, 2H<sup>#</sup>), 1.46 (s, 9H<sup>#</sup>), 1.45 (s, 9H); **<sup>13</sup>C NMR** (150 MHz, CDCl<sub>3</sub>, mixture of rotamers, signals of both rotamers are listed) δ 158.12<sup>#</sup>, 158.09, 154.3, 154.2<sup>#</sup>, 149.8<sup>#</sup>, 149.5, 148.49<sup>#</sup>, 148.45,

138.7, 138.6<sup>#</sup>, 133.6<sup>#</sup>, 133.0, 132.7, 132.5<sup>#</sup>, 123.6, 123.4<sup>#</sup>, 121.7, 121.6<sup>#</sup>, 112.7 (1C, 1C<sup>#</sup>), 110.8<sup>#</sup>, 110.7, 79.7, 79.6<sup>#</sup>, 75.5, 74.9<sup>#</sup>, 62.9, 62.7<sup>#</sup>, 55.7 (1C, 1C<sup>#</sup>), 45.5<sup>#</sup>, 44.9, 42.1, 41.0<sup>#</sup>, 28.7 (1C, 1C<sup>#</sup>) (<sup>#</sup>rotamer signals – the signals are in pairs but could not be assigned to the particular rotamer, lower intensity signal of the pair is always marked by <sup>#</sup>); **IR** (KBr)  $\nu$  2974, 2869, 1694, 1604, 1392, 1284, 1165, 1105, 1027, 872, 773  $\text{cm}^{-1}$ ; **MS** (ESI)  $m/z$  (%) 673.4 (41, [2M+Na]<sup>+</sup>), 349.2 (18), 348.2 (100, [M+Na]<sup>+</sup>), 292.1 (9), 270.1 (23); **HRMS** (ESI)  $m/z$  calcd for C<sub>20</sub>H<sub>24</sub>O<sub>3</sub>N 326.1751, found 326.1748.

### 3,3a,4,5-Tetrahydro-[1,3]dioxolo[4',5':5,6]indeno[1,2-c]cyclopenta[b]pyrrole (12a)

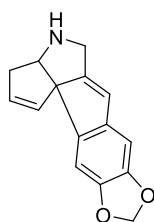

Compound **12a** was synthesized using a modified literature procedure.<sup>[3]</sup> Compound **11a** (41 mg, 0.12 mmol) was dissolved in dry DCM (4 mL) under argon atmosphere and the solution was transferred to the flask with a vacuum-dried (4 h, 140 °C) ZnBr<sub>2</sub> (135 mg, 0.60 mmol). The reaction mixture was stirred at room temperature for 20 h before being quenched with 1M aqueous solution of NaOH (2 mL) and vigorously stirred for an additional 5 min. The mixture was extracted between DCM (4 × 25 mL) and 1M solution of NaOH (15 mL). Combined organic layers were dried over Na<sub>2</sub>SO<sub>4</sub>, filtered and concentrated under reduced pressure to give NMR yield (82% with mesitylene as internal standard). The purification by column chromatography on silica gel (90/10 DCM/ 14% ammonia in methanol) is possible but about a quarter of the product is lost. The compound is also sensitive to acids and evaporation with silica gel.

<sup>1</sup>H NMR (400 MHz, CDCl<sub>3</sub>)  $\delta$  6.73 (s, 1H), 6.59 (s, 1H), 6.39 (dt,  $J$  = 1.8, 0.8 Hz, 1H), 6.10 – 6.06 (m, 1H), 5.93 – 5.89 (m, 2H), 5.46 – 5.41 (m, 1H), 3.74 (dd,  $J$  = 13.2, 2.1 Hz, 1H), 3.53 (d,  $J$  = 13.1, 1H), 3.46 (d,  $J$  = 5.2 Hz, 1H), 2.95 (dddd,  $J$  = 17.5, 5.4, 2.8, 1.8 Hz, 1H), 2.58 (bs, 1H), 2.45 (ddd,  $J$  = 17.4, 2.7, 1.5 Hz, 1H); <sup>13</sup>C NMR (100 MHz, CDCl<sub>3</sub>)  $\delta$  157.8, 147.2, 145.2, 140.3, 140.1, 133.5, 132.6, 123.0, 105.1, 102.3, 100.9, 75.8, 61.6, 43.7, 42.7; **IR** (KBr)  $\nu$  3227, 3055, 2897, 1693, 1476, 1392, 1311, 1159, 1043, 939, 862, 812, 727  $\text{cm}^{-1}$ ; **MS** (ESI)  $m/z$  (%) 240.1 (100, [M+H]<sup>+</sup>), 223.1 (43), 211.1 (11); **HRMS** (ESI)  $m/z$  calcd for C<sub>15</sub>H<sub>14</sub>O<sub>2</sub>N 240.1019, found 240.1019.

### 9-Methoxy-3,3a,4,5-tetrahydrocyclopenta[b]indeno[1,2-c]pyrrole (12b)

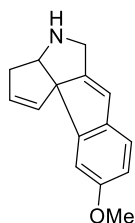

Compound **12b** was synthesized using a modified literature procedure.<sup>[3]</sup> Compound **11b** (42 mg, 0.13 mmol) was dissolved in dry DCM (4 mL) under argon atmosphere and the solution was transferred to the flask with a vacuum-dried (4 h, 150 °C) ZnBr<sub>2</sub> (145 mg, 0.14 mmol). The reaction mixture was stirred at room temperature for 20 h before being quenched with 1M aqueous solution of NaOH (2 mL) and vigorously stirred for an additional 5 min. The mixture was extracted between DCM (4 × 25 mL) and 1M solution of NaOH (15 mL). Combined organic

layers were dried over Na<sub>2</sub>SO<sub>4</sub>, filtered and concentrated under reduced pressure to give NMR yield (81% with mesitylene as internal standard). The purification by column chromatography on silica gel (97/3 DCM/ 14% ammonia in methanol) is possible but about half of the product (isolated as a dark grey oil) is lost. The compound is also sensitive to acids and evaporation with silica gel.

**<sup>1</sup>H NMR** (600 MHz, CDCl<sub>3</sub>) δ 7.12 (d, *J* = 8.2 Hz, 1H), 6.77 (dd, *J* = 8.2, 2.4 Hz, 1H), 6.67 (d, *J* = 2.2 Hz, 1H), 6.44 (s, 1H), 6.13 – 6.08 (m, 1H), 5.47 – 5.43 (m, 1H), 3.78 (s, 3H), 3.74 (dd, *J* = 13.1, 1.8 Hz, 1H), 3.54 (d, *J* = 13.1 Hz, 1H), 3.50 (d, *J* = 5.3 Hz, 1H), 2.98 (ddt, *J* = 17.5, 5.1, 2.2 Hz, 1H), 2.55 (bs, 1H), 2.48 (d, *J* = 17.4 Hz, 1H); **<sup>13</sup>C NMR** (150 MHz, CDCl<sub>3</sub>) δ 157.8, 156.6, 148.6, 139.6, 133.7, 132.8, 122.8, 121.2, 112.4, 110.7, 76.2, 61.6, 55.7, 44.0, 42.9; **IR** (KBr) ν 3400, 3059, 2927, 2871, 2733, 1693, 1606, 1581, 1469, 1385, 1284, 1223, 1161, 1028, 939, 872, 849, 806, 721 cm<sup>-1</sup>; **MS** (ESI) *m/z* (%) 226.1 (100, [M+H]<sup>+</sup>), 209.1 (28), 197.1 (11); **HRMS** (ESI) *m/z* calcd for C<sub>15</sub>H<sub>16</sub>ON 226.1226, found 226.1224.

#### 9-Methoxy-3,3a,4,5-tetrahydrocyclopenta[*b*]indeno[1,2-*c*]pyrrol-4-ium bromide (SI6b)

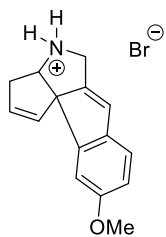

Compound **SI6b** was synthesized using a modified literature procedure.<sup>[3]</sup> Compound **11b** (20 mg, 0.06 mmol) was dissolved in dry DCM (2 mL) under argon atmosphere and the solution was transferred to the flask with a vacuum-dried (4 h, 150 °C) ZnBr<sub>2</sub> (71 mg, 0.32 mmol). The reaction mixture was stirred at room temperature for 22 h before being filtered through a piece of cotton. The filtrate was concentrated under reduced pressure and further dried at 10 mbar to provide the title compound as a white amorphous solid (84% NMR yield with mesitylene as an internal standard).

**<sup>1</sup>H NMR** (400 MHz, CD<sub>3</sub>OD) δ 7.27 – 7.23 (m, 1H), 6.87 (dd, *J* = 8.3, 2.4 Hz, 1H), 6.81 – 6.77 (m, 2H), 6.28 – 6.24 (m, 1H), 5.53 – 5.49 (m, 1H), 4.06 (d, *J* = 13.4 Hz, 1H), 3.97 – 3.86 (m, 2H), 3.78 (s, 3H), 3.29 – 3.20 (m, 1H), 2.97 – 2.89 (m, 1H); **<sup>13</sup>C NMR** (100 MHz, CD<sub>3</sub>OD) δ 160.2, 147.6, 139.3, 134.0, 133.6, 128.9, 123.6, 114.5, 111.8, 76.1, 64.5, 56.1, 44.2, 40.1 (one signal in the aromatic region is overlapped); **IR** (KBr) ν 3530, 3064, 1607, 1577, 1473, 1287, 1219, 1156, 1030, 934, 875, 719, 603, 531 cm<sup>-1</sup>; **MS** (ESI) *m/z* (%) 226.1 (42, M<sup>+</sup>), 209.1 (100), 197.1 (64); **MS** (ESI negative mode) *m/z* (%) 306.6 (80, [M-H]<sup>-</sup>), 304.4 (100, [M-H]<sup>-</sup>), 80.9 (43, Br<sup>-</sup>), 78.9 (44, Br<sup>-</sup>); **HRMS** (ESI) *m/z* calcd for C<sub>15</sub>H<sub>16</sub>ON 226.1226, found 226.1225.

#### 4-Methyl-3,3a,4,5-tetrahydro-[1,3]dioxolo[4',5':5,6]indeno[1,2-*c*]cyclopenta[*b*]pyrrole (1a)

Compound **1a** was synthesized using a modified literature procedure.<sup>[3]</sup> Compound **11a** (54 mg, 0.16 mmol) was dissolved in dry DCM (2 mL) under argon atmosphere and the solution was transferred to the

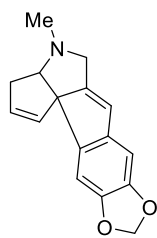

flask with a vacuum-dried (4 h, 140 °C) ZnBr<sub>2</sub> (179 mg, 0.78 mmol). The reaction mixture was stirred at room temperature for 16 h before being quenched with 1M solution of NaOH (3 mL) and vigorously stirred for an additional 5 min. The mixture was extracted between DCM (7 × 25 mL) and 1M solution of NaOH (15 mL). The water phase was neutralized with 1M HCl and extracted with DCM (3 × 25 mL). Combined organic layers were dried over Na<sub>2</sub>SO<sub>4</sub>, filtered and concentrated under reduced pressure.

The extract was dissolved in dry MeOH (2.1 mL) and then formaldehyde (52 uL of 37% solution in water, 0.70 mmol) was added. The mixture was stirred for 3 h at room temperature and then NaBH<sub>3</sub>CN (27 mg, 0.42 mmol) was added. After 19 h the mixture was extracted between DCM (3 × 25 mL) and 1M aqueous solution of NaHCO<sub>3</sub> (25 mL). Combined organic layers were dried over Na<sub>2</sub>SO<sub>4</sub>, filtered and concentrated under reduced pressure. The crude product was loaded on a column in a small amount of DCM and purified by column chromatography on silica gel (95/4.5/0.5 DCM /MeOH/NH<sub>4</sub>OH to provide the title compound as a dark orange oil (21 mg, 52%).

<sup>1</sup>H NMR (400 MHz, CDCl<sub>3</sub>) δ 6.74 (s, 1H), 6.59 (s, 1H), 6.45 – 6.39 (m, 1H), 6.09 – 6.03 (m, 1H), 5.98 – 5.89 (m, 2H), 5.54 – 5.48 (m, 1H), 4.00 (dd, *J* = 13.7, 2.1 Hz, 1H), 3.12 (dd, *J* = 13.7, Hz, 1H), 2.87 – 2.59 (m, 3H), 2.47 (s, 3H); <sup>13</sup>C NMR (100 MHz, CDCl<sub>3</sub>) δ 154.3, 147.3, 145.4, 140.5, 139.6, 134.4, 132.3, 123.8, 105.2, 102.3, 101.1, 76.5, 71.1, 53.1, 42.2, 39.6; IR (KBr) ν 3037, 2929, 2898, 2848, 2777, 1705, 1601, 1464, 1309, 1165, 1153, 1038, 1030, 935, 872, 787, 721 cm<sup>-1</sup>; MS (ESI) *m/z* (%) 254,1 (100, [M+H]<sup>+</sup>), 225.1 (6), 223.1 (22), 197.1 (12); HRMS (ESI) *m/z* calcd for C<sub>16</sub>H<sub>16</sub>O<sub>2</sub>N 254.1176, found 254.1179.

### 9-Methoxy-4-methyl-3,3a,4,5-tetrahydrocyclopenta[*b*]indeno[1,2-*c*]pyrrole (1b)

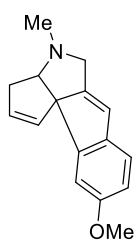

Compound **1b** was synthesized using modified literature procedures.<sup>[3,4]</sup> Compound **1b** (42 mg, 0.13 mmol) was dissolved in dry DCM (4 mL) under argon atmosphere and the solution was transferred to the flask with a vacuum-dried (4 h, 150 °C) ZnBr<sub>2</sub> (145 mg, 0.14 mmol) under argon atmosphere. The reaction mixture was stirred at room temperature for 20 h before being quenched with 1M solution of NaOH (2 mL) and vigorously stirred for an additional 5 min. The mixture was extracted between DCM (4 × 25 mL) and 1M solution of NaOH (15 mL). Combined organic layers were dried over Na<sub>2</sub>SO<sub>4</sub>, filtered and concentrated under reduced pressure.

The extract was dissolved in dry MeOH (2.6 mL) and then formaldehyde (39 uL of 37% solution in water, 0.52 mmol) and ZnCl<sub>2</sub> (7 mg, 0.05 mmol) were added. The mixture was stirred for 1.5 h at room temperature before cooling to 0 °C and addition of NaBH<sub>3</sub>CN (13 mg, 0.21 mmol). After 5 min at 0 °C, the reaction mixture was allowed to warm up to room temperature and stirred for an additional 4 h before

being extracted with DCM ( $5 \times 25$  mL) and water (15 mL). Combined organic layers were dried over  $\text{Na}_2\text{SO}_4$ , filtered and concentrated under reduced pressure. The crude product was purified by column chromatography on silica gel (95/5 DCM /14% ammonia in methanol) to provide the title compound as an orange oil (23 mg, 74%).

**$^1\text{H}$  NMR** (400 MHz,  $\text{CDCl}_3$ )  $\delta$  7.13 (d,  $J = 8.2$  Hz, 1H), 6.77 (dd,  $J = 8.2, 2.5$  Hz, 1H), 6.67 (d,  $J = 2.5$  Hz, 1H), 6.46 – 6.42 (m, 1H), 6.11 – 6.05 (m, 1H), 5.56 – 5.51 (m, 1H), 3.97 (dd,  $J = 13.6, 2.1$  Hz, 1H), 3.78 (s, 3H), 3.10 (dd,  $J = 13.6, 1.3$  Hz, 1H), 2.85 – 2.75 (m, 2H), 2.63 – 2.55 (m, 1H), 2.45 (s, 3H);  **$^{13}\text{C}$  NMR** (100 MHz,  $\text{CDCl}_3$ )  $\delta$  157.7, 153.1, 148.6, 139.0, 134.5, 132.4, 123.6, 121.3, 112.5, 110.6, 76.8, 70.8, 55.7, 53.1, 42.3, 39.7; **IR** (KBr)  $\nu$  3055, 2935, 2835, 1687, 1606, 1581, 1469, 1284, 1213, 1155, 1028, 870, 847, 789, 710  $\text{cm}^{-1}$ ; **MS** (ESI)  $m/z$  (%) 240.1 ( $[\text{M}+\text{H}]^+$ , 100); **HRMS** (ESI)  $m/z$  calcd for  $\text{C}_{16}\text{H}_{18}\text{ON}$  240.1383, found 240.1384.



## 5. Synthesis of *N*-alkyl quarternary salts

### 3-(Benzo[d][1,3]dioxol-5-yl(triethylsilyl)methylene)-1,1-dimethyl-1,2,3,5,6,6a-hexahydro-cyclopenta[*b*]pyrrol-1-ium (6c)

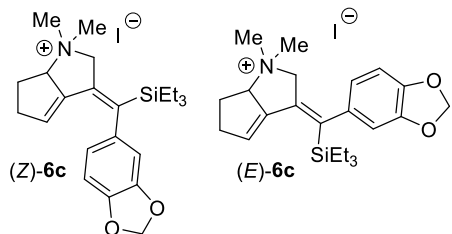

Compound **4a** (58 mg, 0.16 mmol, *Z/E* ratio = 83/17) was dissolved in dry THF (2 mL) under argon atmosphere. Na<sub>2</sub>CO<sub>3</sub> (103 mg, 0.93 mmol) and iodomethane (51  $\mu$ L, 0.78 mmol) were added and the mixture was stirred at room temperature for 3 h before filtration followed by DCM wash. The unreacted iodomethane was removed

and the mixture was concentrated on a rotary evaporator at 45 °C under reduced pressure. The crude product was crystallized from DCM/hexanes and the mother liquor was subjected to column chromatography (gradient elution 100  $\rightarrow$  85/15 DCM/MeOH) to give a summary yield of 50% (40 mg, *Z/E* ratio = 78/22) of title compound **6c** as a white crystalline solid. For the bioactivity testing and melting point measurement, the pure (*Z*)-**6c** obtained in a small amount from a different batch was used.

(*Z*)-**6c**: White crystalline solid, **m.p.** = 203.2 °C (from DCM/hexanes); <sup>1</sup>H NMR (400 MHz, CD<sub>3</sub>OD)  $\delta$  6.85 (dd, *J* = 11.3, 7.9 Hz, 1H), 6.55 – 6.37 (m, 2H), 6.01 – 5.92 (m, 2H), 5.04 – 4.94 (m, 1H), 4.90 – 4.79 (m, 2H), 4.63 (dd, *J* = 14.3, 3.3 Hz, 1H), 3.29 (s, 3H), 2.94 (s, 3H), 2.76 – 2.58 (m, 2H), 2.27 – 2.16 (m, 1H), 2.05 – 1.90 (m, 1H), 0.97 (t, *J* = 7.9 Hz, 9H), 0.72 – 0.64 (m, 6H); <sup>1</sup>H NMR (600 MHz, CD<sub>2</sub>Cl<sub>2</sub>, mixture of rotamers, signals of both rotamers are listed)  $\delta$  6.82 (d, *J* = 7.5 Hz, 1H), 6.81 (d, *J* = 7.4 Hz, 1H<sup>#</sup>), 6.46 (s, 1H), 6.46 (s, 1H<sup>#</sup>), 6.43 (dd, *J* = 7.9, 1.7 Hz, 1H), 6.40 (dd, *J* = 7.9, 1.7 Hz, 1H<sup>#</sup>), 5.98 (s, 2H), 5.97 – 5.95 (m, 2H<sup>#</sup>), 5.08 – 4.82 (m, 4H, 4H<sup>#</sup>), 3.64 – 3.61 (m, 3H, 3H<sup>#</sup>), 3.08 (s, 3H), 3.06 (s, 3H<sup>#</sup>), 2.76 – 2.60 (m, 2H, 2H<sup>#</sup>), 2.30 – 2.23 (m, 1H, 1H<sup>#</sup>), 1.93 – 1.84 (m, 1H, 1H<sup>#</sup>), 0.97 – 0.92 (m, 9H, 9H<sup>#</sup>), 0.76 – 0.61 (m, 6H, 6H<sup>#</sup>) (<sup>#</sup>rotamer signals – the signals could not be assigned to the particular rotamer, one signal of the pair is always marked by <sup>#</sup>); <sup>13</sup>C NMR (150 MHz, CD<sub>2</sub>Cl<sub>2</sub>)  $\delta$  148.9, 148.3<sup>#</sup>, 146.70, 146.68<sup>#</sup>, 146.65, 146.63<sup>#</sup>, 138.3<sup>#</sup>, 138.2, 137.46, 137.44<sup>#</sup>, 133.80, 133.77<sup>#</sup>, 132.1, 131.7<sup>#</sup>, 120.0<sup>#</sup>, 119.0, 109.7<sup>#</sup>, 108.7, 107.6, 106.9<sup>#</sup>, 101.69, 101.66<sup>#</sup>, 86.72, 86.69<sup>#</sup>, 75.9 (1C, 1C<sup>#</sup>), 52.3 (1C, 1C<sup>#</sup>), 45.0 (1C, 1C<sup>#</sup>), 37.5, 37.4<sup>#</sup>, 23.9 (1C, 1C<sup>#</sup>), 7.8 (3C, 3C<sup>#</sup>), 3.9 (3C, 3C<sup>#</sup>) (<sup>#</sup>rotamer signals – the signals are in pairs but could not be assigned to the particular rotamer, lower intensity signal of the pair is always marked by <sup>#</sup>); IR (KBr)  $\nu$  3001, 2953, 2869, 1601, 1479, 1431, 1326, 1242, 1042, 1009, 934, 875, 836, 725 cm<sup>-1</sup>; MS (ESI) *m/z* (%) 385.2 (25), 384.2 (100, [M]<sup>+</sup>), 339.2 (10); HRMS (ESI) *m/z* calcd for C<sub>23</sub>H<sub>34</sub>O<sub>2</sub>NSi 384.2353, found 384.2353.

(*E*)-**6c**: <sup>1</sup>H NMR (400 MHz, CD<sub>3</sub>OD)  $\delta$  6.87 – 6.81 (m, 1H), 6.47 – 6.37 (m, 2H), 5.99 – 5.93 (m, 2H), 5.19 – 5.11 (m, 1H), 4.91 – 4.85 (m, 1H), 4.64 (d, *J* = 15.1 Hz, 1H), 4.07 (d, *J* = 15.0 Hz, 1H), 3.14

(s, 3H), 3.04 – 2.97 (m, 1H), 2.84 (s, 3H), 2.73 – 2.59 (m, 1H), 2.41 – 2.30 (m, 1H), 2.19 – 2.09 (m, 1H), 0.95 – 0.87 (m, 9H), 0.76 – 0.68 (m, 6H);

### 9-Methoxy-4,4-dimethyl-3,3a,4,5-tetrahydrocyclopenta[*b*]indeno[1,2-*c*]pyrrol-4-ium (13b)

Compound **1b** (17 mg, 0.07 mmol) was dissolved in CHCl<sub>3</sub> (2.5 mL) and iodomethane (44 uL, 0.70 mmol) was added. The resulting mixture was stirred at room temperature for 96 h before the solvent was removed under reduced pressure. The crude product was purified by column chromatography on silica gel

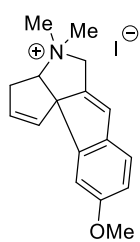

(gradient elution 95/5 → 90/10 DCM /MeOH) to provide the title compound as an orange oil (15 mg, 57% isolated yield, 62% NMR yield).

<sup>1</sup>H NMR (400 MHz, CDCl<sub>3</sub>) δ 7.30 (d, *J* = 8.4 Hz, 1H), 7.02 – 6.98 (m, 1H), 6.88 (dd, *J* = 8.4, 2.3 Hz, 1H), 6.73 (d, *J* = 2.2 Hz, 1H), 6.24 – 6.19 (m, 1H), 5.46 – 5.41 (m, 1H), 4.77 (d, *J* = 12.6 Hz, 1H), 4.21 (d, *J* = 6.2 Hz, 1H), 4.05 (d, *J* = 12.6 Hz, 1H), 3.81 (s, 3H), 3.59 (s, 3H), 3.39 – 3.26 (m, 5H); <sup>13</sup>C NMR (100 MHz, CDCl<sub>3</sub>) δ 159.6, 147.1, 140.5, 136.7, 133.2, 132.4, 131.8, 123.8, 114.5, 110.9, 82.3, 75.4, 64.8, 56.4, 55.9, 51.0, 37.2; IR (KBr) ν 3452, 3003, 2962, 2835, 2040, 1606, 1581, 1470, 1435, 1296, 1219, 1146, 1024, 908, 820, 729, 606, 465 cm<sup>-1</sup>; MS (ESI) *m/z* (%) 254.1 (100, [M]<sup>+</sup>), 255.1 (10); HRMS (ESI) *m/z* calcd for C<sub>17</sub>H<sub>20</sub>ON 254.1539, found 254.1541; HRMS (ESI negative mode) *m/z* calcd for I 126.9050, found 126.9050.

## 6. Enantioselective synthesis

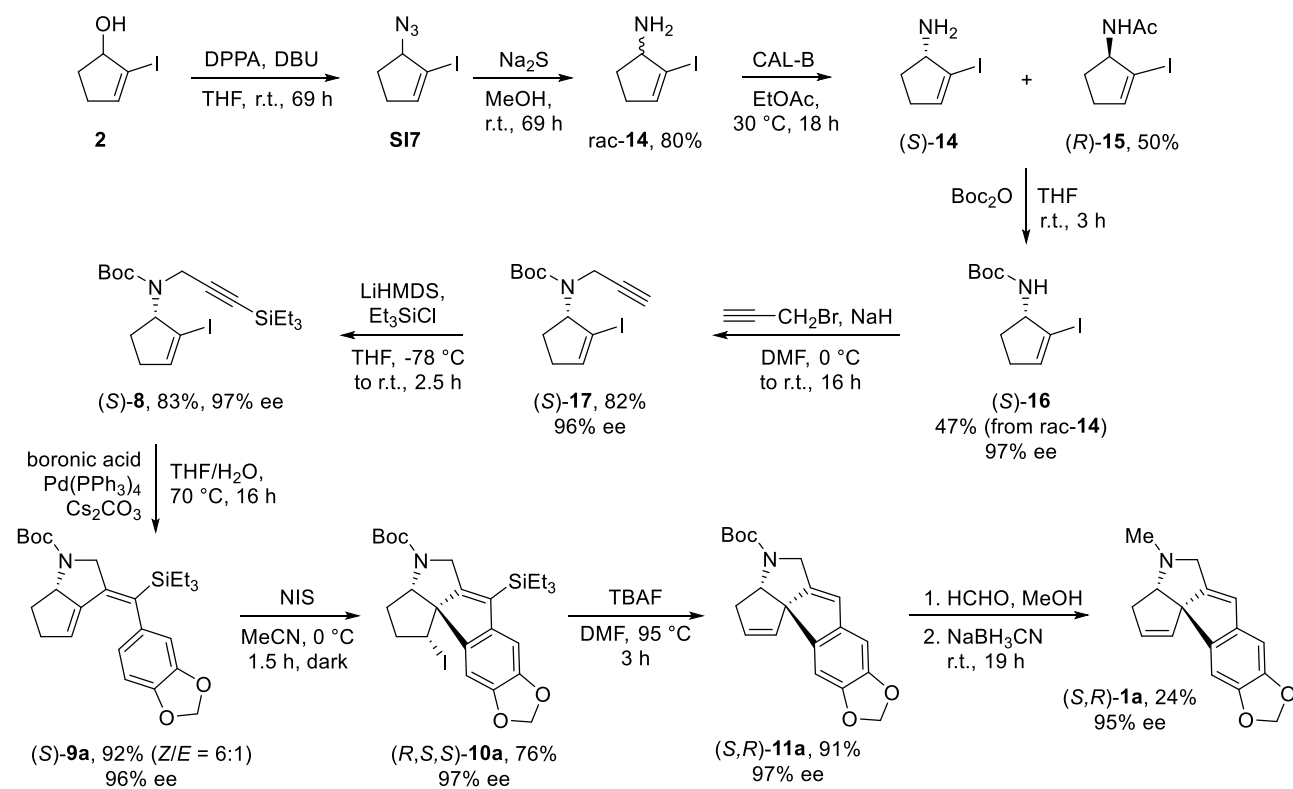

Table S5. Selected results from the optimisation of the reduction of azide **SI7** to amine **14**

| Entry | Reductant (eq.)                                          | Solvent                                | Conditions <sup>a)</sup> | Time (h) | Work-up                                   | Yield after work-up <sup>b)</sup> (%) | Purification <sup>c)</sup>  | Isolated yield (%)                  |
|-------|----------------------------------------------------------|----------------------------------------|--------------------------|----------|-------------------------------------------|---------------------------------------|-----------------------------|-------------------------------------|
| 1     | PPh <sub>3</sub> (2.0)                                   | THF/H <sub>2</sub> O                   | air                      | 17       | extraction                                | ---                                   | CHR                         | 62 <sup>d)</sup>                    |
| 2     | PPh <sub>3</sub> (2.0)                                   | THF/H <sub>2</sub> O                   | argon                    | 20       | extraction                                | 80                                    | CHR                         | 32 <sup>d)</sup>                    |
| 3     | PPh <sub>3</sub> (2.0)                                   | THF/H <sub>2</sub> O                   | argon                    | 17       | extraction                                | 90                                    | ---                         | ---                                 |
| 4     | PPh <sub>3</sub> (2.0)                                   | THF/H <sub>2</sub> O                   | argon                    | 18       | ac.-bas. ext.                             | 47                                    | ---                         | ---                                 |
| 5     | PPh <sub>3</sub> (1.5)                                   | Et <sub>2</sub> O/1M HCl <sup>f)</sup> | argon                    | 24       | basic ext. <sup>g), h)</sup>              | 40                                    | CHR                         | 15 <sup>d)</sup>                    |
| 6     | PPh <sub>3</sub> (1.5)                                   | Et <sub>2</sub> O/H <sub>2</sub> O     | argon                    | 24       | extraction                                | 82                                    | PRC, CHR                    | 82 <sup>i)</sup> , 55 <sup>j)</sup> |
| 7     | PPh <sub>3</sub> (1.1)                                   | Et <sub>2</sub> O/H <sub>2</sub> O     | argon                    | 24       | drying <sup>k)</sup>                      | 78                                    | PRC, TLW, NEU <sup>h)</sup> | 68 <sup>d)</sup>                    |
| 8     | PPh <sub>3</sub> (1.1)                                   | Et <sub>2</sub> O/H <sub>2</sub> O     | argon                    | 19       | drying <sup>k)</sup>                      | ---                                   | PRC, TLW, NEU <sup>l)</sup> | 65 <sup>d)</sup>                    |
| 9     | PMe <sub>3</sub> (1.5)                                   | Et <sub>2</sub> O/H <sub>2</sub> O     | argon                    | 5        | drying <sup>k)</sup>                      | 71                                    | ---                         | ---                                 |
| 10    | PMe <sub>3</sub> (1.5)                                   | Et <sub>2</sub> O/H <sub>2</sub> O     | argon                    | 15       | drying, <sup>k)</sup> evap. <sup>m)</sup> | 91                                    | CHR                         | 62                                  |
| 11    | PMe <sub>3</sub> (1.5)                                   | THF/H <sub>2</sub> O                   | air                      | 16       | extraction                                | 99                                    | CHR                         | 86                                  |
| 12    | Na <sub>2</sub> S (1.6)                                  | MeOH                                   | air                      | 15       | extraction                                | ---                                   | CHR                         | 72 <sup>n)</sup>                    |
| 13    | Na <sub>2</sub> S (4.0)                                  | MeOH                                   | air                      | 69       | extraction                                | ---                                   | CHR                         | 90                                  |
| 14    | H <sub>2</sub> S (excess) <sup>o)</sup>                  | MeOH/H <sub>2</sub> O                  | air                      | 22       | extraction                                | ---                                   | CHR                         | 0 <sup>p)</sup>                     |
| 15    | HS(CH <sub>2</sub> ) <sub>3</sub> SH (4.0) <sup>q)</sup> | MeOH                                   | argon                    | 71       | ---                                       | ---                                   | CHR                         | 96                                  |
| 16    | HS(CH <sub>2</sub> ) <sub>3</sub> SH (4.1) <sup>r)</sup> | MeOH                                   | argon                    | 25       | filtration                                | ---                                   | CHR                         | 92                                  |

<sup>a)</sup> Reactions were stirred at r.t. <sup>b)</sup> NMR yield. Mesitylene was used as an internal standard. <sup>c)</sup> CHR: column chromatography on neutralised SiO<sub>2</sub>; PRC: precipitation with 1M HCl in ether; TLW: multiple washing with toluene; NEU: neutralisation <sup>d)</sup> Isolated yield is determined by NMR standard (mesitylene) due to presence of PPh<sub>3</sub>O byproduct. <sup>e)</sup> Crude containing PPh<sub>3</sub> and PPh<sub>3</sub>O was allowed to react with Boc<sub>2</sub>O without preceding resolution step to provide 74% of isolated yield of **16**. <sup>f)</sup> 1M HCl in H<sub>2</sub>O <sup>g)</sup> Et<sub>2</sub>O wash <sup>h)</sup> 1M solution of Na<sub>2</sub>CO<sub>3</sub> was added and resulting mixture was reextracted with Et<sub>2</sub>O. <sup>i)</sup> Yield after precipitation <sup>j)</sup> Yield after column chromatography <sup>k)</sup> Anhydrous Na<sub>2</sub>SO<sub>4</sub> was added and the mixture was filtered after 5 min. <sup>l)</sup> 1M solution of NaHCO<sub>3</sub> was used for neutralisation and resulting mixture was reextracted with Et<sub>2</sub>O. <sup>m)</sup> 1 h at 400 mbar at 30°C. <sup>n)</sup> Starting material was regenerated. <sup>o)</sup> H<sub>2</sub>S was generated from S<sub>8</sub>, paraffin wax, Al<sub>2</sub>O<sub>3</sub> (basic, Brock I) mixed in ratio 2/5/1. <sup>p)</sup> Starting material was regenerated. <sup>q)</sup> Et<sub>3</sub>N (4 eq.) was added. <sup>r)</sup> Et<sub>3</sub>N (4.1 eq.) was added.

**5-Azido-1-iodocyclopent-1-ene (SI7)**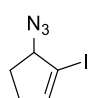

Alcohol **2** (265 mg, 1.26 mmol) was dissolved in dry THF (7.6 mL) under argon atmosphere. Diphenylphosphoryl azide (544  $\mu$ L, 2.52 mmol) and DBU (396  $\mu$ L, 2.65 mmol) were added and the resulting mixture was stirred at room temperature for 22 h before dilution with EtOAc (50 mL) and washing with 1M HCl ( $3 \times 10$  mL) and brine (10 mL). The organic layer was dried over  $\text{Na}_2\text{SO}_4$ , filtered, and concentrated under reduced pressure at  $30^\circ\text{C}$  (due to volatility of the compound). The crude product was purified by column chromatography on silica gel (9/1 hexanes/EtOAc) to give the title compound a brown oil (266 mg, 90%). The reaction was repeated several times with the yields in the range of 87-90%. The compound was stable for at least three weeks at  $-20^\circ\text{C}$ .

$^1\text{H NMR}$  (400 MHz,  $\text{CDCl}_3$ )  $\delta$  6.42 – 6.36 (m, 1H), 4.33 – 4.25 (m, 1H), 2.57 – 2.42 (m, 1H), 2.42 – 2.27 (m, 2H), 2.09 – 1.94 (m, 1H);  $^{13}\text{C NMR}$  (100 MHz,  $\text{CDCl}_3$ )  $\delta$  144.5, 93.2, 73.5, 33.5, 30.0; **IR** (KBr)  $\nu$  2941, 2850, 2096, 1601, 1327, 1254, 1219, 1022, 818, 739,  $557\text{ cm}^{-1}$ ; **MS** (EI)  $m/z$  (%) 234.9 (36,  $[\text{M}]^{+}$ ), 207.9 (5), 192.9 (100,  $[\text{M}-\text{N}_3]^{+}$ ), 151.9 (7), 126.8 (17), 66.0 (66), 53.0 (35), 39.0 (16), 27.0 (13); **HRMS** (APCI)  $m/z$  calcd for  $\text{C}_5\text{H}_7\text{NI}$ ,  $[\text{M}-\text{N}_2]^{+}$  207.9618, found 207.9619.

**2-Iodocyclopent-2-en-1-amine (rac-14)**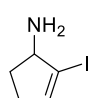

Compound **rac-14** was synthesized using a modified literature procedure.<sup>[5]</sup> Azide **SI7** (449 mg, 1.91 mmol) was dissolved in MeOH (5.7 mL) degassed by argon bubbling for 5 min, then  $\text{Na}_2\text{S} \cdot 9\text{H}_2\text{O}$  (1834 mg, 7.64 mmol) was added and the mixture was stirred at room temperature for 69 h before being diluted with EtOAc (20 mL) and filtered. The filtrate was extracted with water (20 mL) and then EtOAc ( $2 \times 30$  mL). The combined organic layers were dried over  $\text{Na}_2\text{SO}_4$ , filtered and concentrated under reduced pressure at room temperature. The crude product (loaded in a small amount of EtOAc) was purified by column chromatography on neutralized silica gel (gradient elution 97.5/2.3/0.2  $\rightarrow$  95/4.5/0.5 DCM/MeOH/ $\text{NH}_4\text{OH}$ ) was performed. The title compound was obtained as a brown oil (359 mg, 90%). The spectral data were in agreement with those already reported.<sup>[2]</sup>

**2-Iodocyclopent-2-en-1-aminium chloride (SI8)**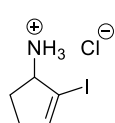

Compound **rac-14** (96 mg, 0.39 mmol) was dissolved in ether and an excess of 1M HCl in dry ether was added to form a white precipitate. The suspension was left for 5 min to settle down and be decanted. The solid was washed with ether and

decantation was repeated. The ether residue was removed under reduced pressure to provide the title compound as a white powder in quantitative yield.

$^1\text{H NMR}$  (400 MHz,  $\text{D}_2\text{O}$ )  $\delta$  6.63 (dt,  $J = 4.0, 1.4$  Hz, 1H), 4.42 – 4.35 (m, 1H), 2.61 – 2.40 (m, 3H), 2.04 – 1.92 (m, 1H);  $^1\text{H NMR}$  (400 MHz,  $(\text{CD}_3)_2\text{SO}$ )  $\delta$  8.39 (bs, 3H), 6.55 – 6.51 (m, 1H), 4.18 – 4.10 (m, 1H), 2.53 – 2.41 (m, 1H), 2.34 – 2.22 (m, 2H), 1.96 – 1.83 (m, 1H);  $^{13}\text{C NMR}$  (100 MHz,  $(\text{CD}_3)_2\text{SO}$ )  $\delta$  147.1, 90.6, 62.3, 32.9, 28.3; **IR** (KBr)  $\nu$  3450, 3371, 2978, 2910, 2856, 2706, 2619, 2036, 1603, 1508, 1379, 1325, 1134, 1026, 916, 849, 557, 418  $\text{cm}^{-1}$ ; **MS** (ESI)  $m/z$  (%) 210.0 (100,  $[\text{M}+\text{H}]^+$ ), 193.0 (94), 66.0 (29); **HRMS** (ESI)  $m/z$  calcd for  $\text{C}_5\text{H}_9\text{NI}$  209.9774, found 209.9775.

### *tert*-Butyl (*S*)-(2-iodocyclopent-2-en-1-yl)carbamate ((*S*)-16)

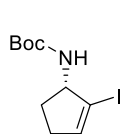

The title compound was prepared using a procedure reported earlier<sup>[2]</sup> with a reaction time of 18 h. The compound was isolated in 47% yield as a white amorphous solid.

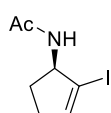

Using this procedure the compound (*R*)-15 was formed as well. The compound was isolated in 50% yield as a white crystalline solid, **m.p.** = 177.8 °C (recrystallized from EtOAc).

The spectral data of both compounds were in agreement with those already reported.<sup>[2]</sup>

**HLPC** analysis: The HPLC analysis was performed according to previously published<sup>[2]</sup>; IA, heptane/*i*-PrOH = 80/20, flow rate = 1 mL/min, sample dissolved in *i*-PrOH,  $\lambda = 190$  nm, retention time:  $t_{\text{R}}(\text{minor}) = 4.1$  min,  $t_{\text{R}}(\text{major}) = 4.5$  min, 97% *ee*.

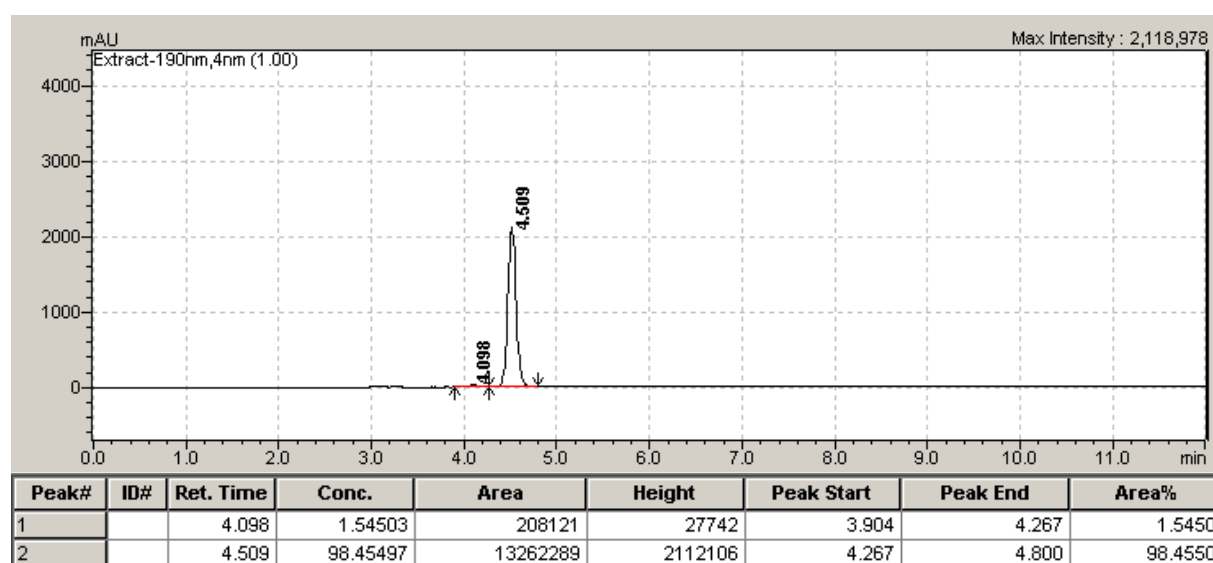

***tert*-Butyl (*S*)-(2-iodocyclopent-2-en-1-yl)(3-(triethylsilyl)prop-2-yn-1-yl)carbamate  
(*S*)-**8**)**

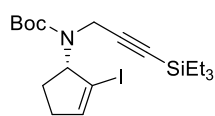

The title compound was prepared using the same procedure as for the preparation of compound *rac*-**8** (83% yield), as a light yellow oil. The spectral data of the product (*S*)-**8** were identical with those of the racemic compound *rac*-**8** and in agreement with those already reported.<sup>[2]</sup>

**HLPC** analysis: IC, heptane/*i*-PrOH = 100/0, flow rate = 1 mL/min, sample dissolved in heptane,  $\lambda = 200$  nm, retention time:  $t_R(\text{major}) = 14.3$  min,  $t_R(\text{minor}) = 20.9$  min, 97% *ee*.

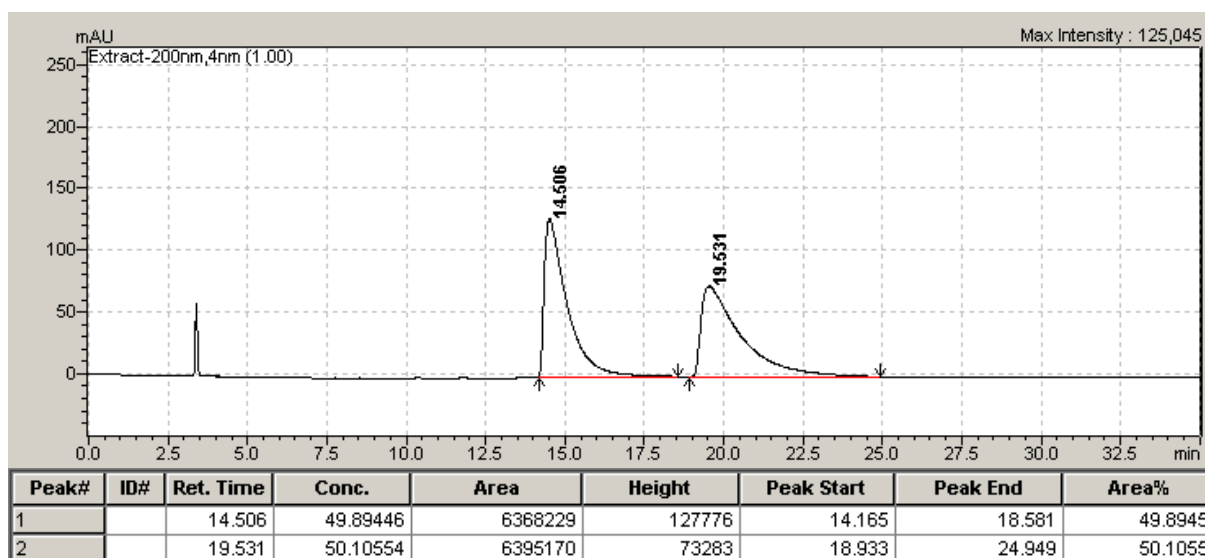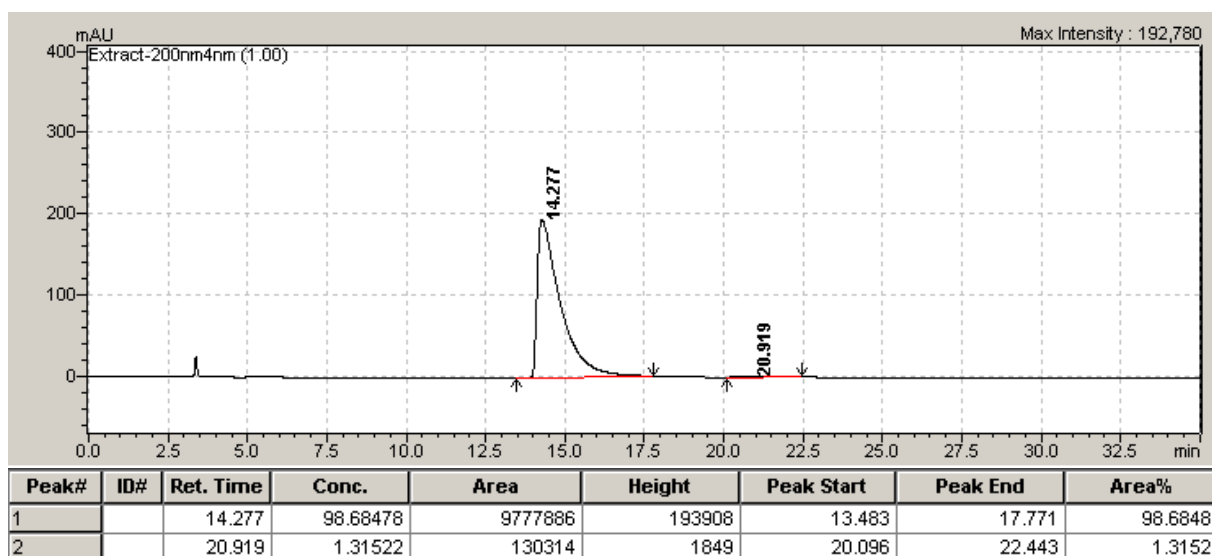

***tert*-Butyl (*S,Z*)-3-(benzo[*d*][1,3]dioxol-5-yl(triethylsilyl)methylene)-3,5,6,6a-tetrahydrocyclopenta[*b*]pyrrole-1(2*H*)-carboxylate ((*S*)-**9a**)**

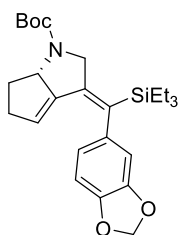

The title compound was prepared using the same procedure as for the preparation of compound rac-**9a** (92% yield, *E/Z* = 86/14), as a colorless foam. The spectral data of the product (*S*)-**9a** were identical with those of the racemic compound rac-**9** and in agreement with those already reported.<sup>[2]</sup>

**Specific rotation**  $[\alpha]_D^{20} = +123.5^\circ$  (c 0.5, CHCl<sub>3</sub>, 96% *ee*); **HLPC** analysis: IA, heptane/*i*-PrOH = 99.9/0.1, flow rate = 0.4 mL/min, sample dissolved in heptane,  $\lambda = 266$  nm, retention time:  $t_R(\text{minor}) = 12.7$  min,  $t_R(\text{major}) = 13.7$  min, 96% *ee*.

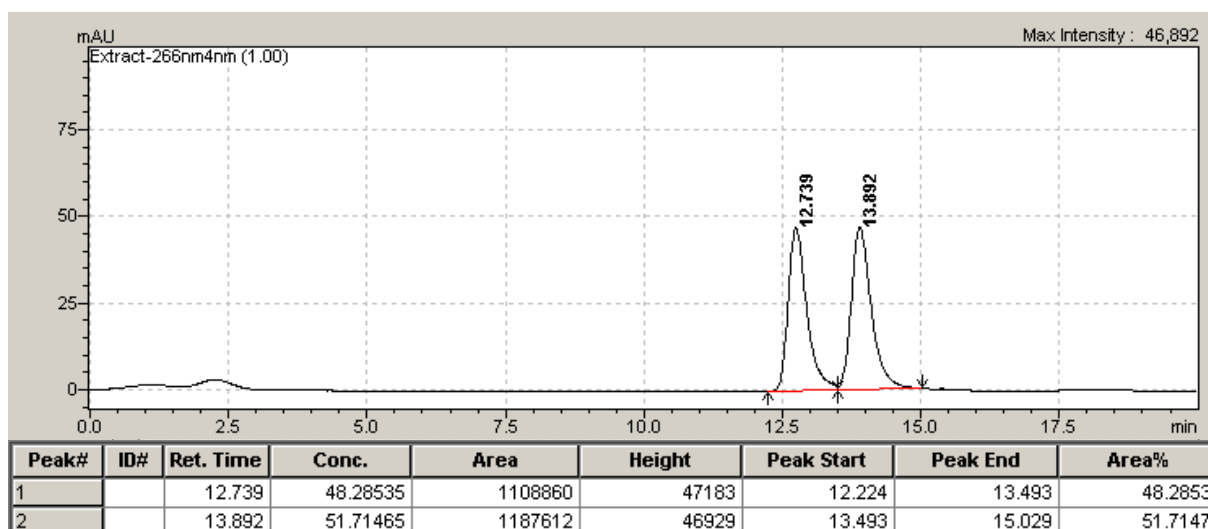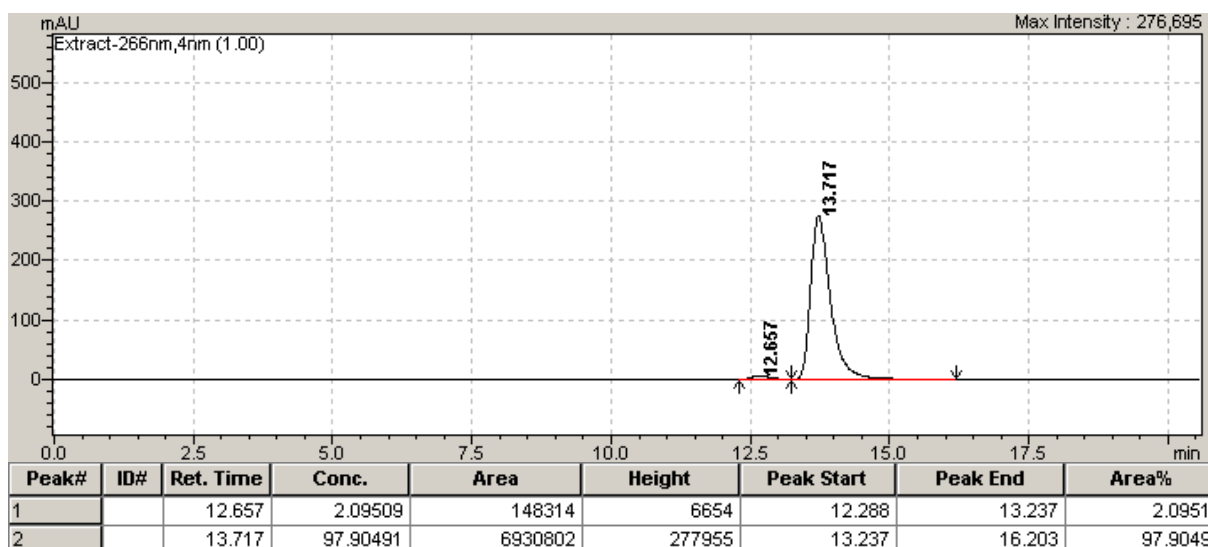



***tert*-Butyl 1-iodo-6-(triethylsilyl)-1,2,3,3a-tetrahydro-[1,3]dioxolo[4',5':5,6]indeno[1,2-*c*]cyclopenta[*b*]pyrrole-4(5*H*)-carboxylate ((*R,S,S*)-**10a**)**

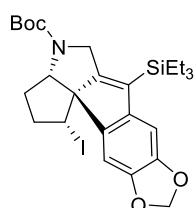

The title compound was prepared using the same procedure as for the preparation of compound rac-**10a** (76% yield), as a light yellow solid. The spectral data of the product (*R,S,S*)-**10a** were identical with those of the racemic compound rac-**10a** and in agreement with those already reported.<sup>[2]</sup>

**HLPC analysis:** IA, heptane/*i*-PrOH = 98/2, flow rate = 1 mL/min, sample dissolved in heptane,  $\lambda = 236$  nm, retention time:  $t_R(\text{major}) = 14.3$  min,  $t_R(\text{minor}) = 20.9$  min, 97% *ee*.

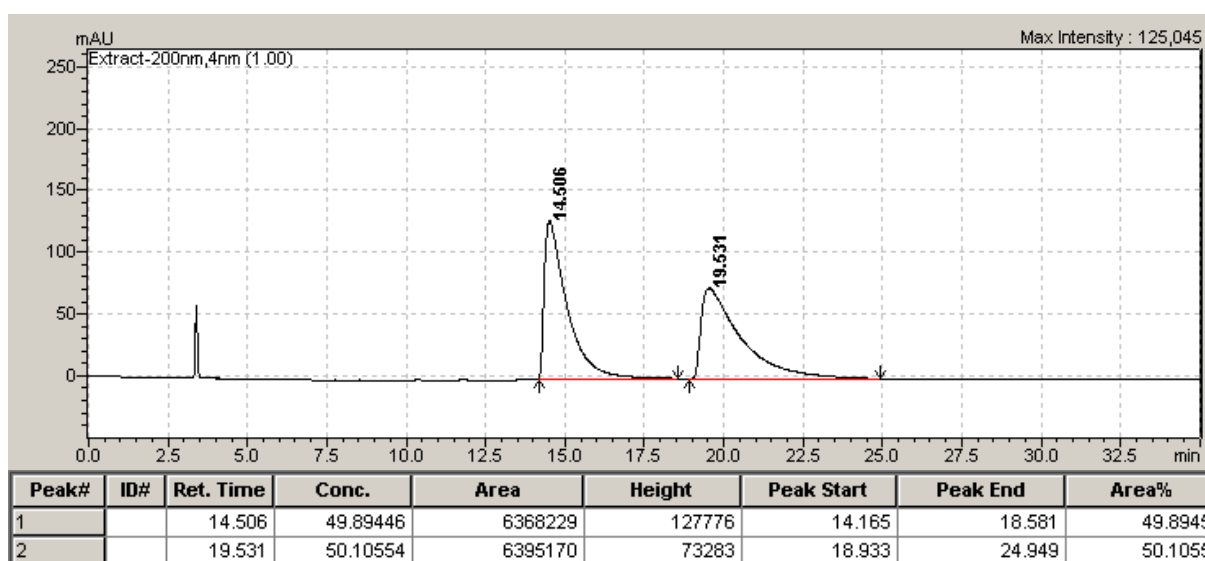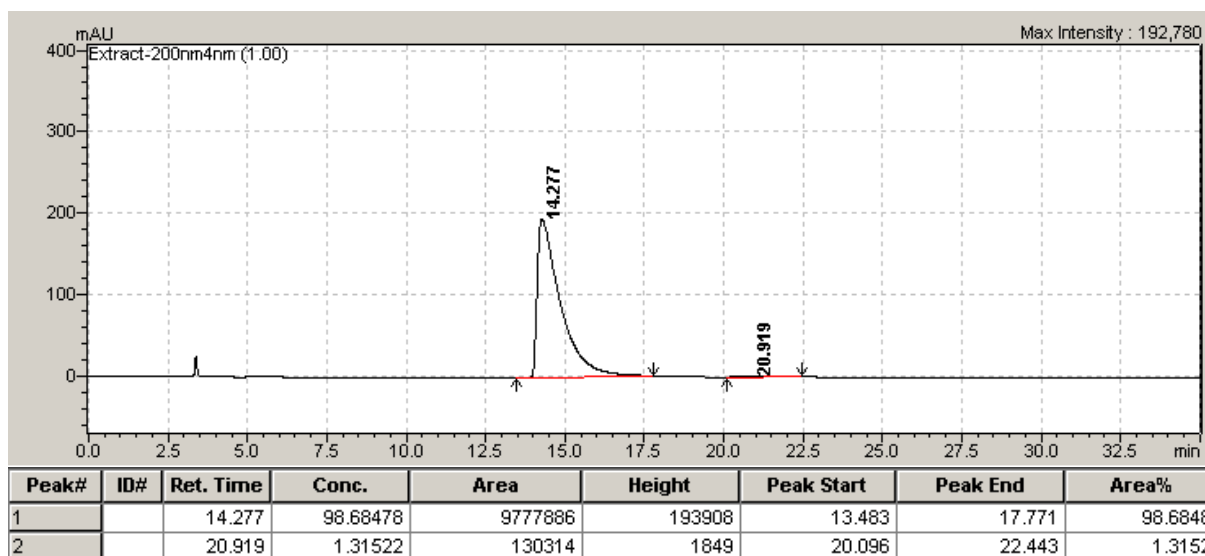

***tert*-Butyl 3,3a-dihydro-[1,3]dioxolo[4',5':5,6]indeno[1,2-*c*]cyclopenta[*b*]pyrrole-4(5*H*)-carboxylate ((*S,R*)-11a)**

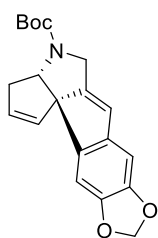

The title compound was prepared using the same procedure as for the preparation of compound rac-11a (91% yield), as an orange amorphous solid. The spectral data of the product (*S,R*)-11a were identical with those of the racemic compound rac-11.

**Specific rotation**  $[\alpha]_D^{20} = +416.5^\circ$  (c 0.6, CHCl<sub>3</sub>, 97% *ee*); **HLPC** analysis: IA, heptane/*i*-PrOH = 98/2, flow rate = 1 mL/min, sample dissolved in *i*-PrOH,  $\lambda = 200$  nm, retention time:  $t_R(\text{major}) = 14.3$  min,  $t_R(\text{minor}) = 20.9$  min, 97% *ee*.

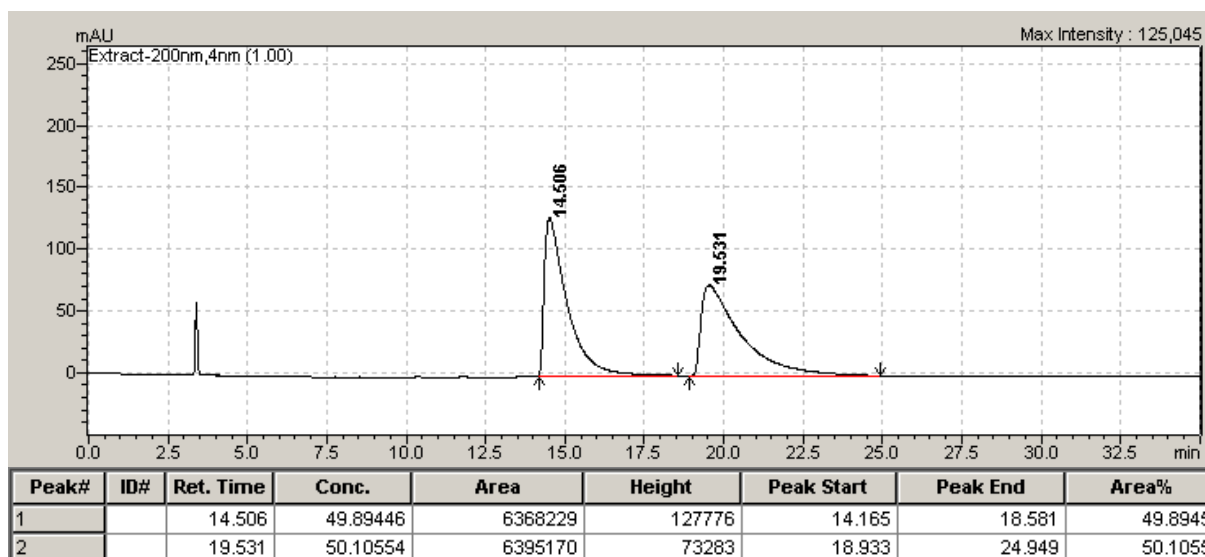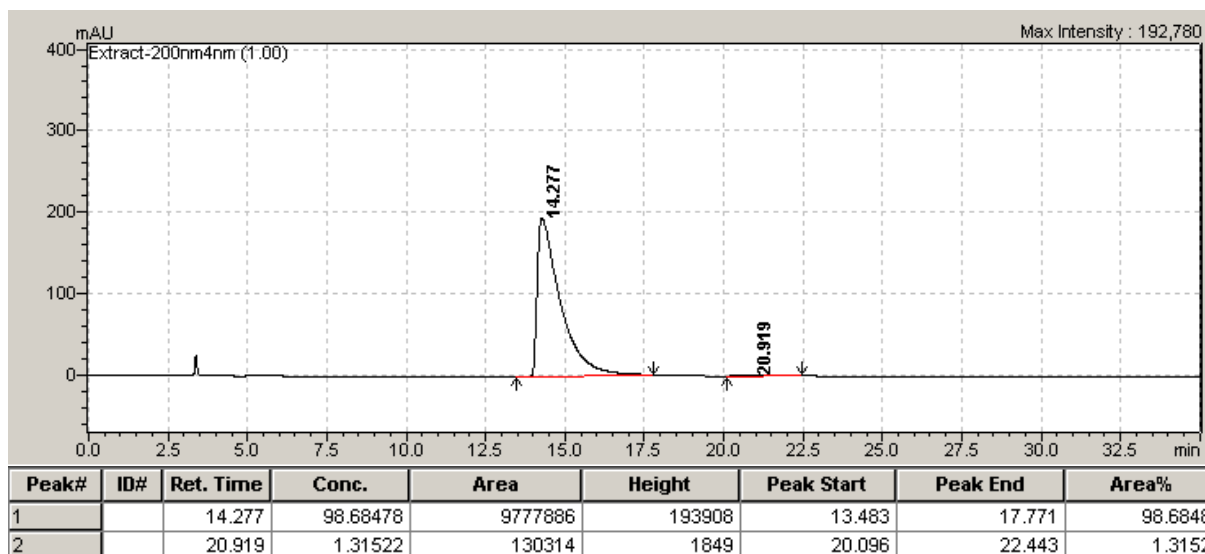

**4-Methyl-3,3a,4,5-tetrahydro-[1,3]dioxolo[4',5':5,6]indeno[1,2-c]cyclopenta[*b*]pyrrole**  
 ((*S,R*)-**1a**)

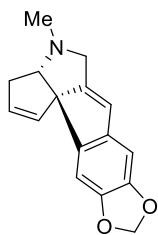

The title compound was prepared using the same procedure as for the preparation of compound rac-**1a** (24% yield), as a dark orange oil. The spectral data of the product (*S,R*)-**1a** were identical with those of the racemic compound rac-**1a**.

**Specific rotation**  $[\alpha]_D^{20} = +199.2^\circ$  (c 0.6, MeOH, 95% *ee*). **HLPC** analysis: ODH, heptane/*i*-PrOH = 99.5/0.5, flow rate = 1 mL/min, sample dissolved in *i*-PrOH,  $\lambda = 229$  nm, retention time:  $t_R(\text{minor}) = 10.6$  min,  $t_R(\text{major}) = 13.8$  min, 95% *ee*.

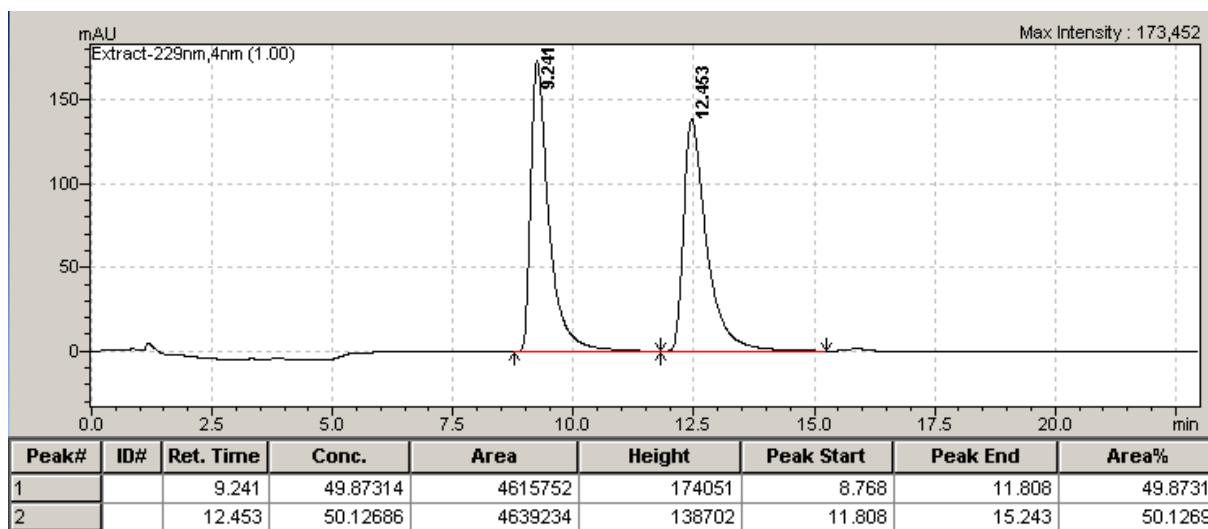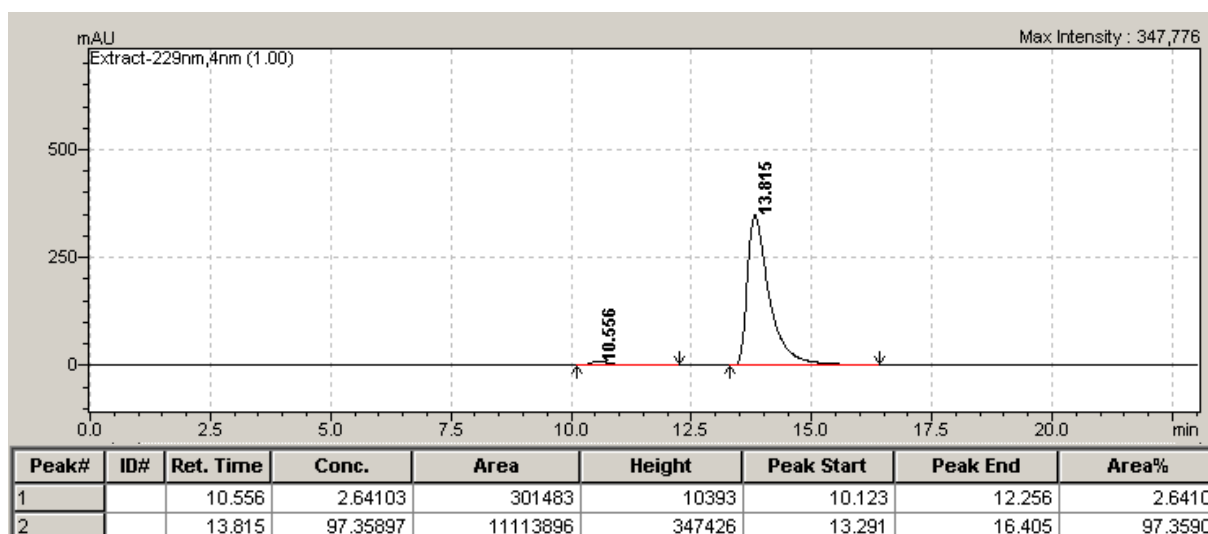

## 7. Biological testing

### hAChE and hBuChE Inhibition Assay

The inhibitory activities of prepared compounds and standards against human recombinant AChE (E.C.3.1.1.7) and human plasma BuChE (E.C. 3.1.1.8) were determined using modified Ellman's method<sup>[6]</sup> and expressed as IC<sub>50</sub> (the concentration of the compound that is required to reduce 50% of cholinesterase activity). Human recombinant AChE, phosphate buffer (PB, pH = 7.4), 5,5'-dithio-bis(2-nitrobenzoic) acid (Ellman's reagent, DTNB), acetylthiocholine (ATCh), butyrylthiocholine (BuTCh), and other used compounds were purchased from Sigma-Aldrich (Prague, Czech Republic). Human plasma was used as a source of BuChE and was prepared from heparinized human blood. Blood was centrifuged for 20 minutes (4 °C, 2300 × g) by Hettich Universal 320R centrifuge. The plasma was separated and stored at -80 °C. During the measurement, 96-well microplates from polystyrene (ThermoFisher Scientific, Waltham, MA, USA) were used. The solutions of the corresponding cholinesterase in PB were prepared up to the final activity 0.002 U/μL. The assay medium (100 μL) consisted of cholinesterase (10 μL), DTNB (20 μL of 0.01 M solution), and PB (40 μL of 0.1 M solution). The solutions of the tested compounds (10 μL of different concentrations) were pre-incubated for 5 minutes in the assay medium and then a solution of the substrate (20 μL of 0.01 M ATCh or BuTCh iodide solution) was added to initiate the reaction. The increase of absorbance was measured at 412 nm using Multimode microplate reader Synergy 2 (BioTek Inc., Winooski, VT, USA). For the calculation of the resulting measured activity (the percentage of inhibition I) following formula was used:

$$I = \left(1 - \frac{\Delta A_i}{\Delta A_0}\right) \times 100$$

where  $\Delta A_i$  indicates absorbance change provided by adequate enzyme exposed to the corresponding inhibitor and  $\Delta A_0$  indicates absorbance change when a solution of PB was added instead of a solution of inhibitor. Software Microsoft Excel (Redmont, WA, USA) and GraphPad Prism version 6.07 for Windows (GraphPad Software, San Diego, CA, USA) were used for the statistical data evaluation.

### IC<sub>50</sub> Determination

IC<sub>50</sub> values were determined only for compounds with more than 50% inhibition in the 100 μM screening test.

BuChE inhibition at different concentrations of compound **6c** (IC<sub>50</sub> = 35.8 ± 1.7 μM)

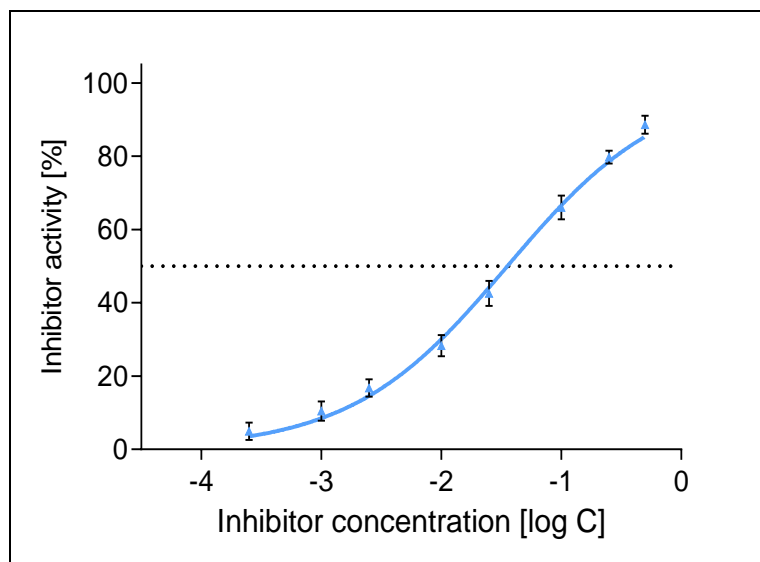

BuChE inhibition at different concentrations of compound **13b** (IC<sub>50</sub> = 73.9 ± 1.0 μM)

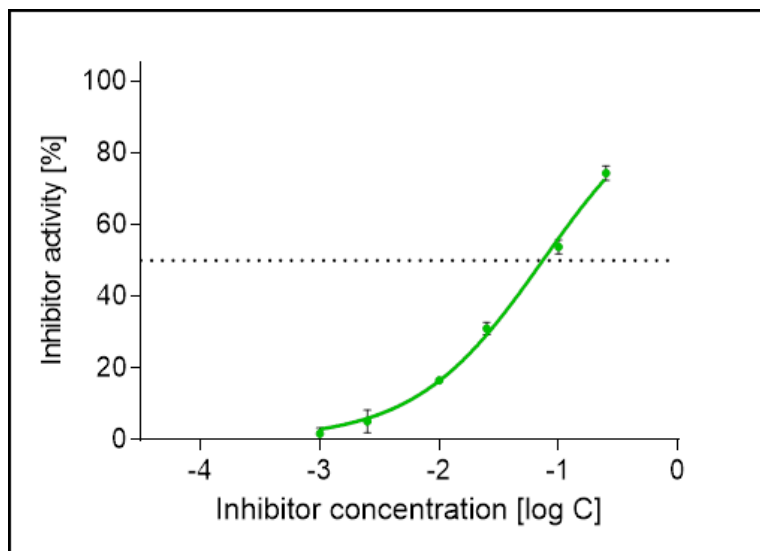

## 8. Molecular docking methods

The molecular models of each derivative were built using the Molecule module from the VMD software package.<sup>[7]</sup> Docking calculations were carried out using AutoDock Vina version 1.1.2 programme<sup>[8]</sup> and the UCSF Chimera graphical interface.<sup>[9]</sup> AutoDock Vina outputs correspond to the total Gibbs free energy of binding (in kcal/mol). Ligand parameterization for molecular-mechanical calculations was performed via the ParamChem server.<sup>[10]</sup> The energy minimization of ligand-AChE/BChE complexes was performed using the VMD software package and the NAMD simulation programme.<sup>[11]</sup> The results were visualized and figures produced using the UCSF Chimera programme.<sup>[9]</sup>

For molecular docking studies, *hAChE* (4bdt) and *hBuChE* (7amz) were used.

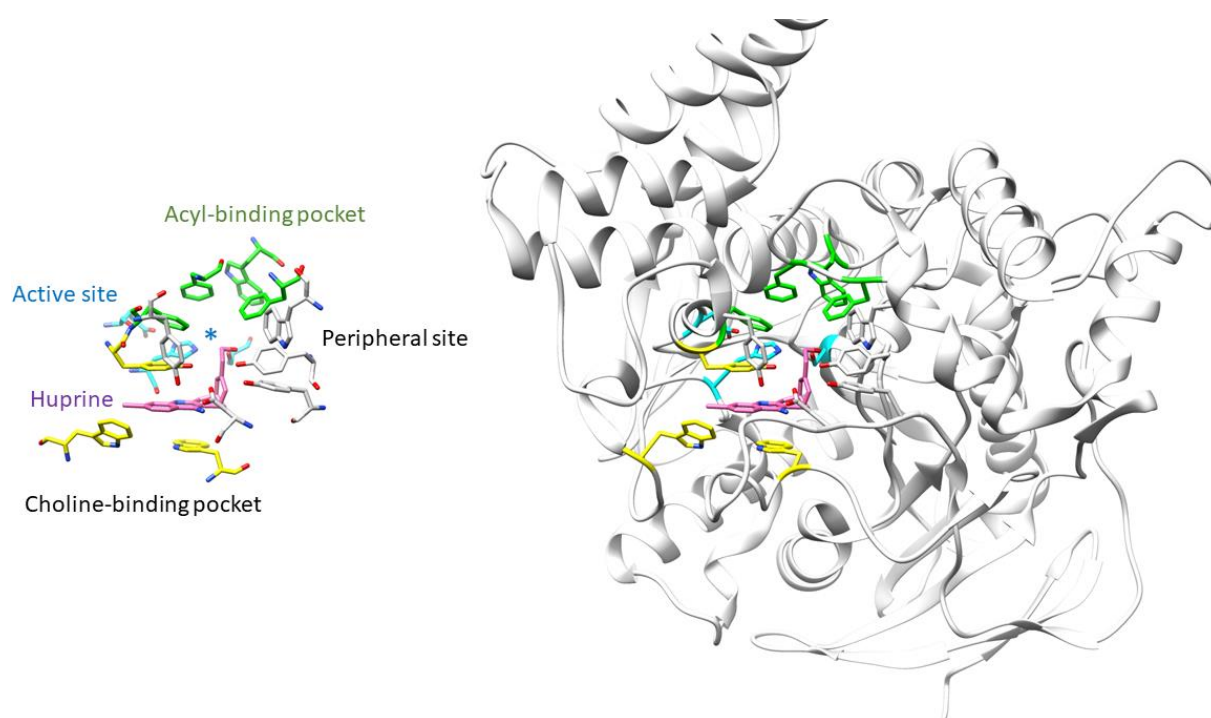

**Figure S1:** Active site of human acetylcholinesterase (*hAChE*; PDB id: 4bdt). The main residues are represented in sticks. The catalytic triad amino acids (Glu334, His447, Ser203) are in cyan. The acyl-binding pocket amino acids (Phe338, Phe295, Trp236, Phe297) are in green. The choline-binding pocket amino acids (Trp439, Tyr337, Trp86) are in yellow. Peripheral site residues (Tyr341, Asp74, Tyr72, Tyr124, Trp286) are in grey.

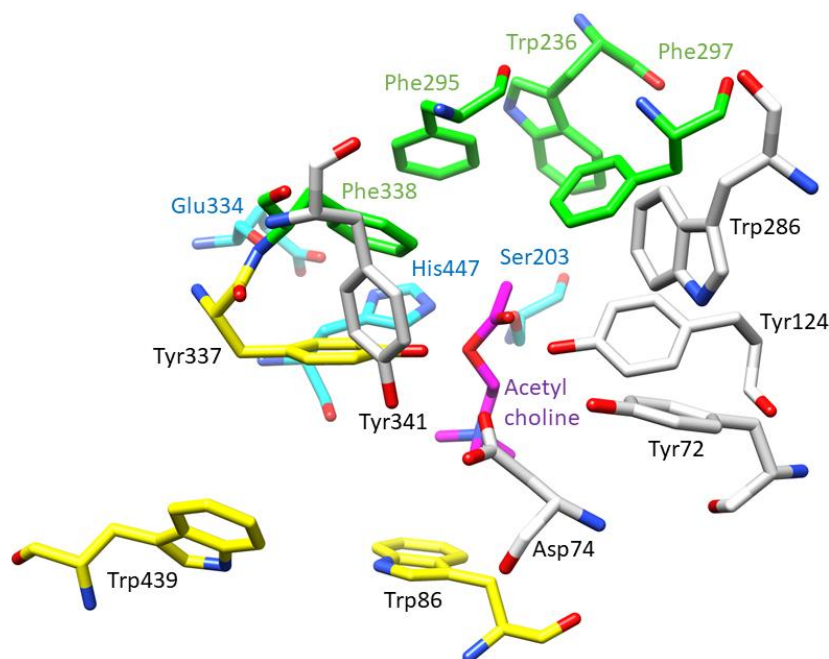

**Figure S2:** Acetylcholine (the natural substrate) docked into the active site of *hAChE*.

Binding of huprine W to *hAChE* (Figure S3) is characterised by the following features:

- i) (7*S*,11*S*)-isomers of huprines, like huprine W, perfectly match the molecular surface of the active site gorge.<sup>[12–14]</sup> Chloroquinolinium moiety of huprines is sandwiched between Trp86 and Tyr337 of the choline-binding pocket. Further, Phe338, Phe295, and Trp236 of the acyl-binding pocket extend an aromatic stacking pile.
- ii) Additional interactions include those of the polarised chlorine substituent with Trp439.<sup>[13]</sup>
- iii) The delocalized positive charge of protonated huprines reinforces interactions with the  $\pi$  electrons of Trp86 and Tyr337.<sup>[12]</sup>
- iv) Further, there is a hydrogen bond between the protonated quinolinium nitrogen and the main chain carbonyl of His447 of the catalytic triad.<sup>[13]</sup>
- v) The aniline nitrogen of huprines is stabilized by a hydrogen bond network that involves two structural water molecules conserved among most cholinesterases.<sup>[12]</sup>
- vi) The hydroxyl group of huprines is hydrogen-bonded to both the catalytic Ser203 residue and Gly122 in the oxyanion hole.<sup>[13]</sup>

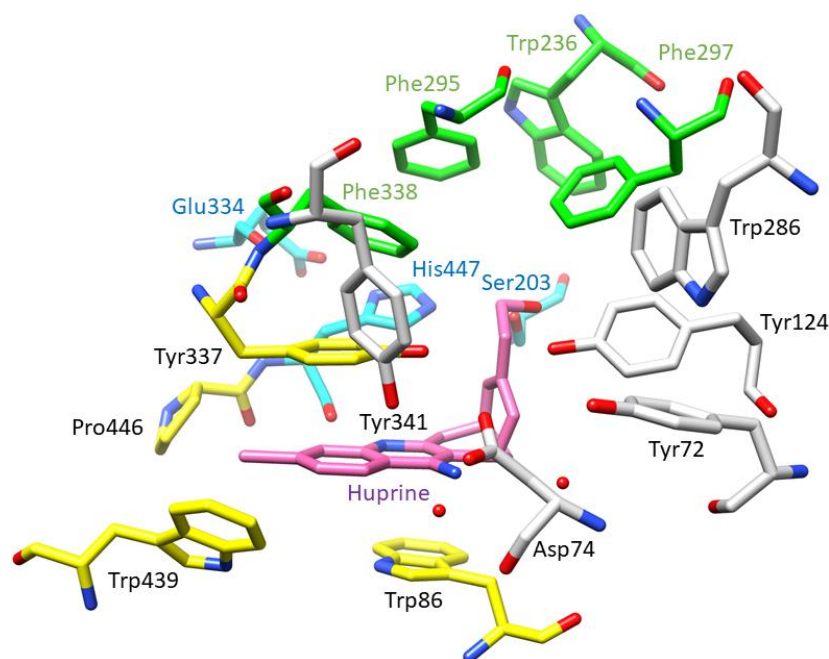

**Figure S3:** Complex of huprine W with *hAChE* (PDB id: 4bdt). The (7*S*,11*S*)-isomer of huprine perfectly matches the molecular surface of the active site. Chloroquinolinium moiety of huprine is sandwiched between Trp86 and Tyr337 of the choline-binding pocket. Further, Phe338, Phe295, and Trp236 of the acyl-binding pocket extend an aromatic stacking pile. Additional interactions include those of the polarized chlorine substituent with Trp439. The delocalized positive charge of protonated huprines reinforces interactions with the  $\pi$ -electrons of Trp86 and Tyr337. Further, there is a hydrogen bond between the protonated quinolinium nitrogen and the main chain carbonyl of His447 of the catalytic triad. The aniline nitrogen of huprines is stabilized by a hydrogen bond network that involves two structural water molecules conserved among most cholinesterases. The hydroxyl group of huprines is hydrogen-bonded to both the catalytic Ser203 residue and Gly122 in the oxyanion hole.



## 9. References

- [1] S. A. Snyder, D. S. Treitler, A. P. Brucks, *J. Am. Chem. Soc.* **2010**, *132*, 14303–14314.
- [2] J. Mikušek, P. Jansa, P. R. Jagtap, T. Vašíček, I. Císařová, E. Matoušová, *Chem. – Eur. J.* **2018**, *24*, 10069–10072.
- [3] S. C. Nigama, A. Mann, M. Taddei, C.-G. Wermutha, *Synth. Commun.* **1989**, *19*, 3139–3142.
- [4] X. Bao, Q. Wang, J. Zhu, *Angew. Chem. Int. Ed.* **2018**, *57*, 1995–1999.
- [5] A. Kale, N. Medishetti, S. Kanugala, G. K. C, K. Atmakur, *Org. Biomol. Chem.* **2019**, *17*, 3186–3194.
- [6] G. L. Ellman, K. D. Courtney, V. Andres, R. M. Featherstone, *Biochem. Pharmacol.* **1961**, *7*, 88–95.
- [7] W. Humphrey, A. Dalke, K. Schulten, *J. Mol. Graph.* **1996**, *14*, 33–38.
- [8] O. Trott, A. J. Olson, *J. Comput. Chem.* **2010**, *31*, 455–461.
- [9] E. F. Pettersen, T. D. Goddard, C. C. Huang, G. S. Couch, D. M. Greenblatt, E. C. Meng, T. E. Ferrin, *J. Comput. Chem.* **2004**, *25*, 1605–1612.
- [10] “CGenFF Home,” can be found under <https://cgenff.umaryland.edu/>, **2022**.
- [11] J. C. Phillips, R. Braun, W. Wang, J. Gumbart, E. Tajkhorshid, E. Villa, C. Chipot, R. D. Skeel, L. Kalé, K. Schulten, *J. Comput. Chem.* **2005**, *26*, 1781–1802.
- [12] C. Ronco, R. Foucault, E. Gillon, P. Bohn, F. Nachon, L. Jean, P.-Y. Renard, *ChemMedChem* **2011**, *6*, 876–888.
- [13] F. Nachon, E. Carletti, C. Ronco, M. Trovaslet, Y. Nicolet, L. Jean, P.-Y. Renard, *Biochem. J.* **2013**, *453*, 393–399.
- [14] T. L. Rosenberry, X. Brazzolotto, I. R. Macdonald, M. Wandhammer, M. Trovaslet-Leroy, S. Darvesh, F. Nachon, *Molecules* **2017**, *22*, 2098.

## 10. Copies of $^1\text{H}$ and $^{13}\text{C}$ NMR spectra

|                                        |         |
|----------------------------------------|---------|
| Data of compounds <b>1-5</b> .....     | SI - 43 |
| Data of compounds <b>6-9</b> .....     | SI - 55 |
| Data of compounds <b>10-13</b> .....   | SI - 70 |
| Data of compounds <b>SI2-SI4</b> ..... | SI - 84 |
| Data of compounds <b>SI5-SI8</b> ..... | SI - 90 |

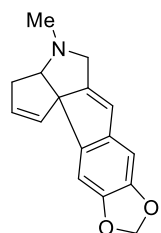**1a**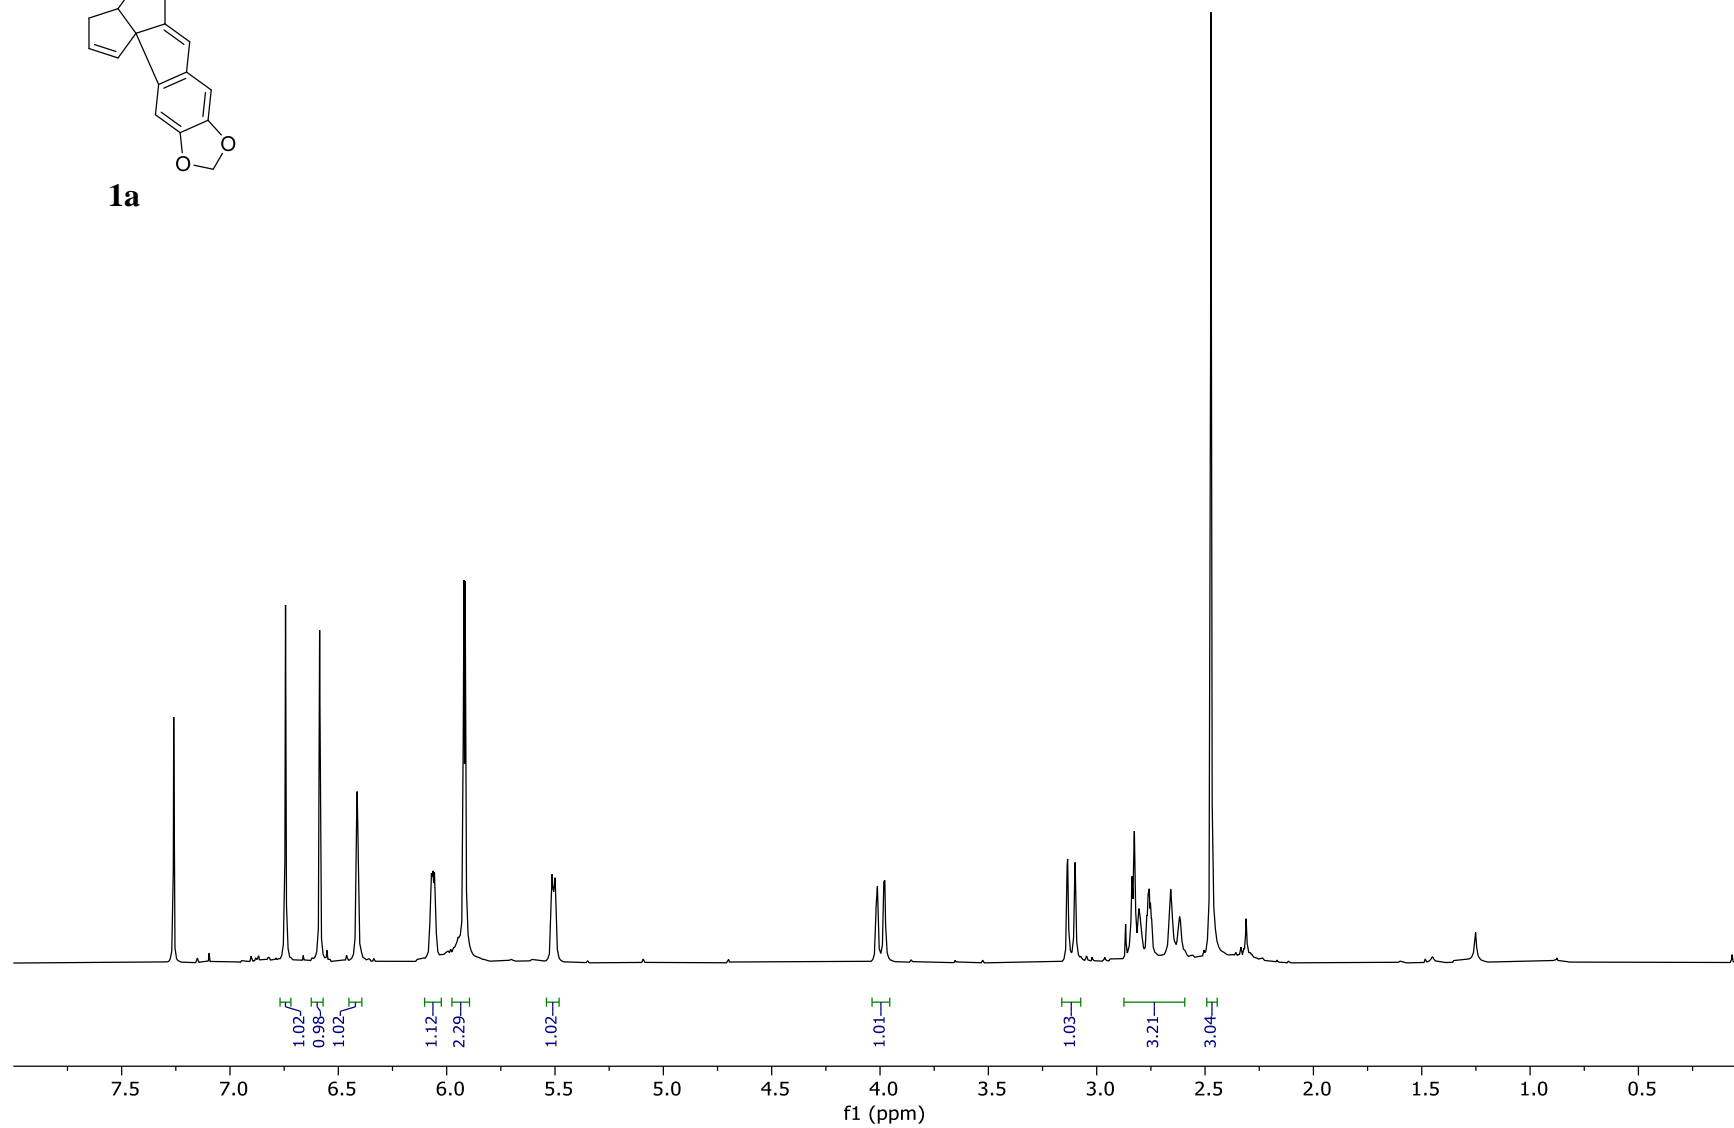

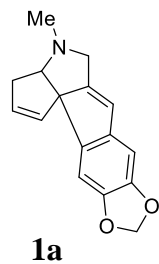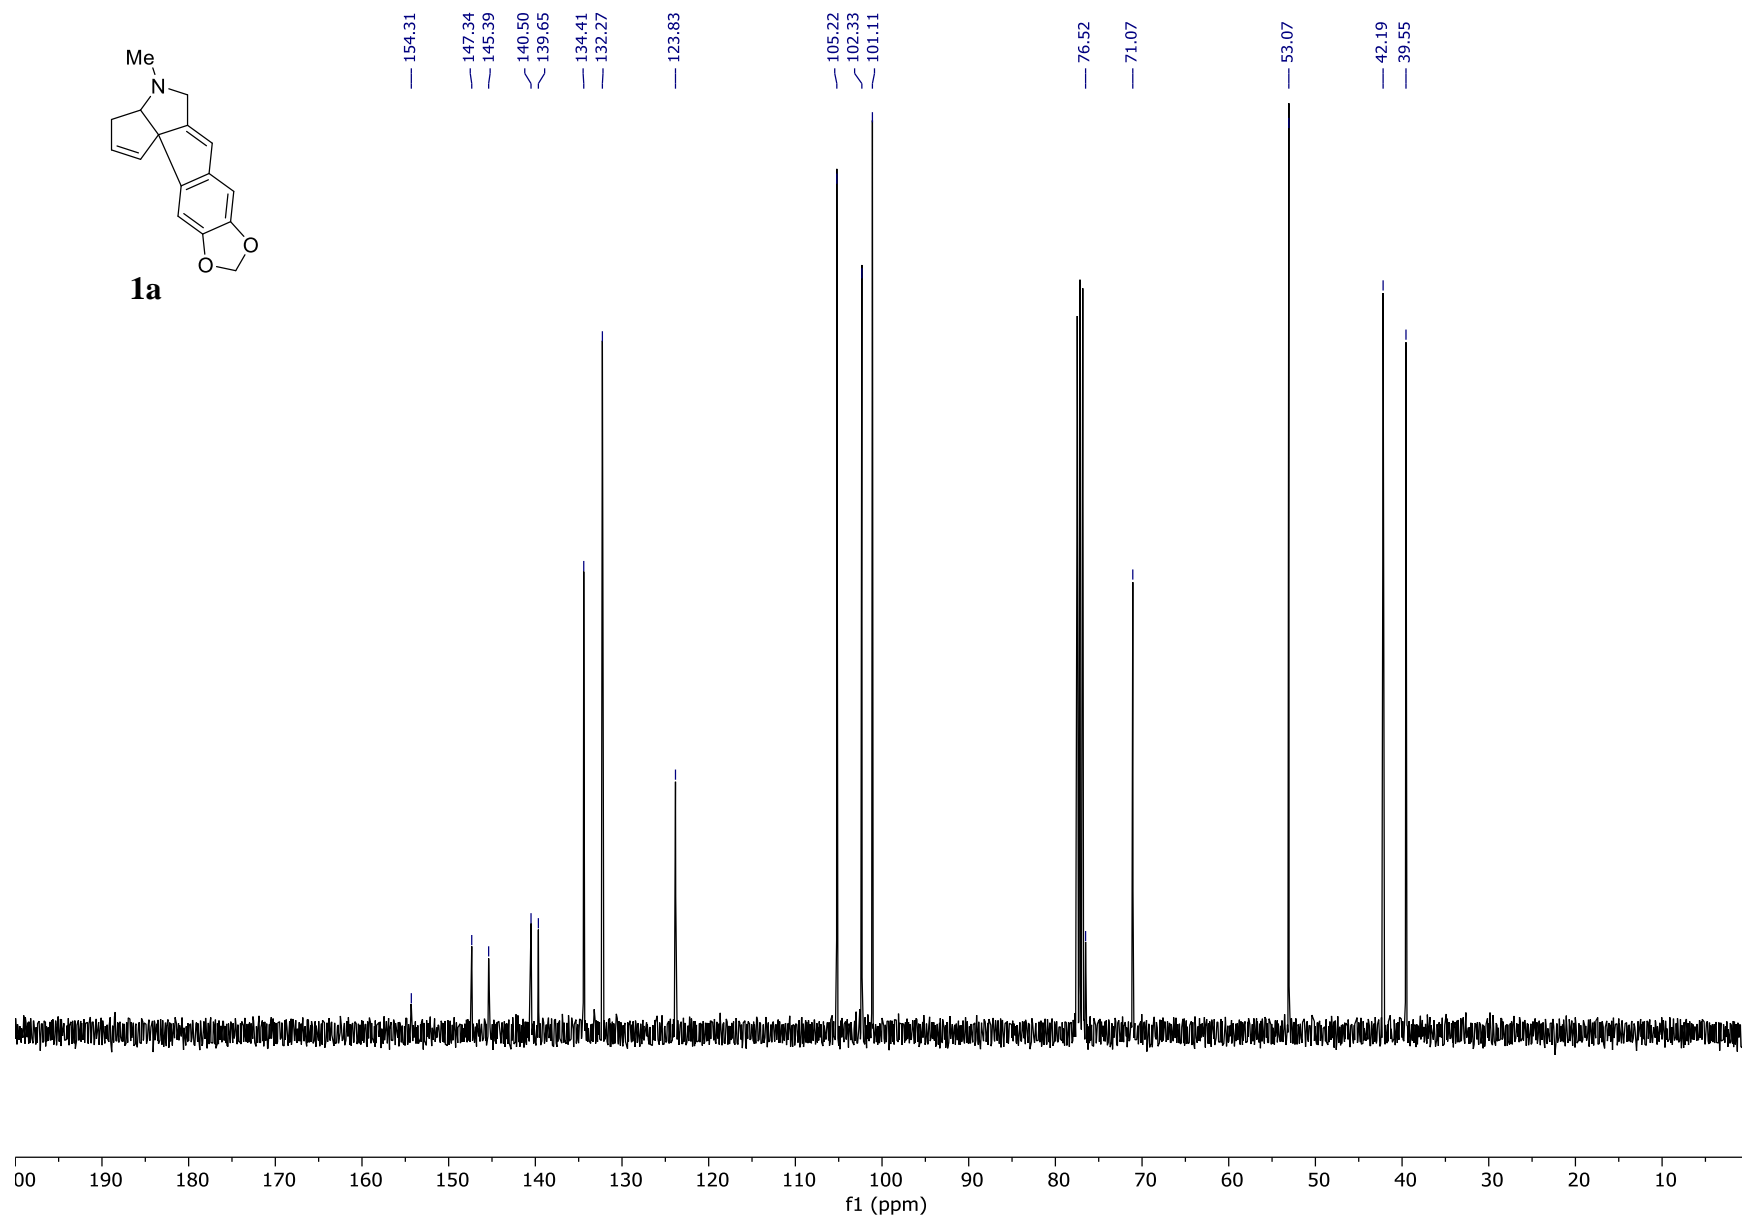

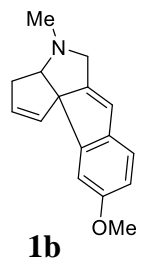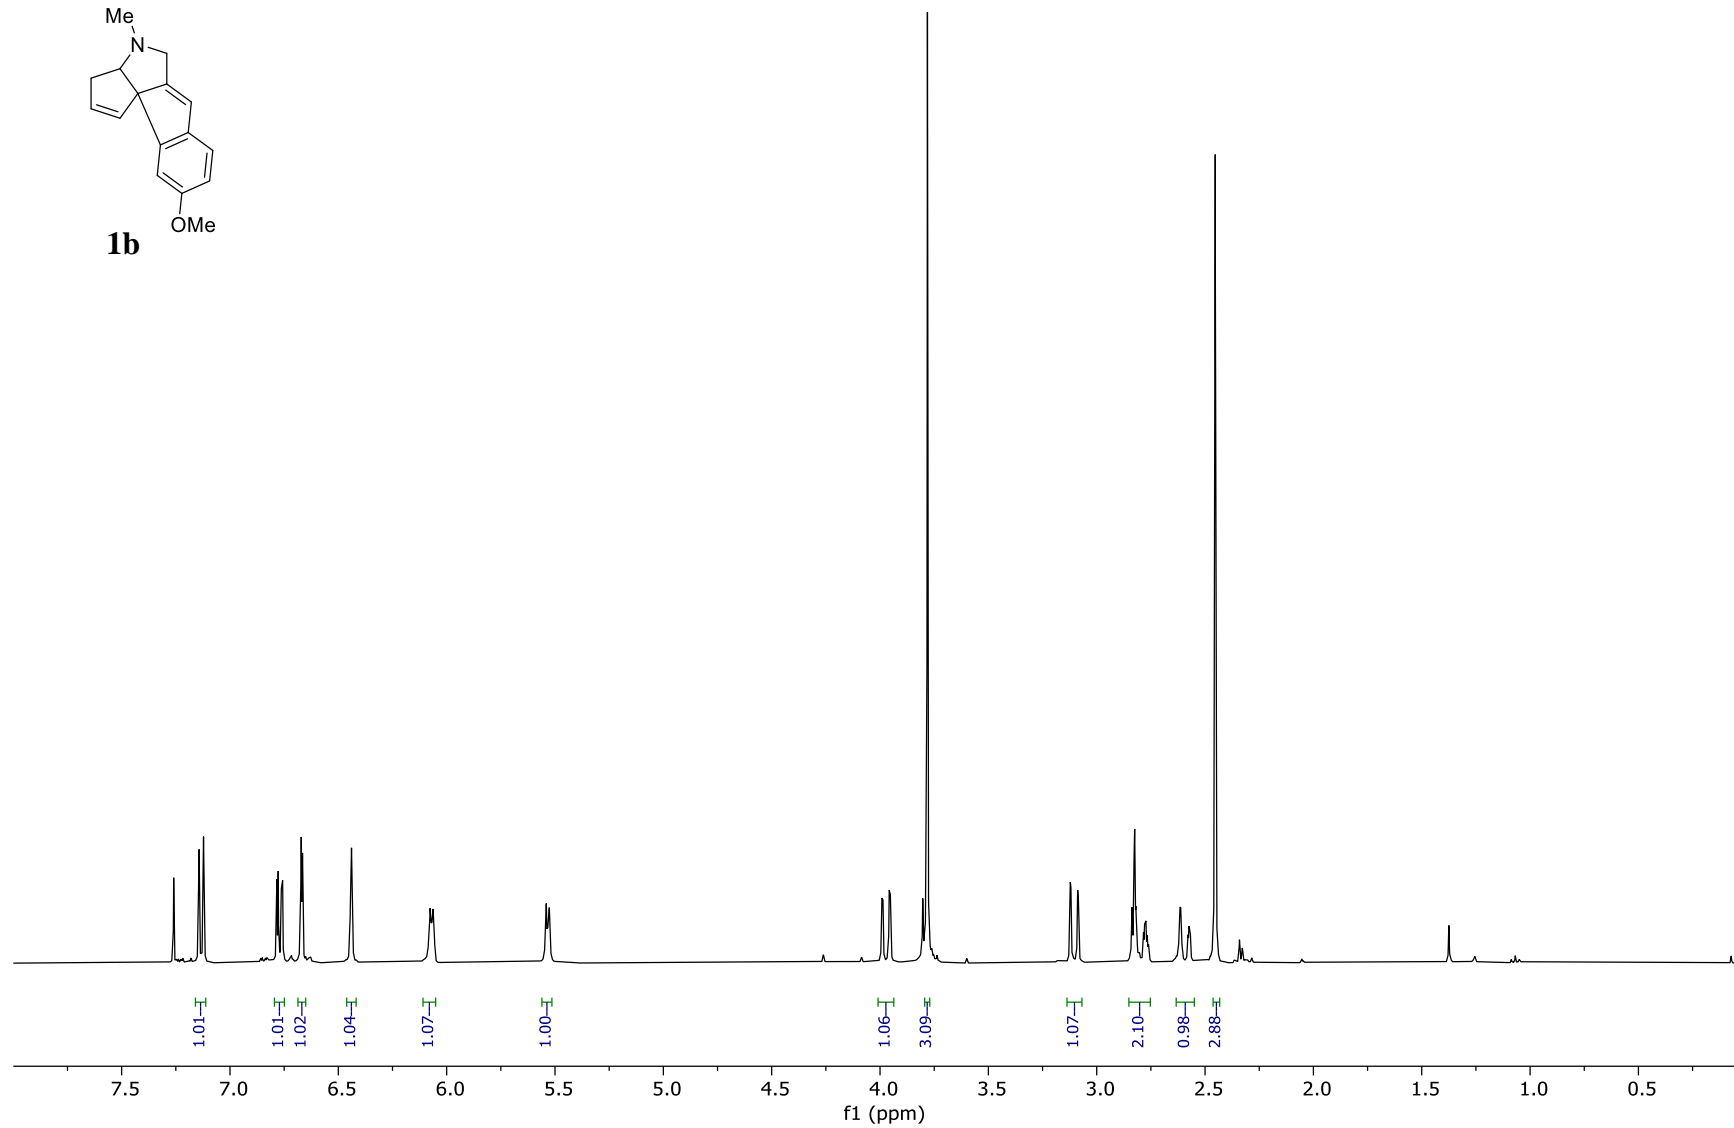

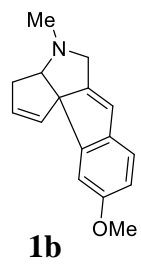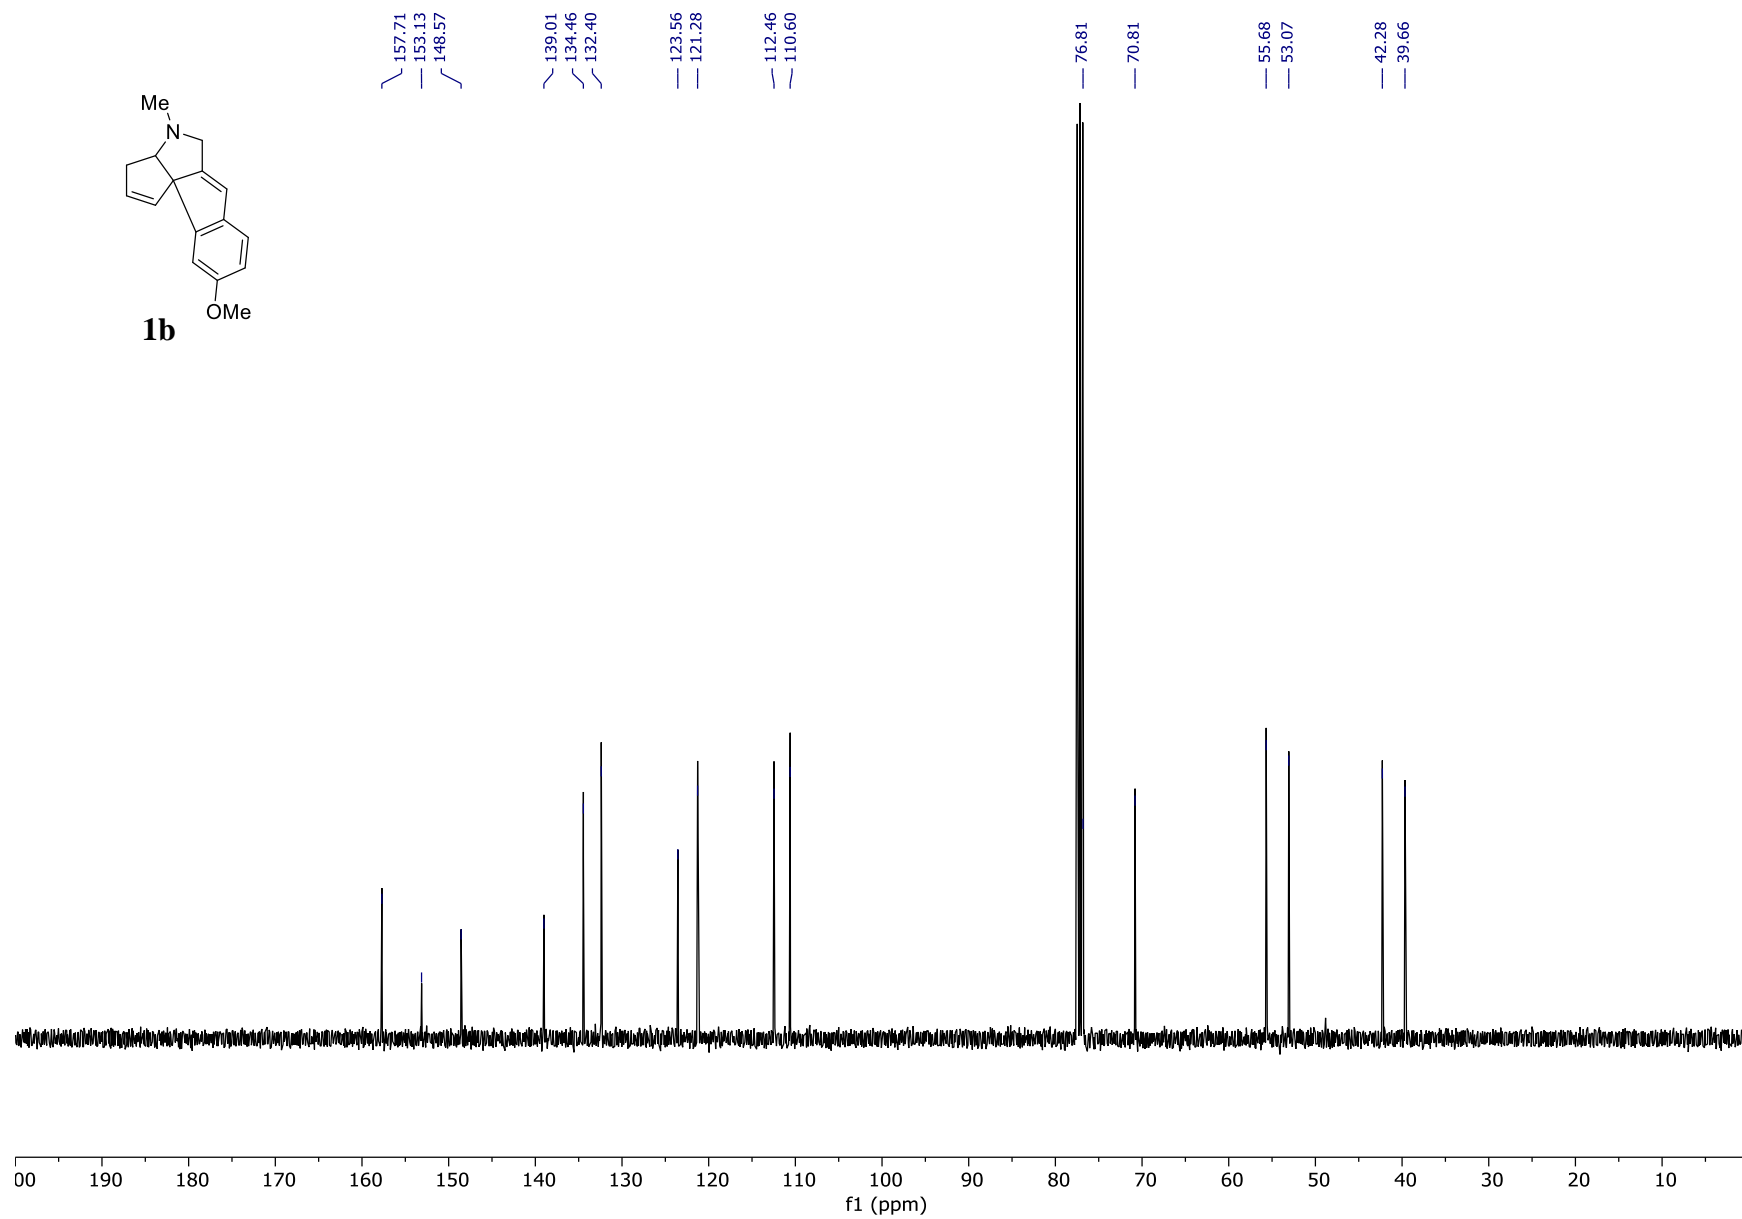

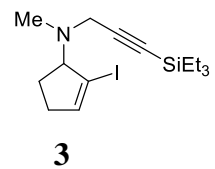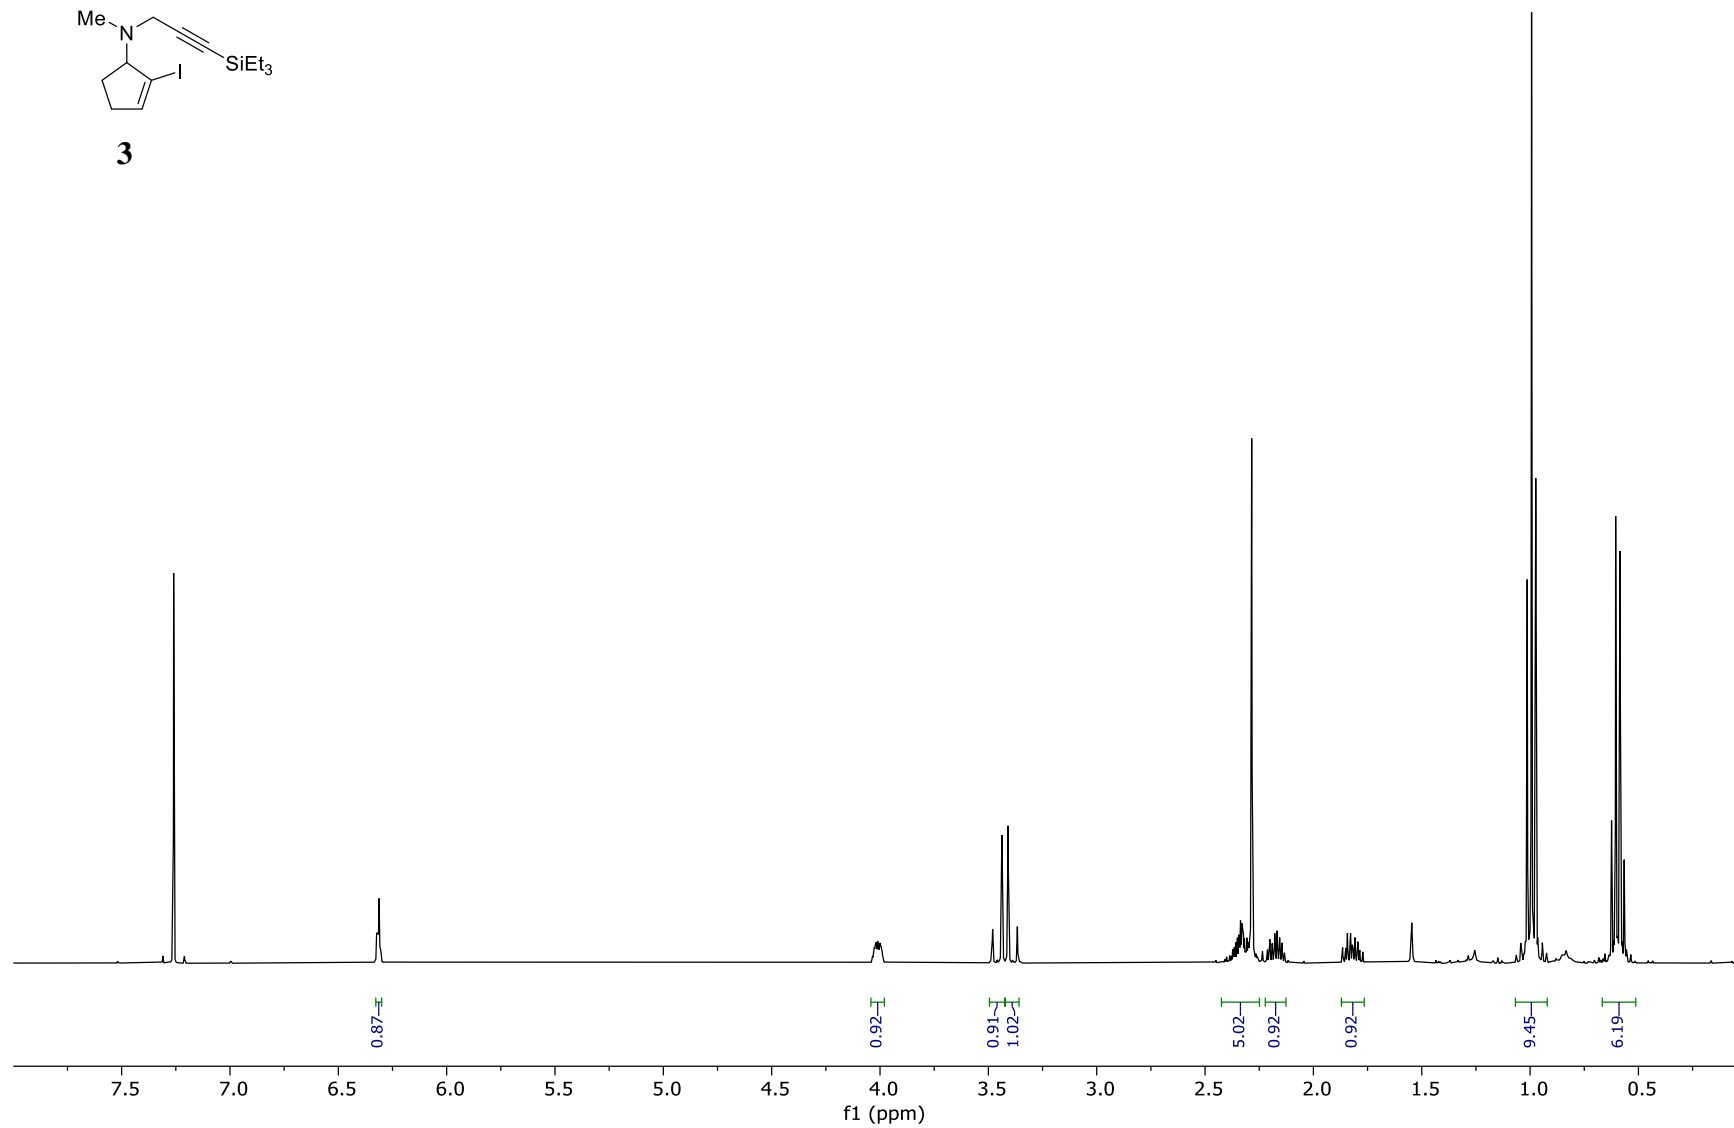

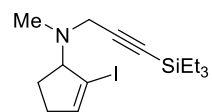**3**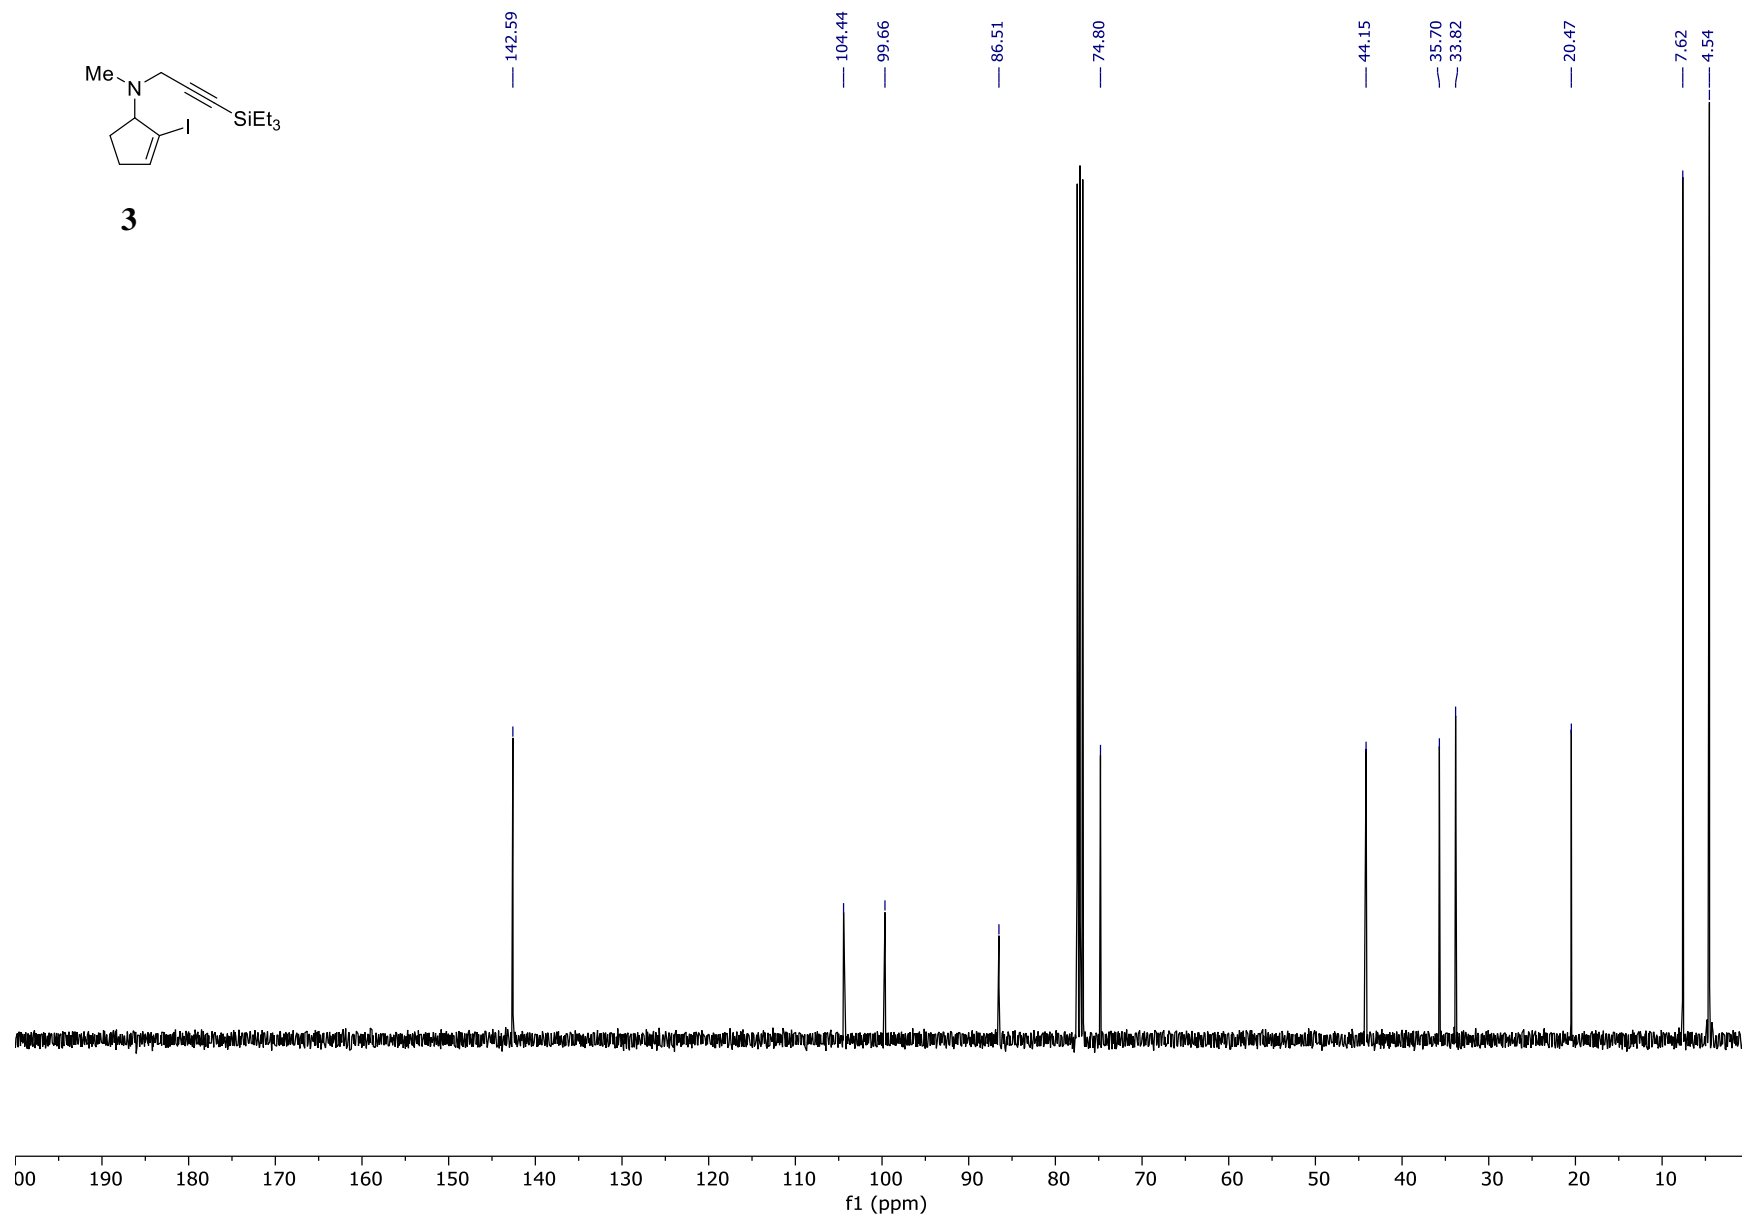



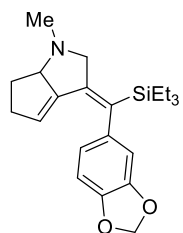**(Z)-4a**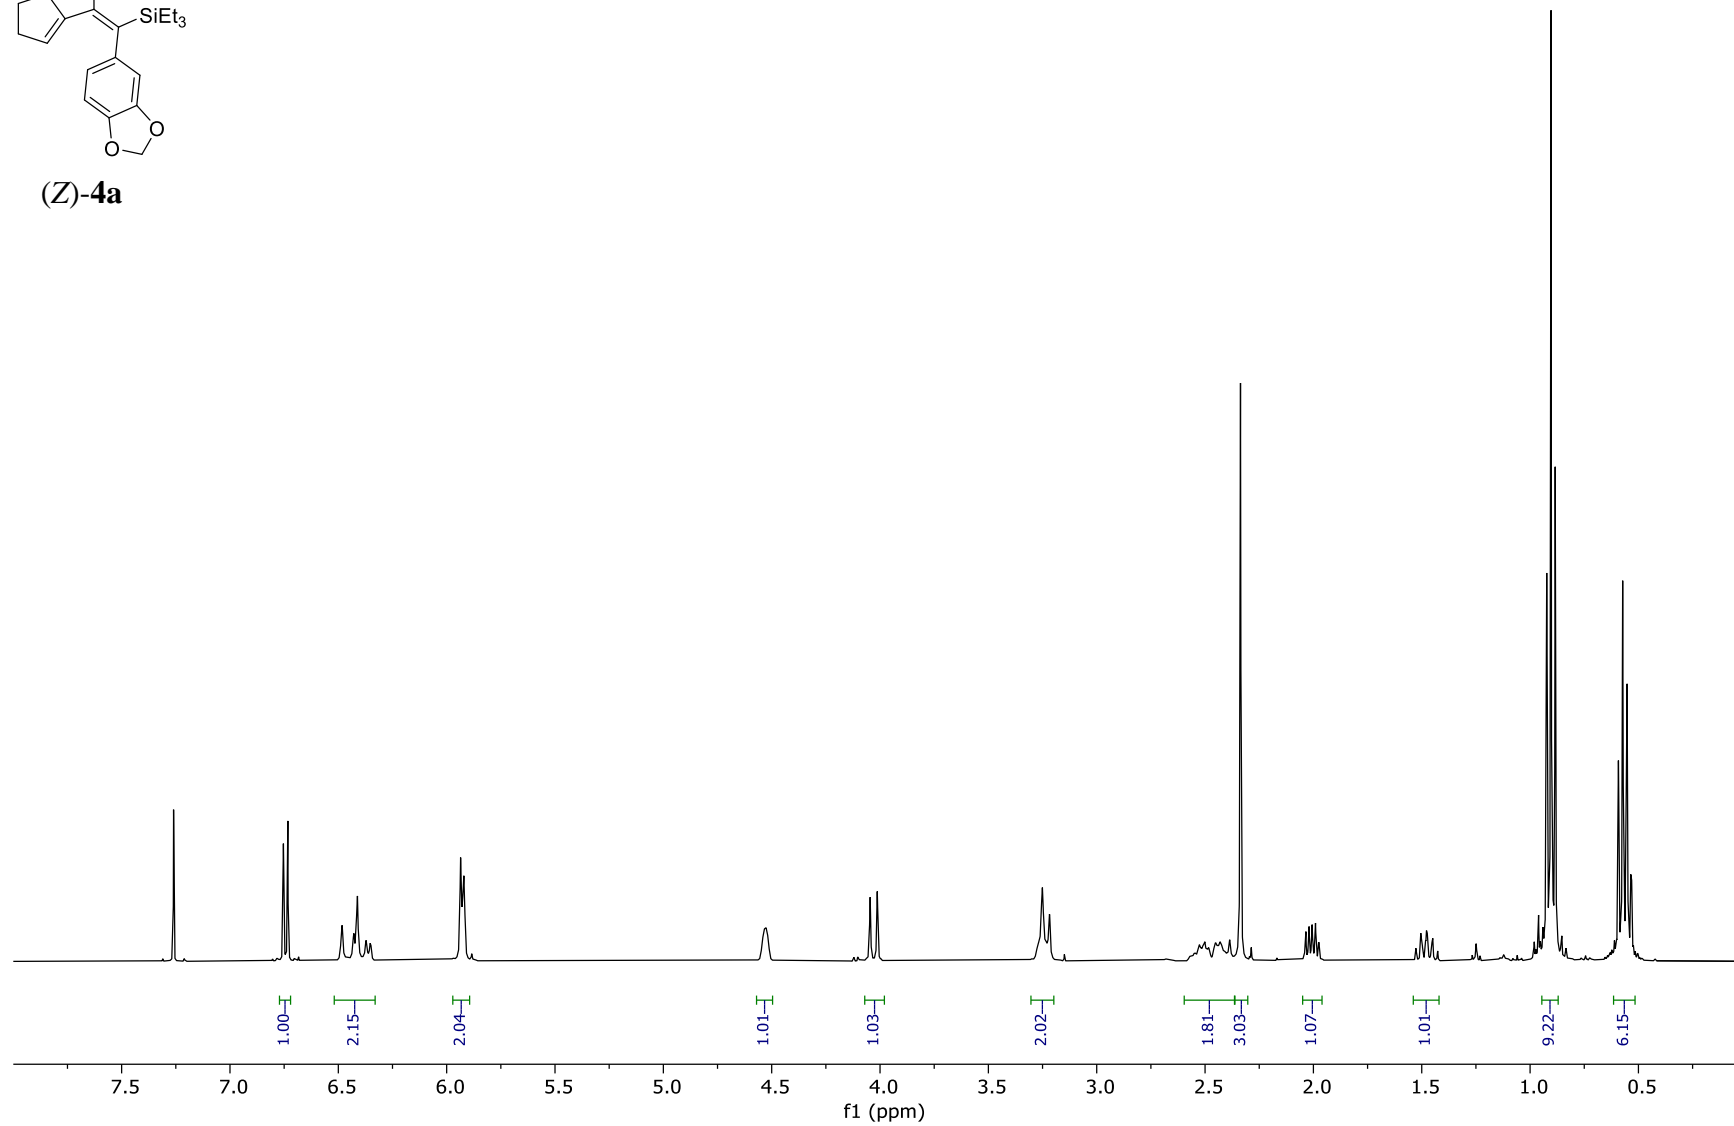

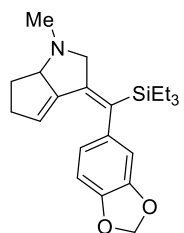**(Z)-4a**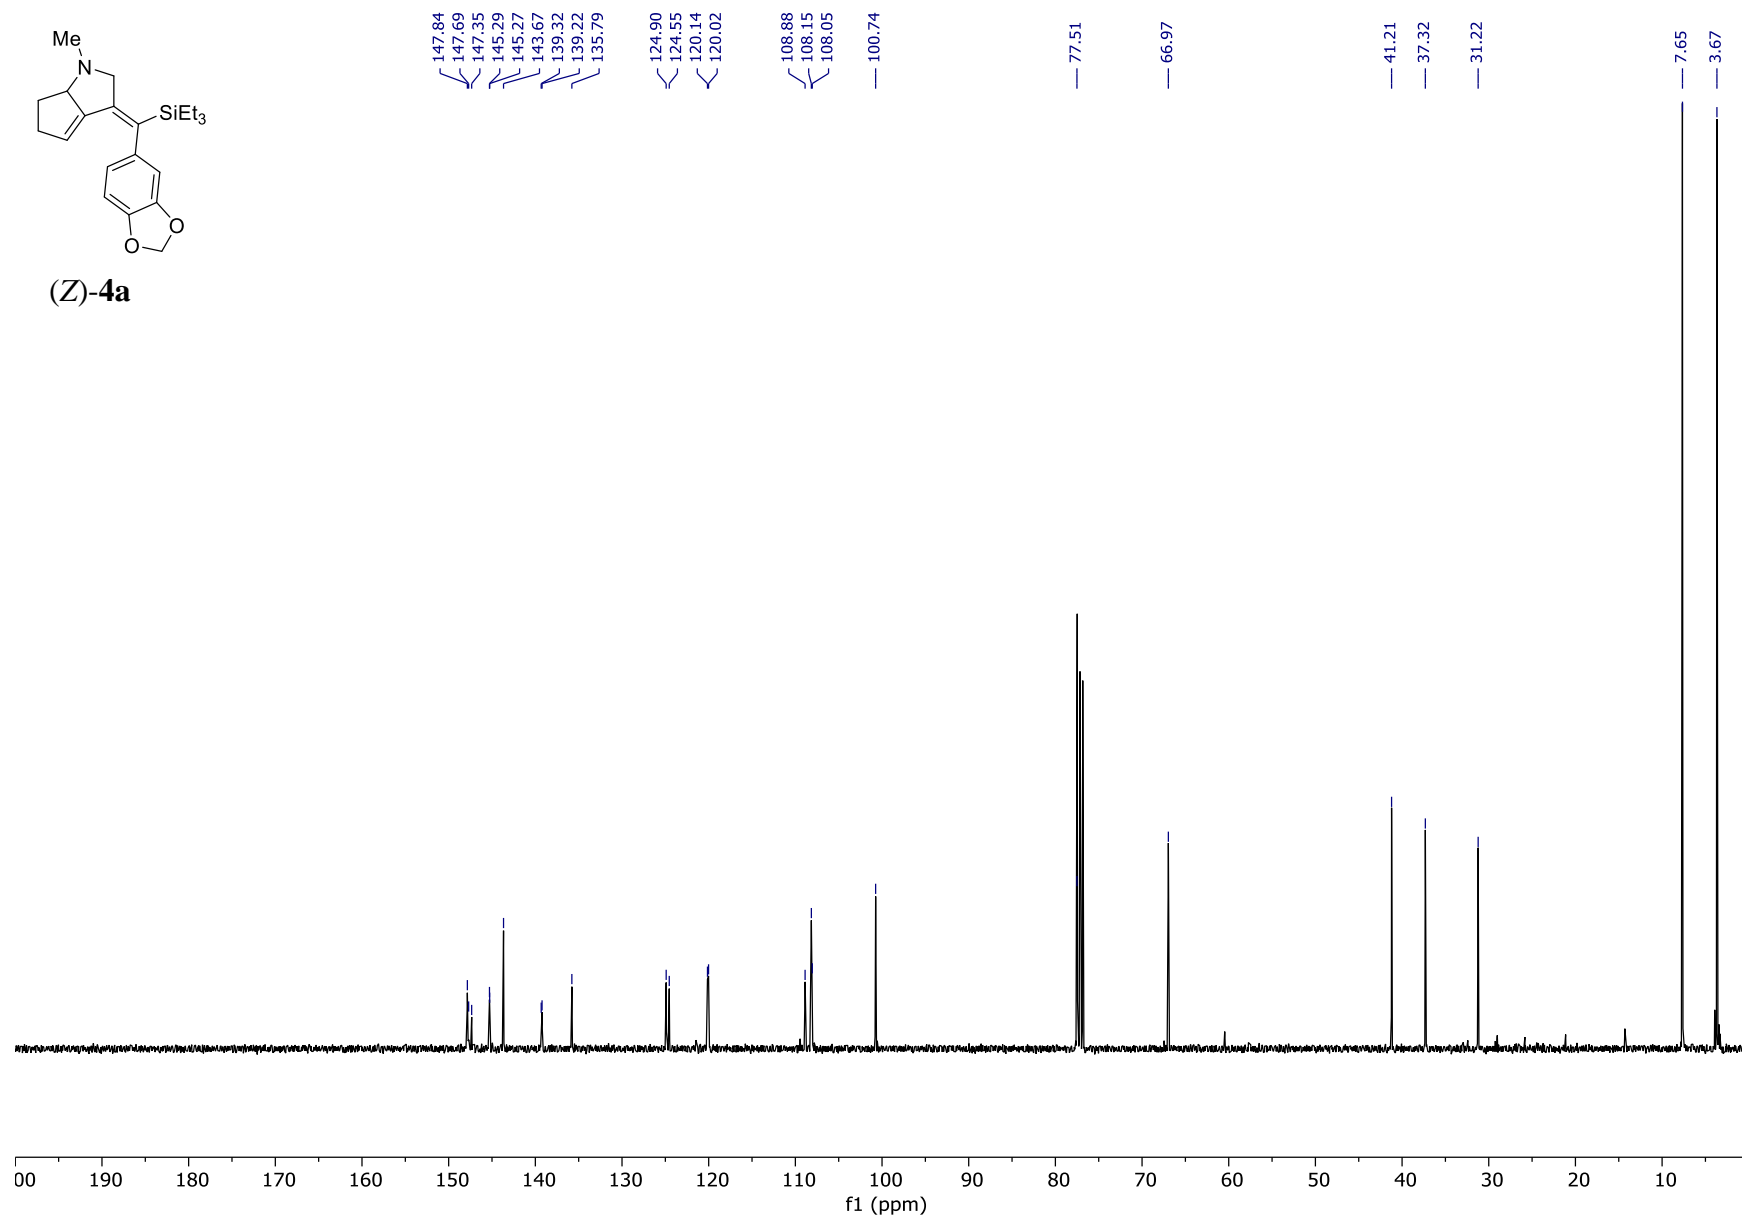

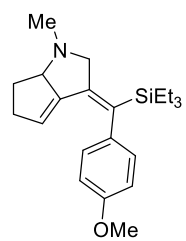**(Z)-4b**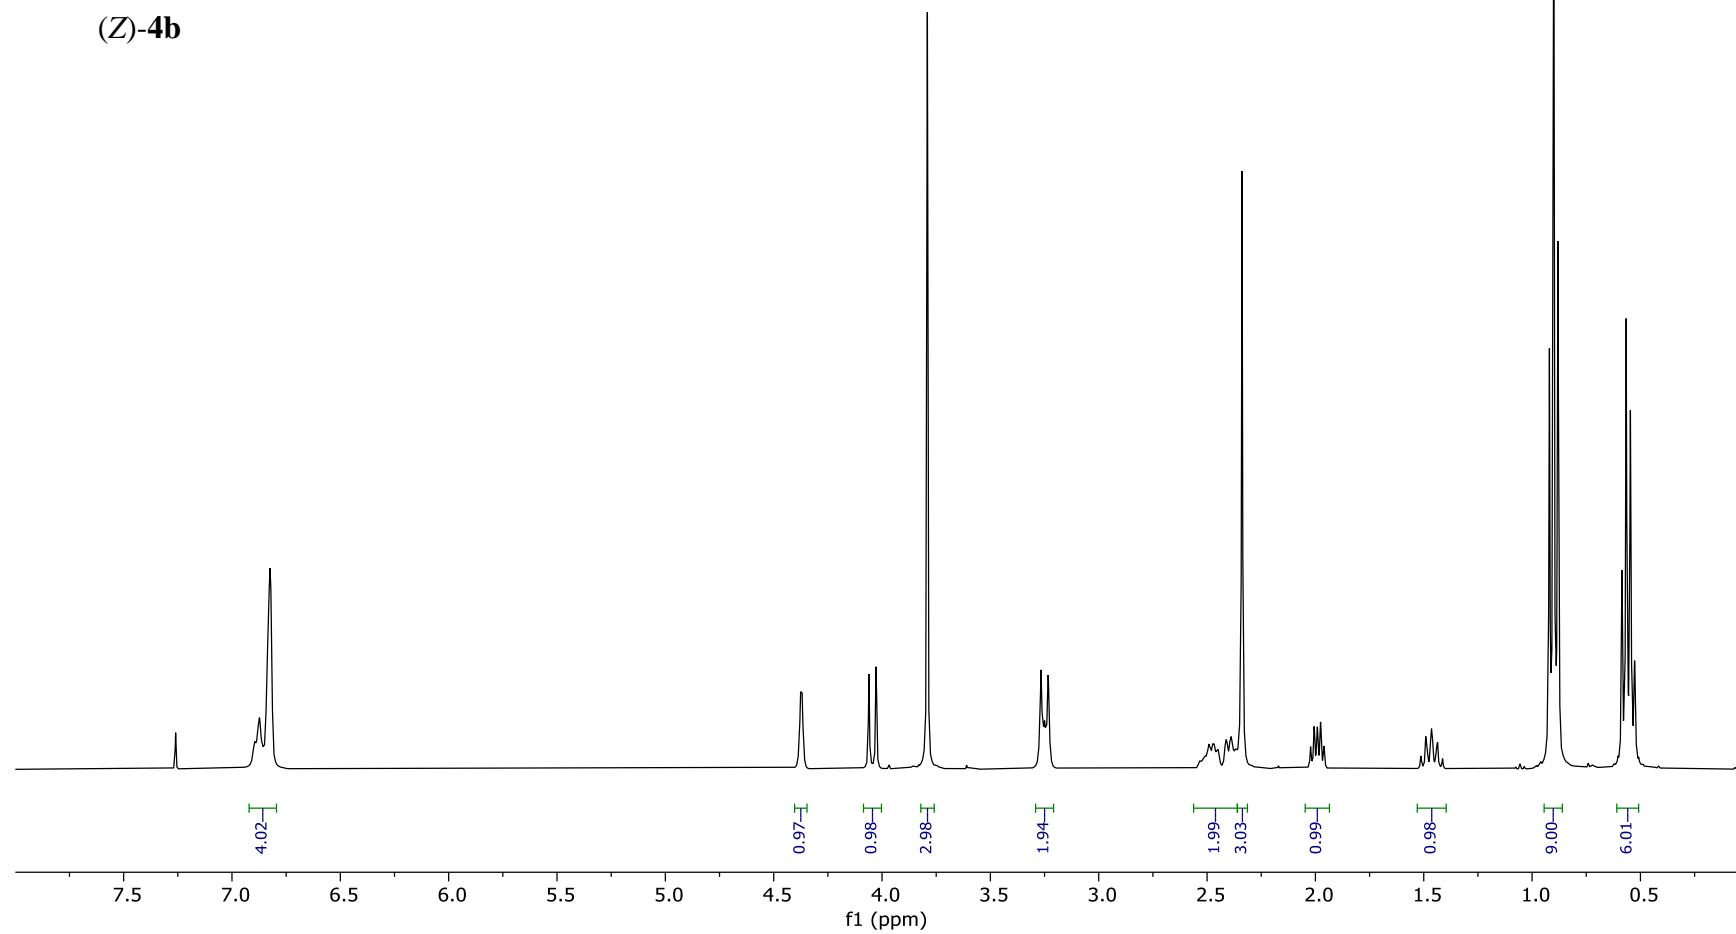

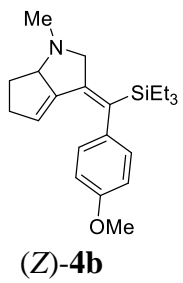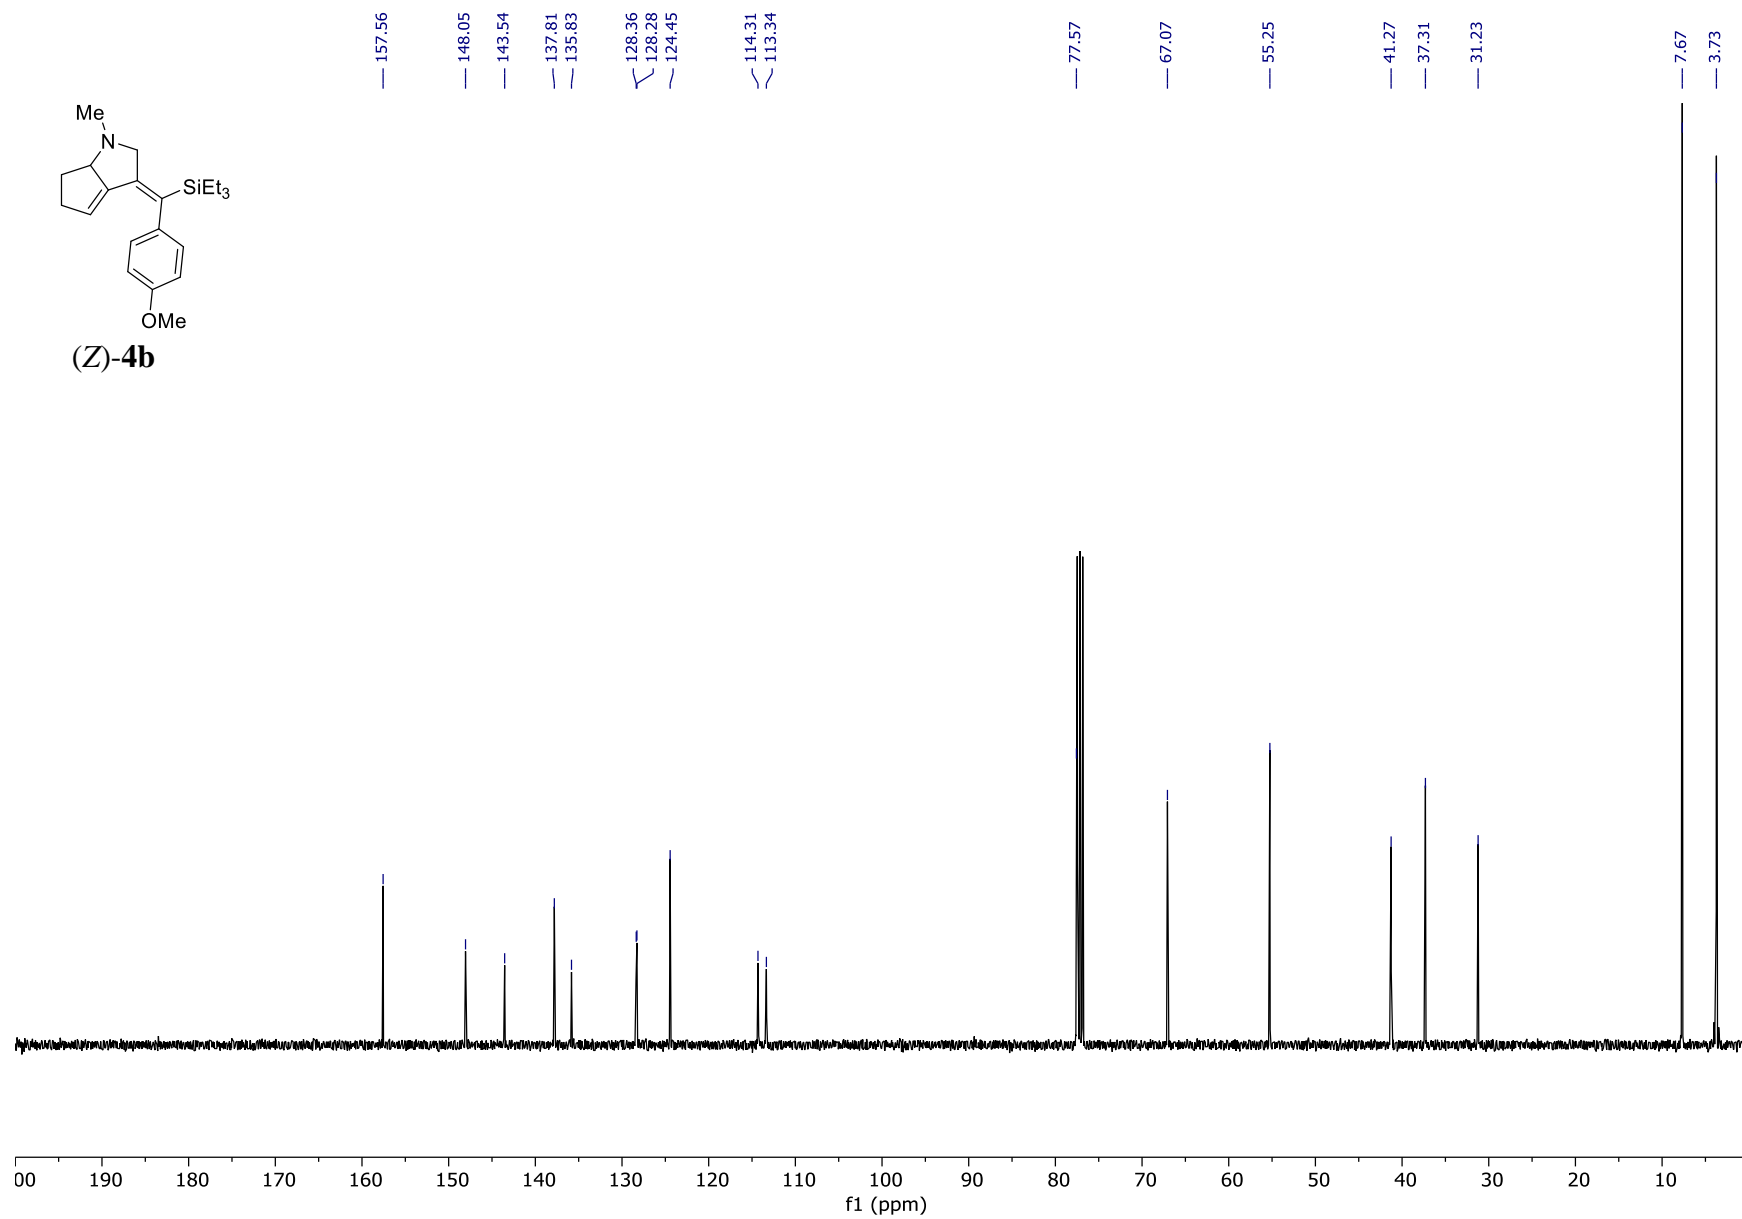

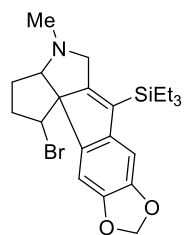**5a**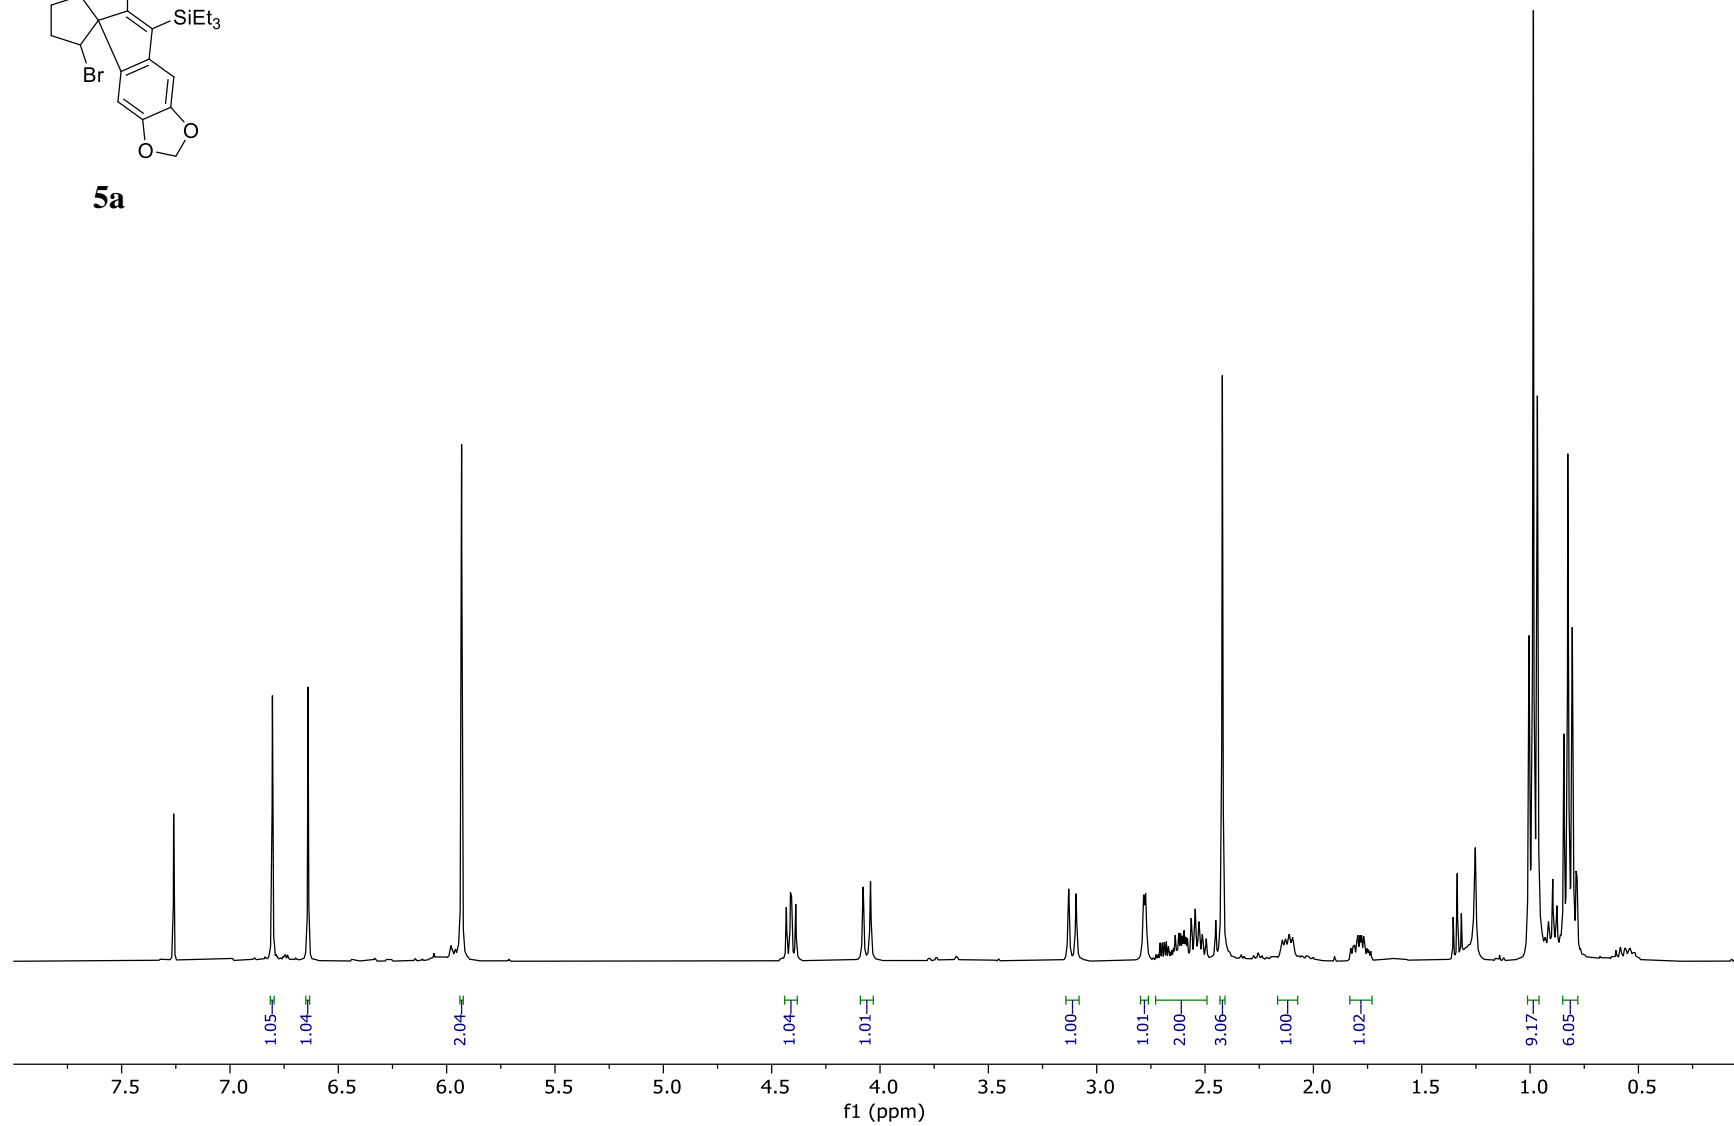

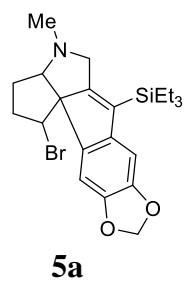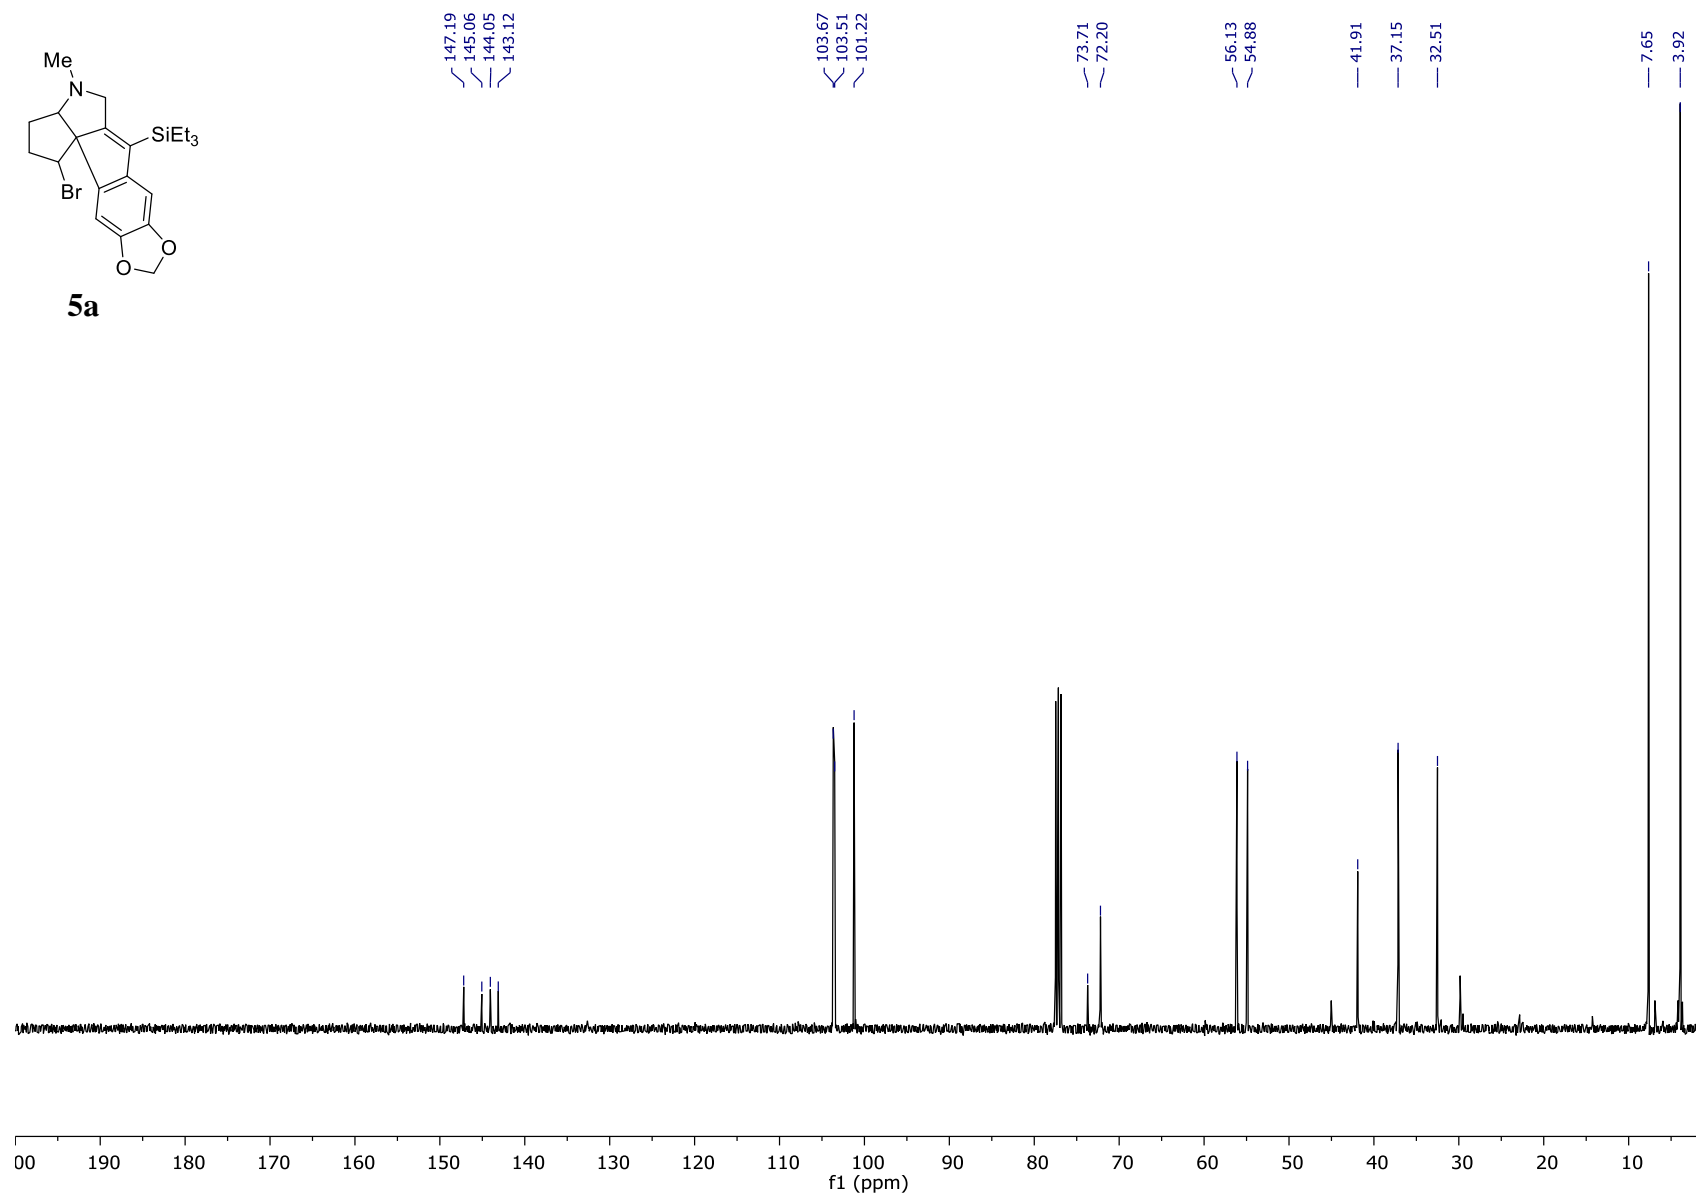

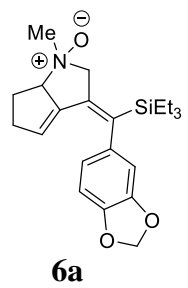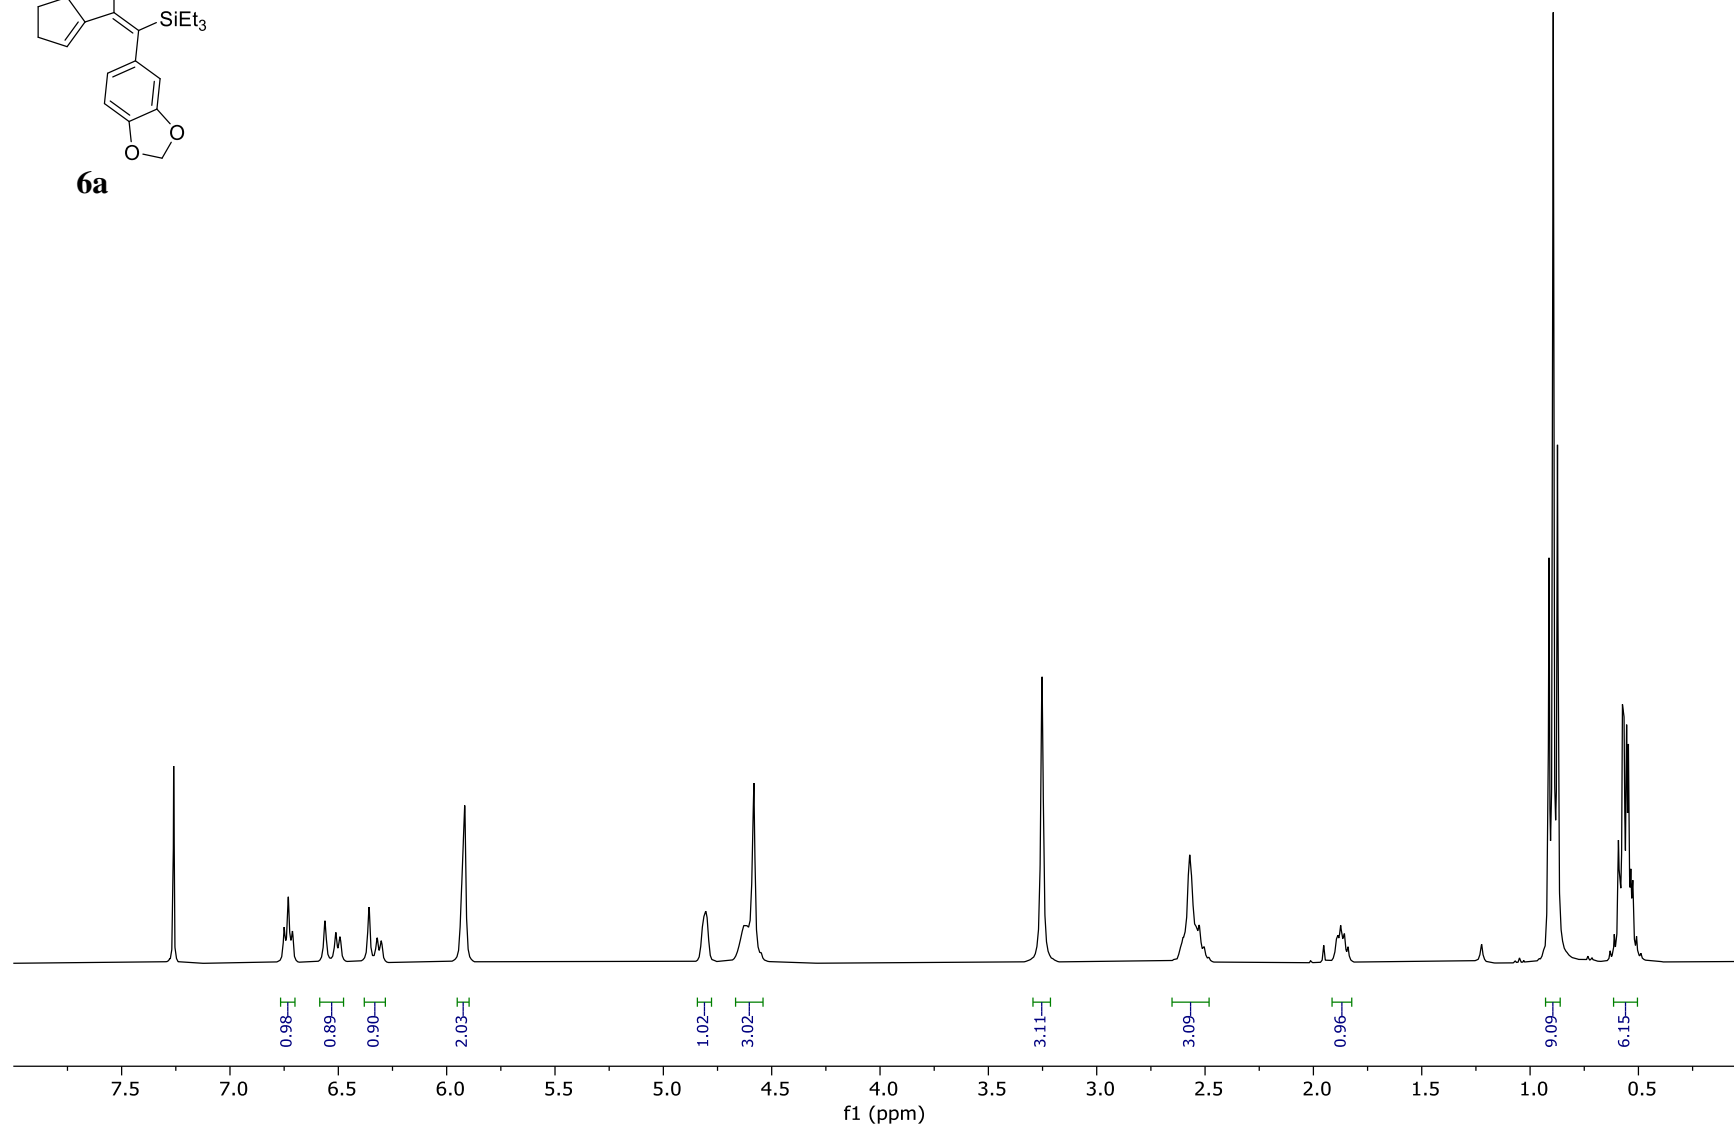

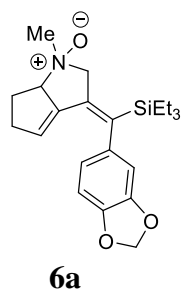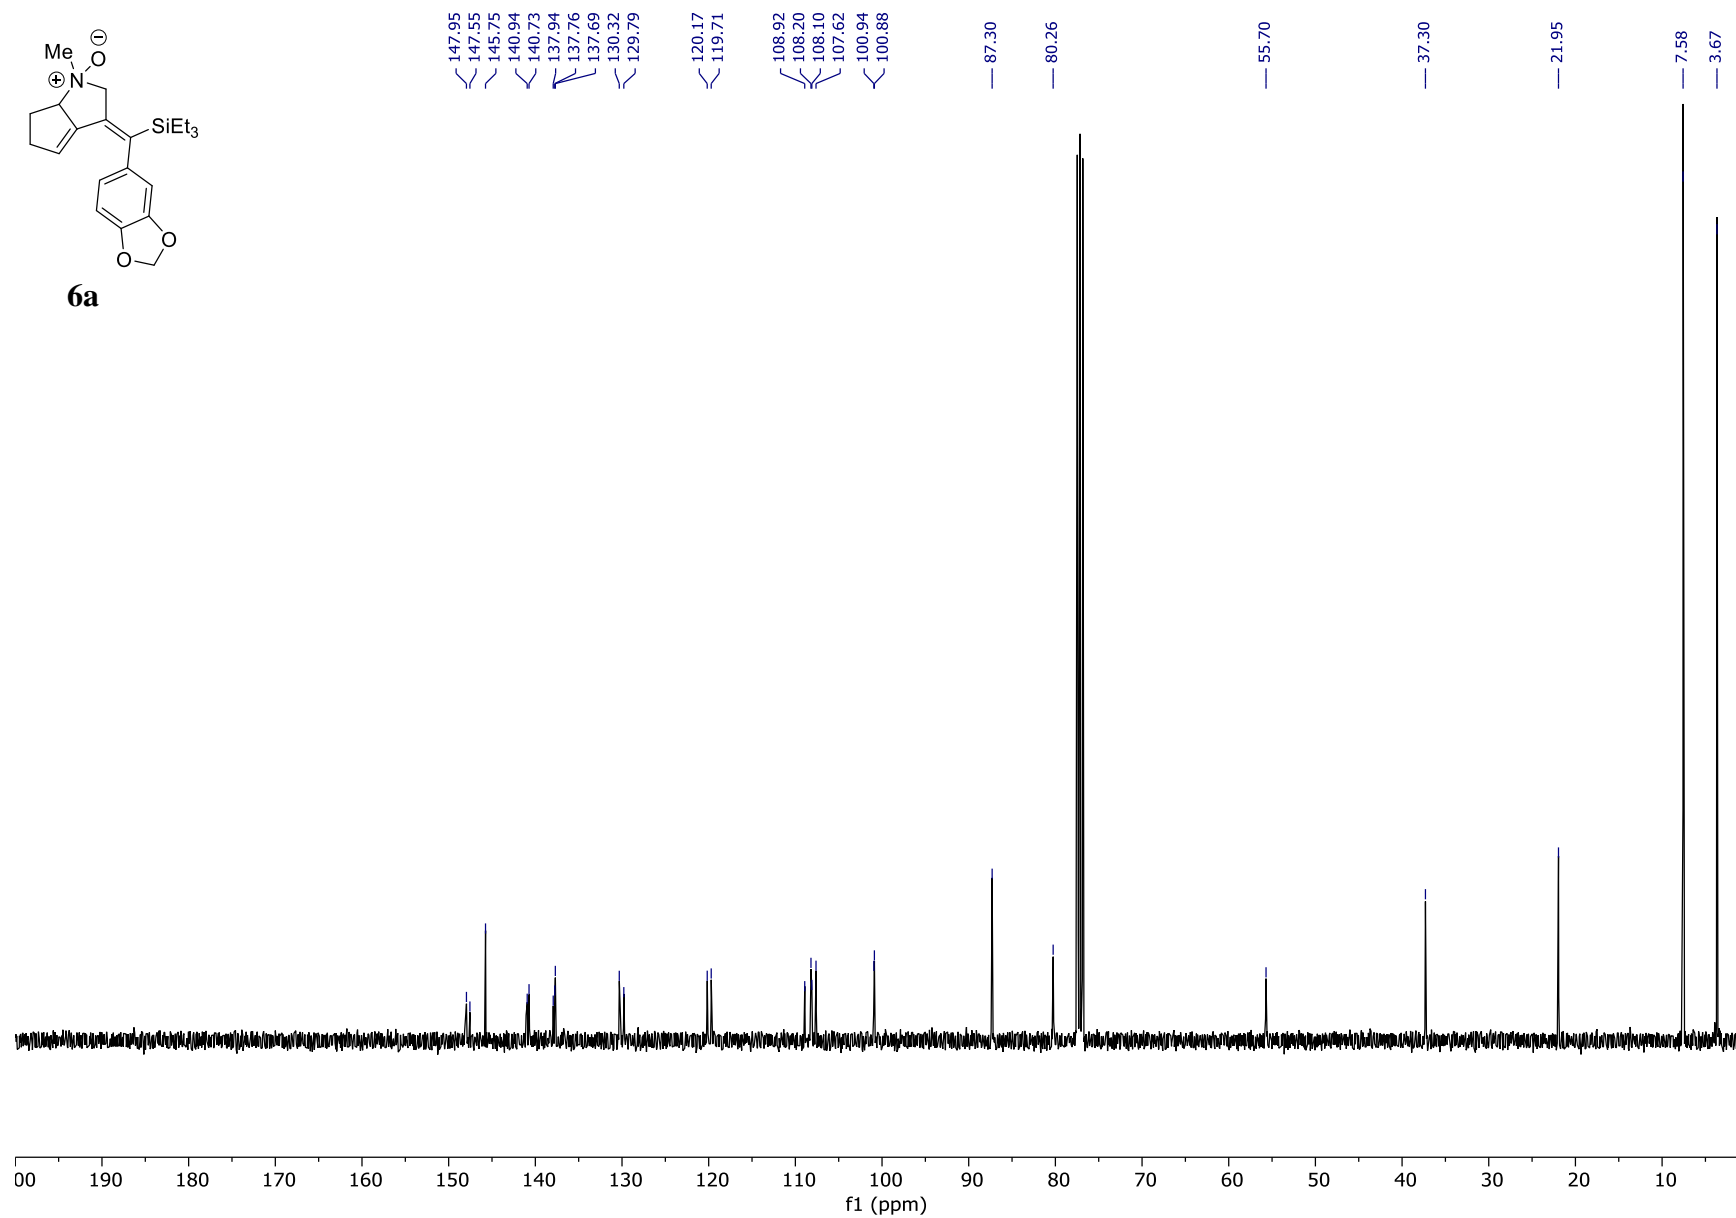



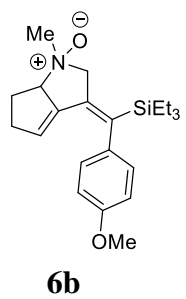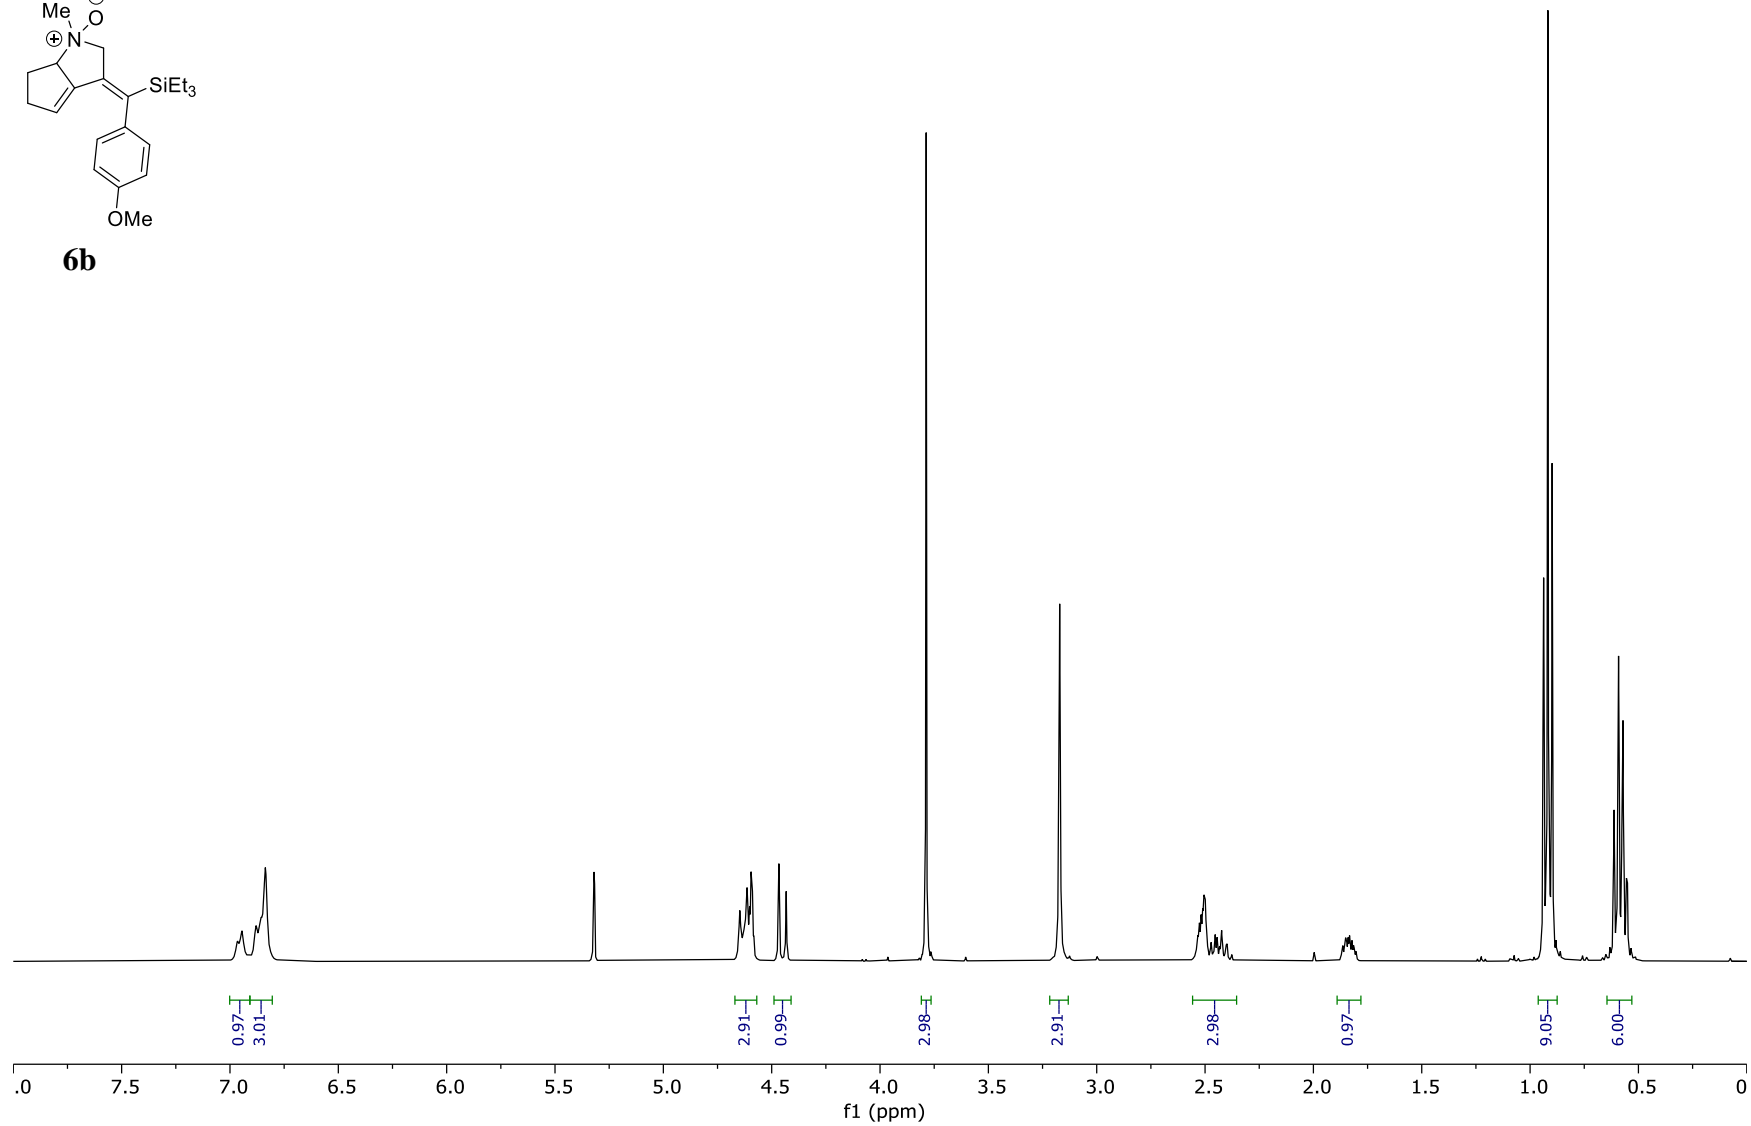

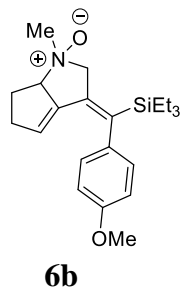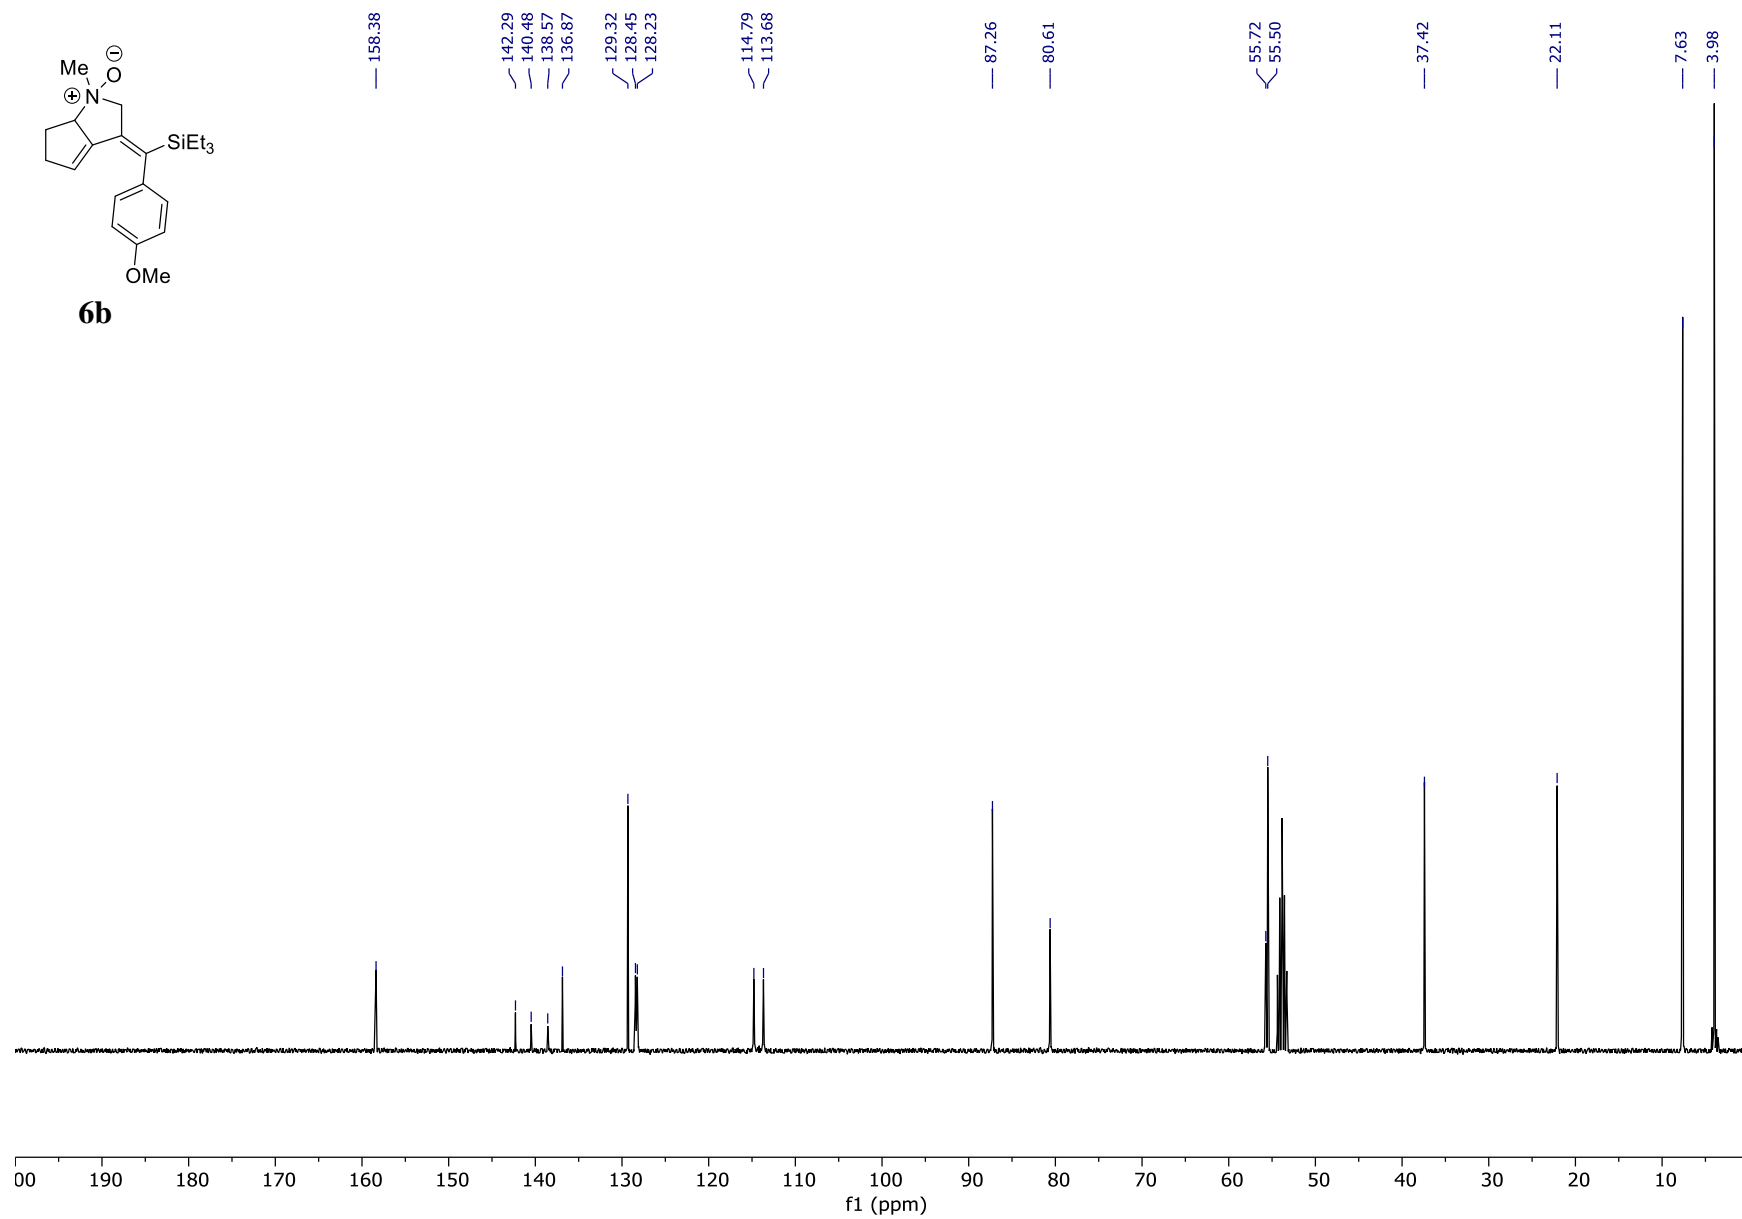

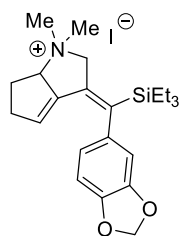**(Z)-6c**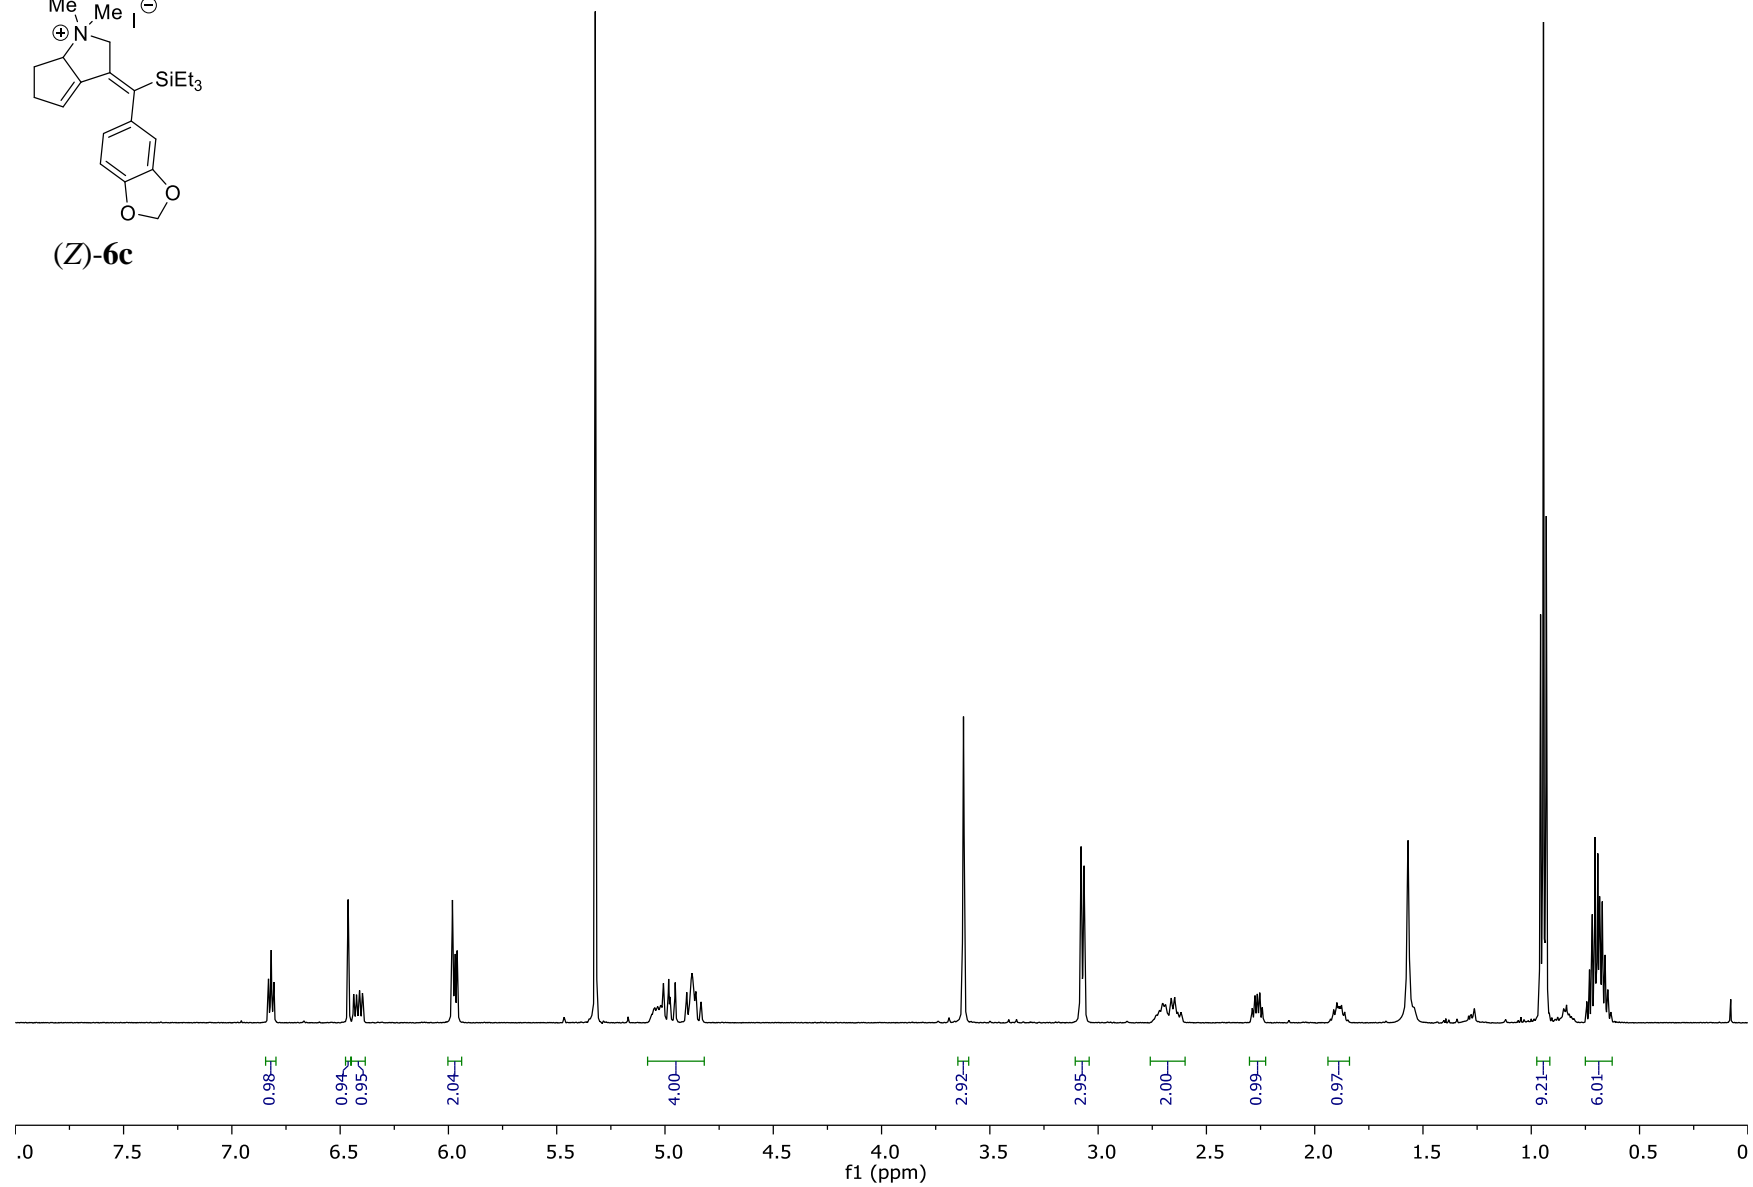

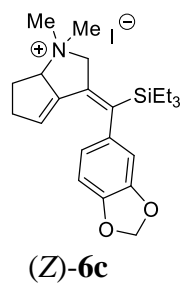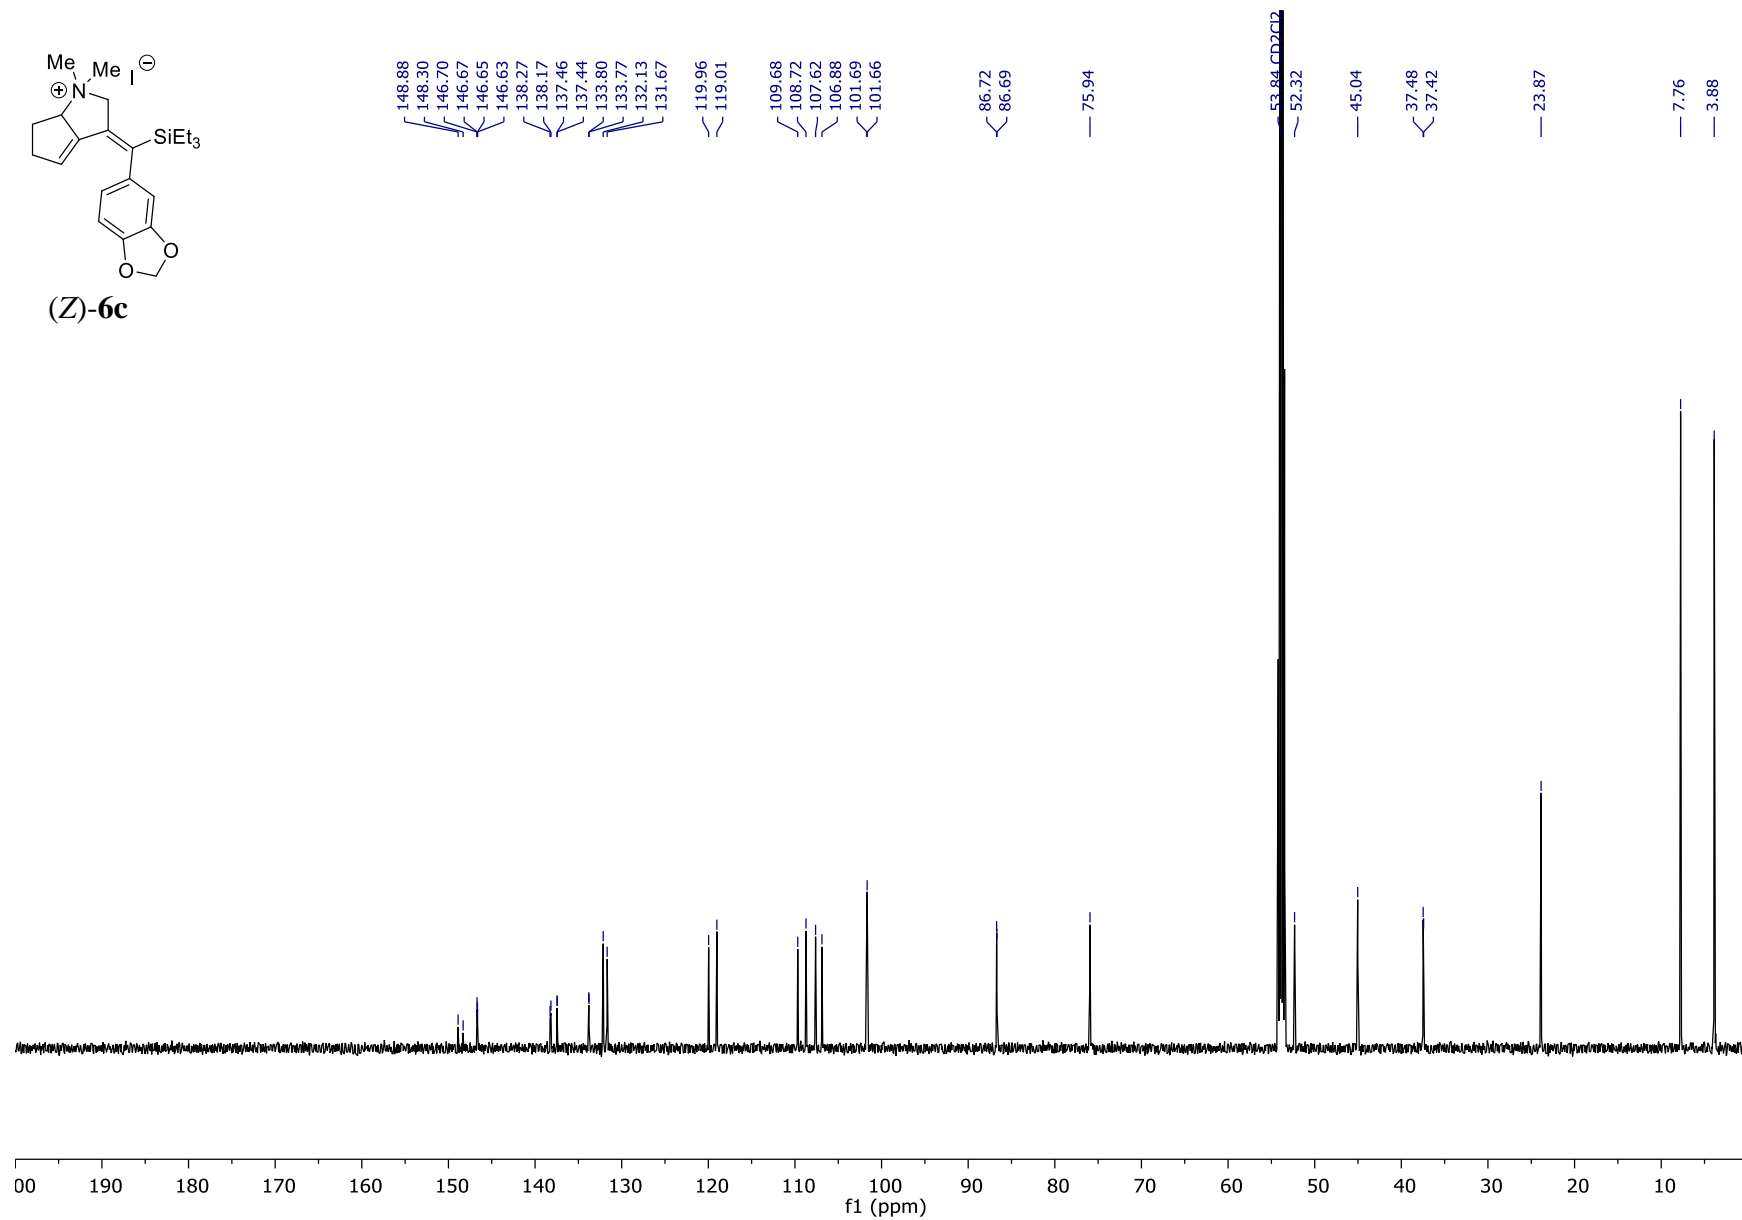

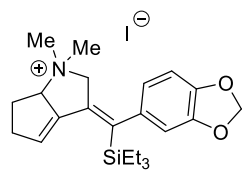**(E)-6c**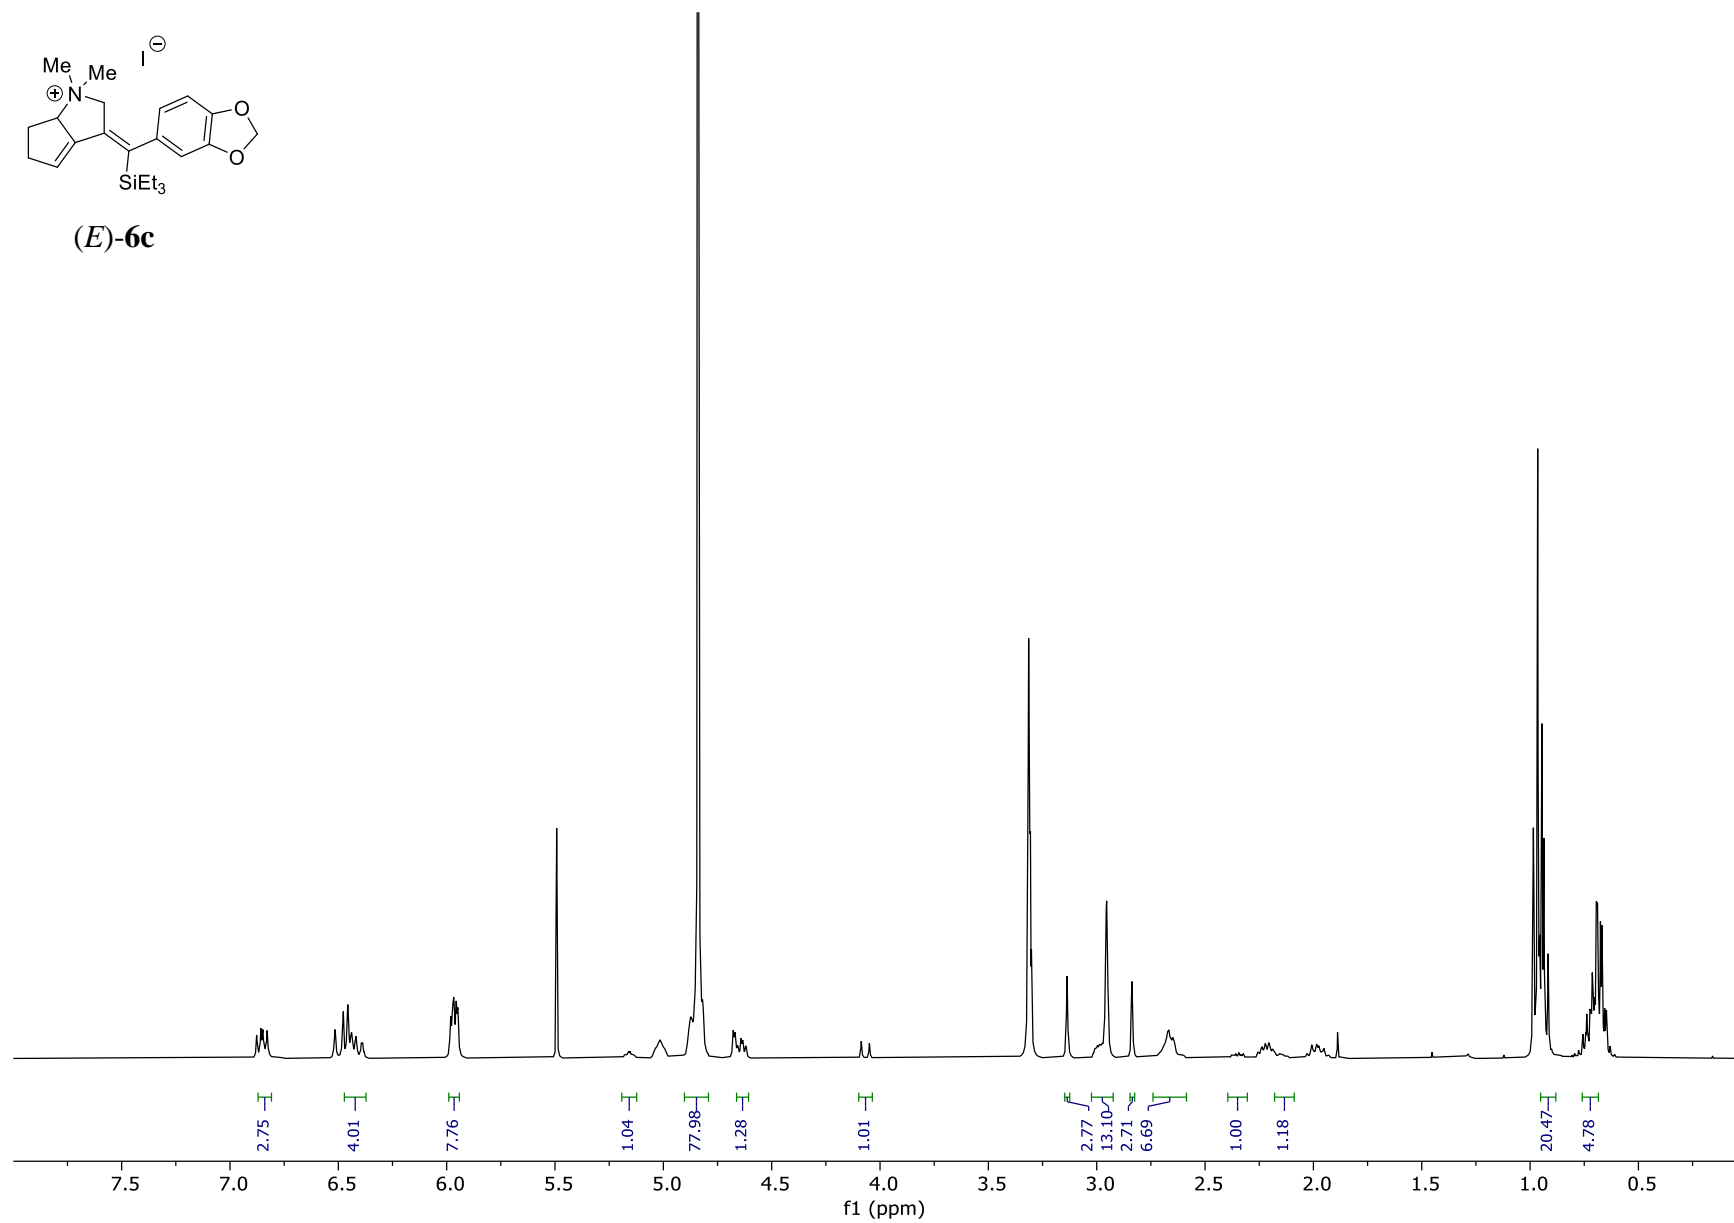

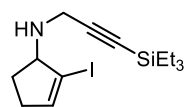**7**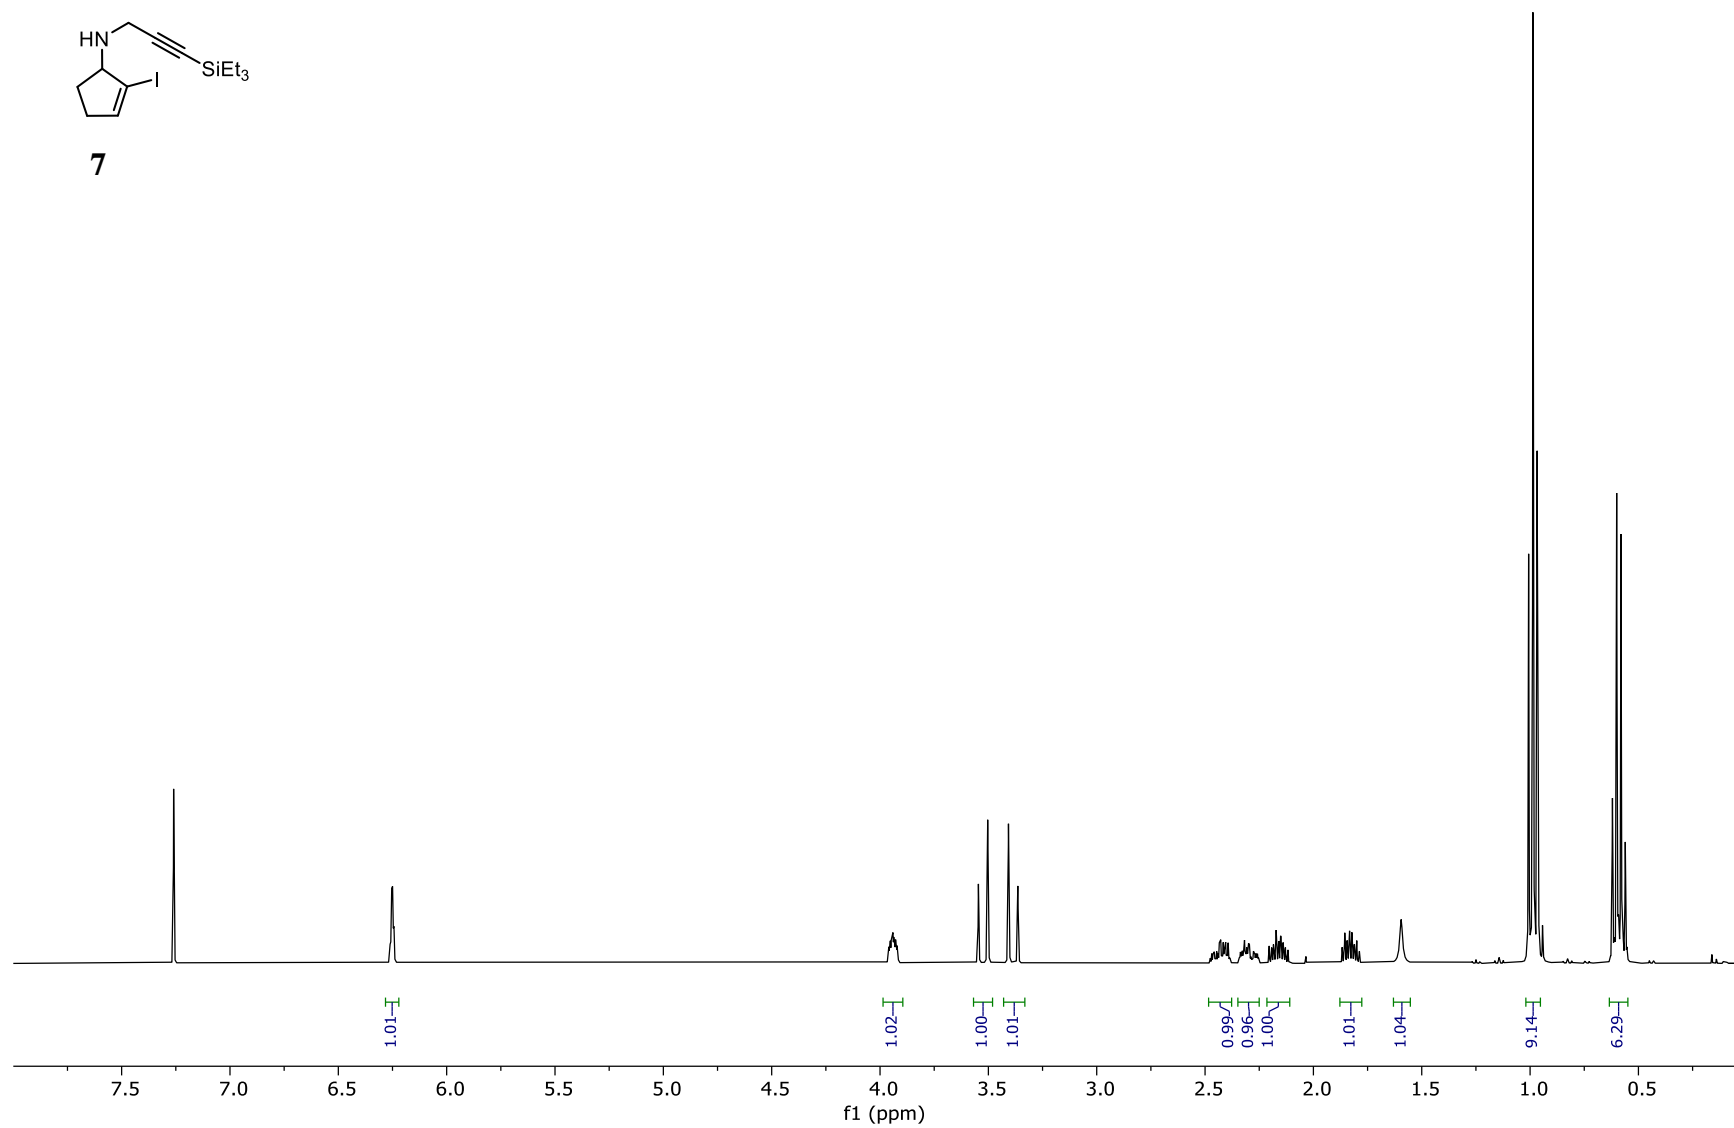

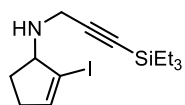**7**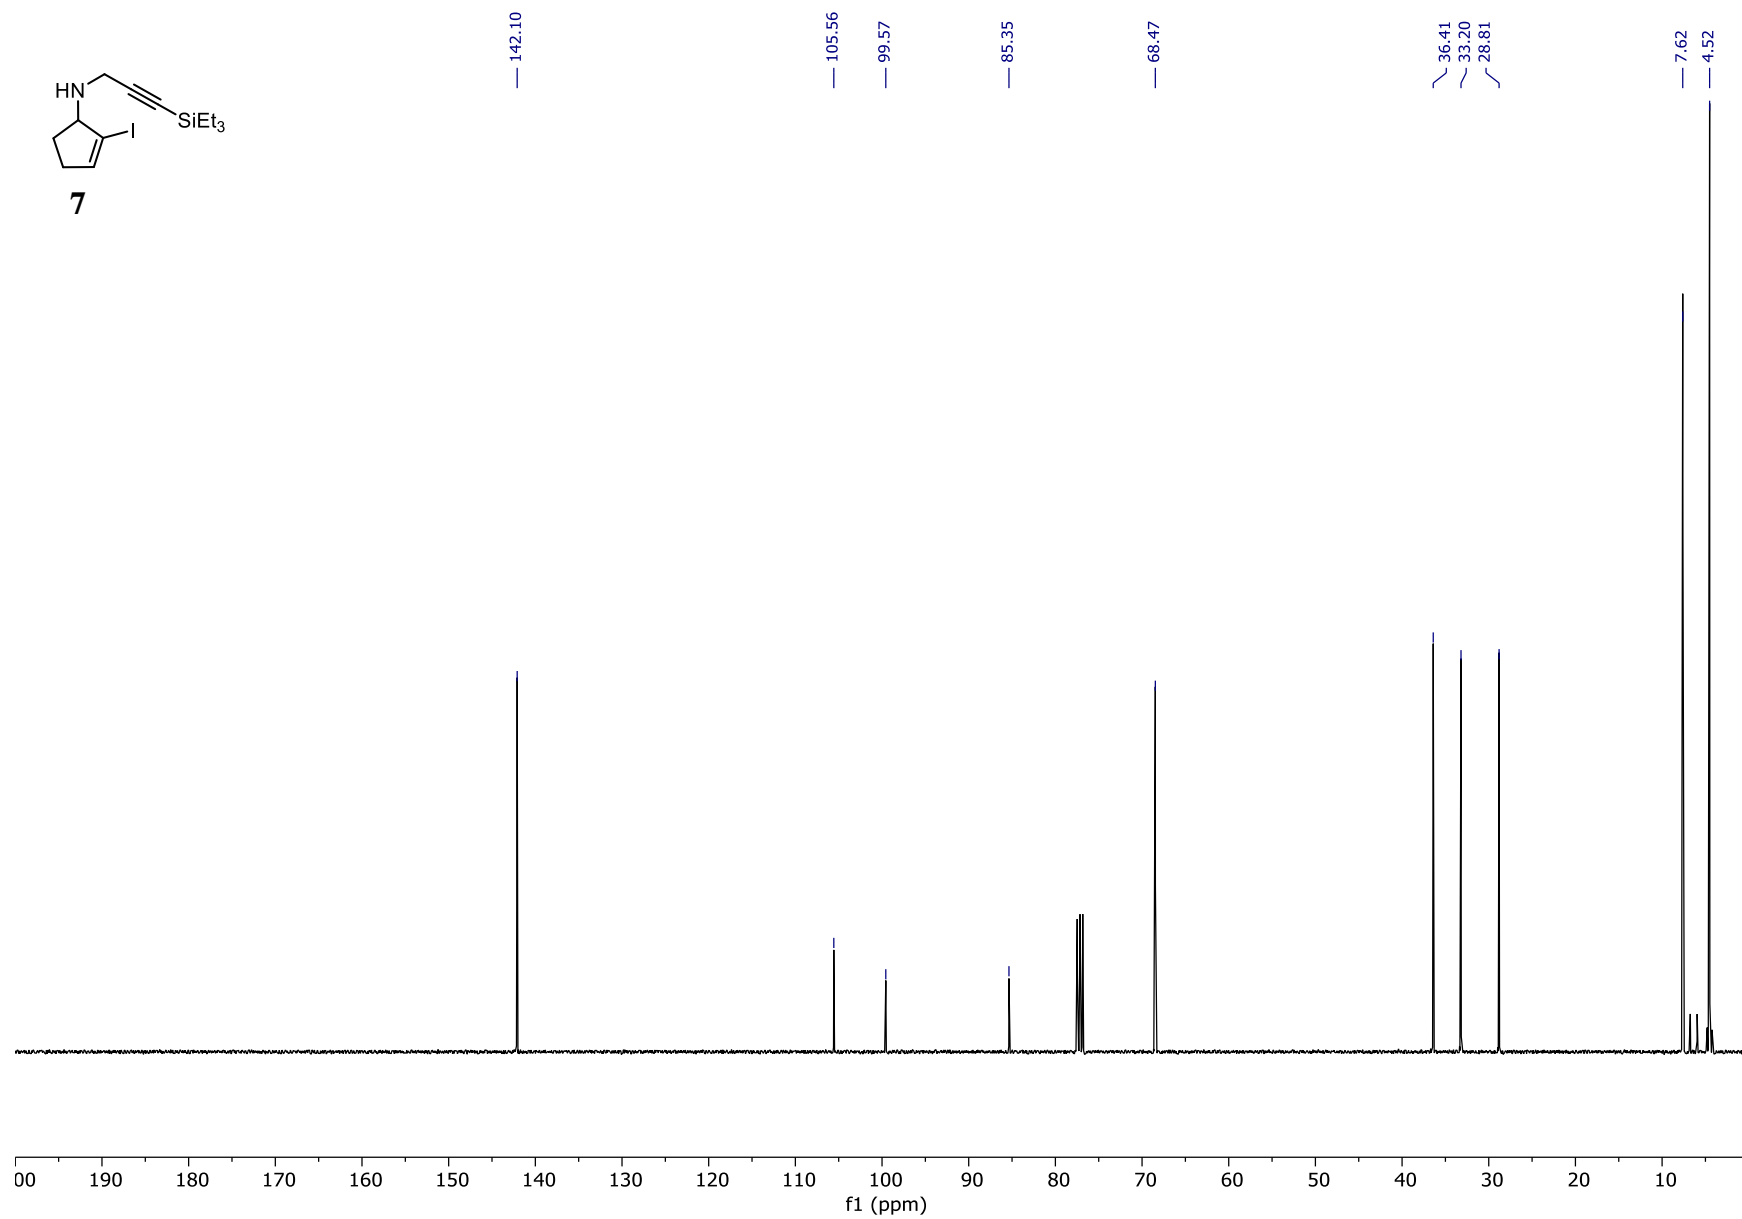

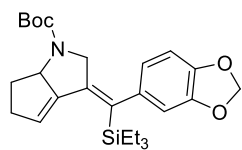**(E)-9a**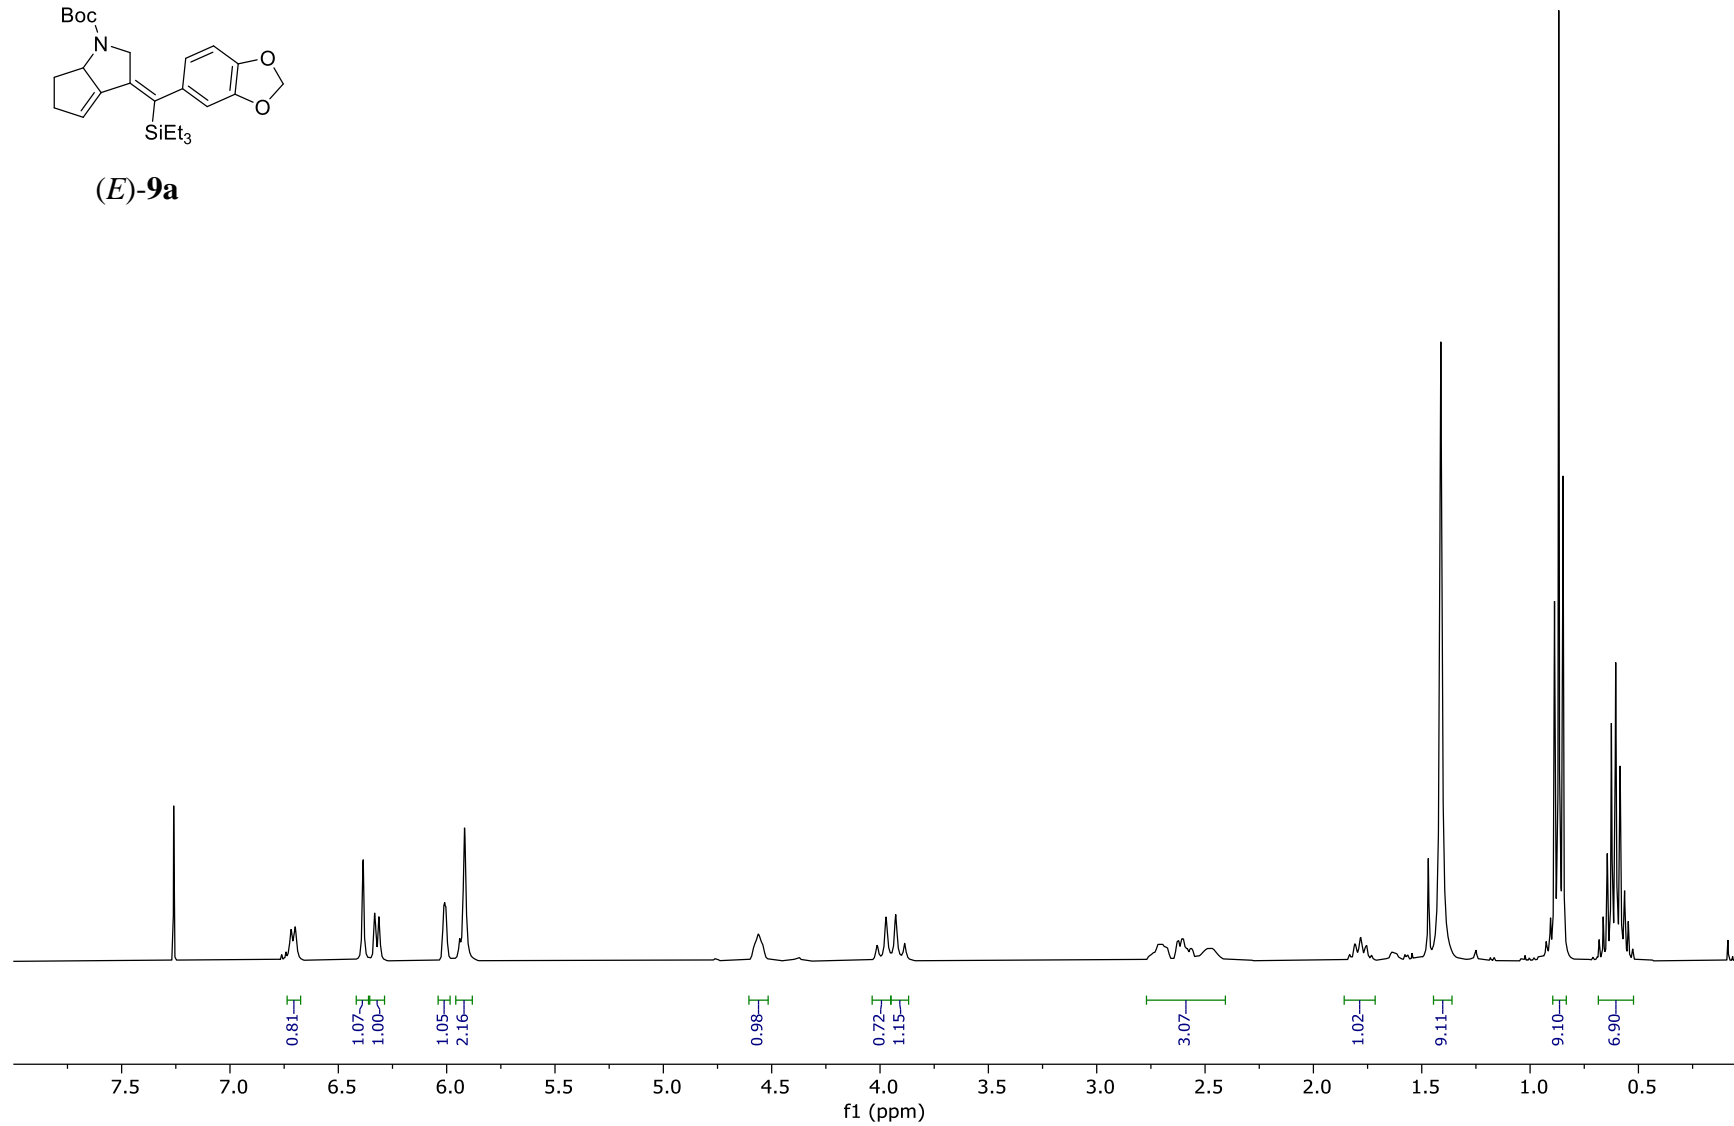



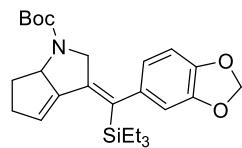**(E)-9a**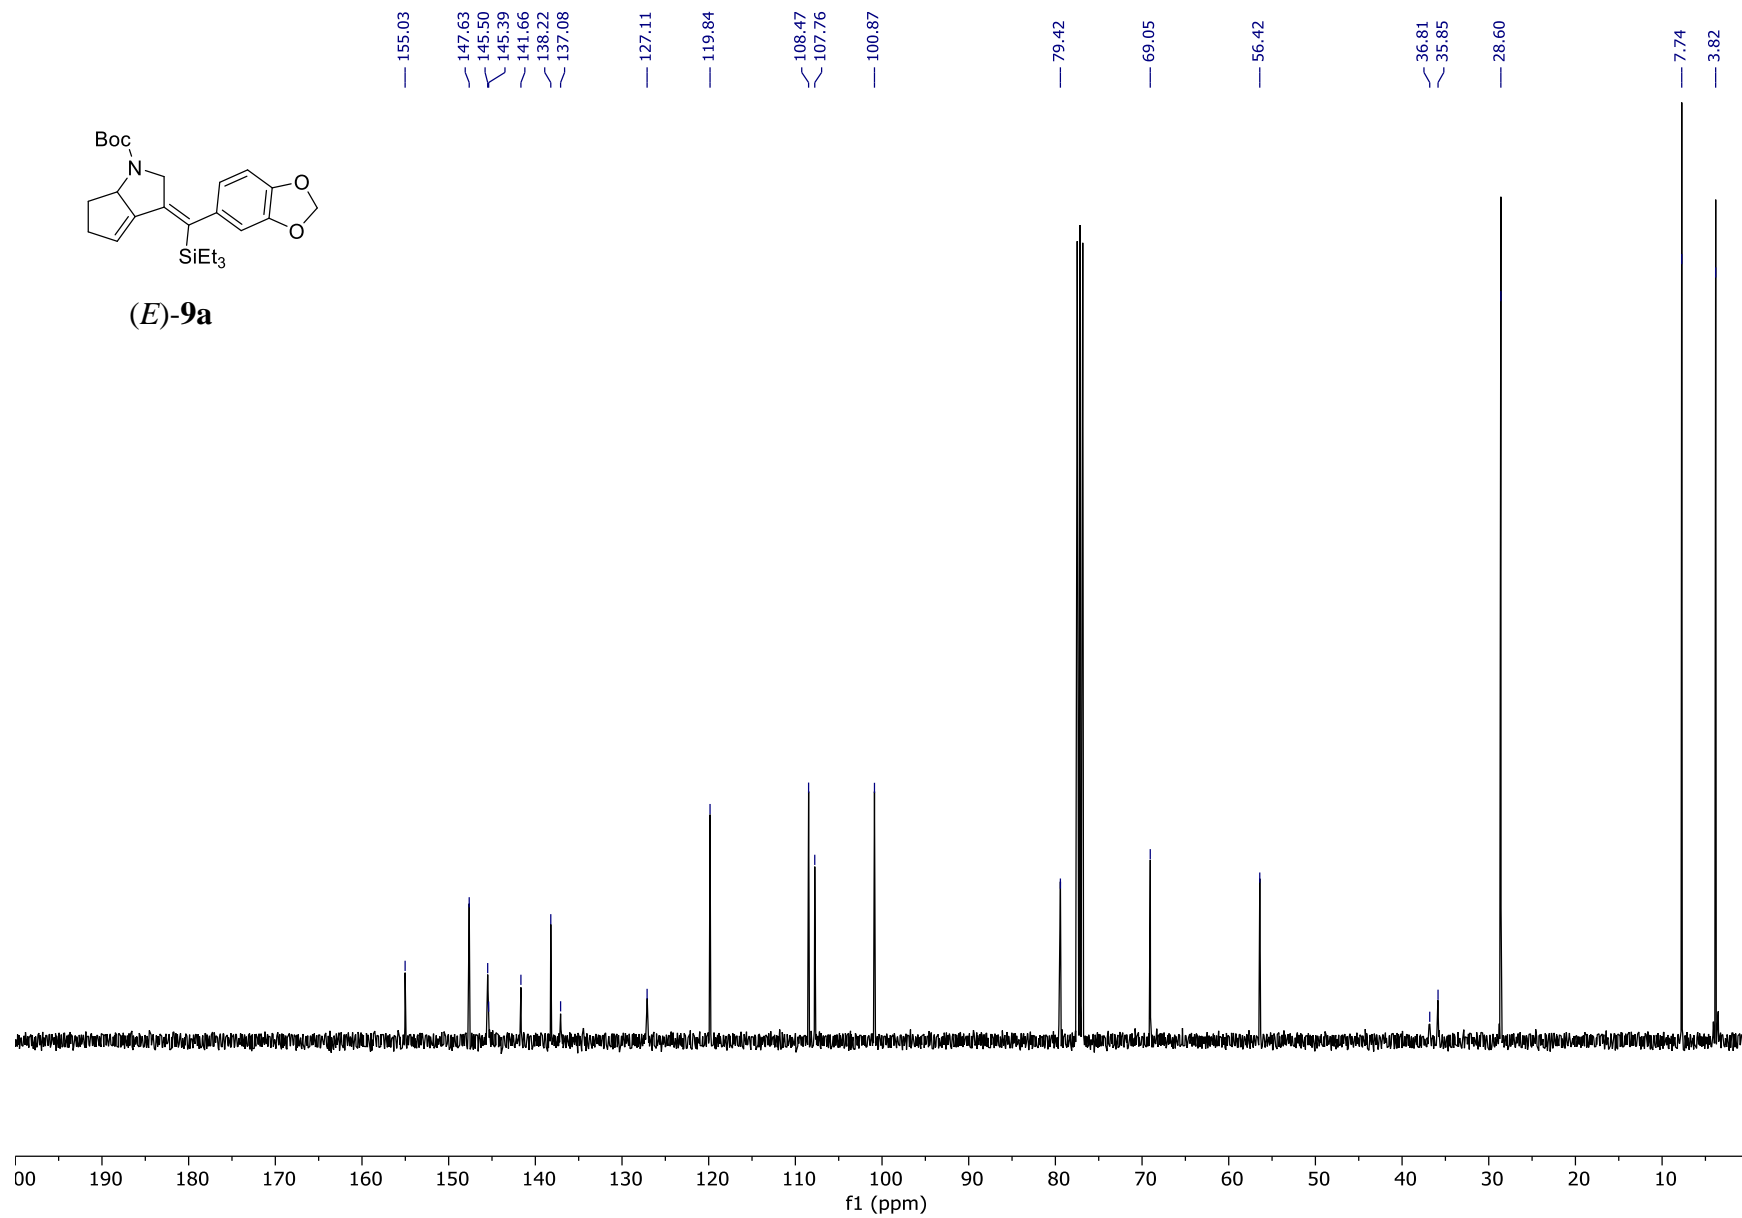

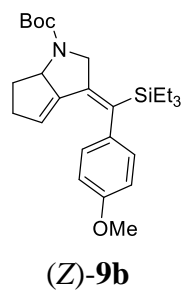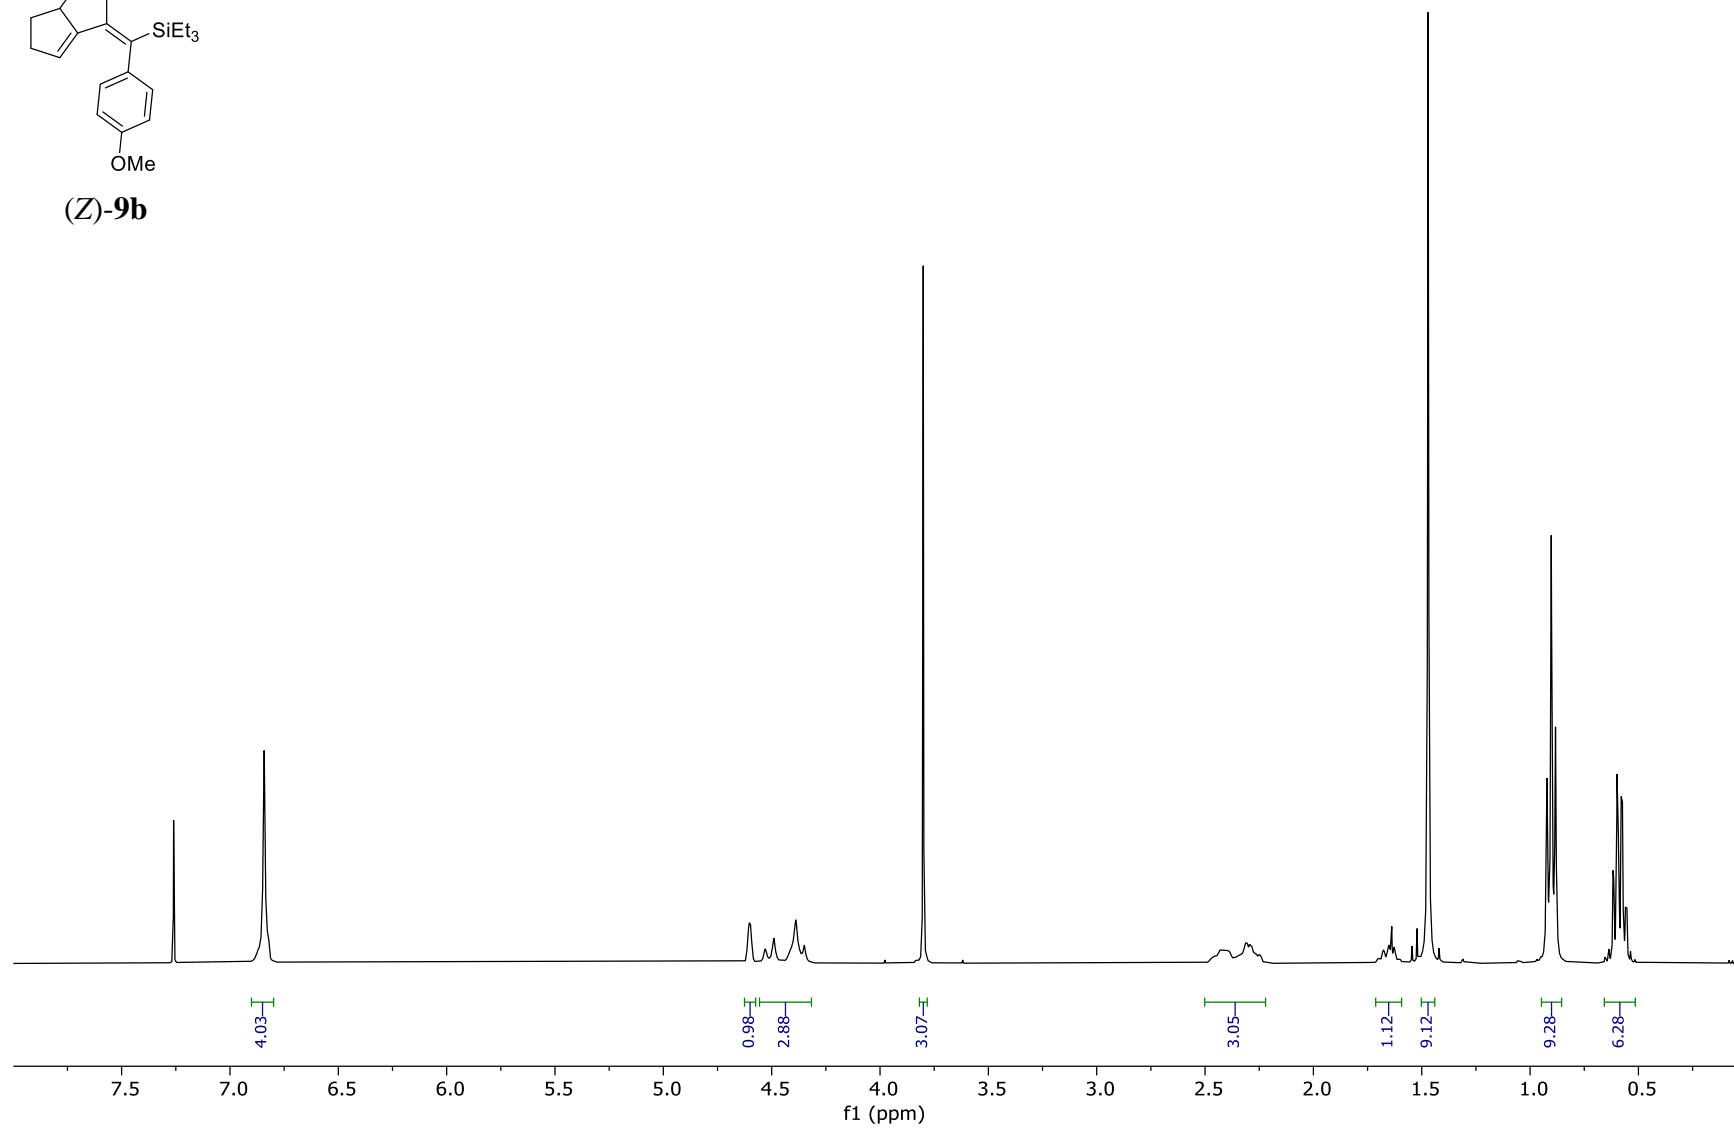

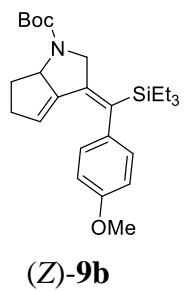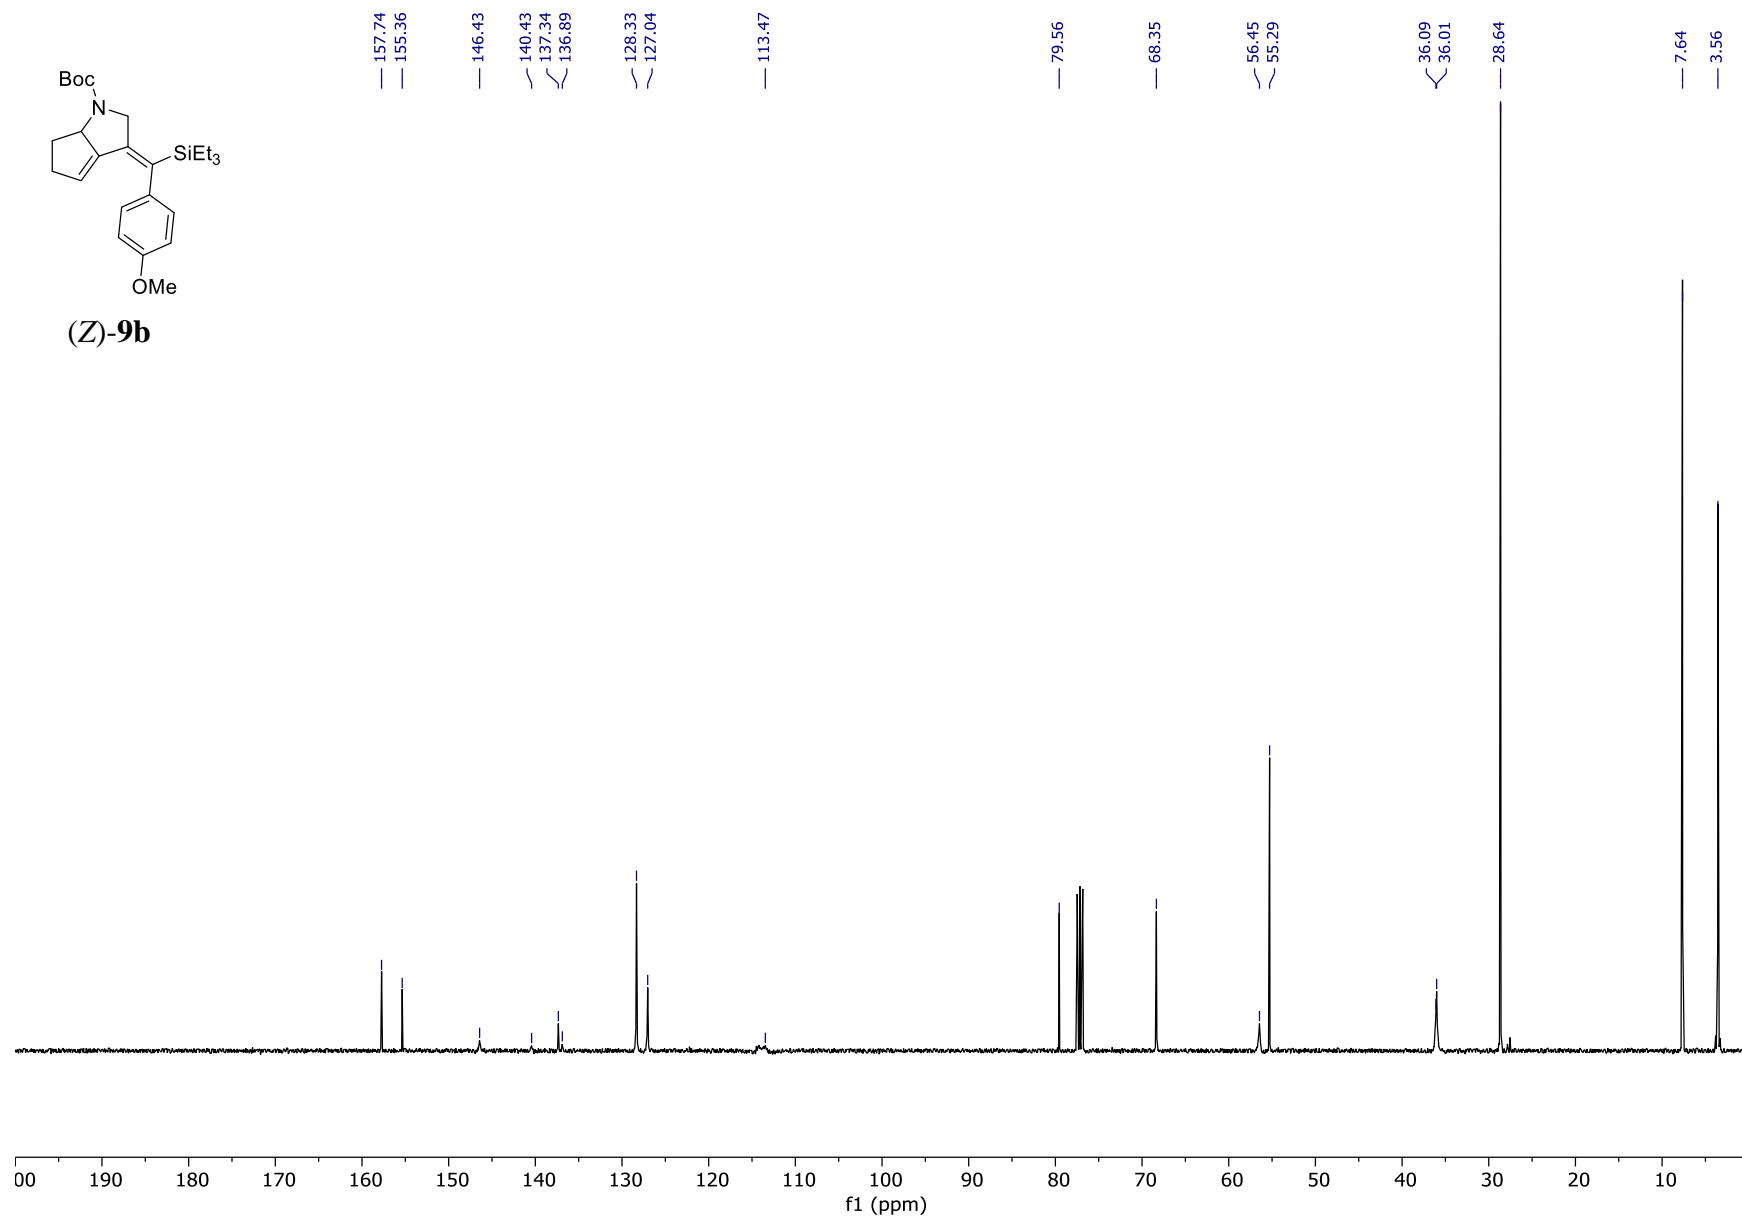

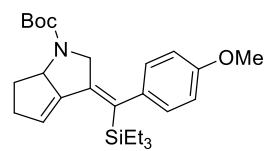**(E)-9b**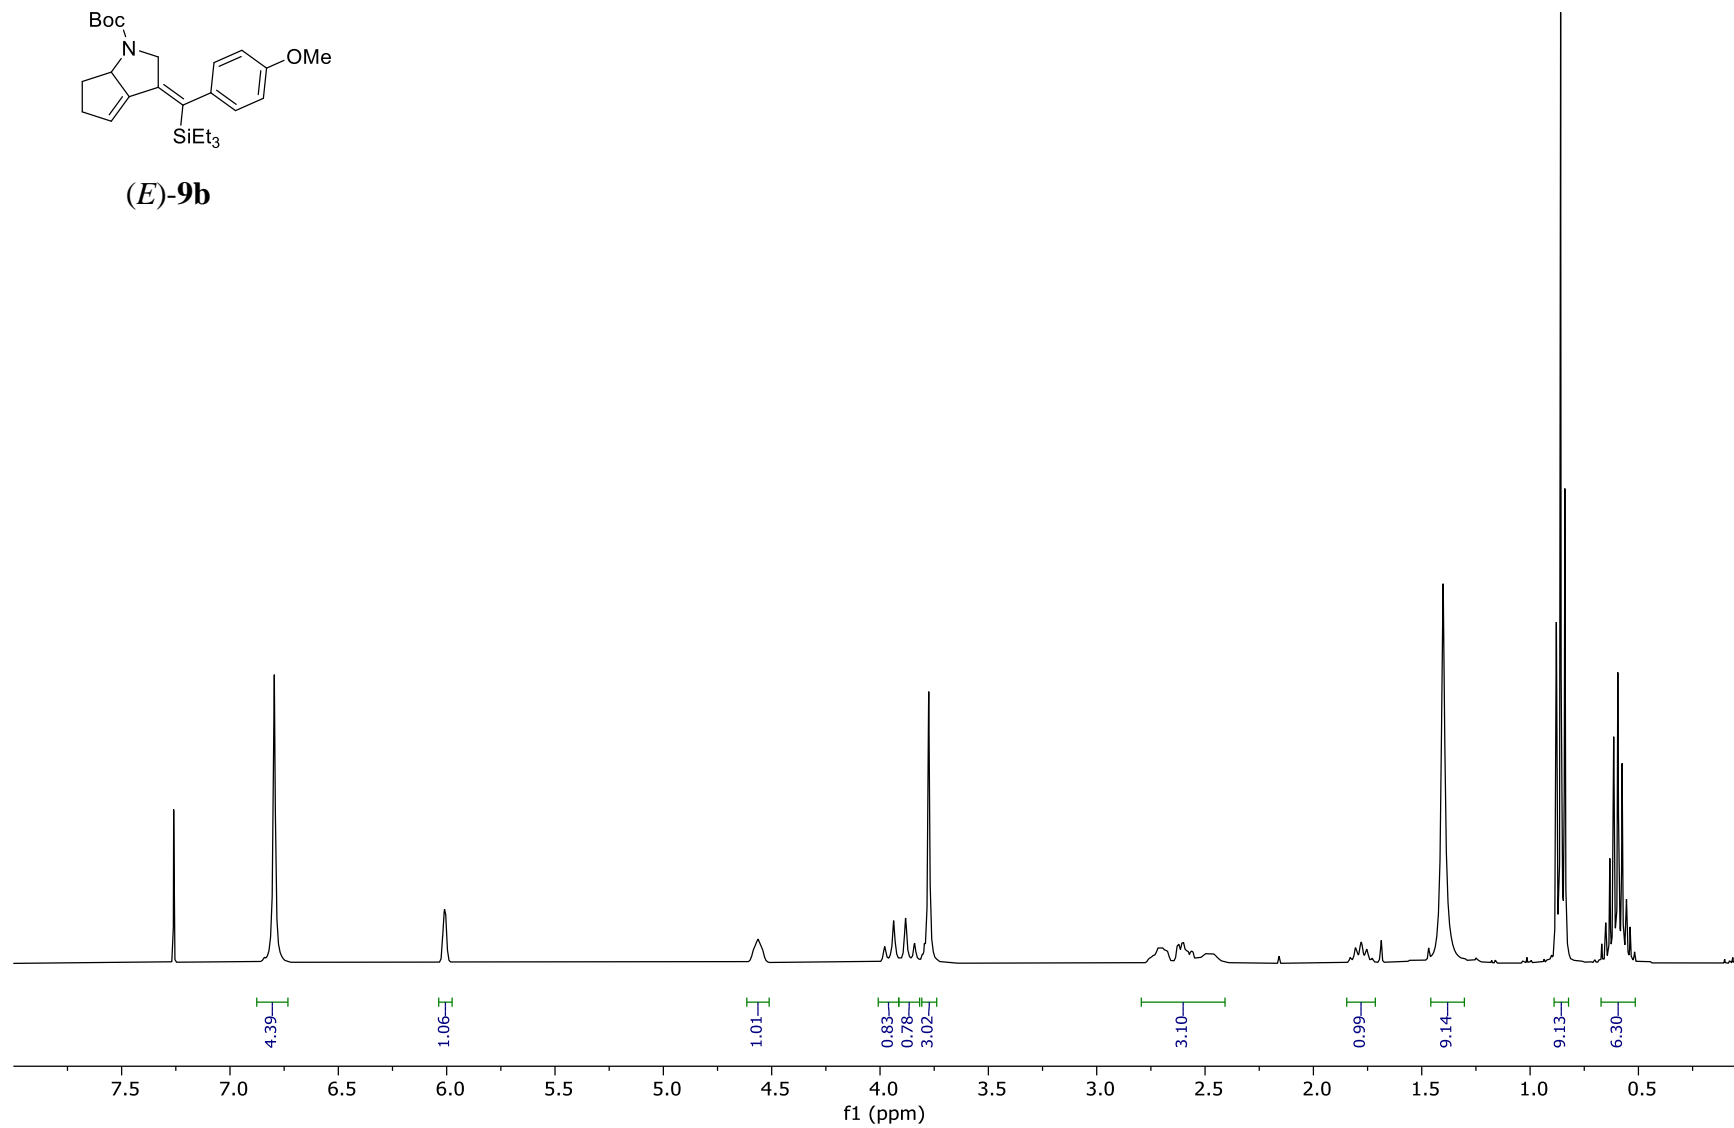

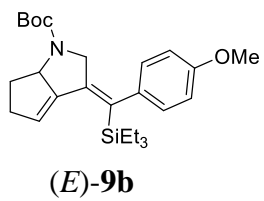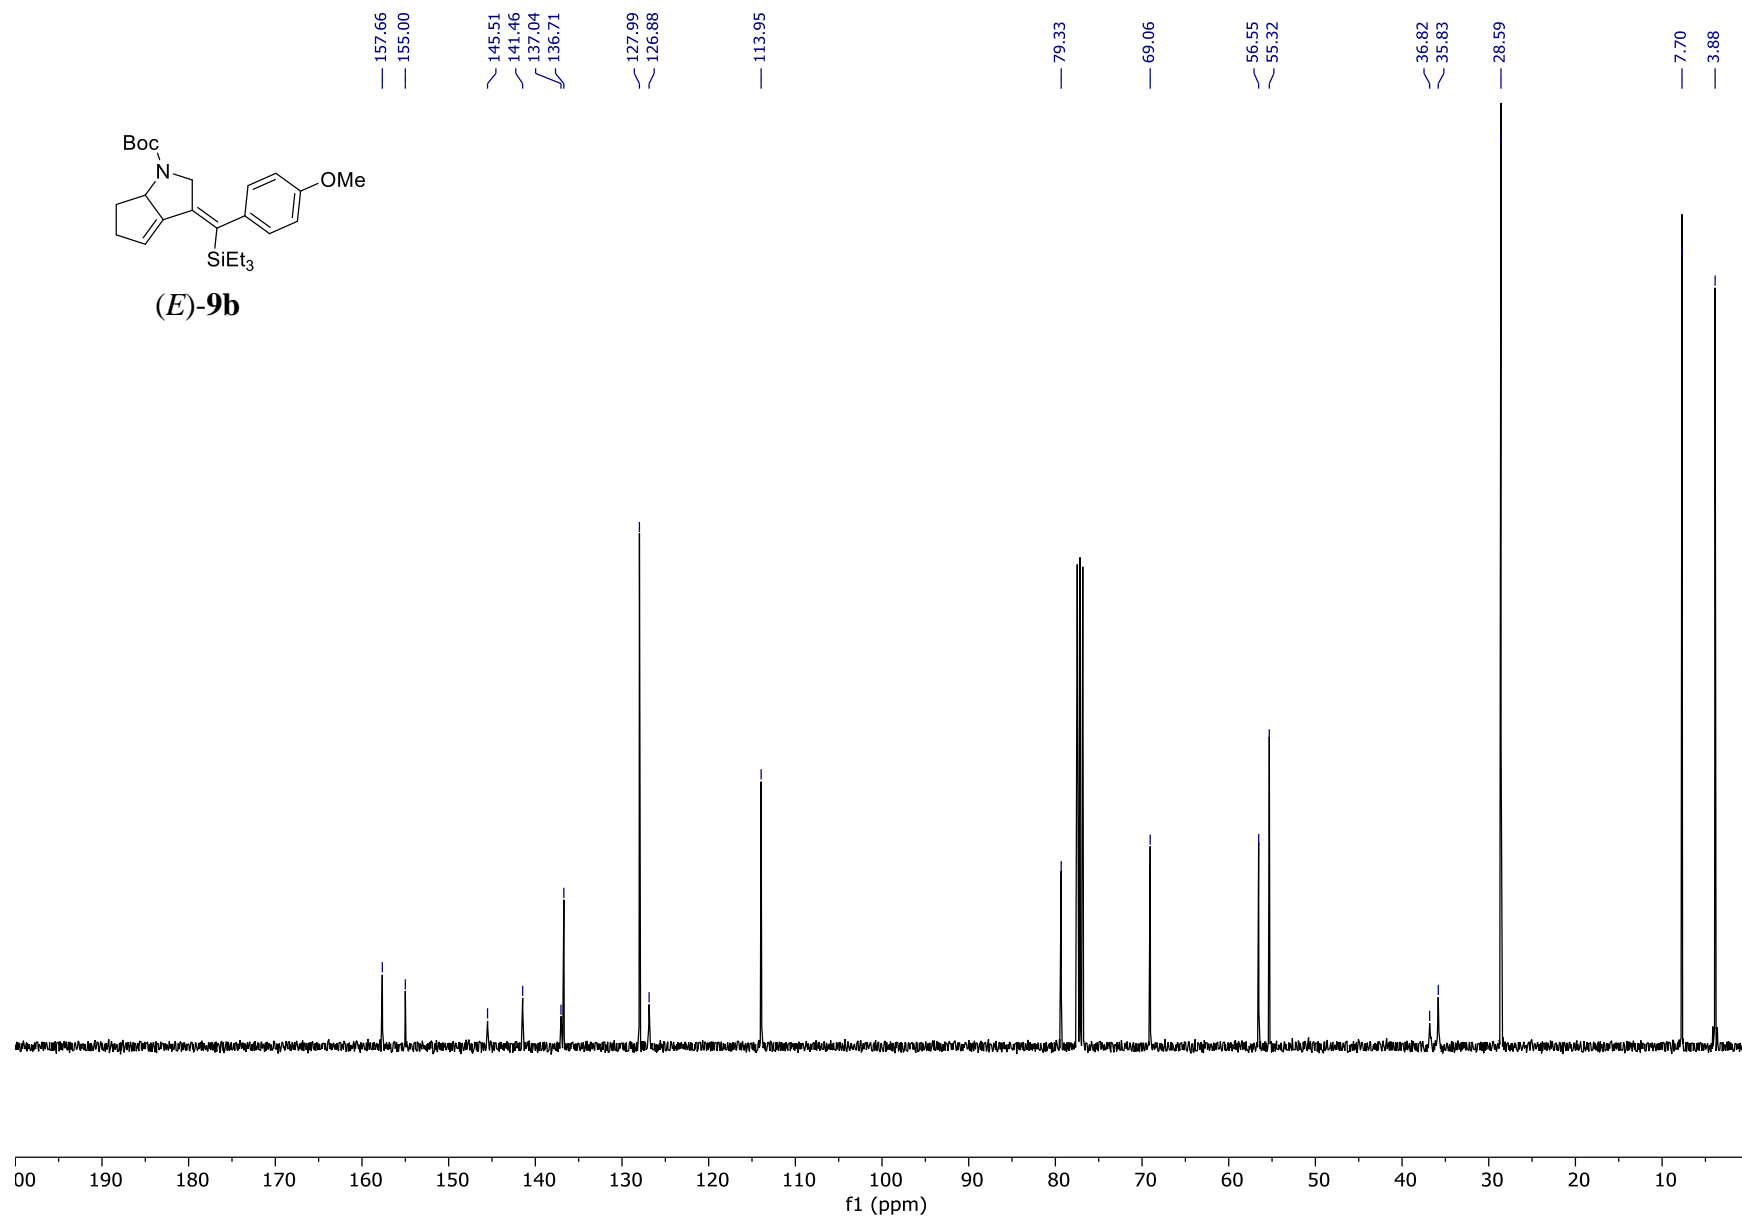

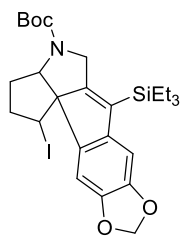**10a**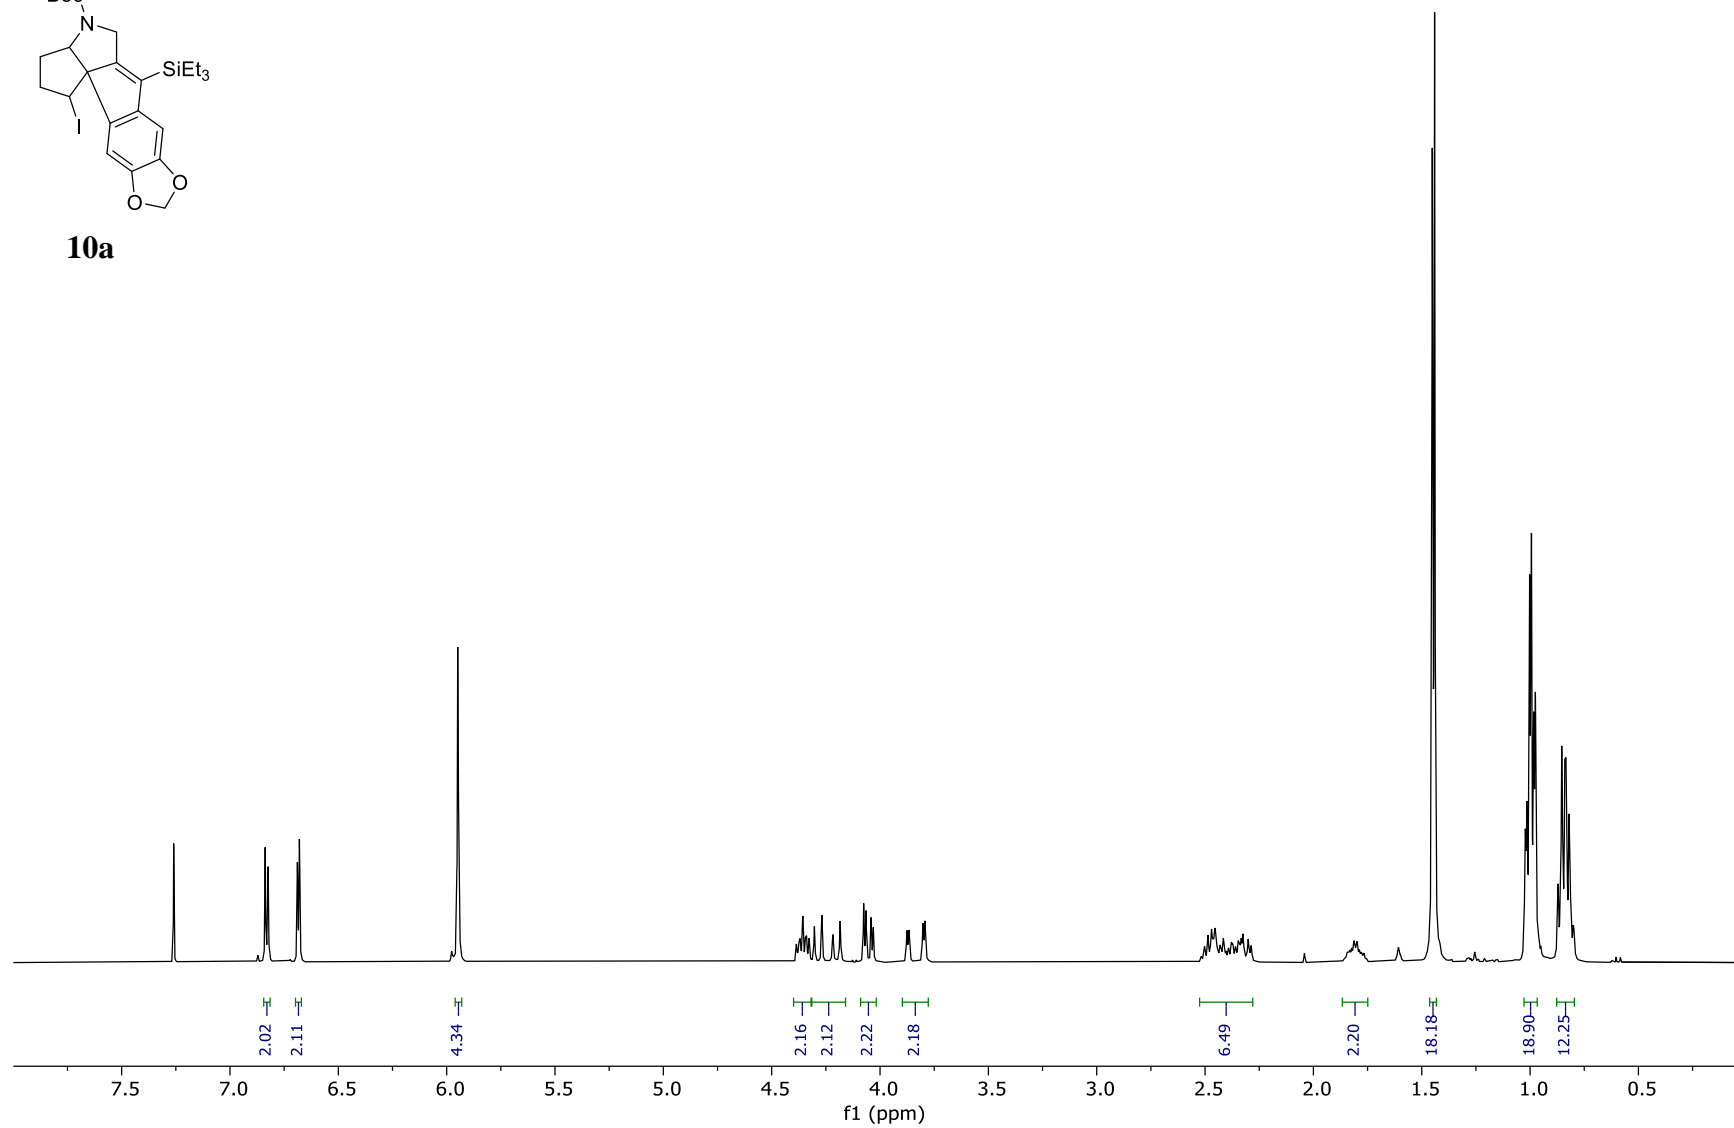

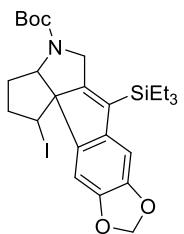**10a**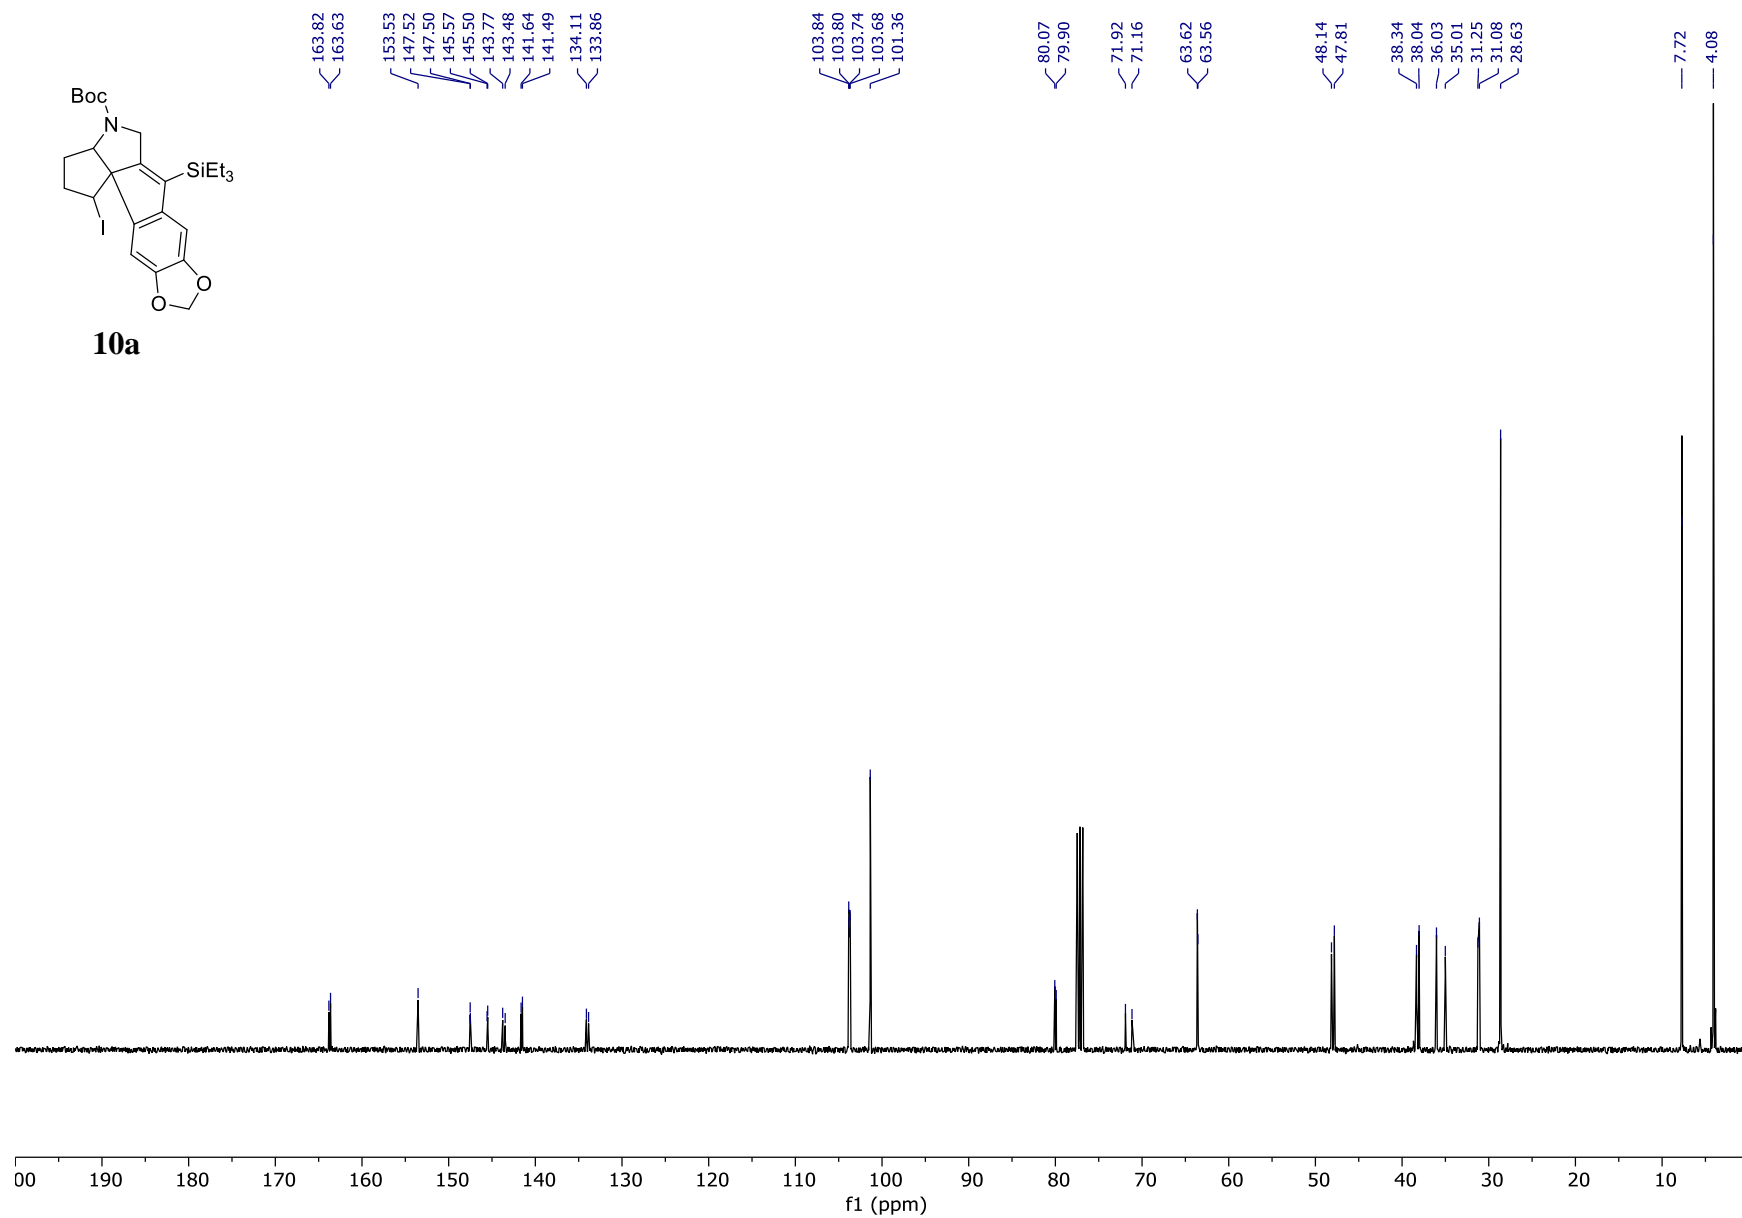

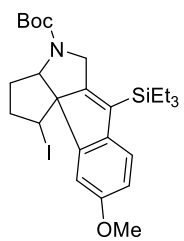**10b**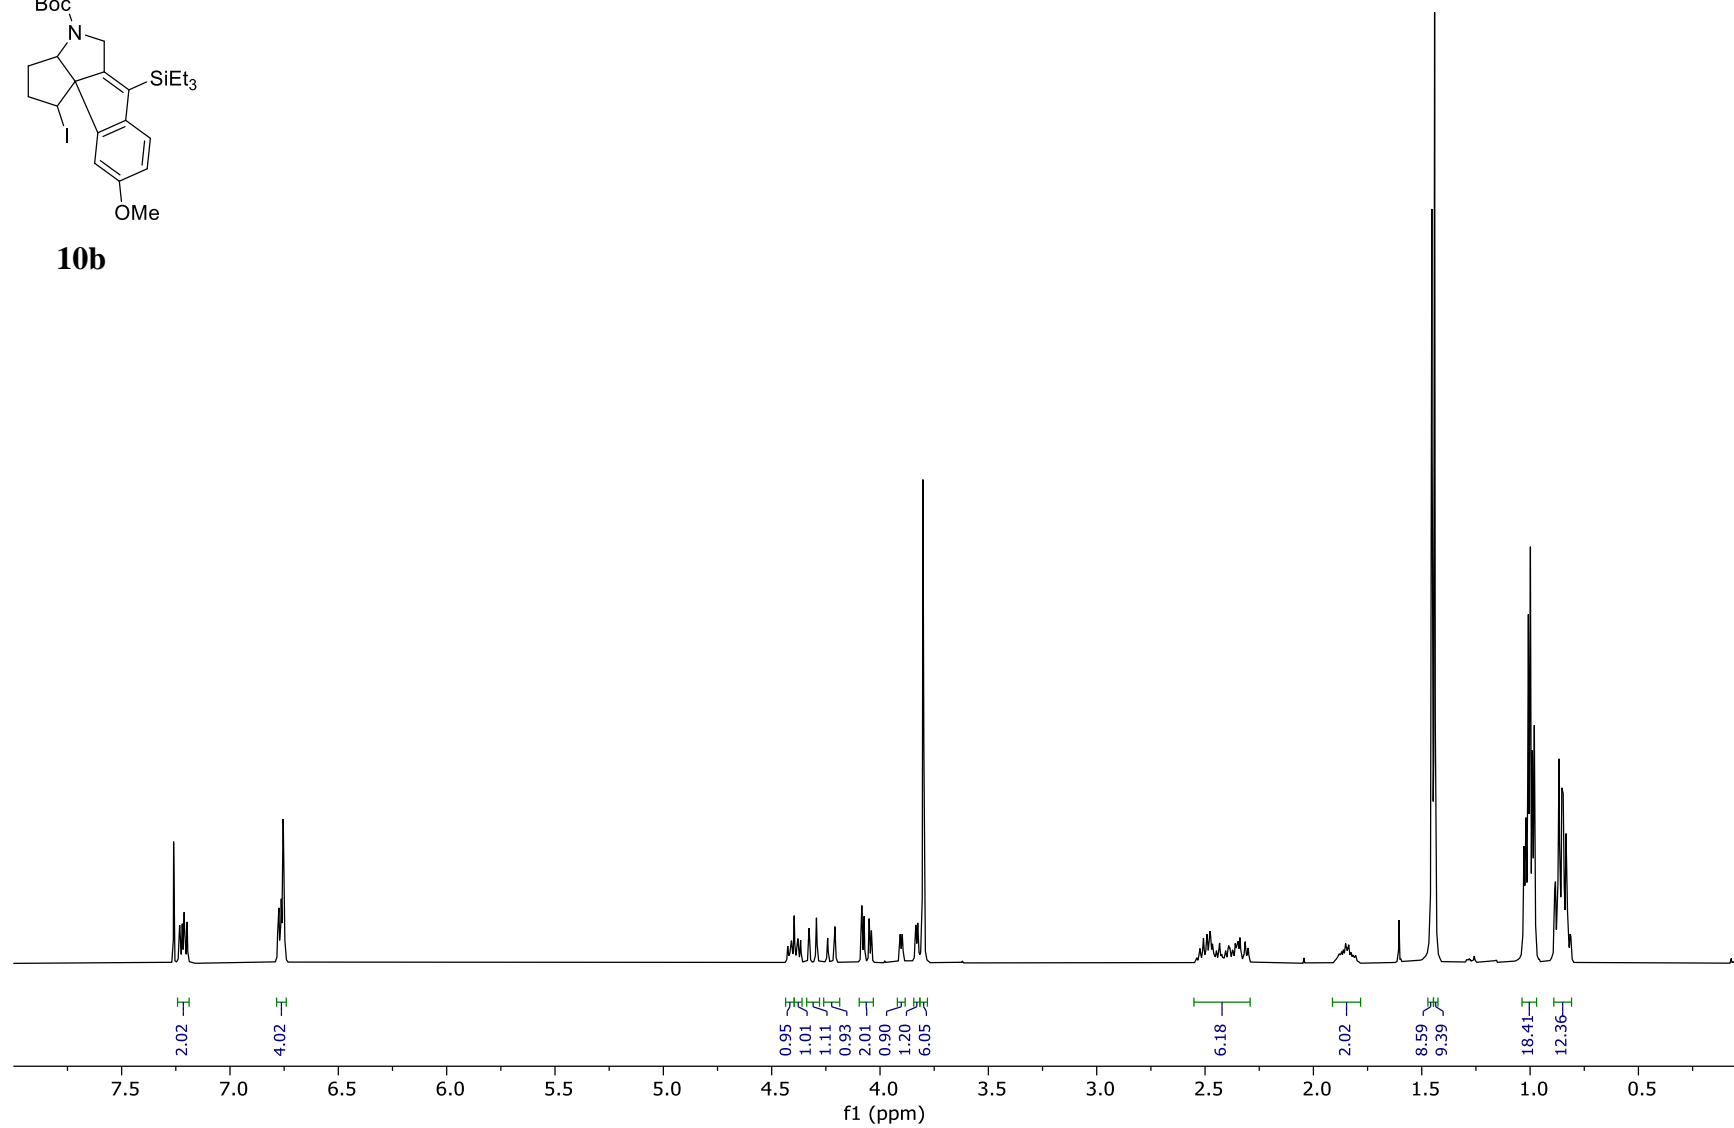



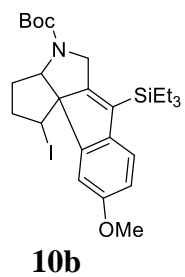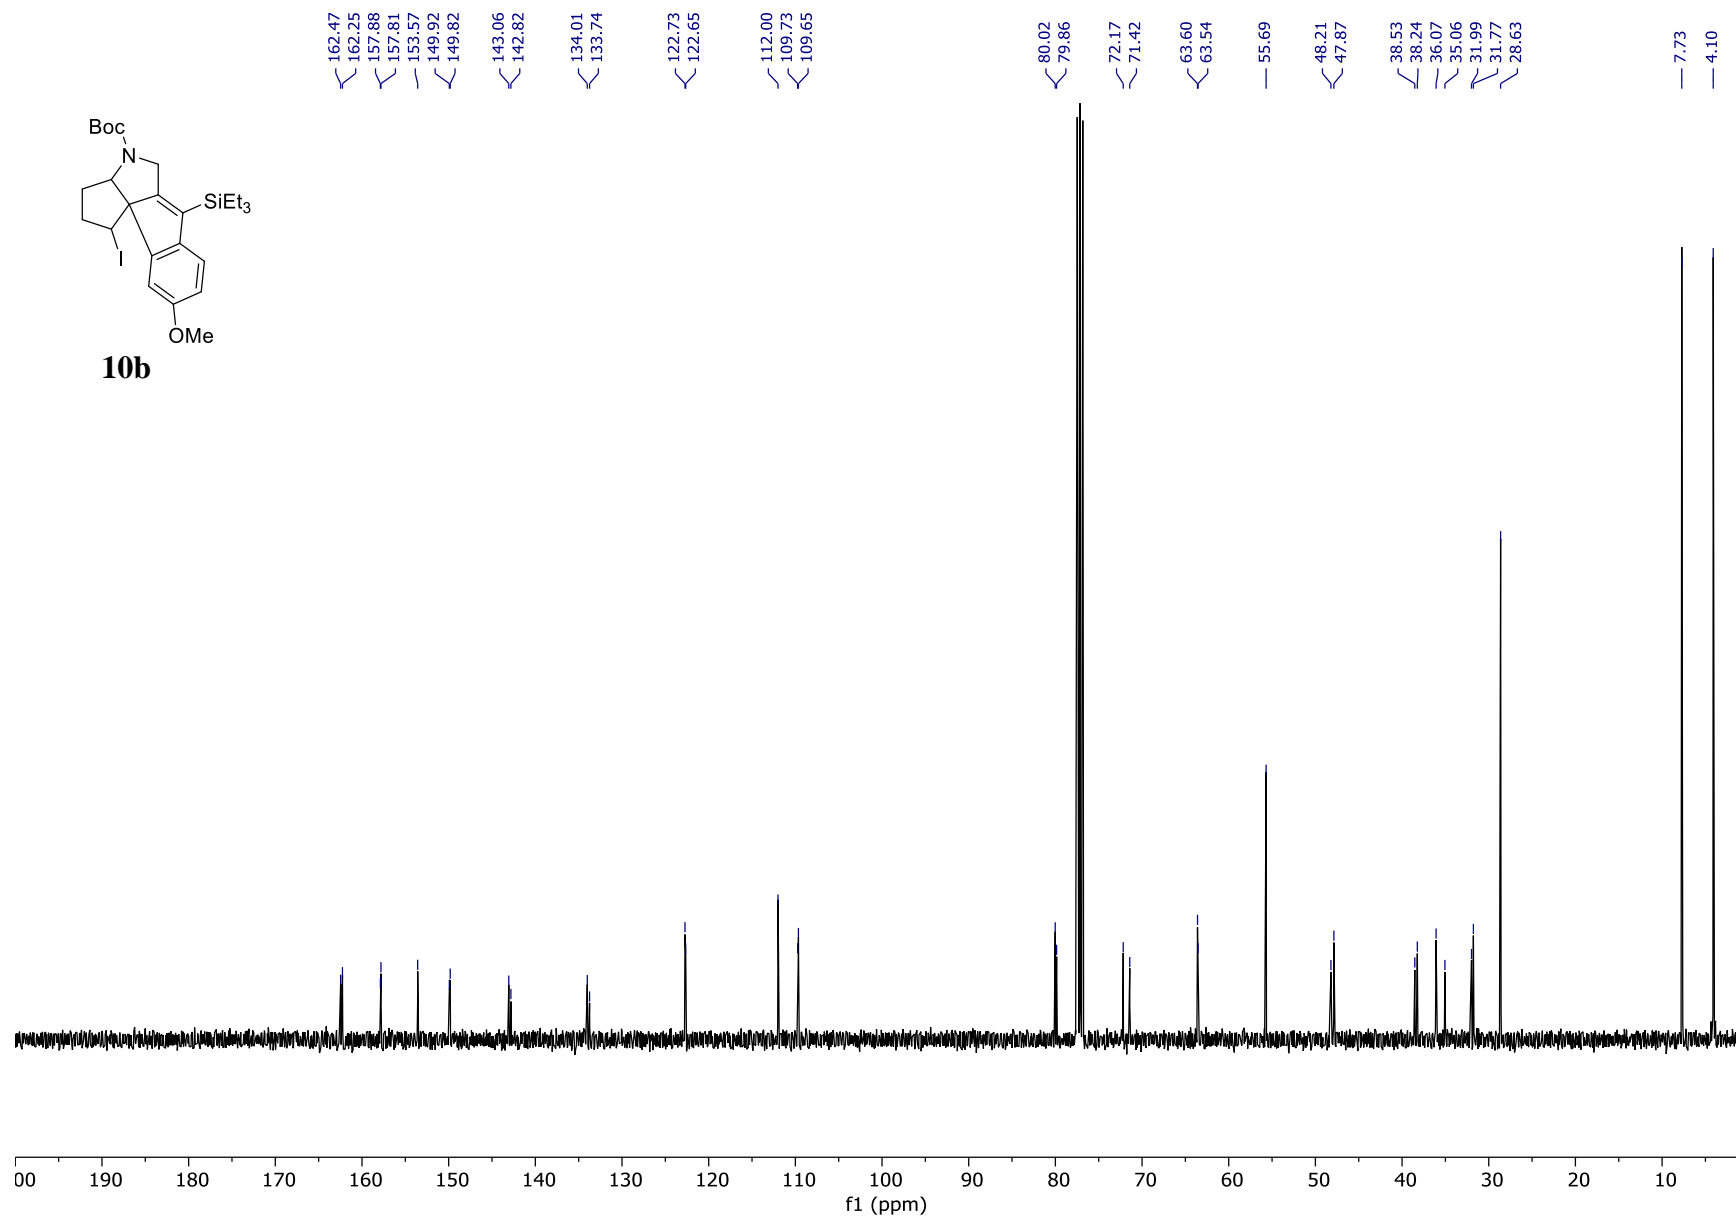

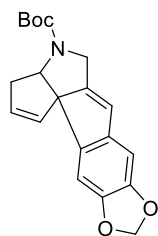**11a**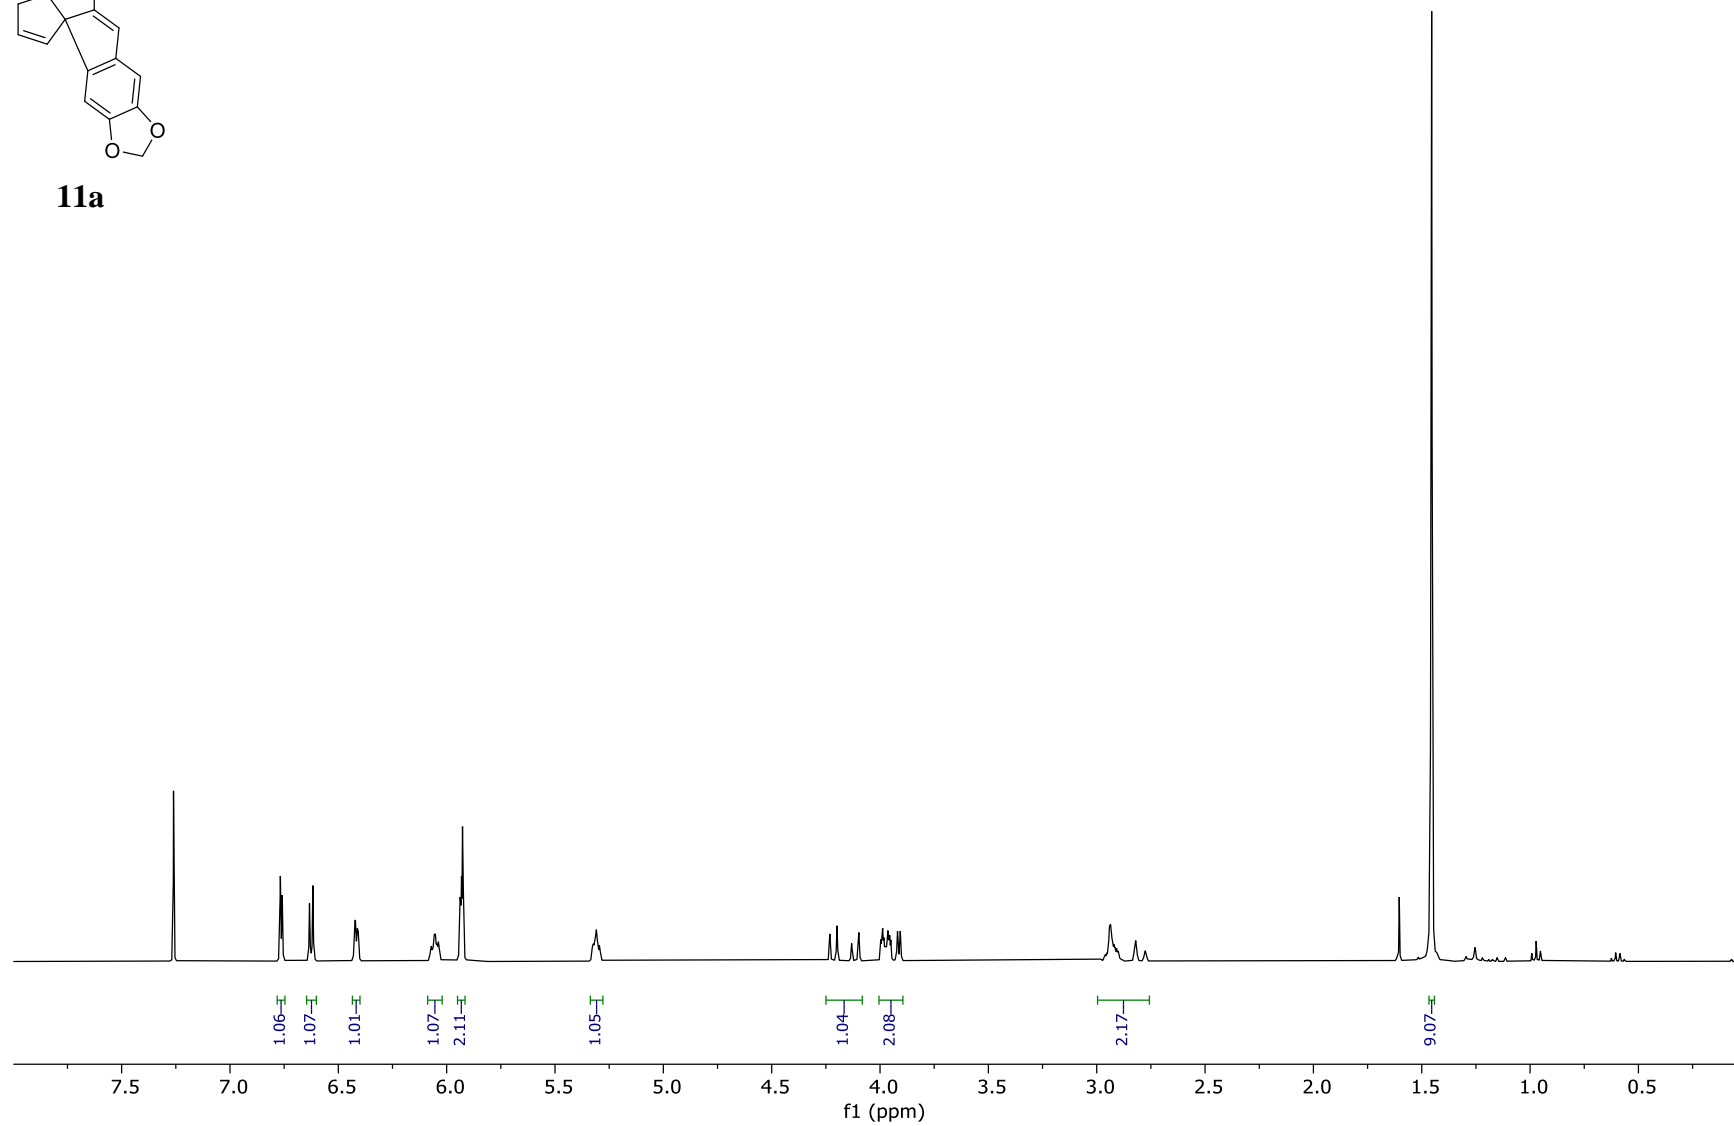

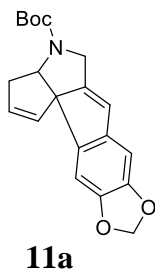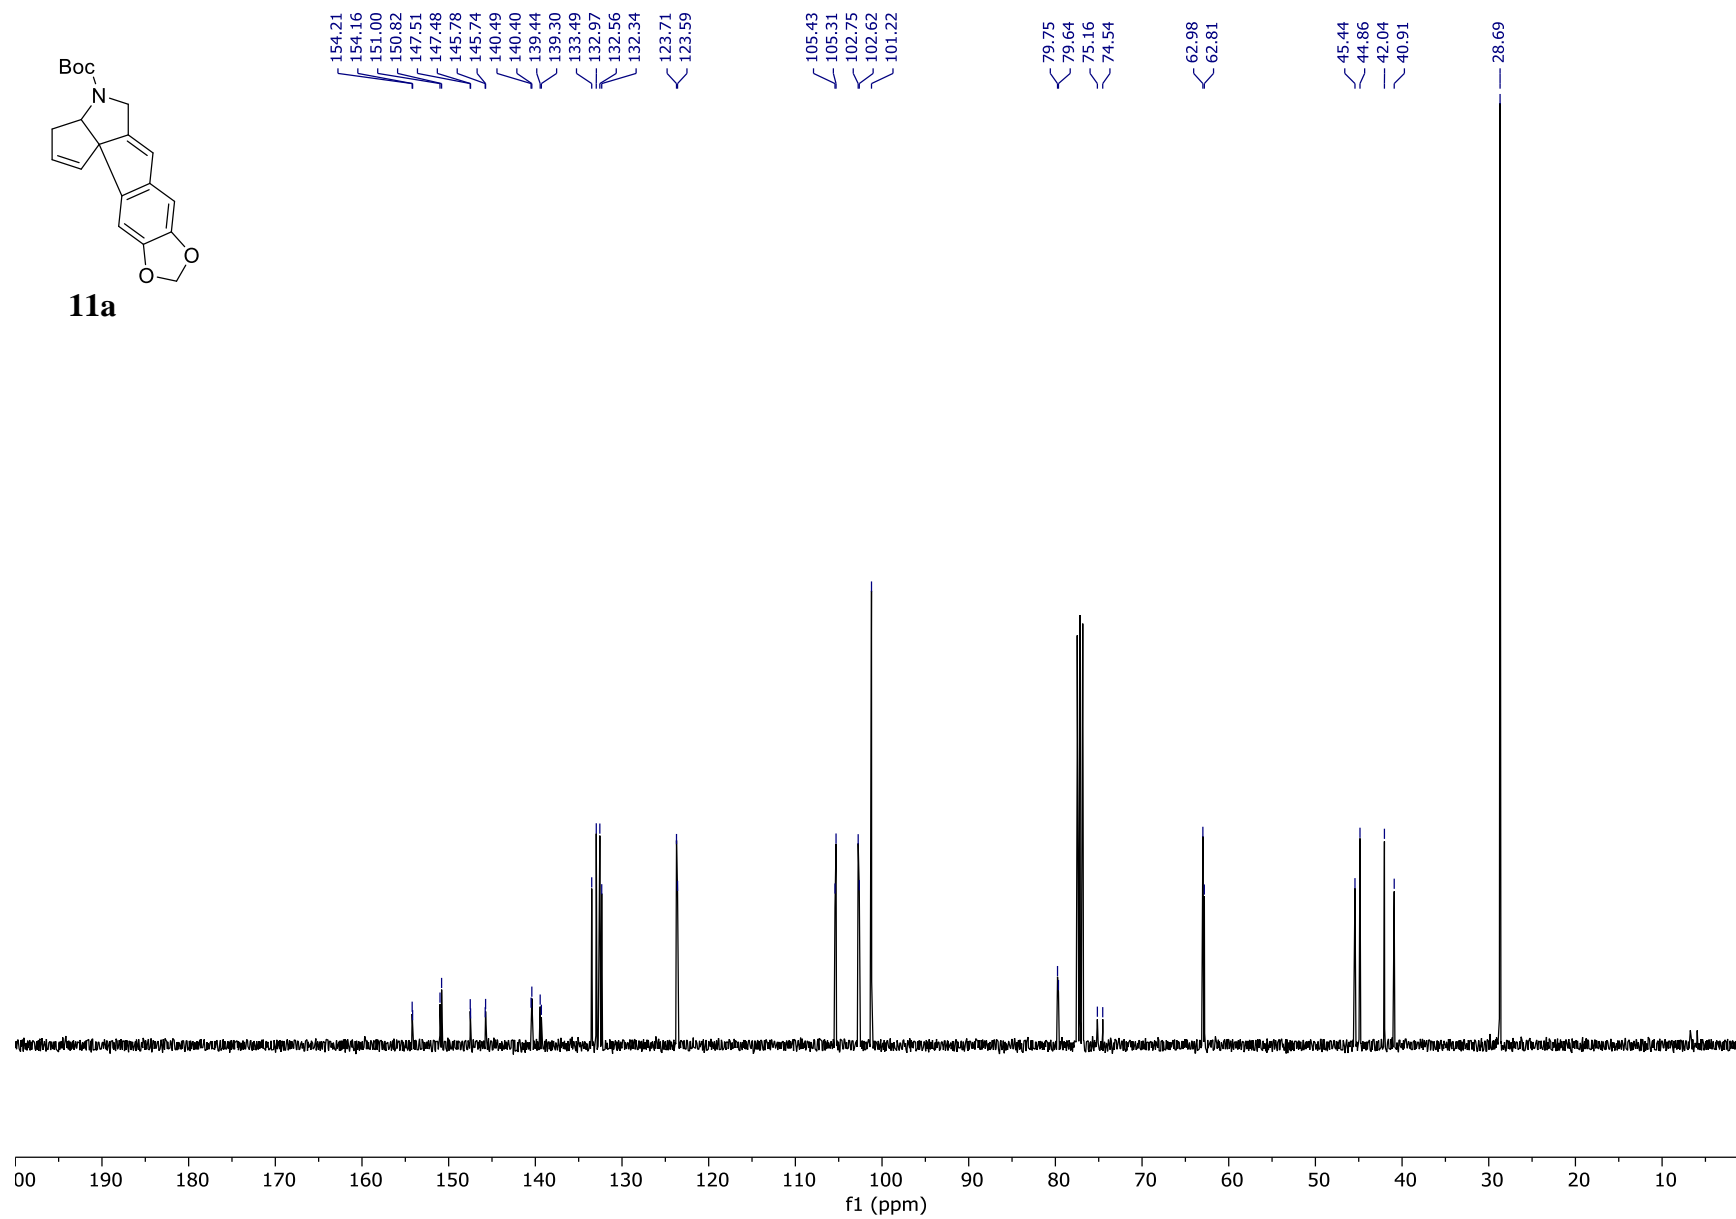

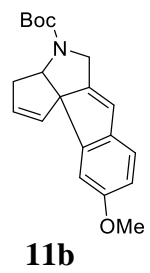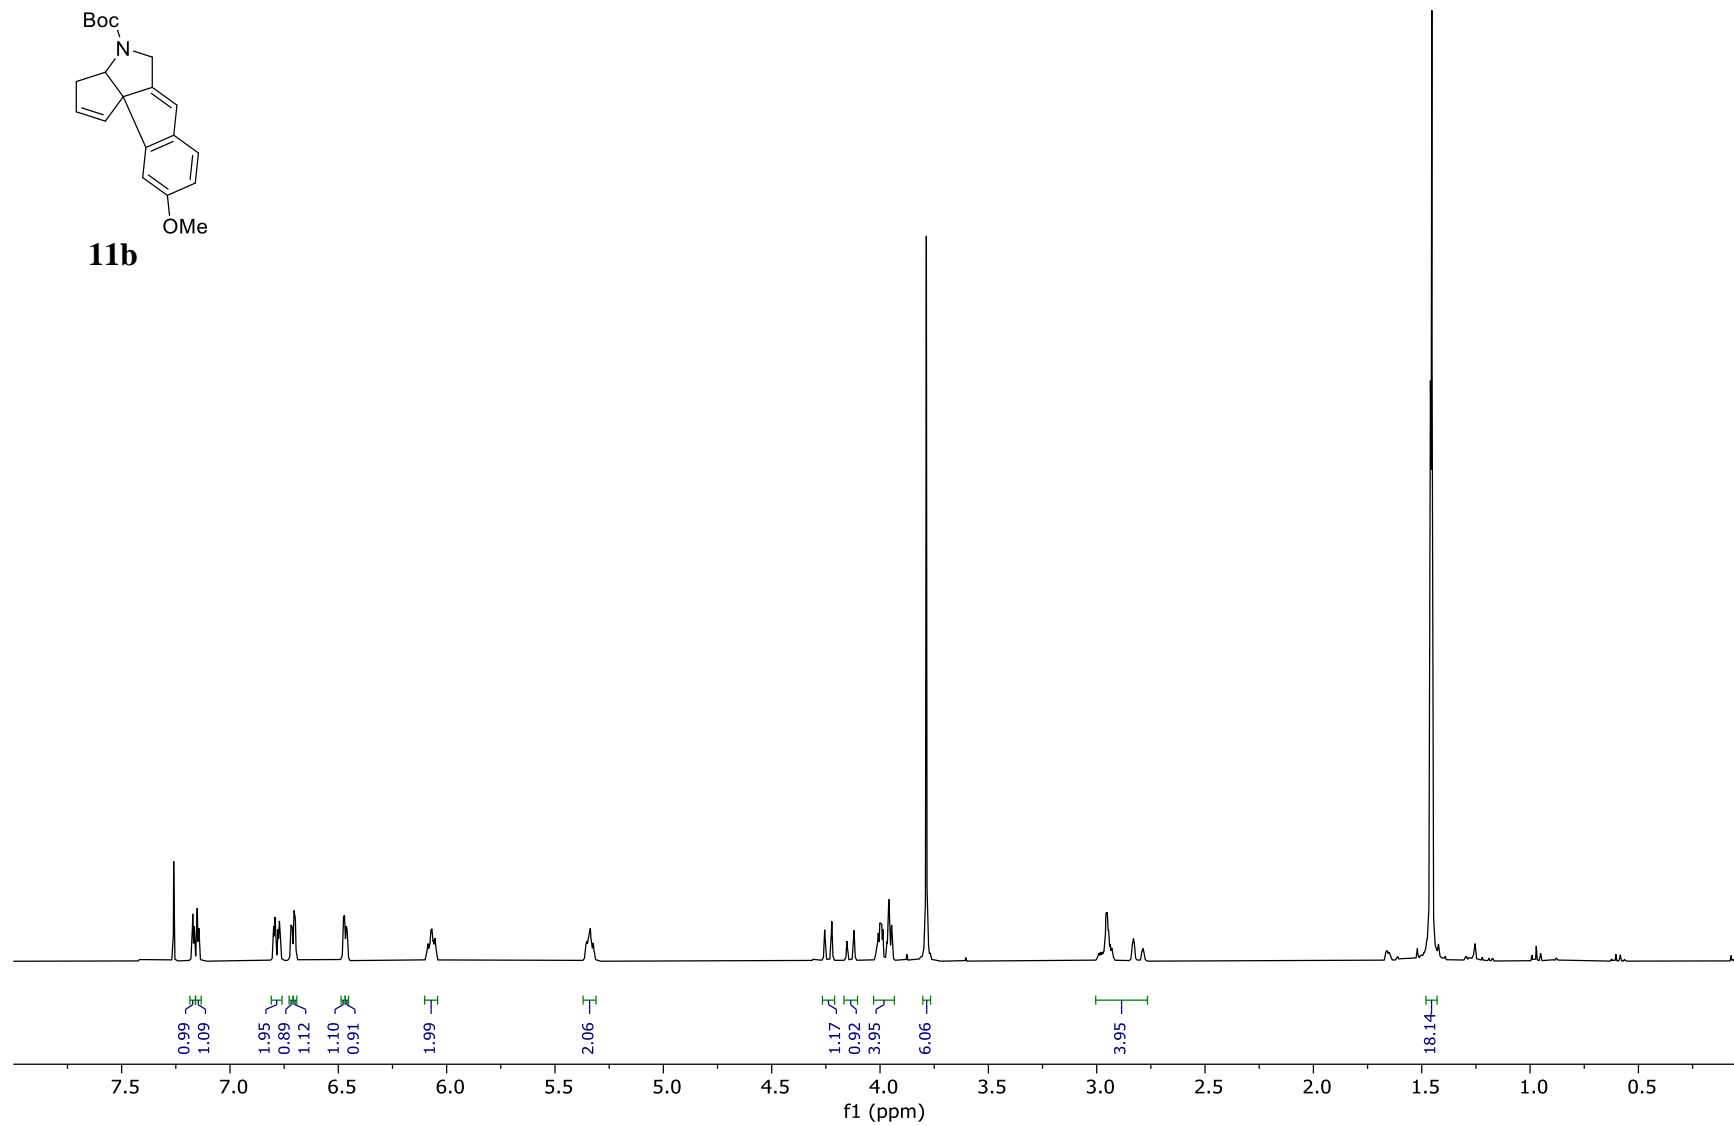

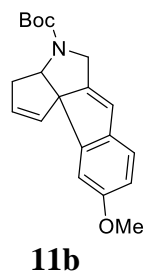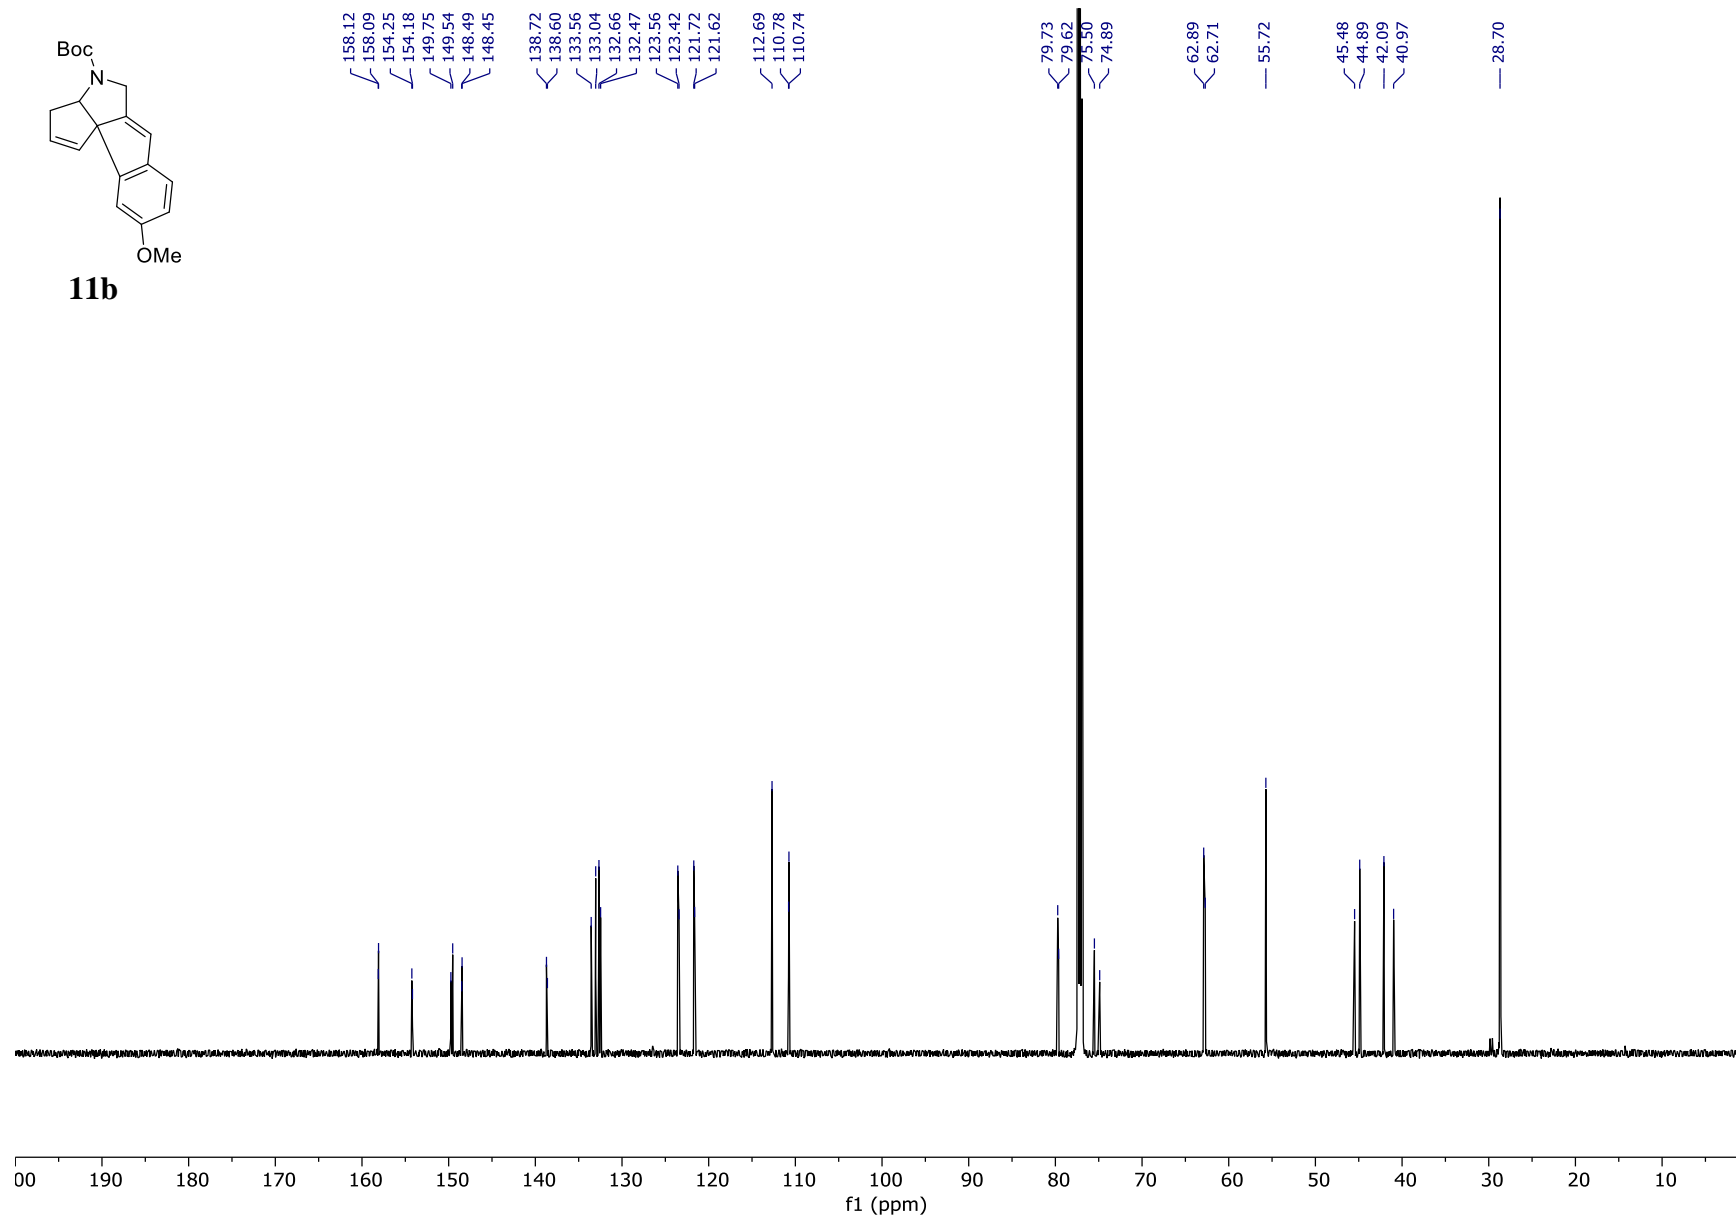

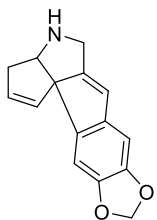**12a**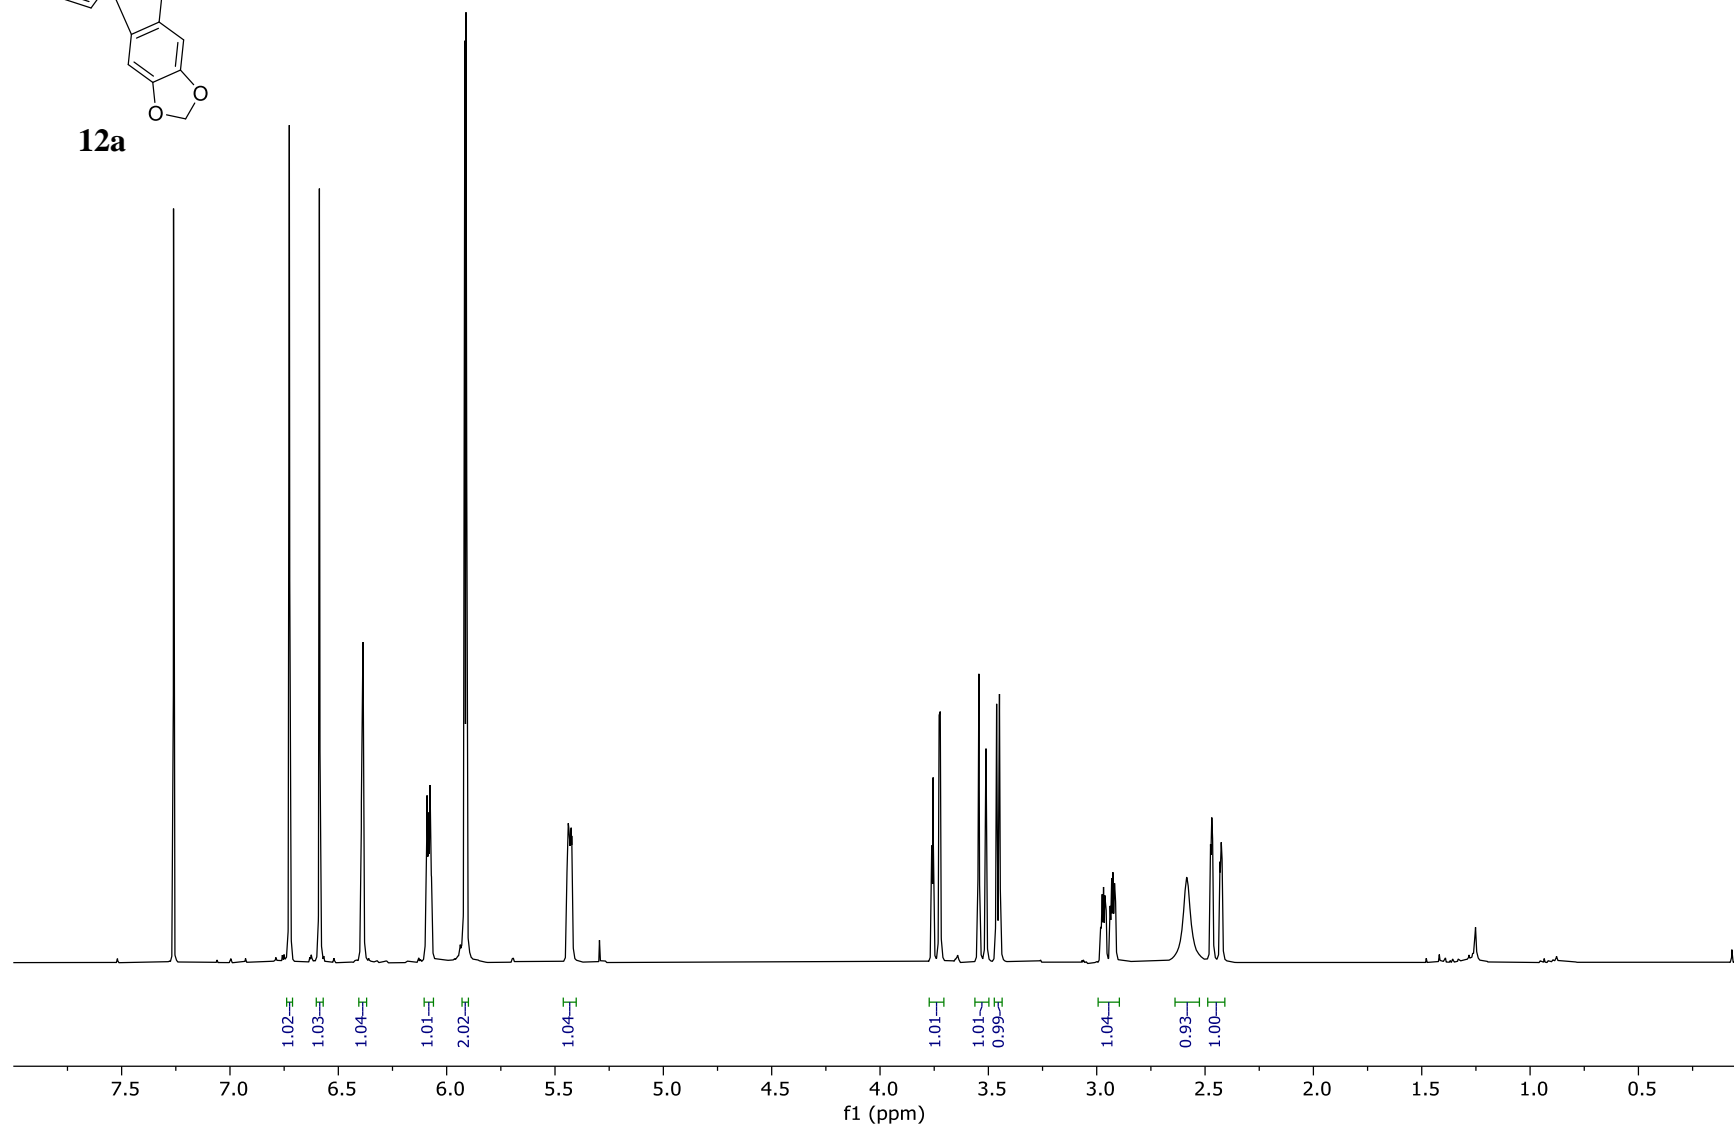

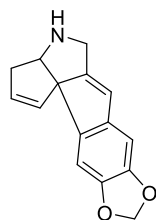**12a**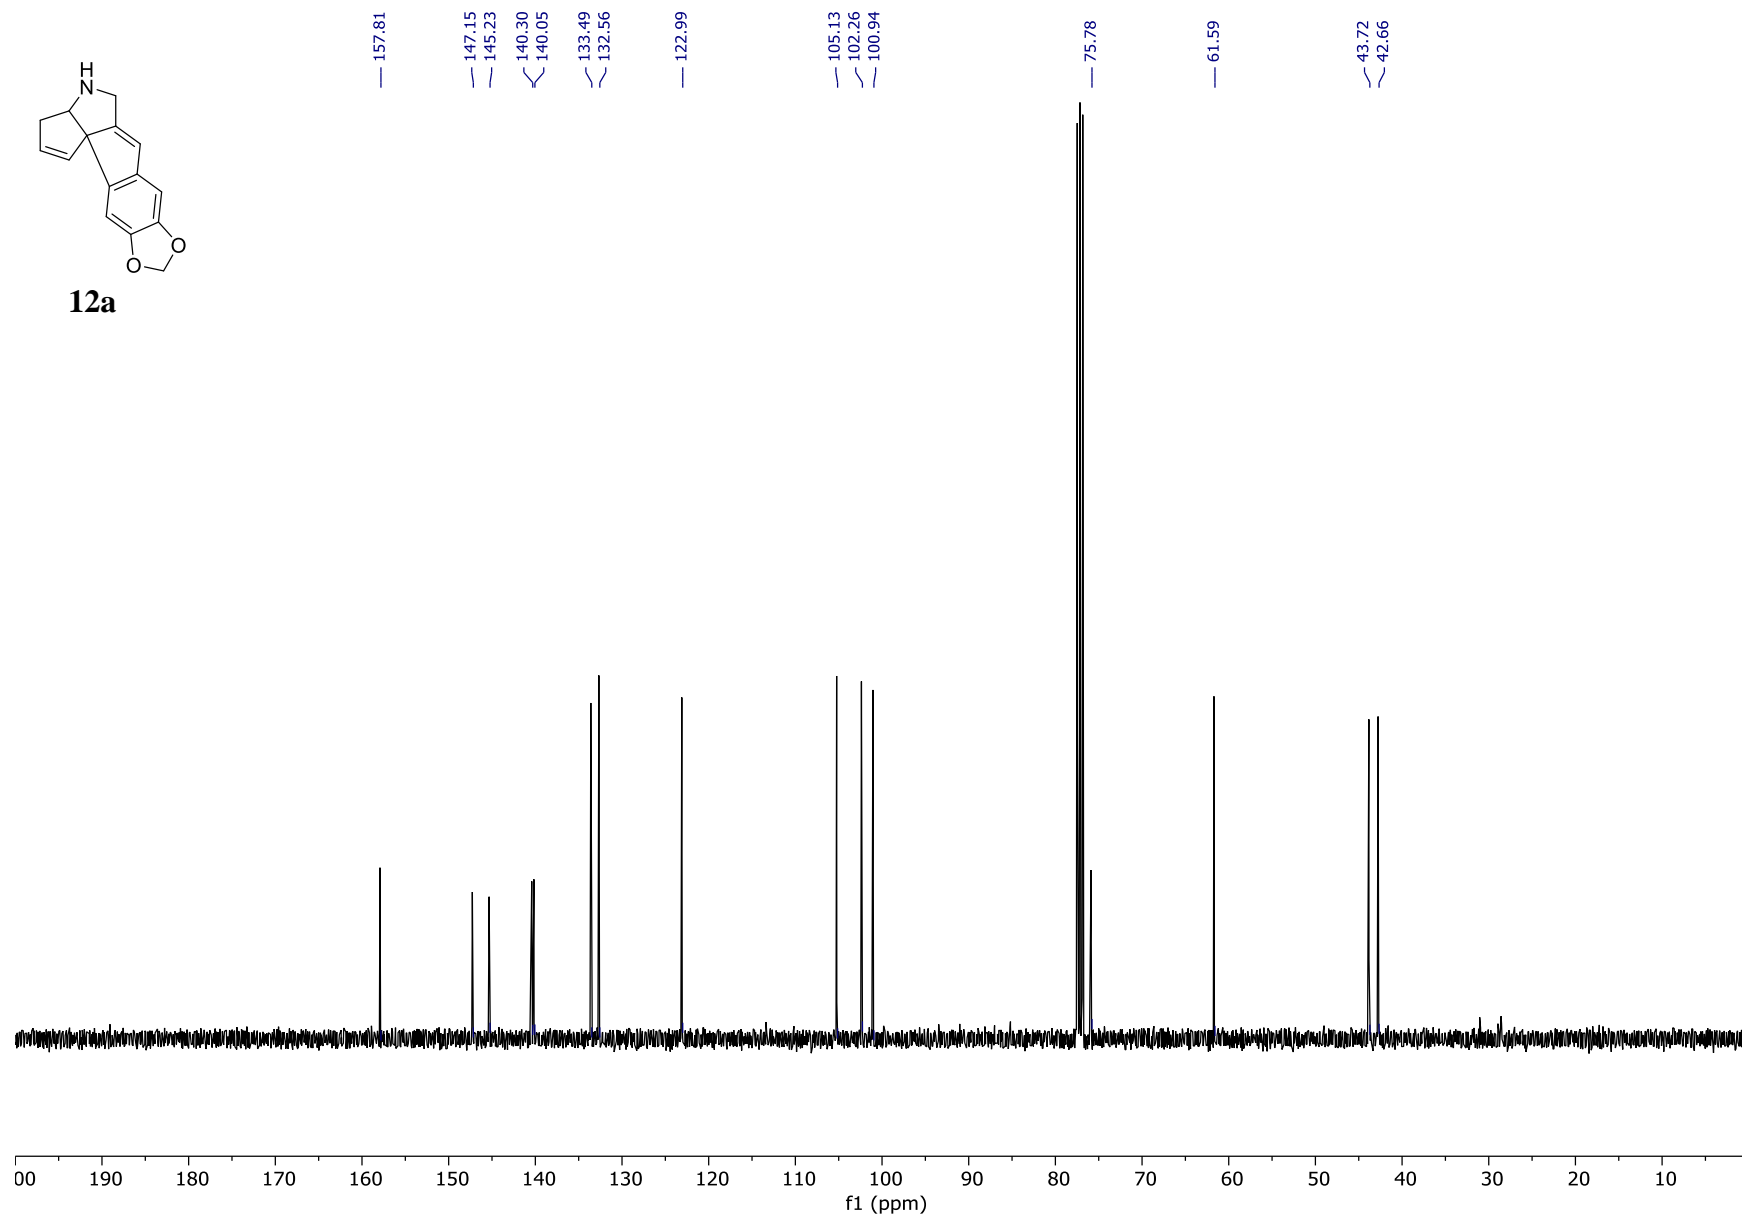

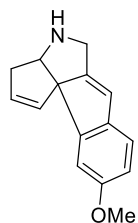**12b**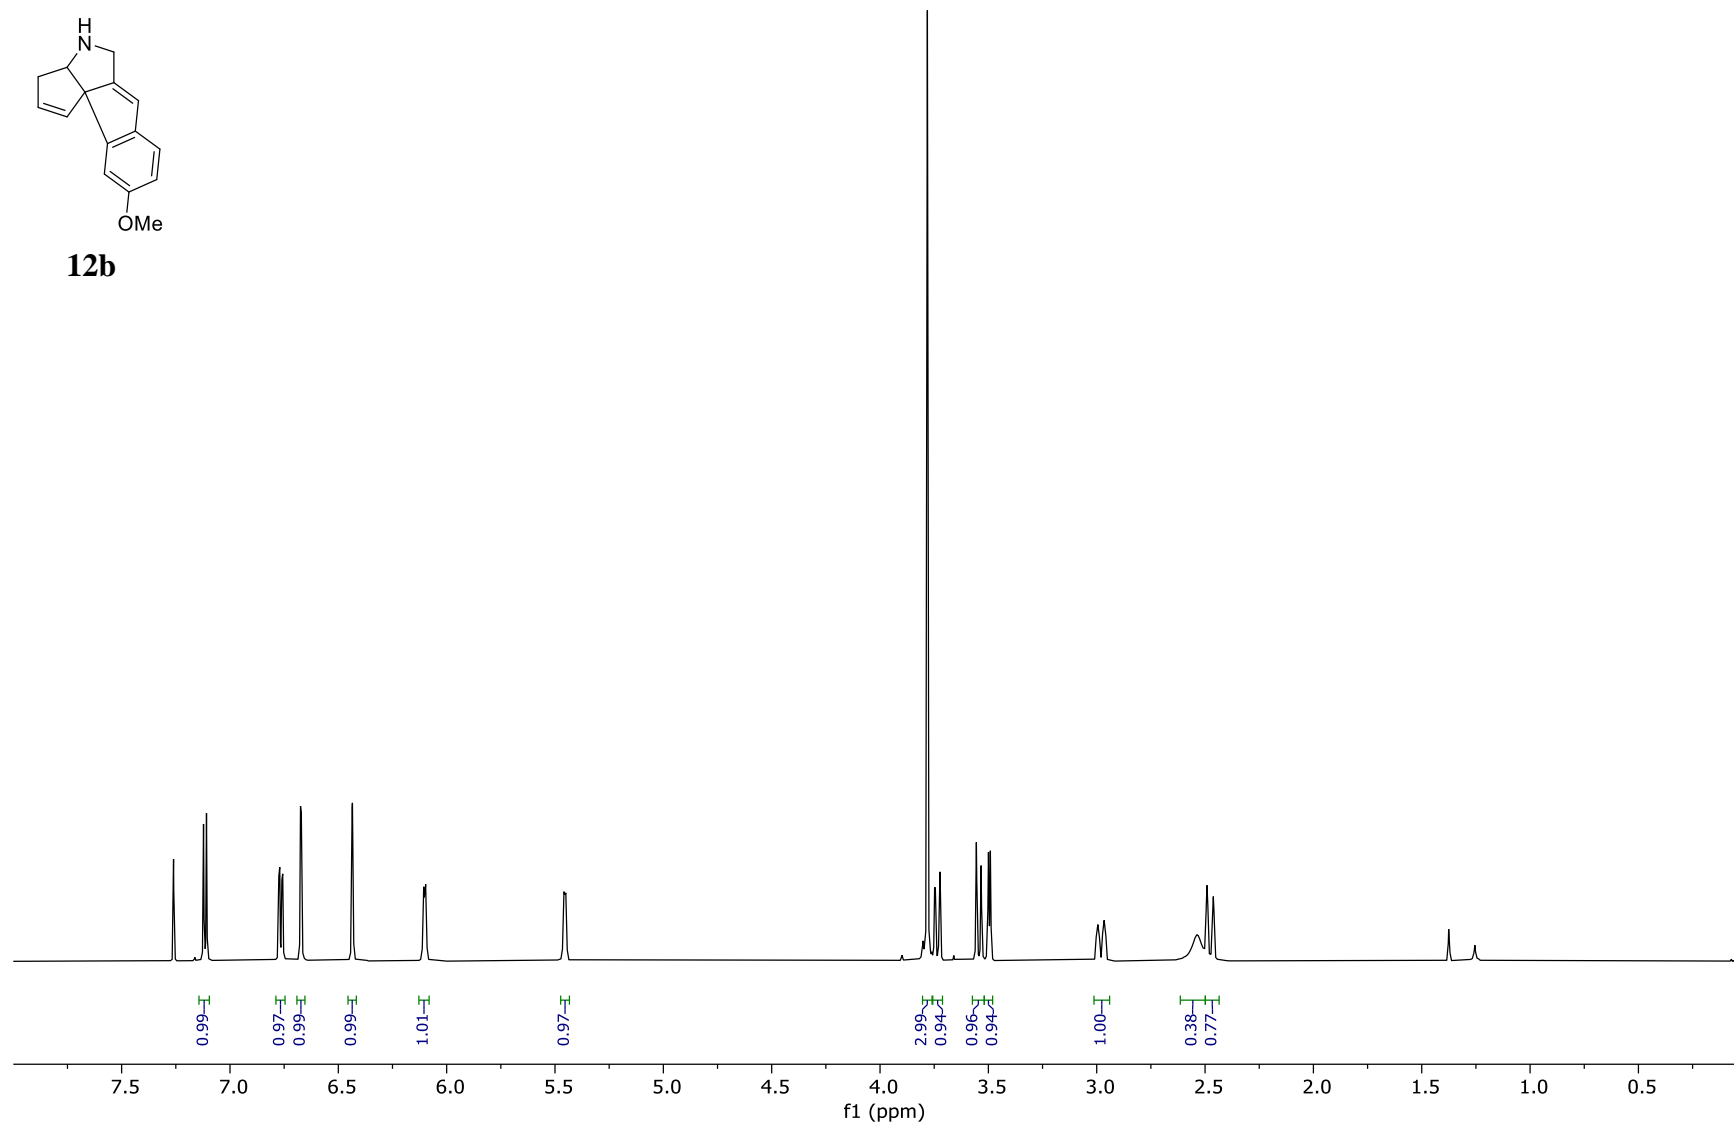



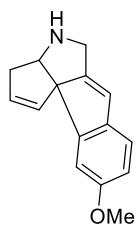**12b**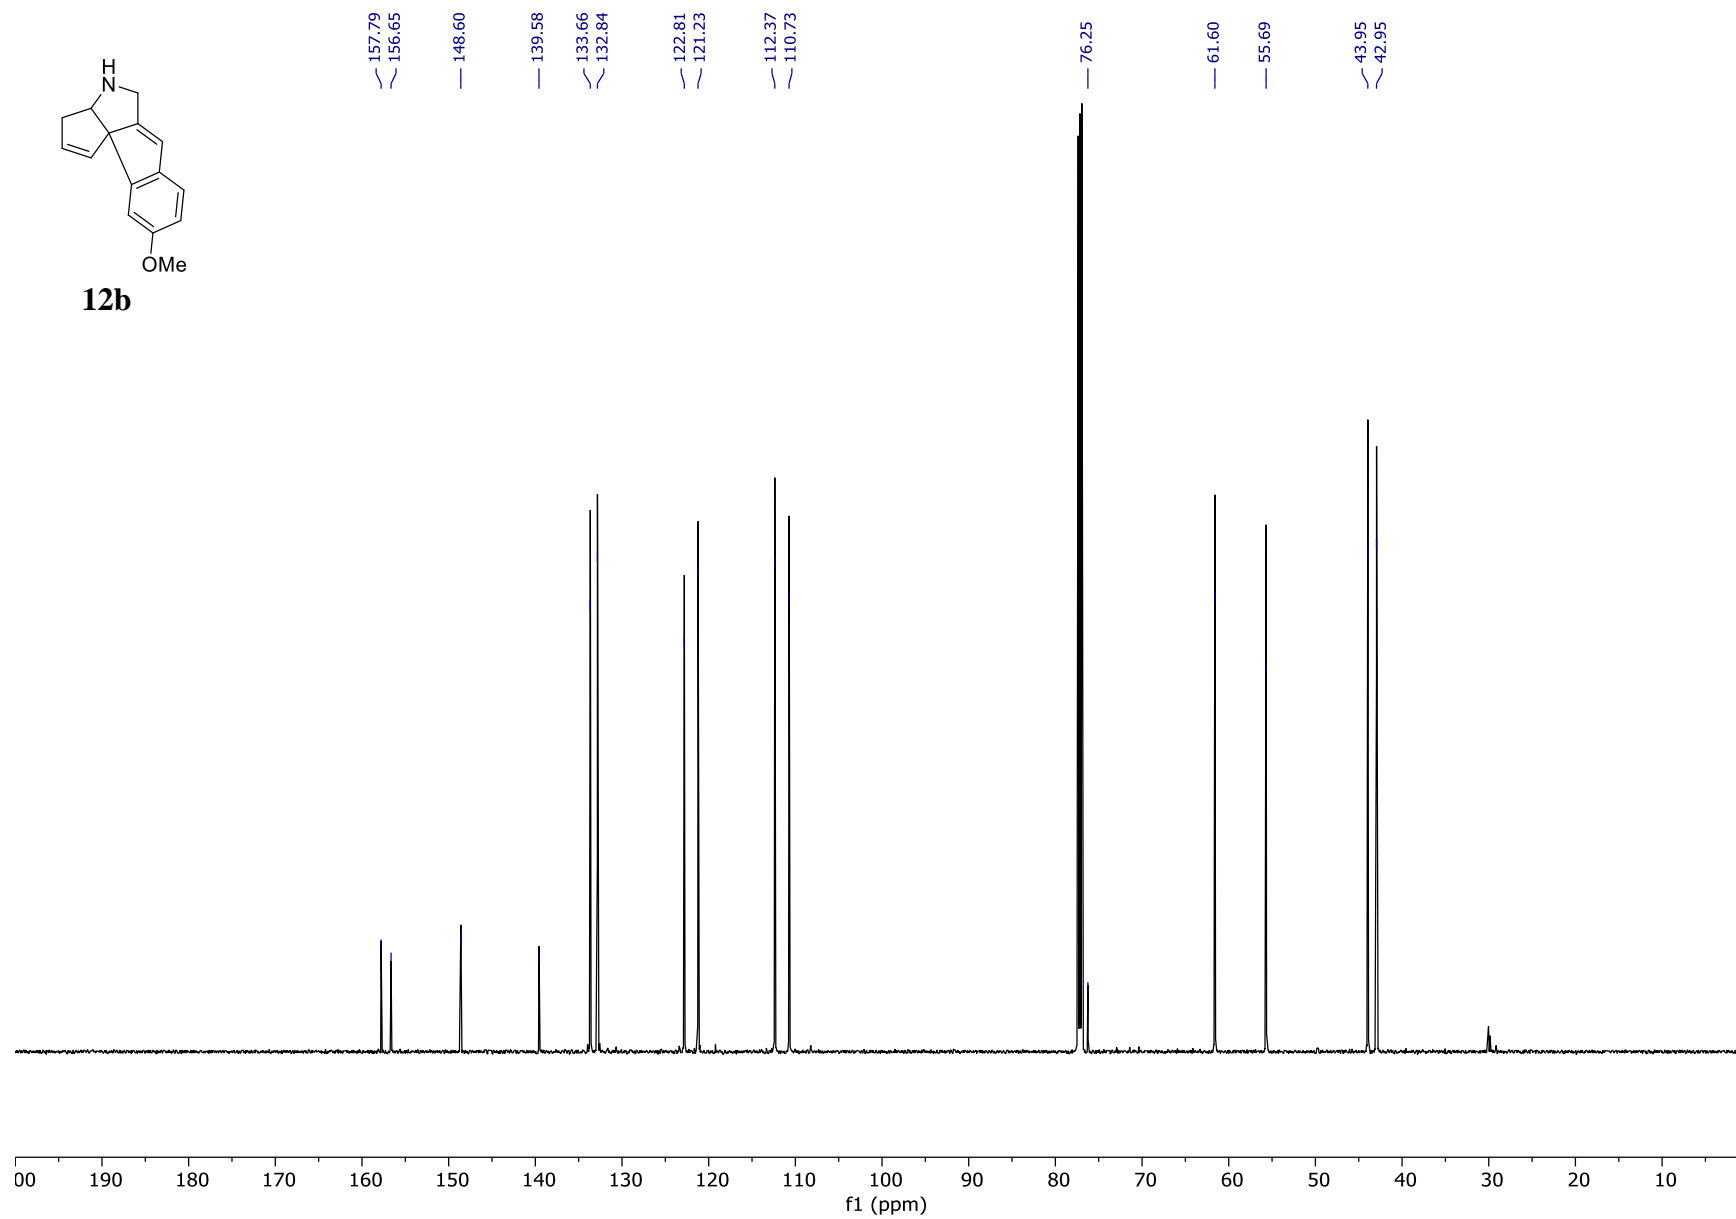

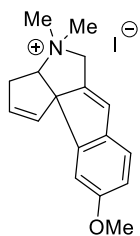**13b**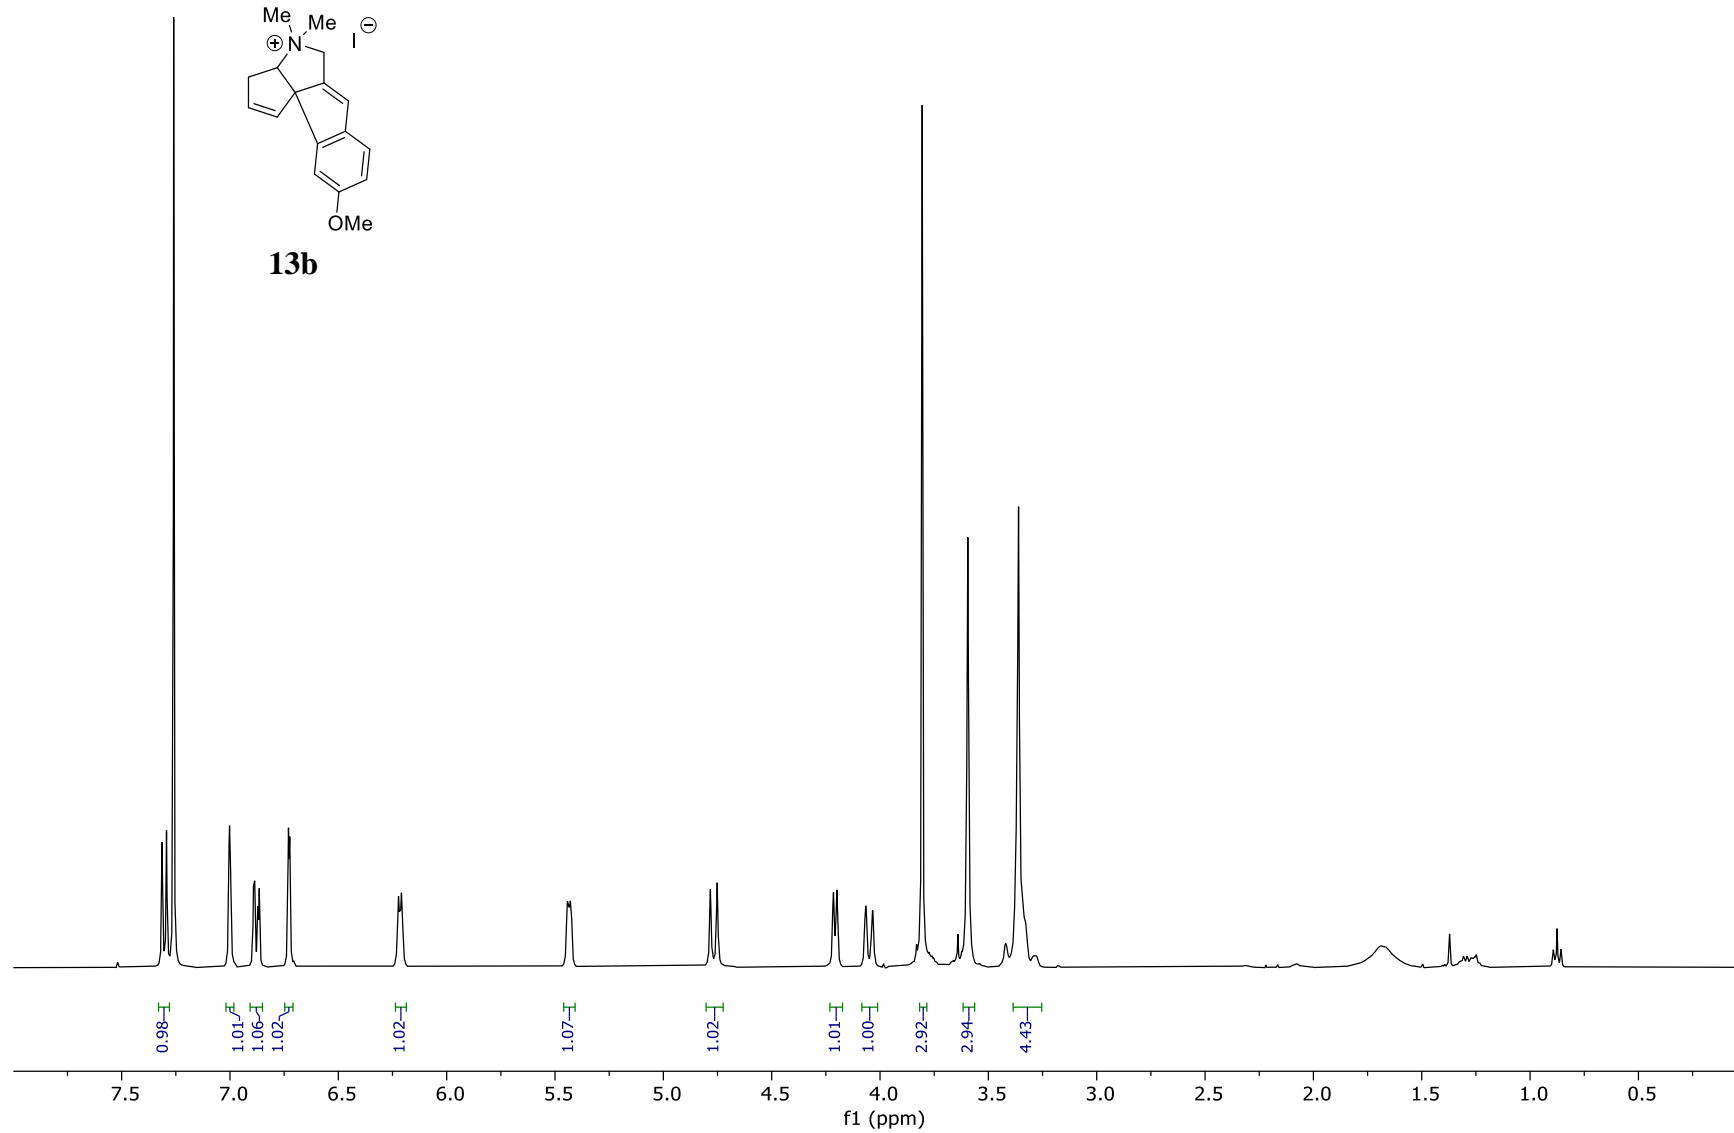

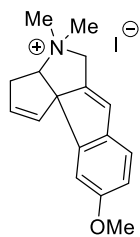**13b**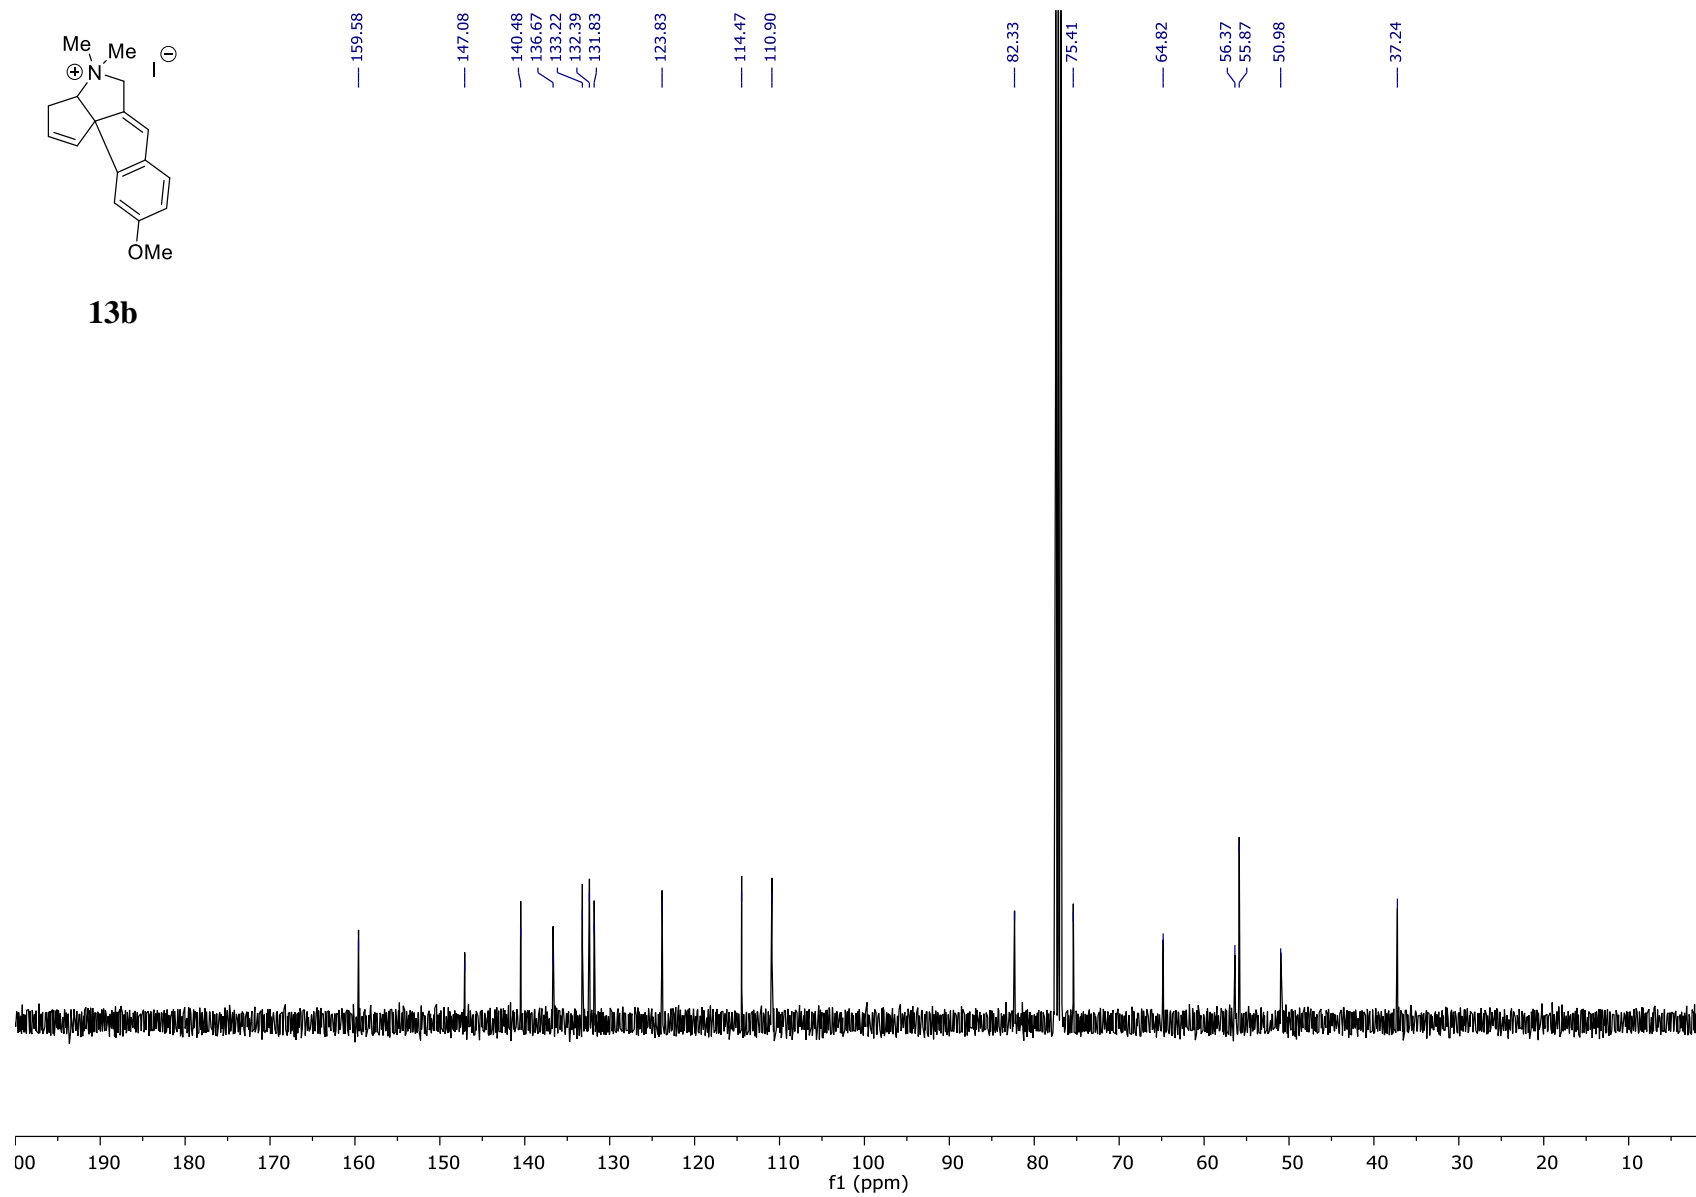

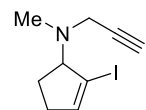

SI2

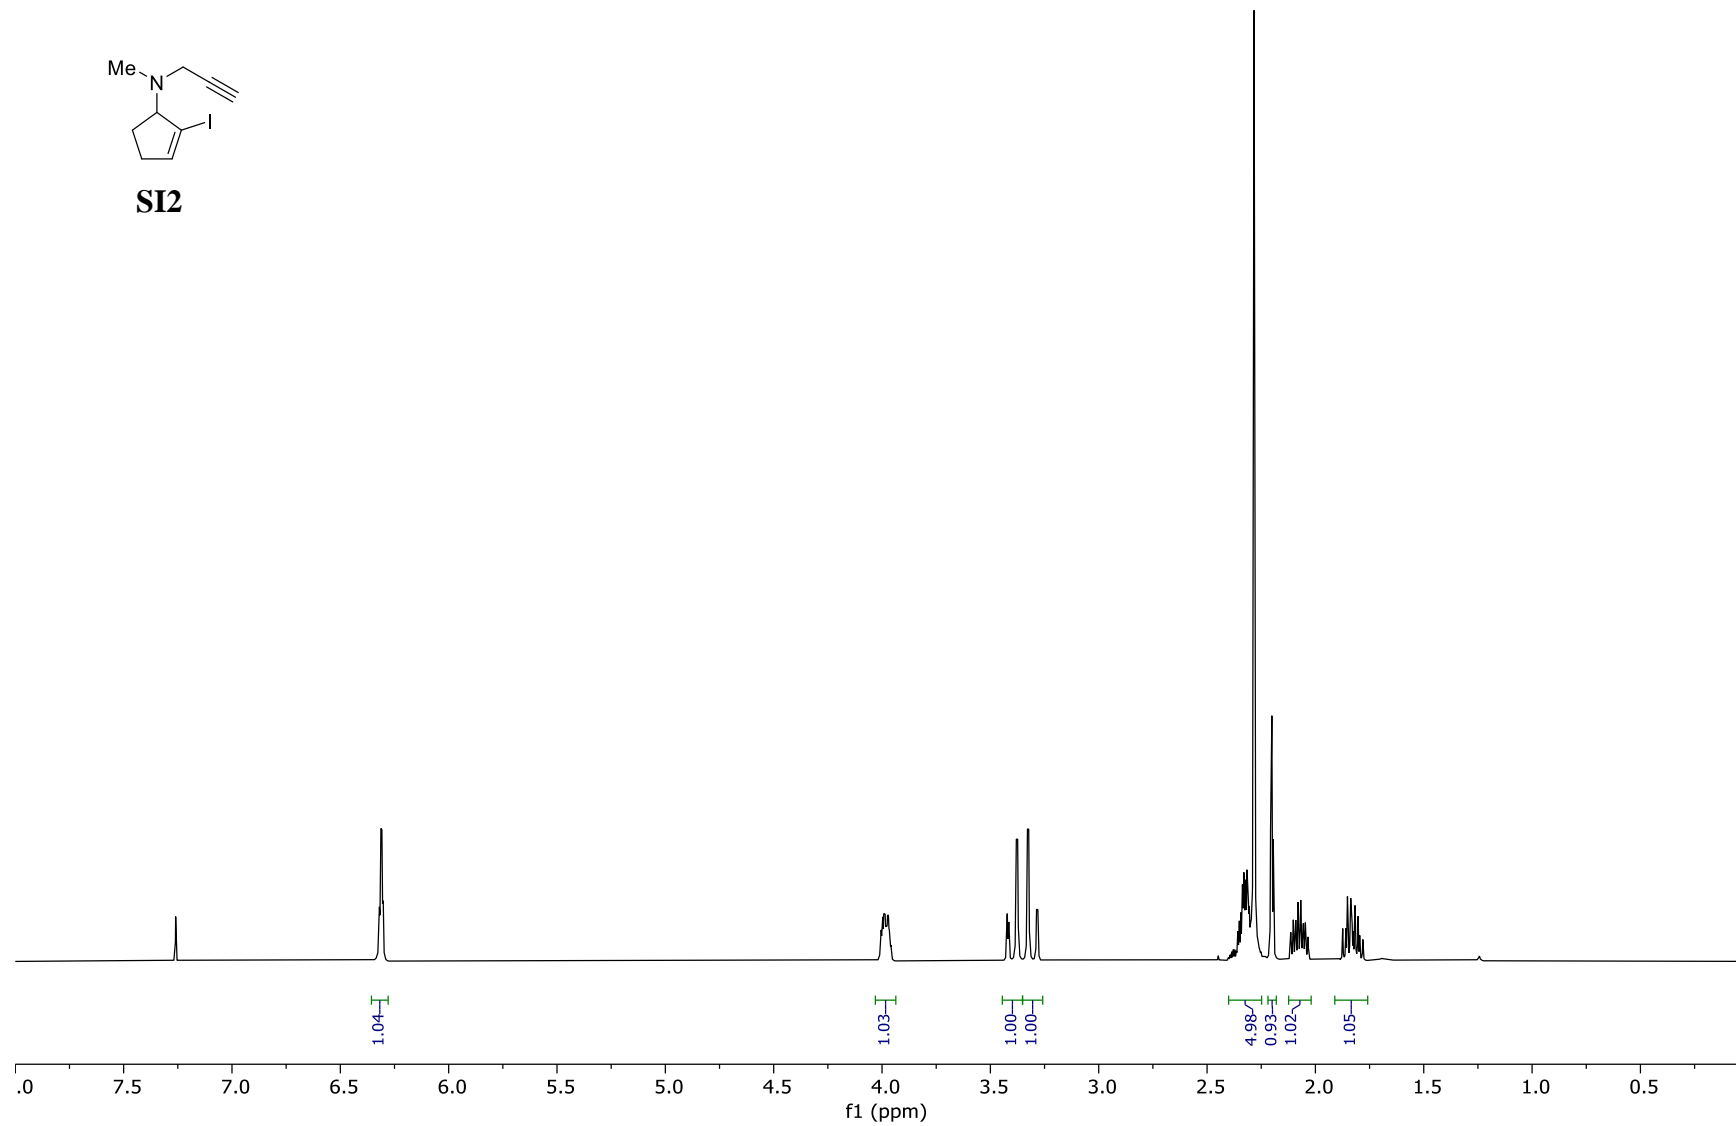

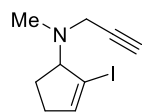

SI2

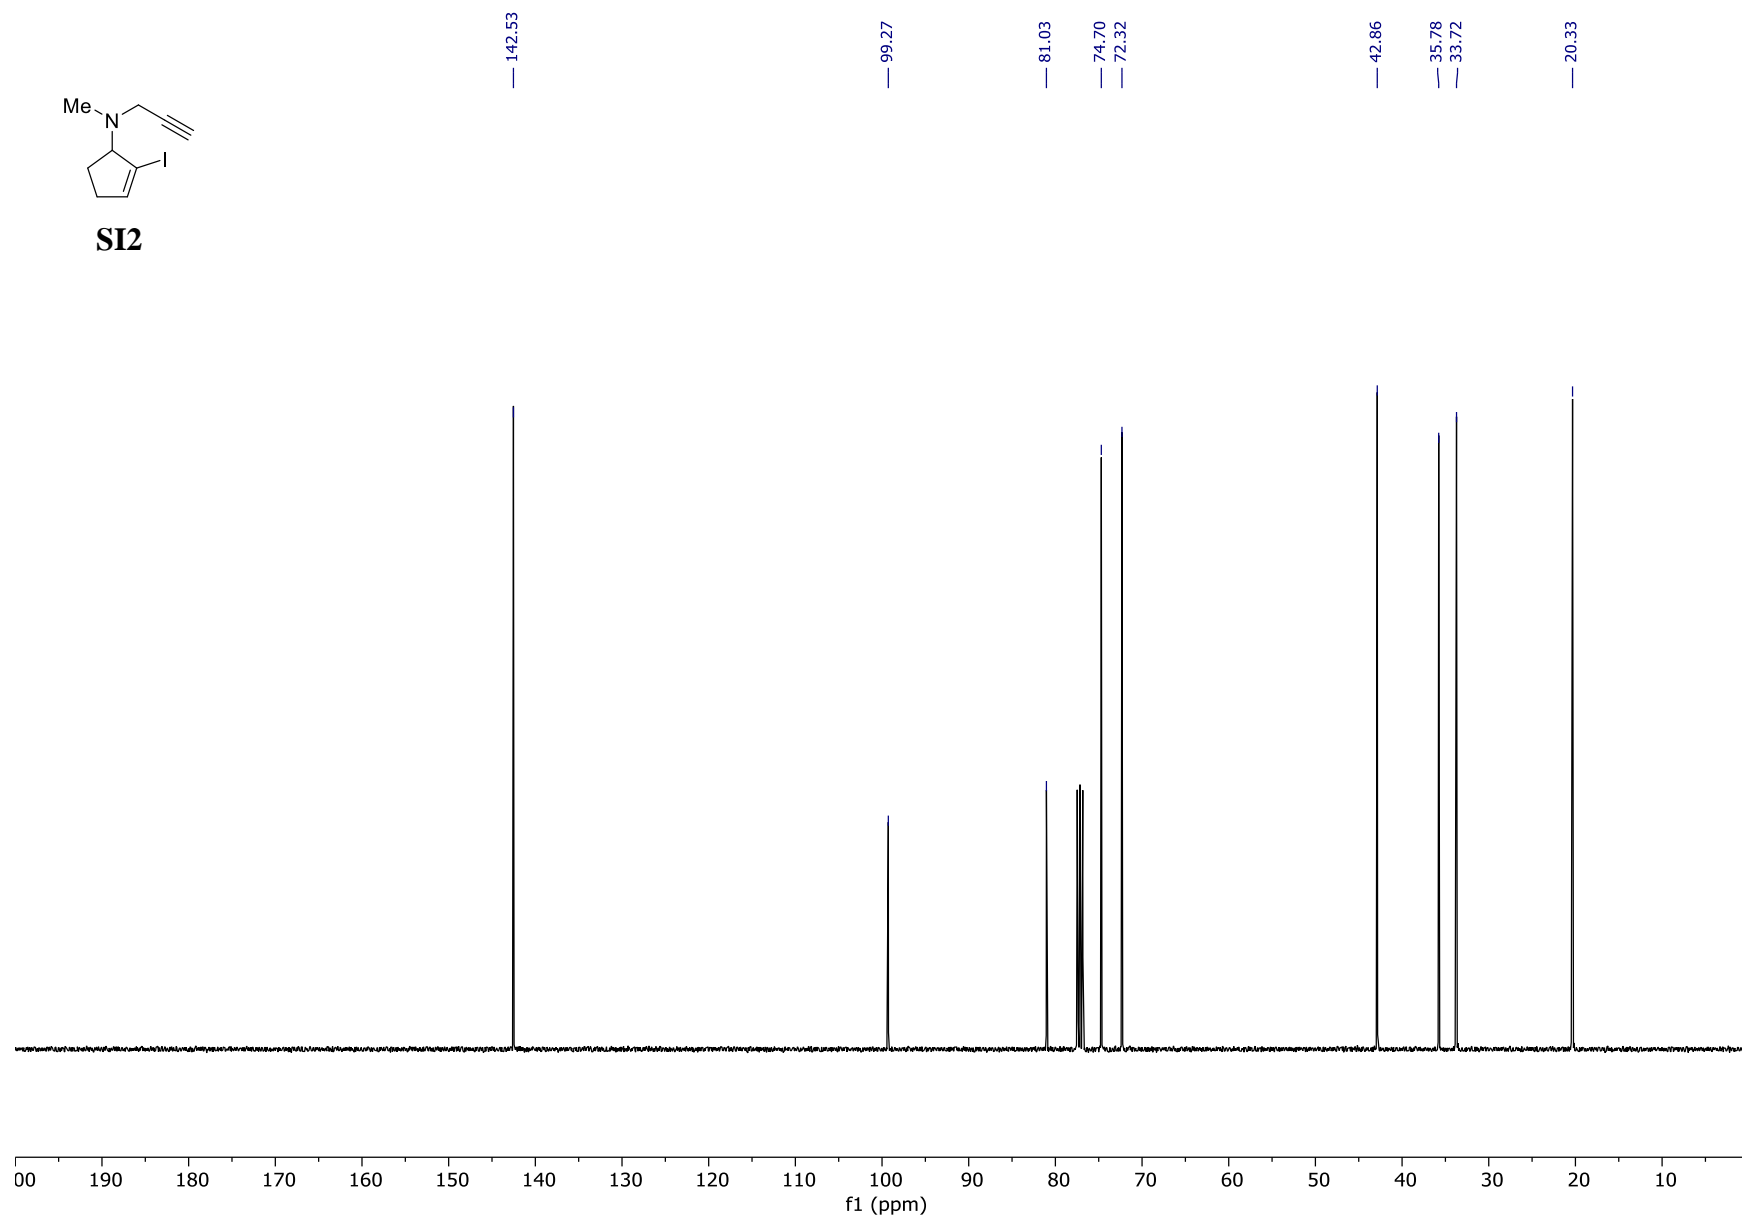

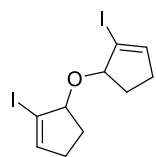**SI3**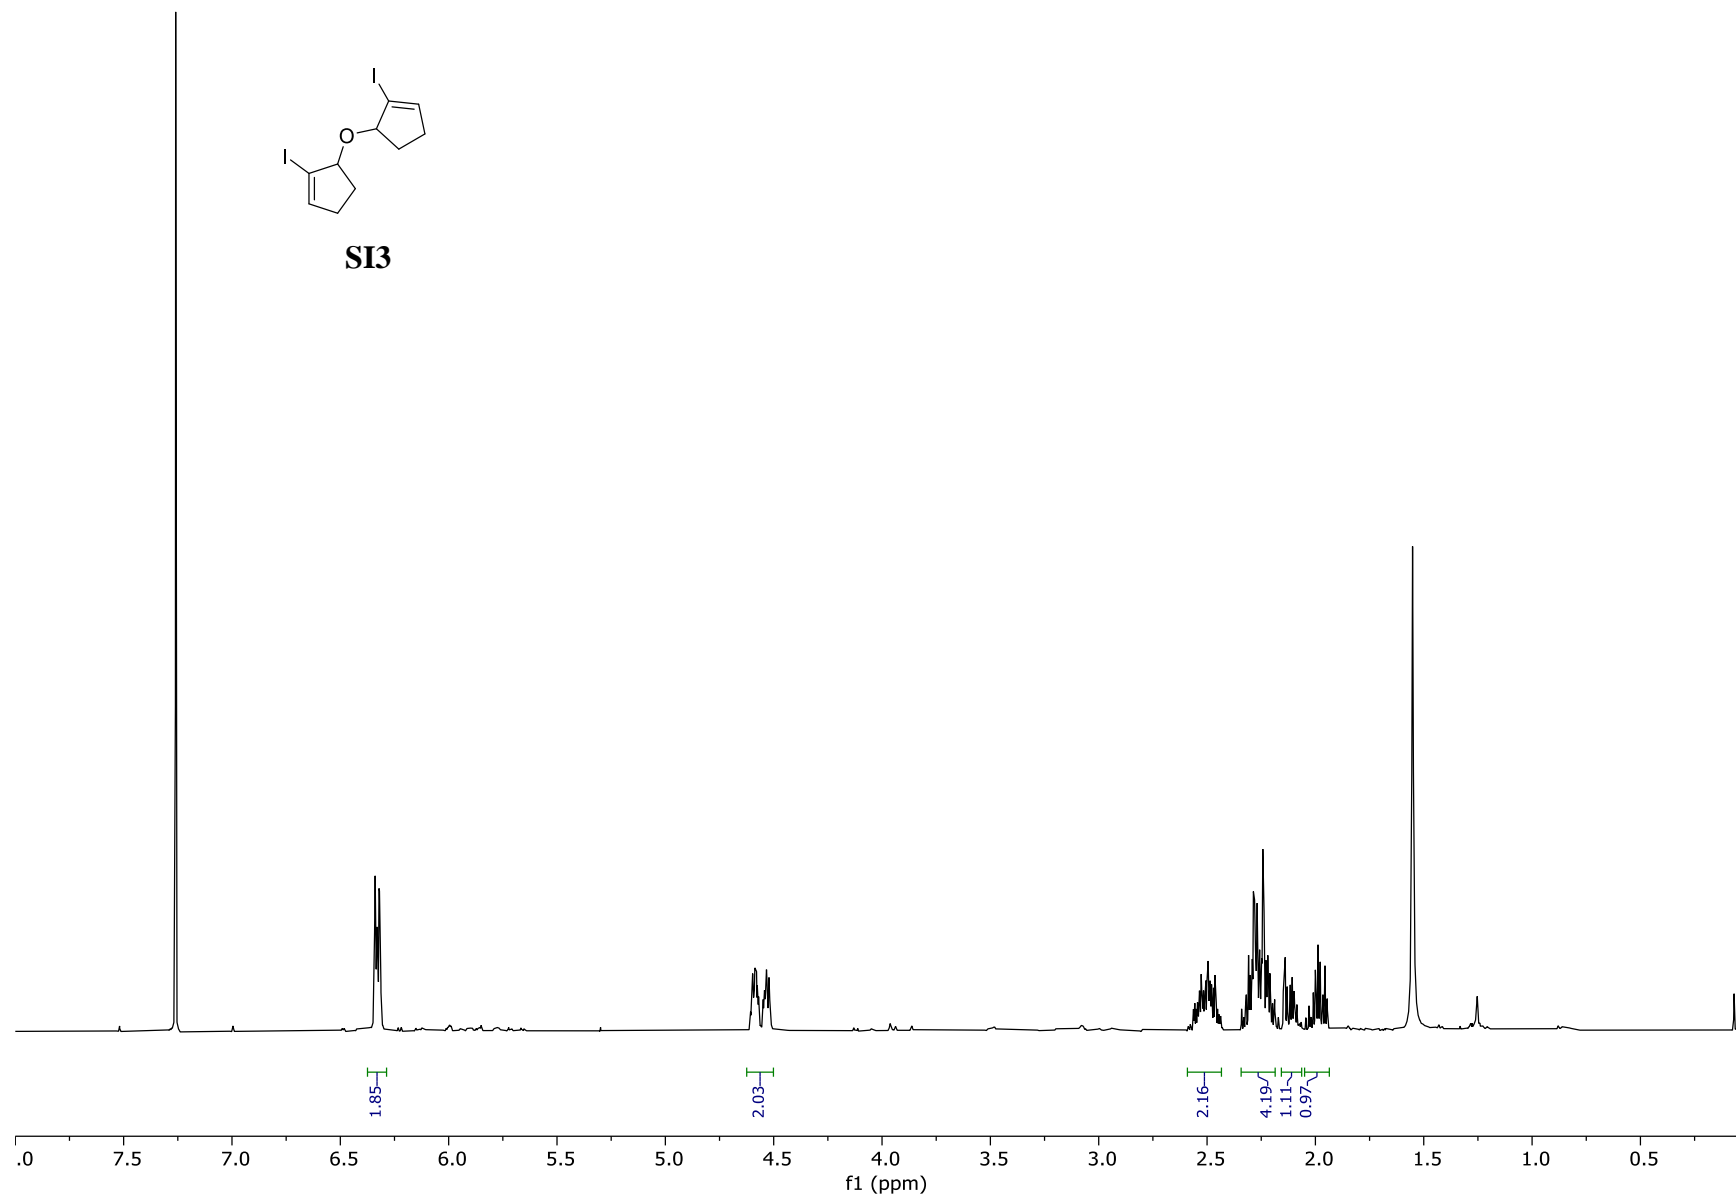

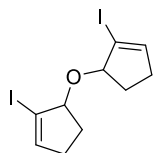

SI3

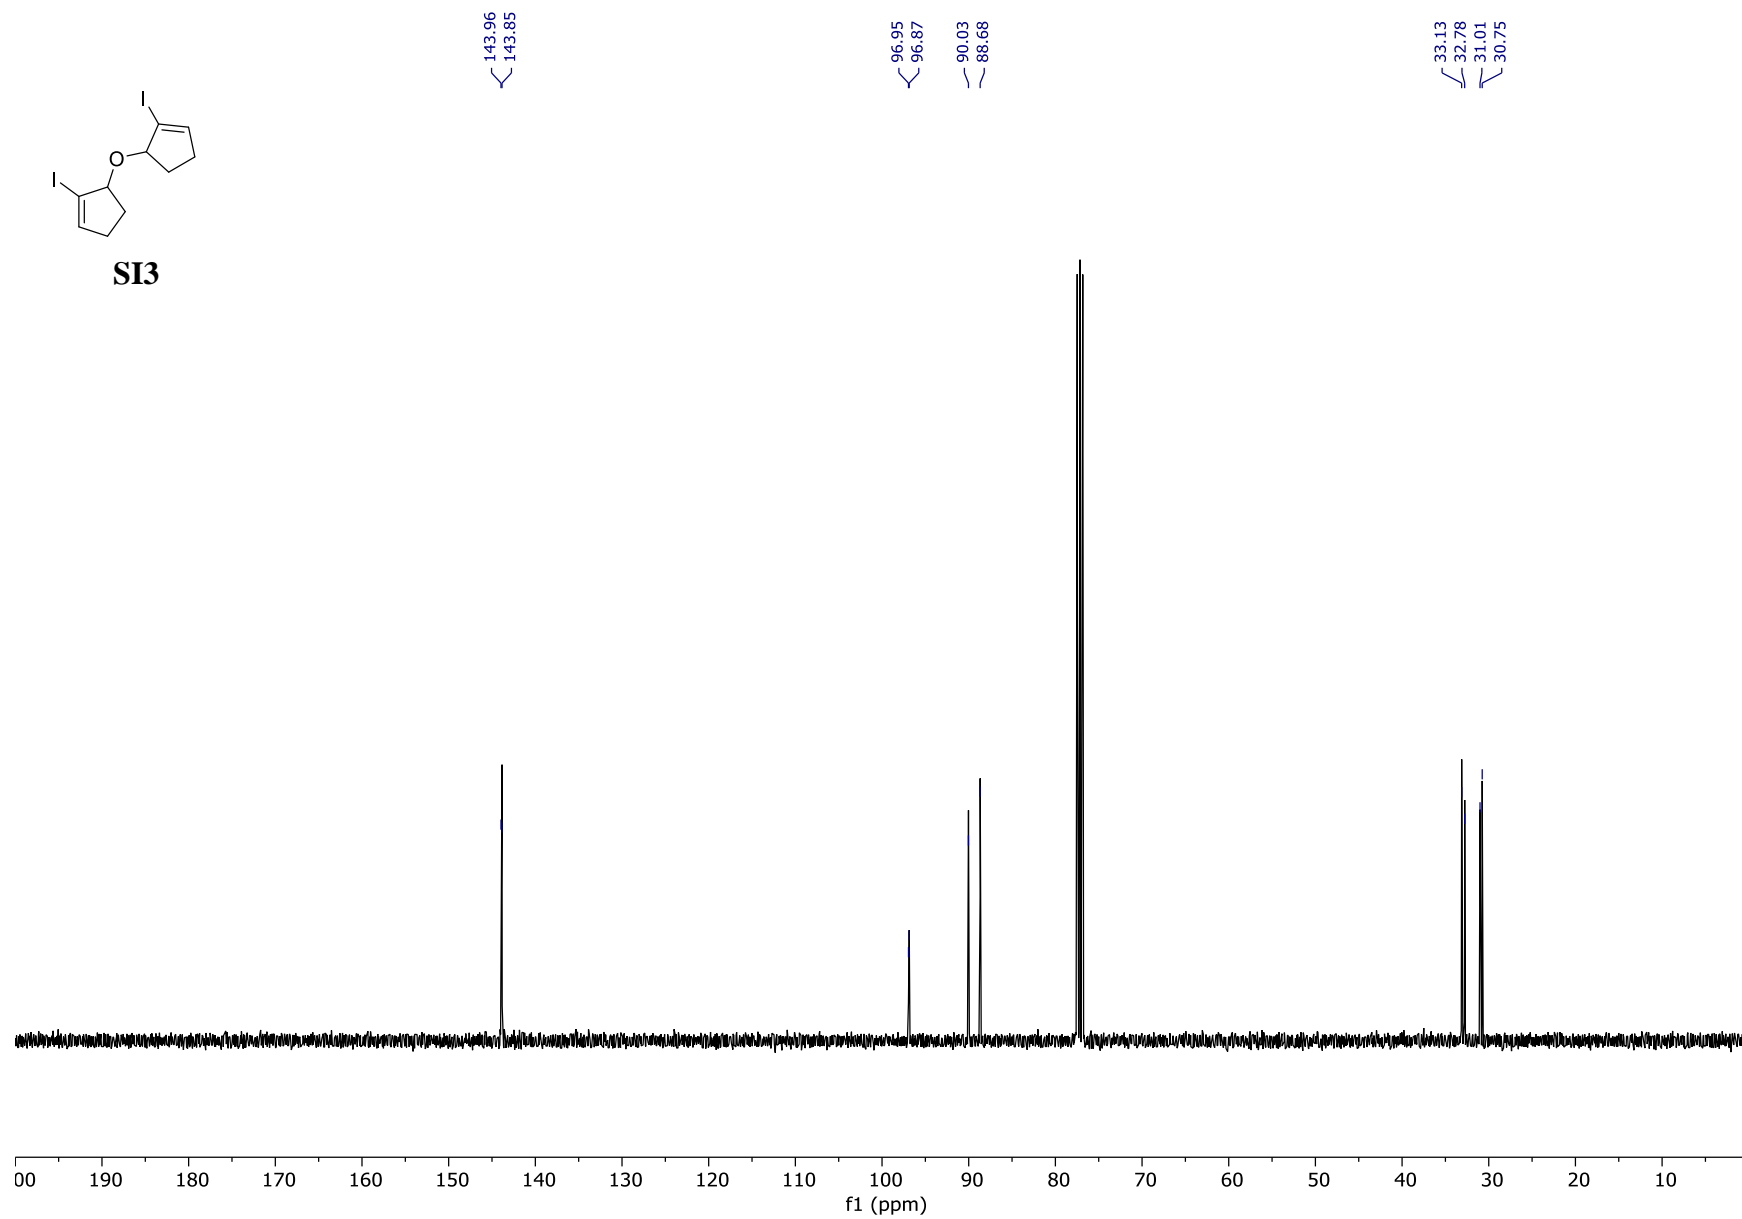

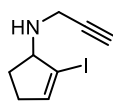

SI4

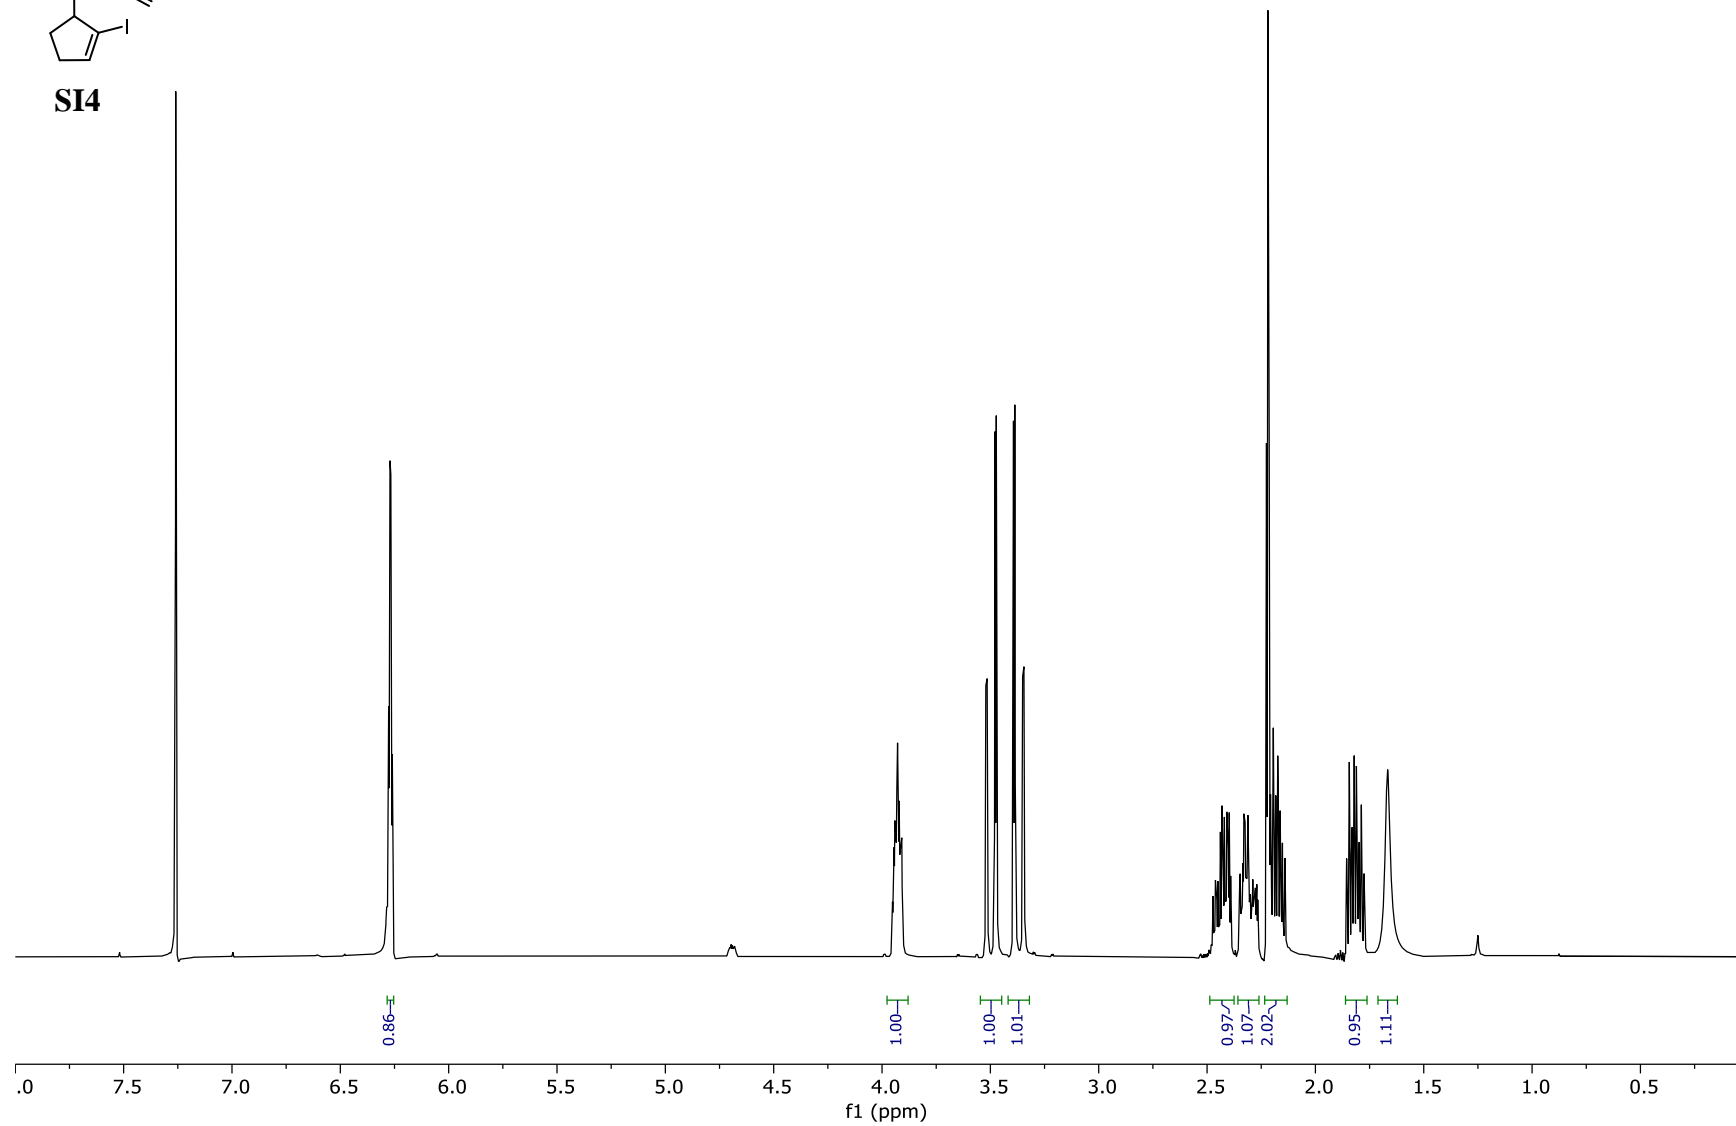



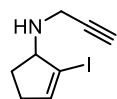

SI4

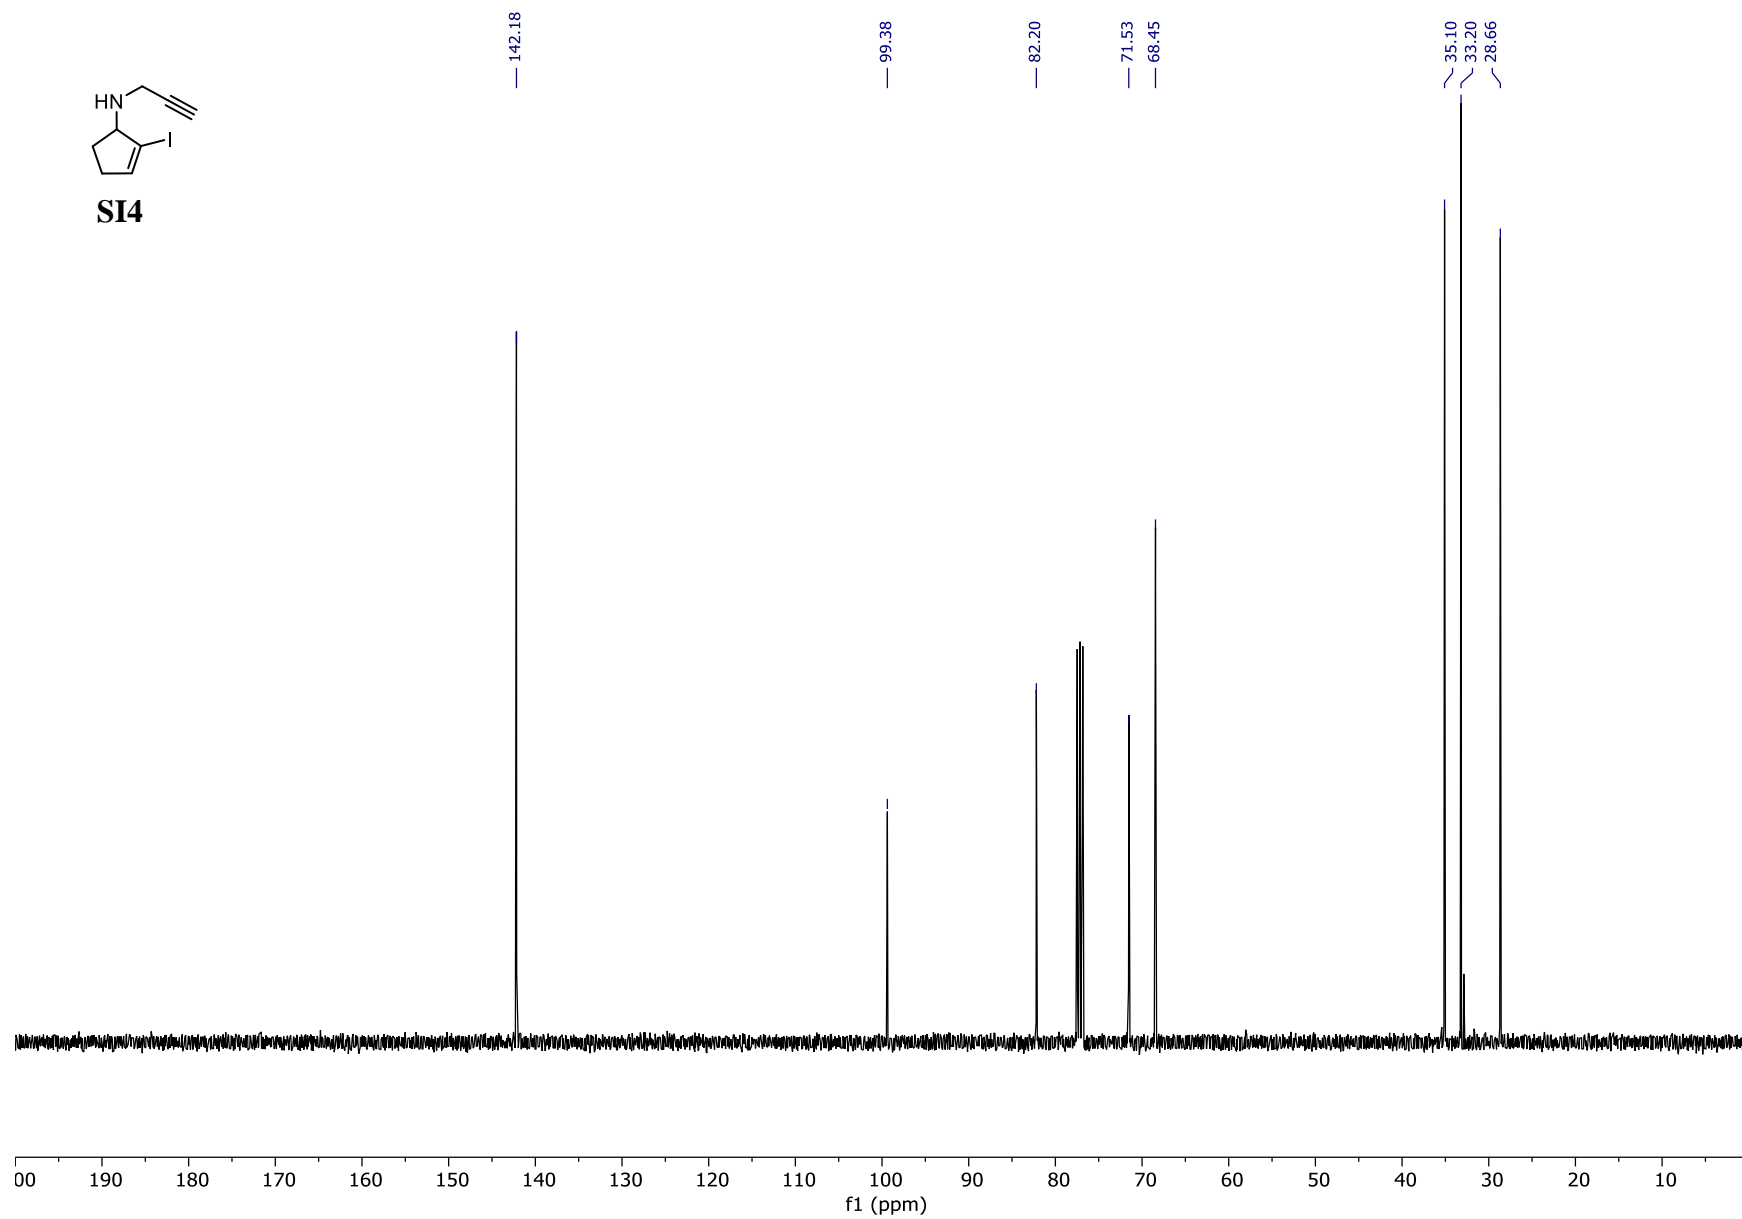

CDCl<sub>3</sub>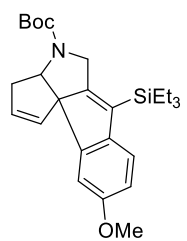**SI5b**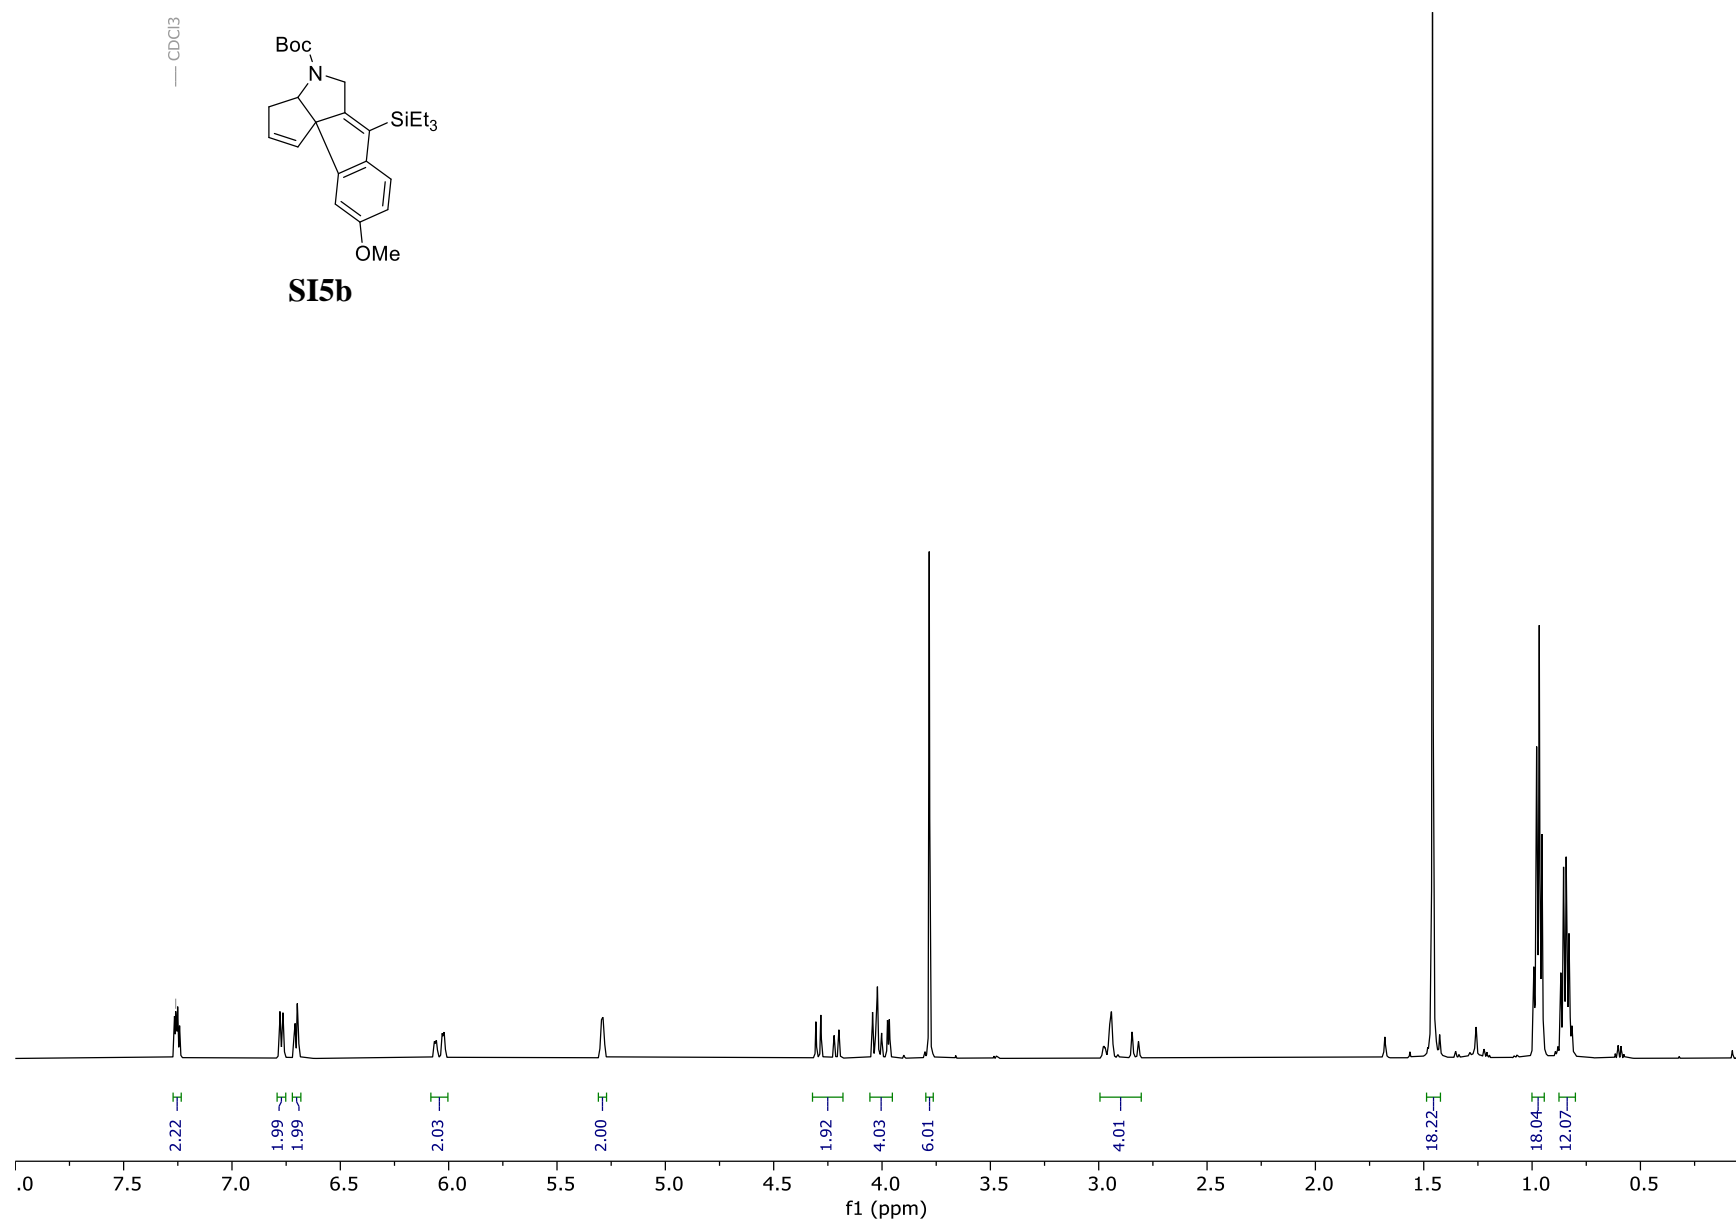

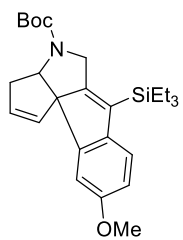

SI5b

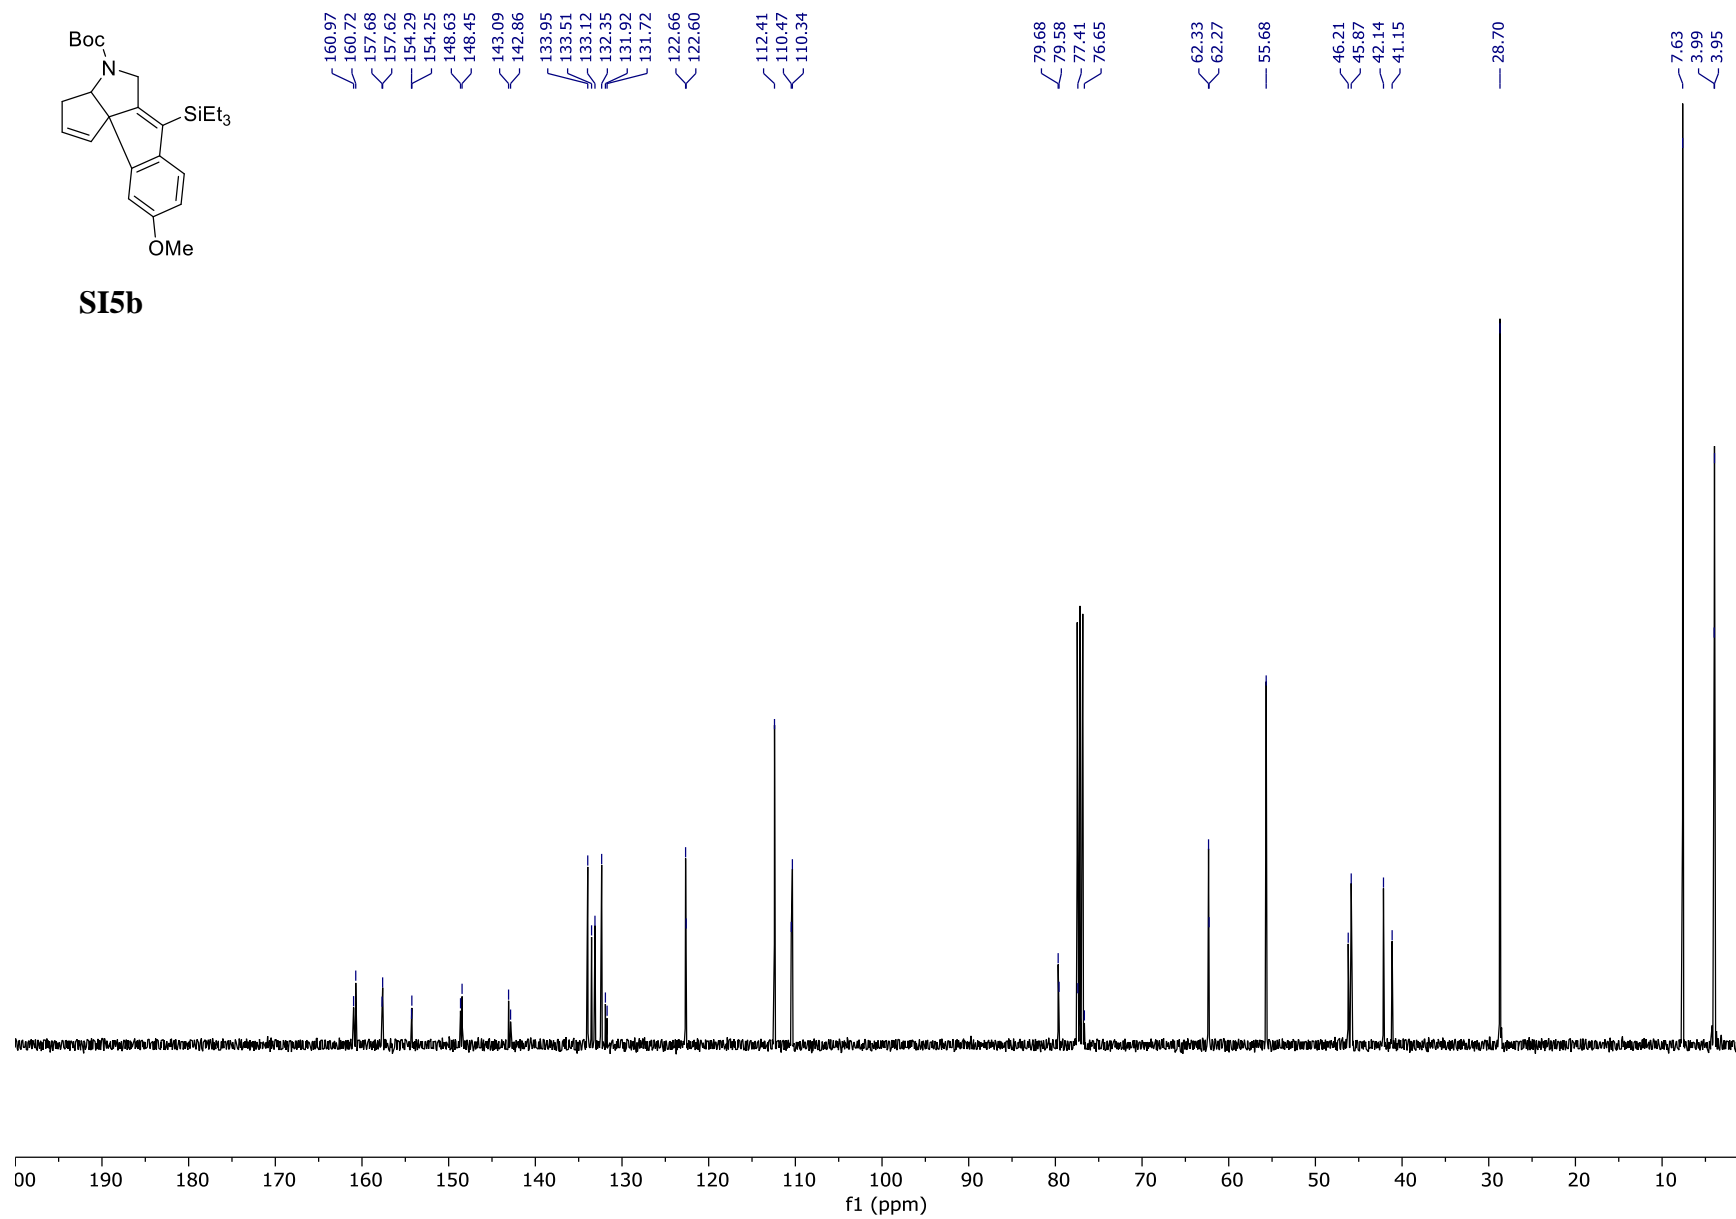

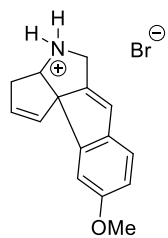**SI6b**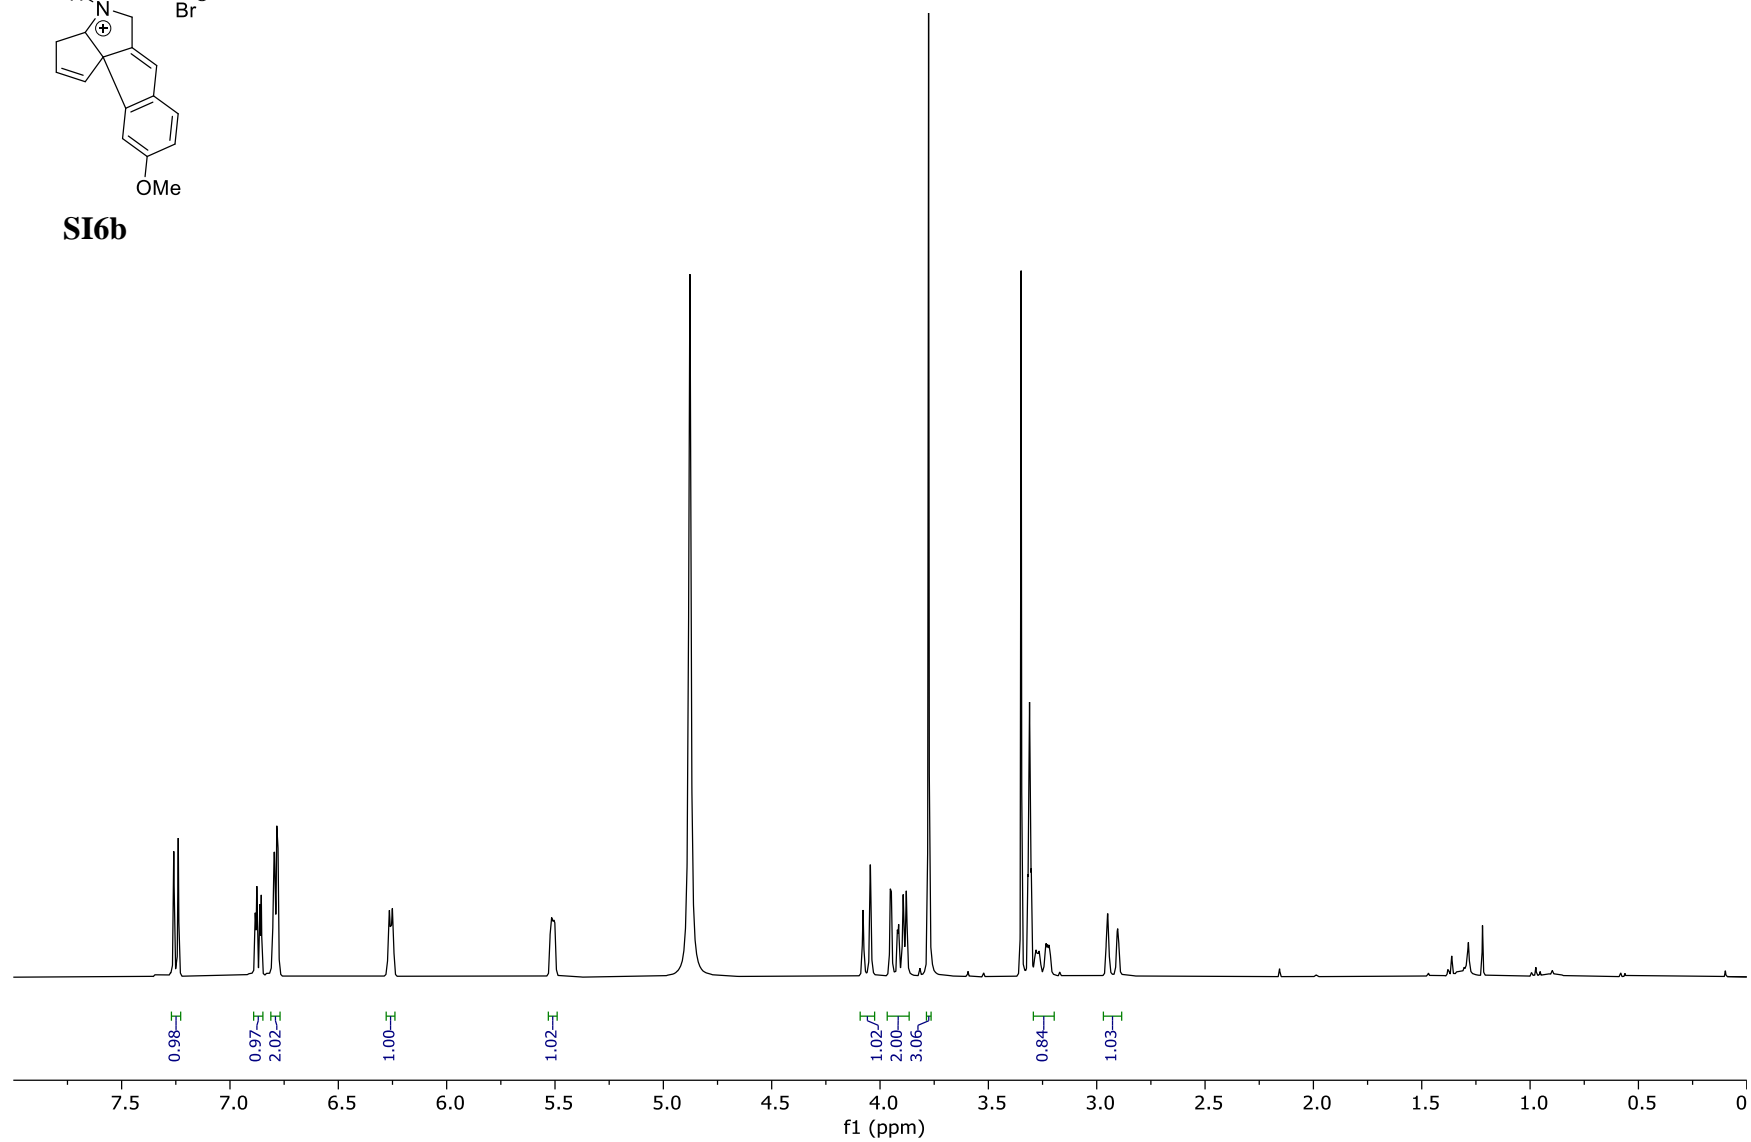

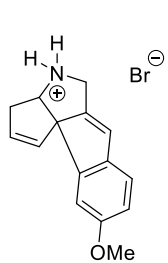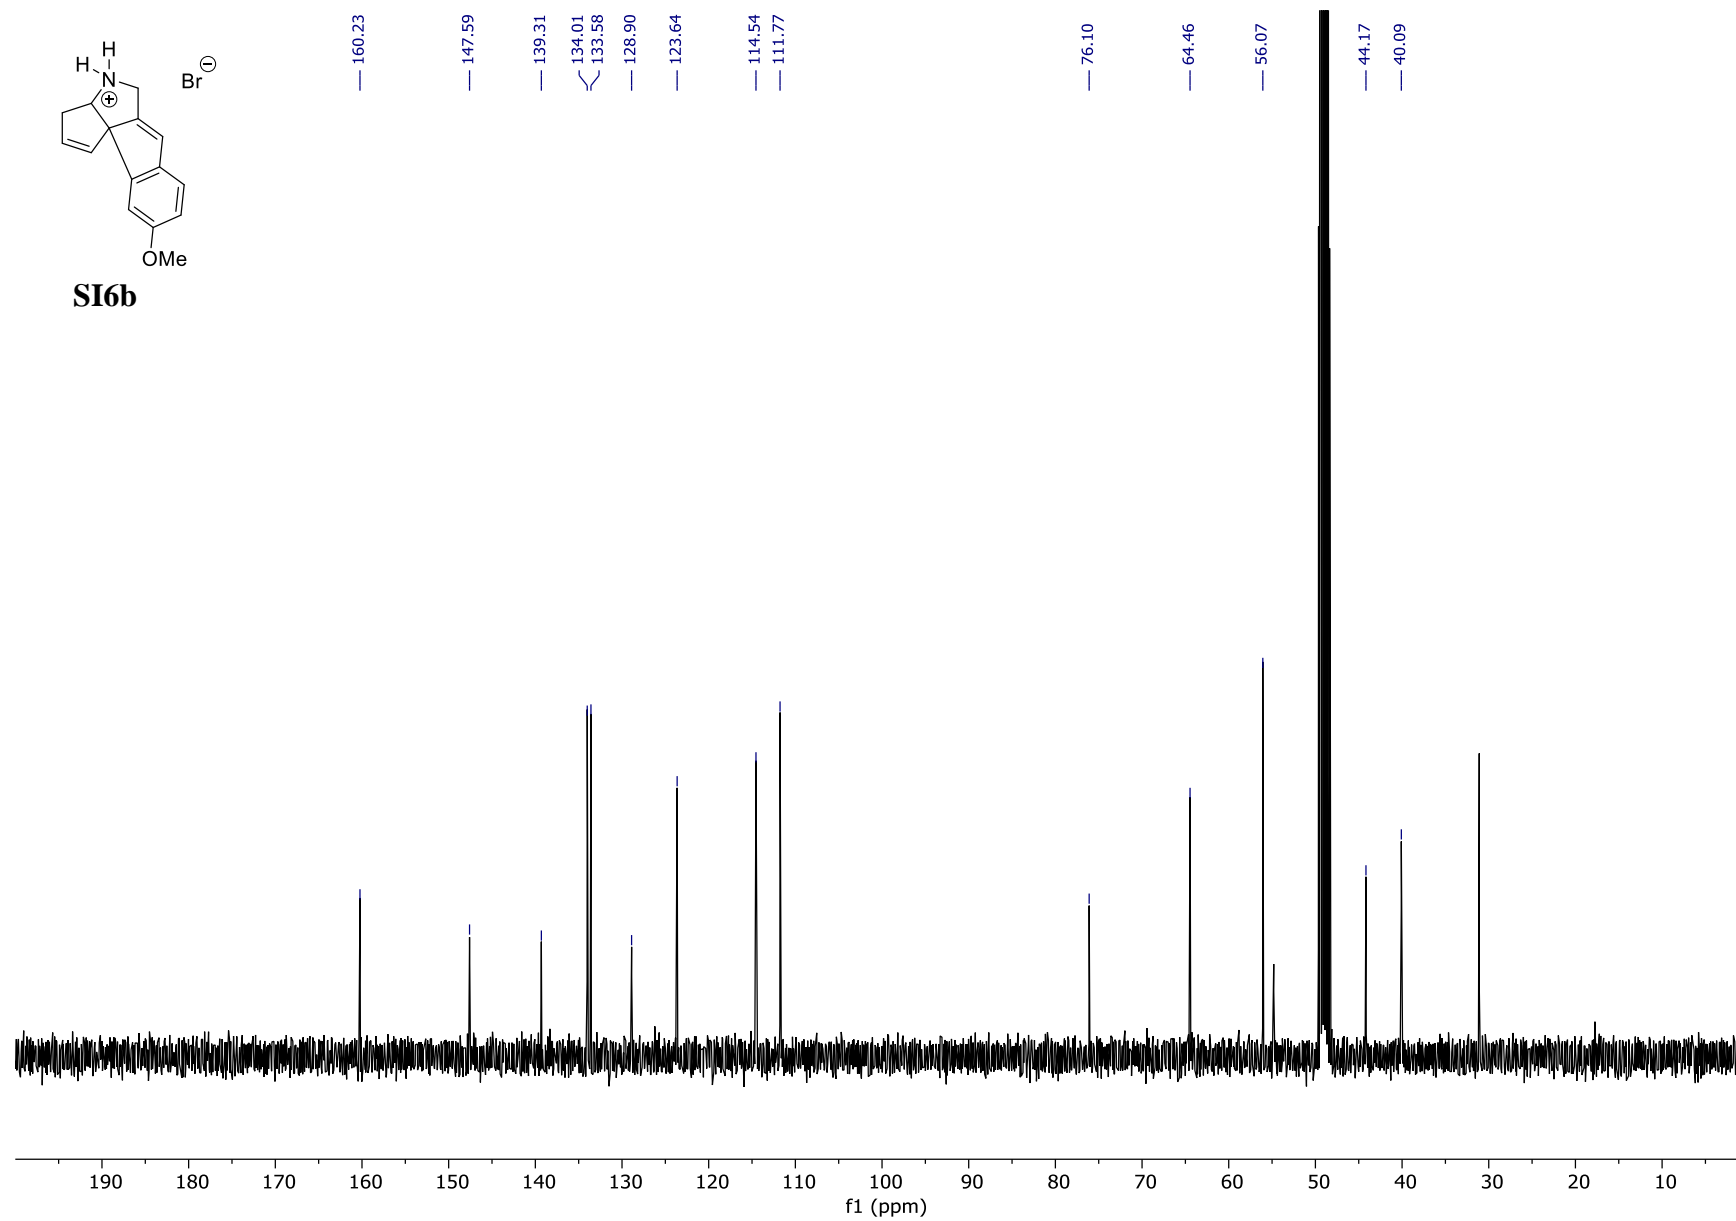

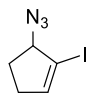

SI7

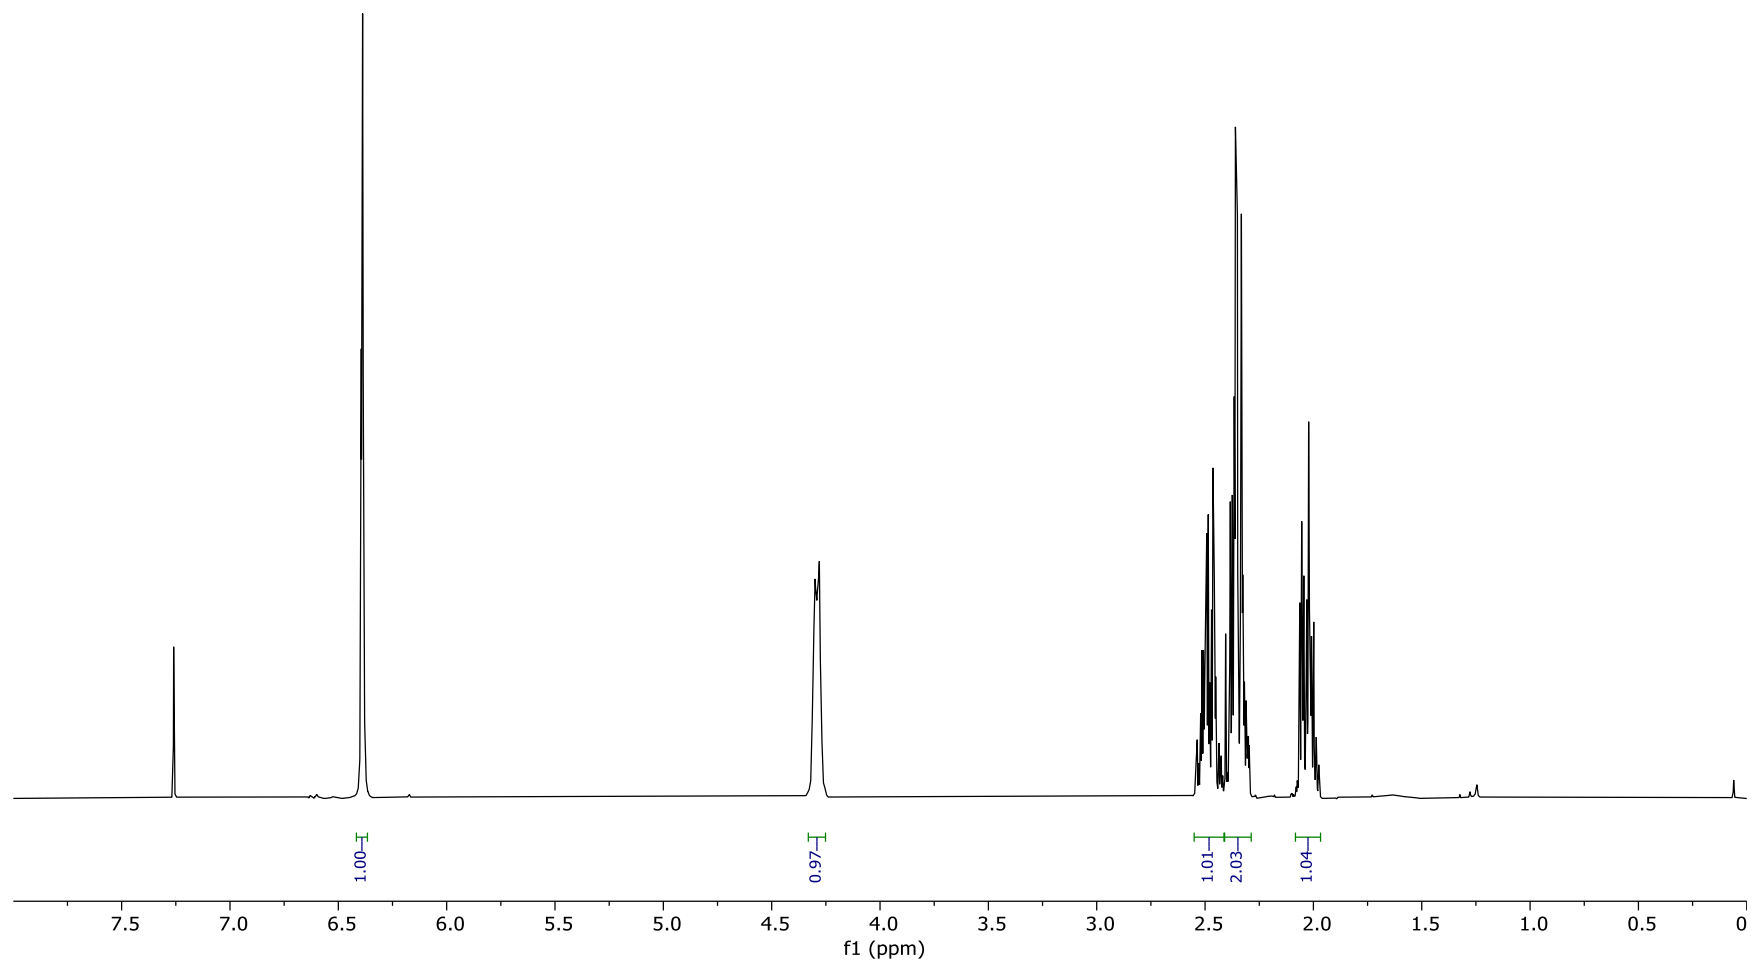

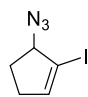

SI7

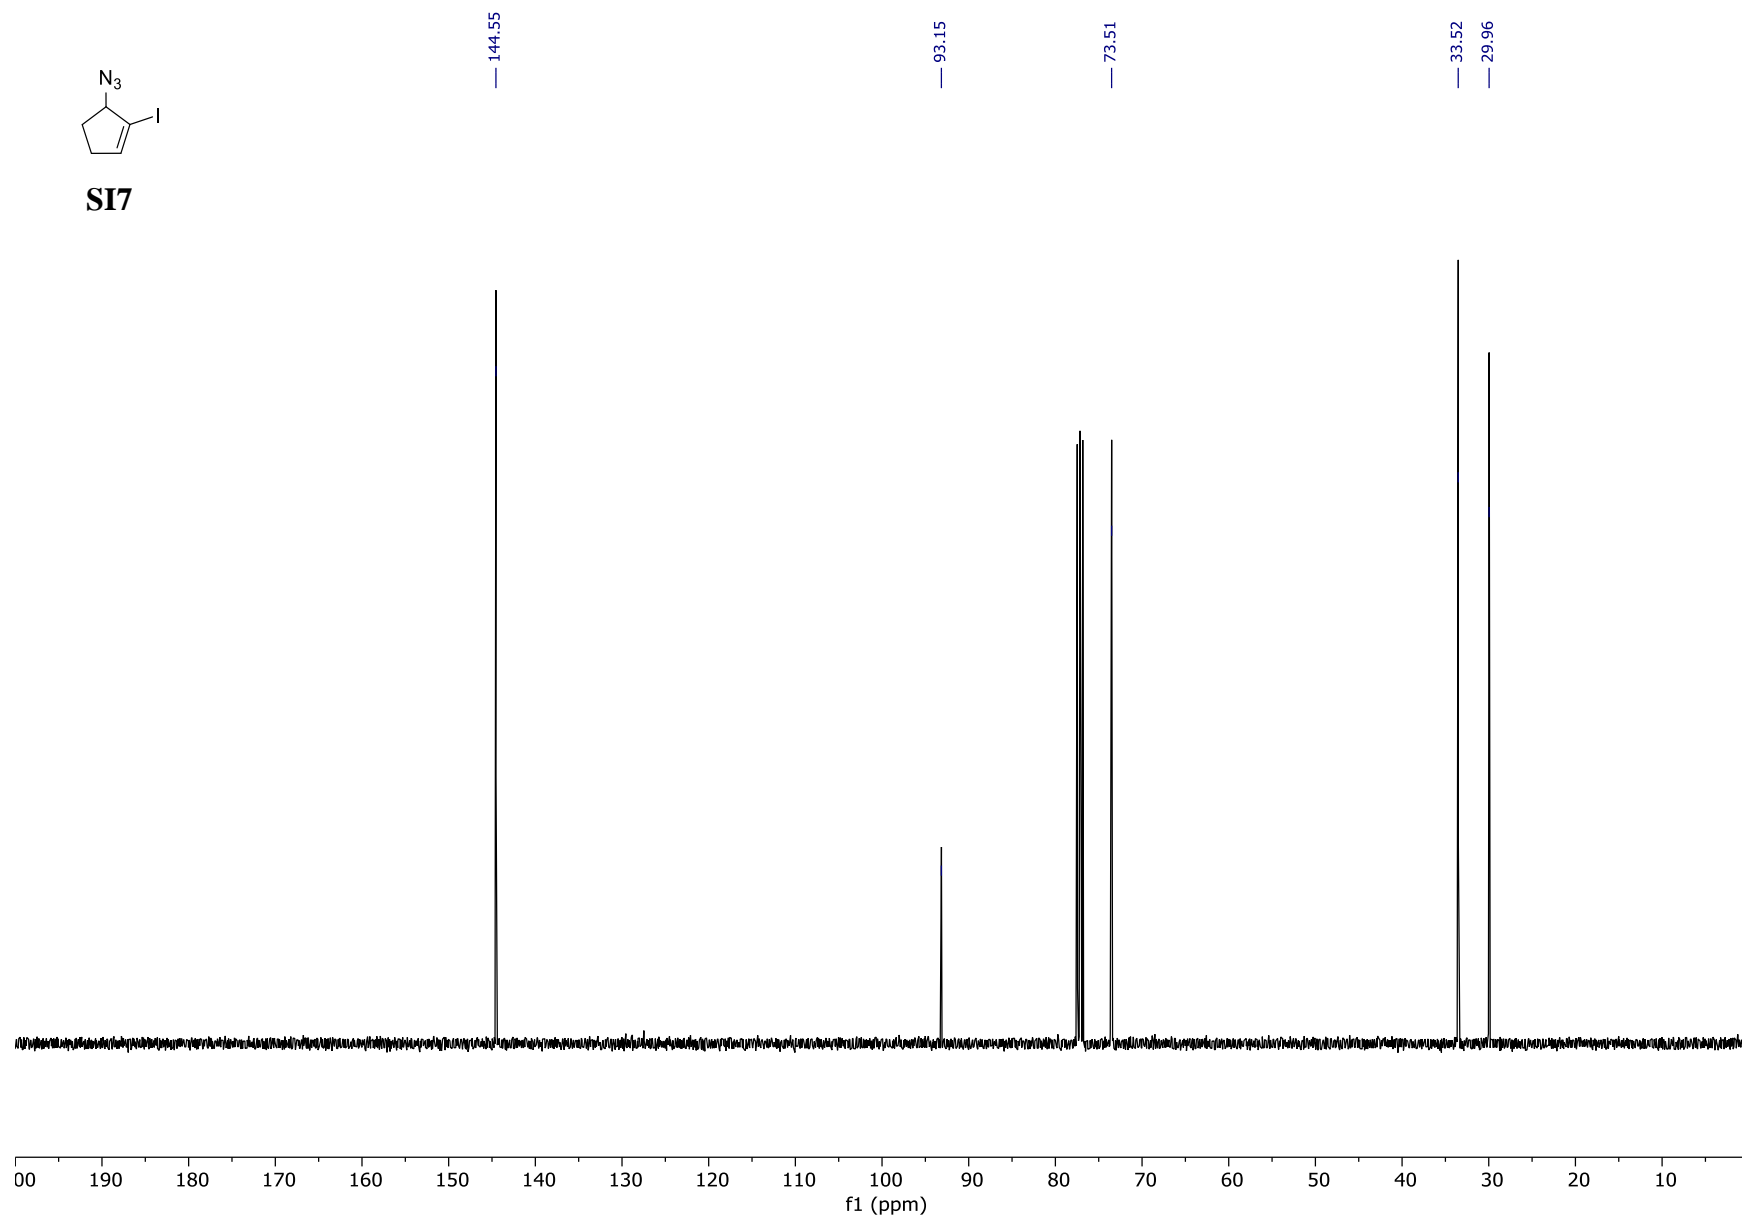

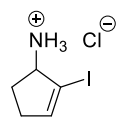**SI8**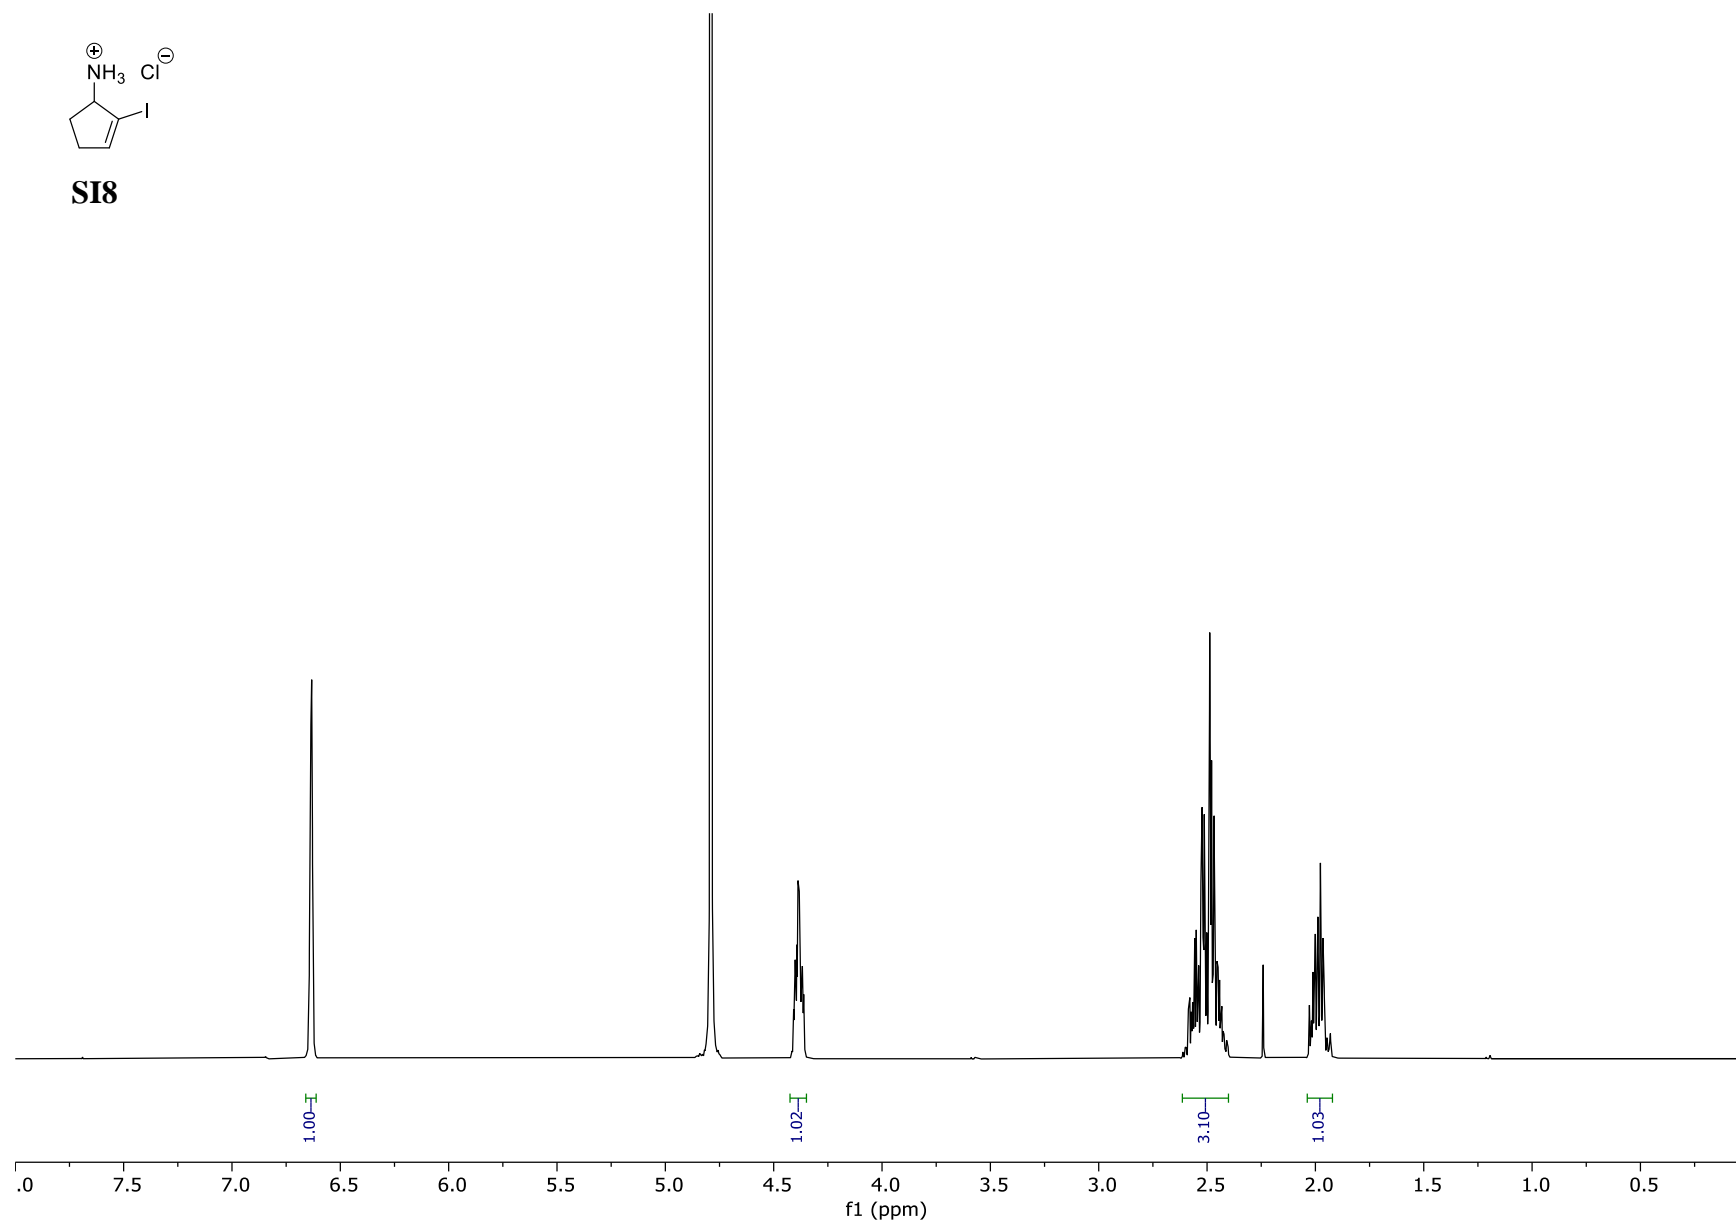



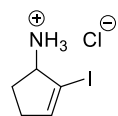**SI8**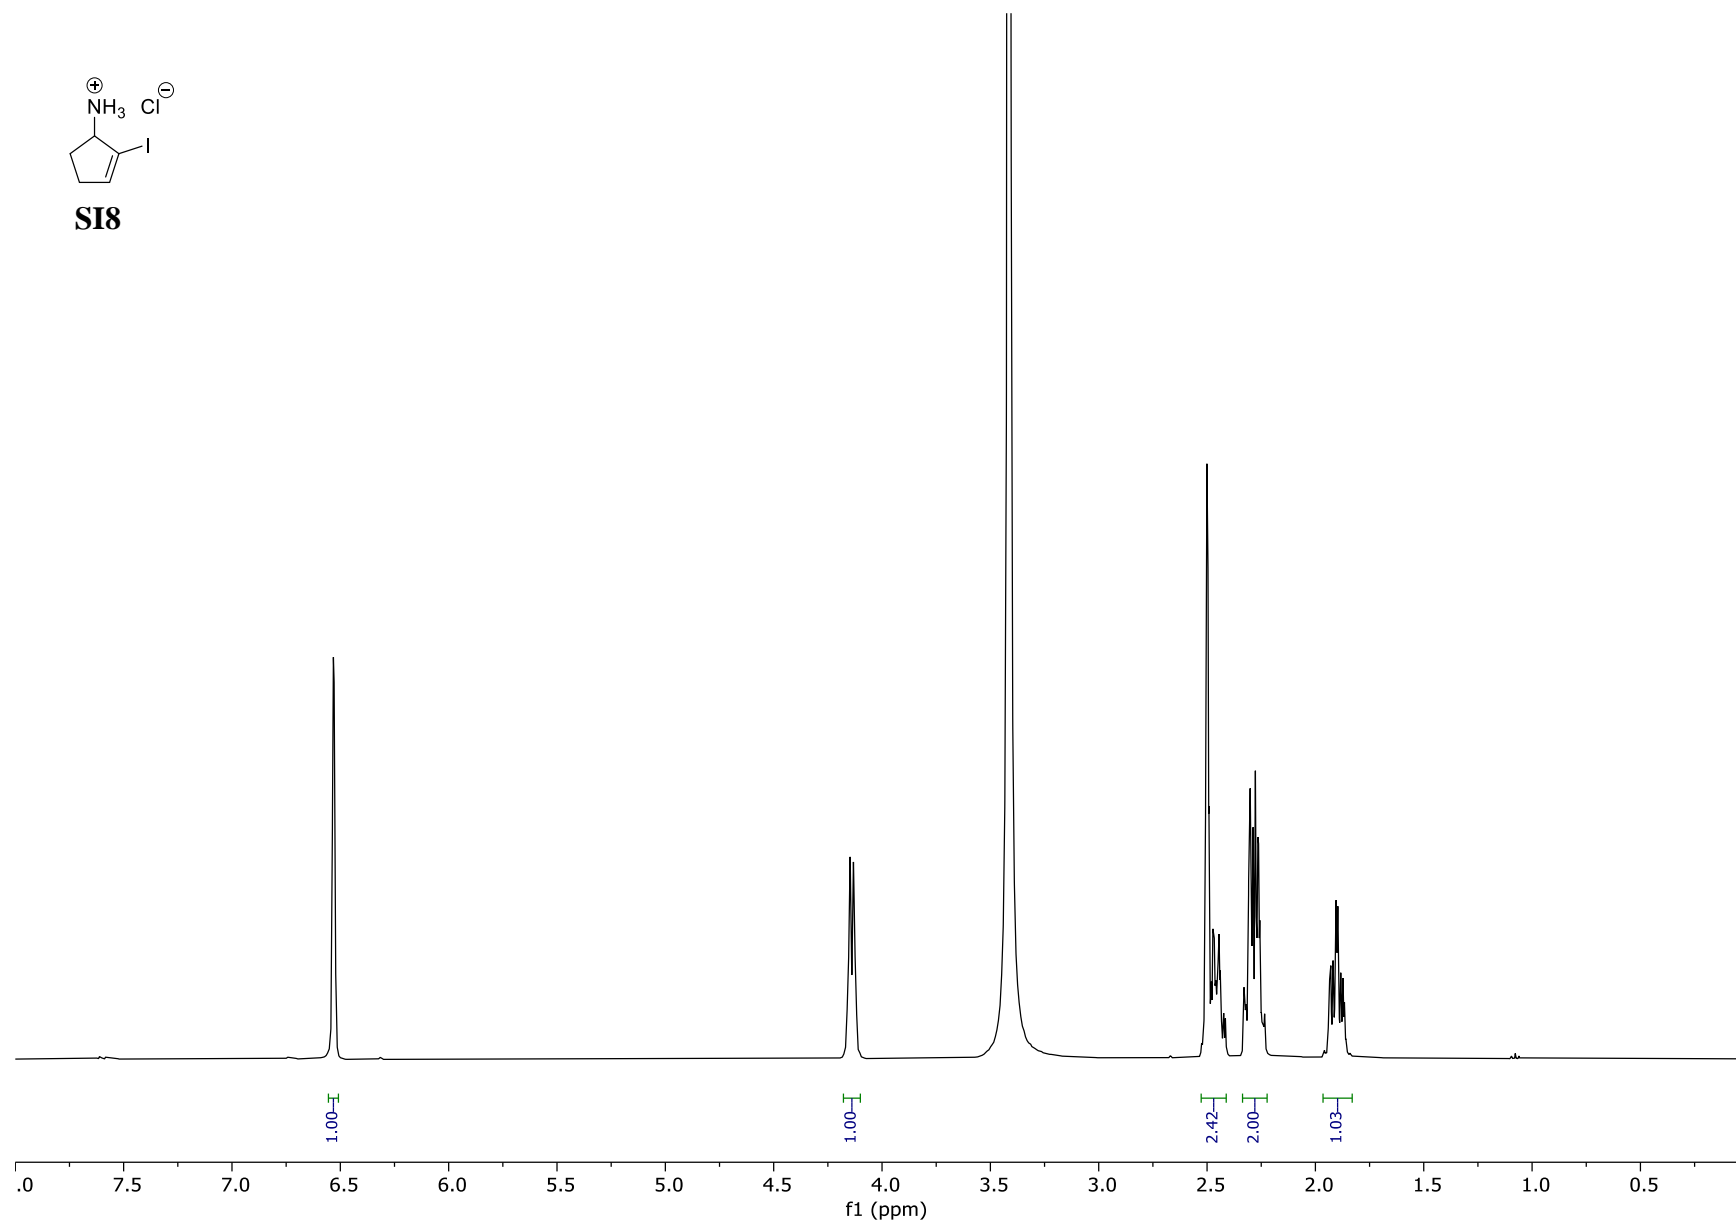

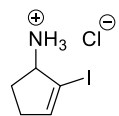

SI8

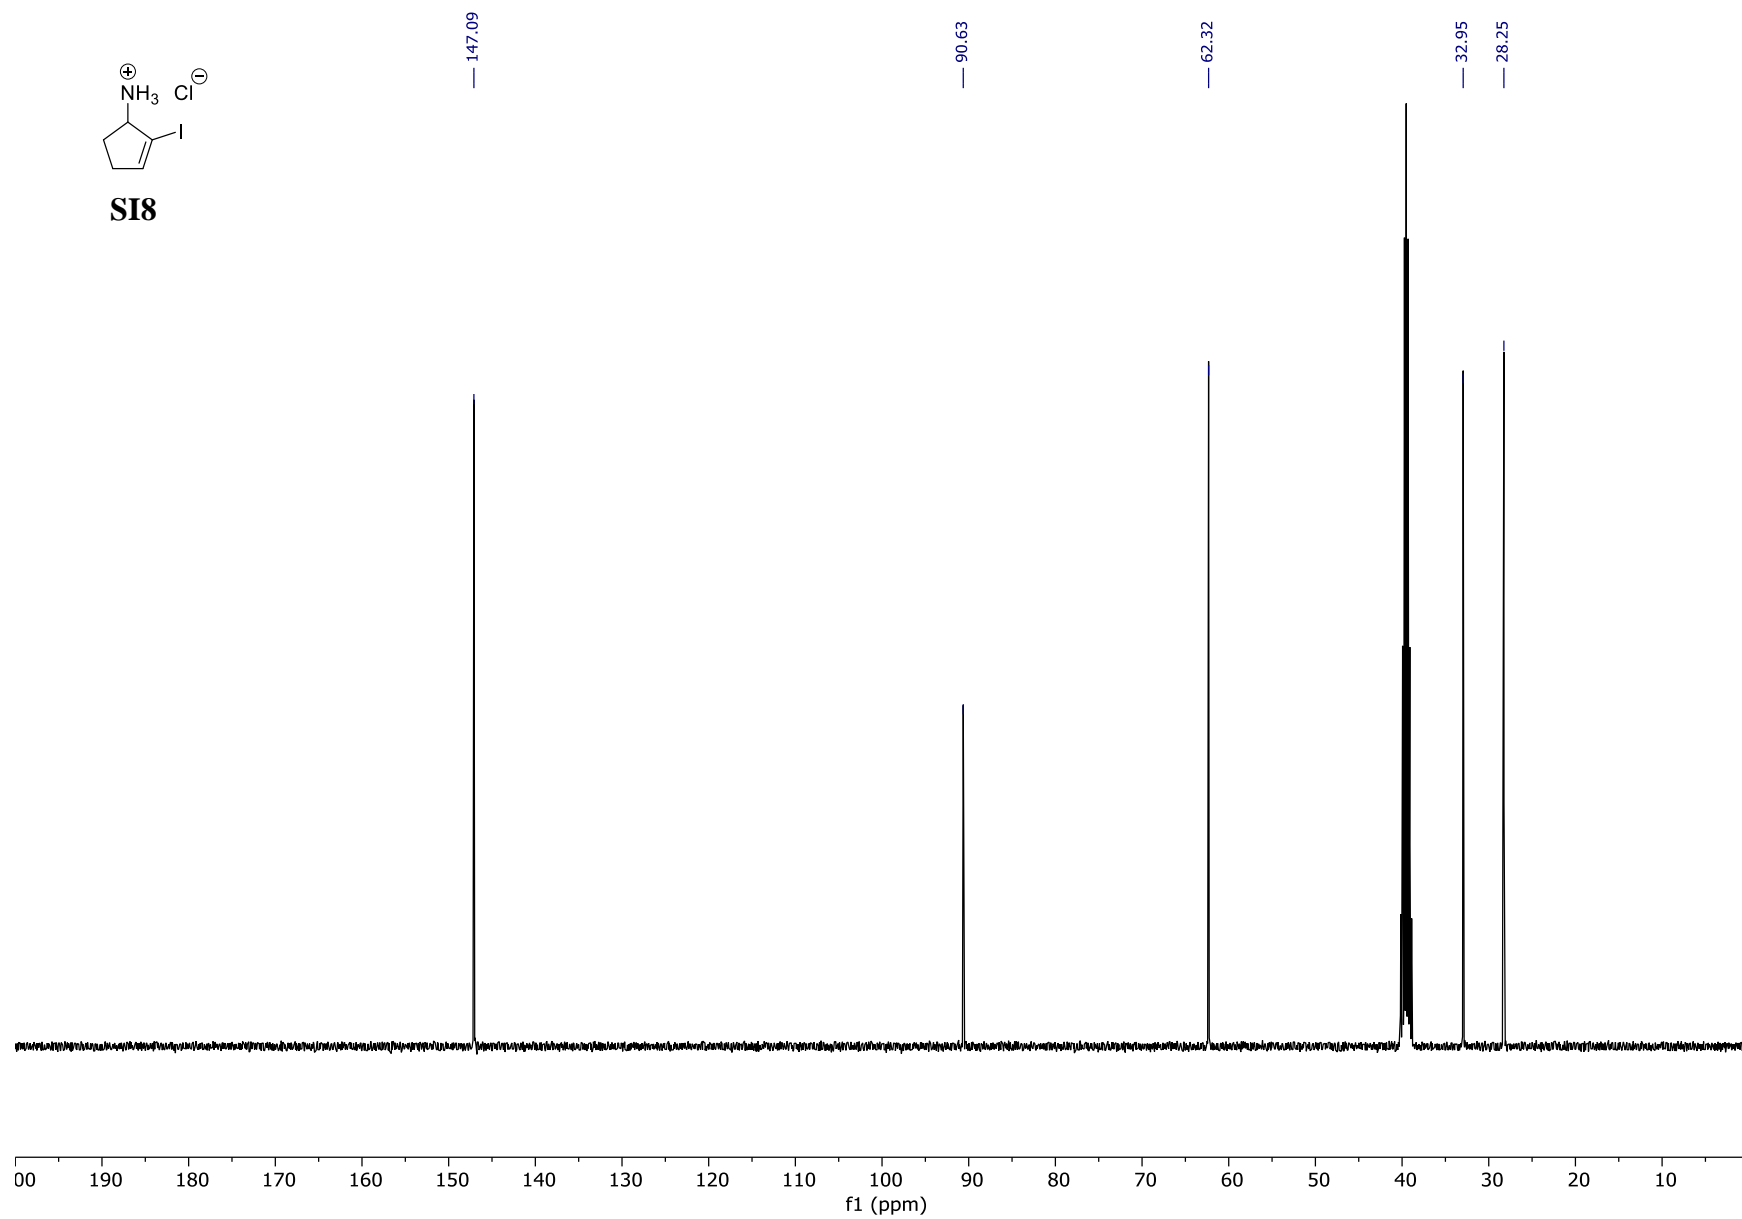

Supplement: d2ob00553k1.pdf [file d2ob00553k1.pdf]
